# Supplementary material for: Finite Element Analysis of Surrounding Rock with a Thermal Insulation Layer in a Deep Mine
Source: Hindawi journal article supplement (doi:10.1155/2020/5021853), 2020-09-30
Supplement: f1 [file 5021853.f1.pdf]

# Data for tecplot

## Transient temperature contours

| VARIABLES = X, Y, T/°C" |                                          |             |  |
|-------------------------|------------------------------------------|-------------|--|
| ZONE                    | N= 840 ,E = 1600 ,f=FEPOINT, ET=TRIANGLE |             |  |
| 0.05                    | 0                                        | 13.30977482 |  |
| 5.70E-02                | 0                                        | 13.95942454 |  |
| 6.47E-02                | 0                                        | 14.58261411 |  |
| 7.31E-02                | 0                                        | 15.18111975 |  |
| 0.08241205              | 0                                        | 15.755805   |  |
| 9.26E-02                | 0                                        | 16.30670512 |  |
| 0.10388466              | 0                                        | 16.83308214 |  |
| 0.11625698              | 0                                        | 17.33346935 |  |
| 0.12986653              | 0                                        | 17.80572498 |  |
| 0.14483703              | 0                                        | 18.24711682 |  |
| 0.16130458              | 0                                        | 18.65446147 |  |
| 0.17941889              | 0                                        | 19.02434207 |  |
| 0.19934463              | 0                                        | 19.35342339 |  |
| 0.22126294              | 0                                        | 19.63886992 |  |
| 0.24537308              | 0                                        | 19.87884777 |  |
| 0.27189424              | 0                                        | 20.0730563  |  |
| 0.30106752              | 0                                        | 20.22319881 |  |
| 0.33315812              | 0                                        | 20.33328812 |  |
| 0.36845778              | 0                                        | 20.40973733 |  |
| 0.40728741              | 0                                        | 20.46137988 |  |

| 0.45       | 0           | 20.5        |
|------------|-------------|-------------|
| 4.94E-02   | 7.82E-03    | 13.30870162 |
| 0.05637901 | 8.97E-03    | 13.96722209 |
| 6.41E-02   | 1.02E-02    | 14.59768667 |
| 7.25E-02   | 1.16E-02    | 15.20216426 |
| 0.08184635 | 1.32E-02    | 15.78169955 |
| 9.21E-02   | 0.014844815 | 16.33643881 |
| 0.10335201 | 1.67E-02    | 16.86570931 |
| 0.11574336 | 1.87E-02    | 17.36807897 |
| 0.12937385 | 2.10E-02    | 17.84142074 |
| 0.1443674  | 2.34E-02    | 18.28300632 |
| 0.16086029 | 2.62E-02    | 18.68965492 |
| 0.17900248 | 2.91E-02    | 19.05796229 |
| 0.19895888 | 0.03242145  | 19.38462948 |
| 0.22091092 | 3.60E-02    | 19.66689675 |
| 0.24505817 | 4.00E-02    | 19.90306106 |
| 0.27162015 | 4.44E-02    | 20.09301777 |
| 0.30083832 | 4.92E-02    | 20.23872658 |
| 0.3329783  | 5.45E-02    | 20.34448477 |
| 0.36833229 | 6.03E-02    | 20.41694276 |
| 0.40722168 | 6.67E-02    | 20.46498427 |
| 0.45       | 7.37E-02    | 20.5        |
| 4.76E-02   | 1.55E-02    | 13.30806783 |
| 5.46E-02   | 1.79E-02    | 13.99619657 |
| 6.23E-02   | 2.06E-02    | 14.65096912 |
| 7.08E-02   | 2.35E-02    | 15.2753481  |

|            |             |             |
|------------|-------------|-------------|
| 8.02E-02   | 2.67E-02    | 15.8709402  |
| 0.09045078 | 3.03E-02    | 16.43824035 |
| 0.10176715 | 0.034221271 | 16.97677758 |
| 0.11421516 | 3.85E-02    | 17.48521905 |
| 0.12790797 | 4.33E-02    | 17.9614712  |
| 0.14297006 | 4.85E-02    | 18.40281103 |
| 0.15953836 | 5.42E-02    | 18.80607793 |
| 0.17776349 | 6.05E-02    | 19.16795341 |
| 0.19781113 | 6.75E-02    | 19.48534665 |
| 0.21986354 | 7.51E-02    | 19.75588409 |
| 0.24412119 | 8.35E-02    | 19.97846725 |
| 0.2708046  | 9.27E-02    | 20.15381706 |
| 0.30015636 | 0.10290882  | 20.28487732 |
| 0.33244329 | 0.114087402 | 20.37693353 |
| 0.36795891 | 0.126383842 | 20.43735835 |
| 0.4070261  | 0.139909926 | 20.47506133 |
| 0.45       | 0.154788619 | 20.5        |
| 4.46E-02   | 2.27E-02    | 13.3081197  |
| 5.16E-02   | 2.66E-02    | 14.04955861 |
| 5.94E-02   | 3.08E-02    | 14.74740003 |
| 6.80E-02   | 3.55E-02    | 15.4064523  |
| 0.07740396 | 4.06E-02    | 16.02946266 |
| 8.78E-02   | 4.63E-02    | 16.61763266 |
| 9.92E-02   | 0.052508092 | 17.17090597 |
| 0.11171    | 5.94E-02    | 17.68816732 |
| 0.12550497 | 6.69E-02    | 18.16742545 |

|            |             |             |
|------------|-------------|-------------|
| 0.14067943 | 7.52E-02    | 18.60602881 |
| 0.15737134 | 8.43E-02    | 19.00095168 |
| 0.17573244 | 9.43E-02    | 19.34917804 |
| 0.19592965 | 0.105315787 | 19.64819264 |
| 0.21814659 | 0.117440824 | 19.89655733 |
| 0.24258521 | 0.130778364 | 20.09450478 |
| 0.2694677  | 0.145449658 | 20.24442743 |
| 0.29903843 | 0.161588081 | 20.35109875 |
| 0.33156624 | 0.179340347 | 20.42147067 |
| 0.36734683 | 0.19886784  | 20.46398044 |
| 0.40670548 | 0.220348082 | 20.48747132 |
| 0.45       | 0.243976348 | 20.5        |
| 4.05E-02   | 2.94E-02    | 13.3090321  |
| 4.76E-02   | 3.48E-02    | 14.12872699 |
| 5.55E-02   | 4.09E-02    | 14.88803652 |
| 6.41E-02   | 4.75E-02    | 15.59513362 |
| 7.36E-02   | 5.47E-02    | 16.25482271 |
| 8.41E-02   | 6.27E-02    | 16.86957761 |
| 9.56E-02   | 7.15E-02    | 17.44009897 |
| 0.10828957 | 8.12E-02    | 17.96570493 |
| 0.12222402 | 9.18E-02    | 18.4446824  |
| 0.13755191 | 0.103526589 | 18.87466872 |
| 0.15441259 | 0.116399834 | 19.25310707 |
| 0.17295934 | 0.130560404 | 19.57779466 |
| 0.19336076 | 0.146137031 | 19.84750831 |
| 0.21580233 | 0.163271321 | 20.06264471 |

|            |             |             |
|------------|-------------|-------------|
| 0.24048805 | 0.182119039 | 20.22575741 |
| 0.26764235 | 0.202851529 | 20.34182736 |
| 0.29751207 | 0.225657269 | 20.41810088 |
| 0.33036877 | 0.250743582 | 20.46340107 |
| 0.36651113 | 0.278338527 | 20.48697537 |
| 0.40626774 | 0.308692966 | 20.49713011 |
| 0.45       | 0.342082849 | 20.5        |
| 3.54E-02   | 3.54E-02    | 13.31074378 |
| 4.26E-02   | 4.26E-02    | 14.23316521 |
| 5.06E-02   | 5.06E-02    | 15.07001869 |
| 5.93E-02   | 5.93E-02    | 15.83514482 |
| 6.90E-02   | 6.90E-02    | 16.53687455 |
| 7.96E-02   | 7.96E-02    | 17.17978587 |
| 9.12E-02   | 9.12E-02    | 17.76581318 |
| 0.10403809 | 0.104038095 | 18.29504466 |
| 0.11814591 | 0.118145911 | 18.76640168 |
| 0.13366451 | 0.133664508 | 19.17830706 |
| 0.15073497 | 0.150734965 | 19.52938912 |
| 0.16951247 | 0.169512468 | 19.81921446 |
| 0.19016772 | 0.190167721 | 20.04898635 |
| 0.2128885  | 0.212888499 | 20.22209137 |
| 0.23788136 | 0.237881356 | 20.34434226 |
| 0.2653735  | 0.265373497 | 20.42377445 |
| 0.29561485 | 0.295614853 | 20.46993224 |
| 0.32888034 | 0.328880345 | 20.49272773 |
| 0.36547239 | 0.365472386 | 20.50113267 |

|            |             |             |
|------------|-------------|-------------|
| 0.40572363 | 0.405723631 | 20.50208696 |
| 0.45       | 0.45        | 20.5        |
| 2.94E-02   | 4.05E-02    | 13.31239745 |
| 3.48E-02   | 4.76E-02    | 14.1329087  |
| 4.09E-02   | 5.55E-02    | 14.89321389 |
| 4.75E-02   | 6.41E-02    | 15.60106435 |
| 5.47E-02   | 7.36E-02    | 16.26124699 |
| 0.06272013 | 8.41E-02    | 16.87624715 |
| 7.15E-02   | 9.56E-02    | 17.44674431 |
| 8.12E-02   | 0.108289573 | 17.97201073 |
| 9.18E-02   | 0.122224019 | 18.45028787 |
| 0.10352659 | 0.137551911 | 18.879199   |
| 0.11639983 | 0.154412592 | 19.25623545 |
| 0.1305604  | 0.17295934  | 19.57932649 |
| 0.14613703 | 0.193360764 | 19.84746485 |
| 0.16327132 | 0.21580233  | 20.06131286 |
| 0.18211904 | 0.240488052 | 20.22366791 |
| 0.20285153 | 0.267642347 | 20.33963934 |
| 0.22565727 | 0.297512071 | 20.41640853 |
| 0.25074358 | 0.330368768 | 20.46252674 |
| 0.27833853 | 0.366511134 | 20.48684569 |
| 0.30869297 | 0.406267737 | 20.4973212  |
| 0.34208285 | 0.45        | 20.5        |
| 2.27E-02   | 4.46E-02    | 13.31272111 |
| 2.66E-02   | 5.16E-02    | 14.05507095 |
| 3.08E-02   | 5.94E-02    | 14.7540889  |

|            |             |             |
|------------|-------------|-------------|
| 3.55E-02   | 6.80E-02    | 15.4141662  |
| 4.06E-02   | 0.077403961 | 16.03795171 |
| 4.63E-02   | 8.78E-02    | 16.62662063 |
| 5.25E-02   | 9.92E-02    | 17.18008567 |
| 5.94E-02   | 0.111710002 | 17.69718197 |
| 6.69E-02   | 0.125504969 | 18.17586197 |
| 7.52E-02   | 0.140679432 | 18.61343603 |
| 8.43E-02   | 0.157371342 | 19.00688986 |
| 9.43E-02   | 0.175732442 | 19.3532985  |
| 0.10531579 | 0.195929653 | 19.65033388 |
| 0.11744082 | 0.218146585 | 19.89682977 |
| 0.13077836 | 0.24258521  | 20.09332404 |
| 0.14544966 | 0.269467698 | 20.24245817 |
| 0.16158808 | 0.299038434 | 20.34909511 |
| 0.17934035 | 0.331566244 | 20.42004627 |
| 0.19886784 | 0.367346835 | 20.46338858 |
| 0.22034808 | 0.406705485 | 20.48749112 |
| 0.24397635 | 0.45        | 20.5        |
| 1.55E-02   | 4.76E-02    | 13.31211084 |
| 1.79E-02   | 5.46E-02    | 14.00092639 |
| 2.06E-02   | 6.23E-02    | 14.65661    |
| 2.35E-02   | 7.08E-02    | 15.28184975 |
| 2.67E-02   | 8.02E-02    | 15.87815086 |
| 3.03E-02   | 9.05E-02    | 16.44596523 |
| 3.42E-02   | 0.101767151 | 16.98478882 |
| 3.85E-02   | 0.11421516  | 17.4932495  |

|            |             |             |
|------------|-------------|-------------|
| 0.04327191 | 0.12790797  | 17.96920962 |
| 4.85E-02   | 0.142970061 | 18.40990954 |
| 5.42E-02   | 0.159538361 | 18.81217877 |
| 6.05E-02   | 0.177763492 | 19.17273755 |
| 6.75E-02   | 0.197811135 | 19.48859979 |
| 7.51E-02   | 0.219863542 | 19.75756593 |
| 8.35E-02   | 0.244121191 | 19.97875968 |
| 9.27E-02   | 0.270804604 | 20.15312231 |
| 0.10290882 | 0.300156358 | 20.28374524 |
| 0.1140874  | 0.332443288 | 20.37592064 |
| 0.12638384 | 0.367958911 | 20.43684958 |
| 0.13990993 | 0.407026096 | 20.47508559 |
| 0.15478862 | 0.45        | 20.5        |
| 7.82E-03   | 4.94E-02    | 13.31100955 |
| 8.97E-03   | 5.64E-02    | 13.96987078 |
| 1.02E-02   | 6.41E-02    | 14.6008003  |
| 1.16E-02   | 7.25E-02    | 15.20573798 |
| 1.32E-02   | 8.18E-02    | 15.78567019 |
| 0.01484482 | 0.092087136 | 16.3407143  |
| 1.67E-02   | 0.103352005 | 16.87017685 |
| 1.87E-02   | 0.115743362 | 17.37260436 |
| 2.10E-02   | 0.129373854 | 17.84584668 |
| 2.34E-02   | 0.144367396 | 18.287155   |
| 2.62E-02   | 0.160860291 | 18.69333884 |
| 2.91E-02   | 0.179002477 | 19.06100525 |
| 3.24E-02   | 0.19895888  | 19.38689708 |



|            |             |             |
|------------|-------------|-------------|
| 3.60E-02   | 0.220910924 | 19.66833107 |
| 4.00E-02   | 0.245058173 | 19.90370977 |
| 4.44E-02   | 0.271620146 | 20.09304412 |
| 4.92E-02   | 0.300838317 | 20.2383886  |
| 5.45E-02   | 0.332978305 | 20.34408005 |
| 0.06027741 | 0.368332291 | 20.4167241  |
| 6.67E-02   | 0.407221676 | 20.46503922 |
| 7.37E-02   | 0.45        | 20.5        |
| 2.33E-15   | 0.05        | 13.30977482 |
| 2.29E-15   | 5.70E-02    | 13.95942454 |
| 2.25E-15   | 6.47E-02    | 14.58261411 |
| 2.20E-15   | 7.31E-02    | 15.18111975 |
| 2.15E-15   | 0.082412047 | 15.755805   |
| 2.09E-15   | 9.26E-02    | 16.30670512 |
| 2.02E-15   | 0.103884662 | 16.83308214 |
| 1.95E-15   | 0.116256978 | 17.33346935 |
| 1.87E-15   | 0.129866526 | 17.80572498 |
| 1.78E-15   | 0.144837029 | 18.24711682 |
| 1.68E-15   | 0.161304581 | 18.65446147 |
| 1.58E-15   | 0.179418889 | 19.02434207 |
| 1.46E-15   | 0.199344628 | 19.35342339 |
| 1.33E-15   | 0.221262941 | 19.63886992 |
| 1.19E-15   | 0.245373085 | 19.87884777 |
| 1.04E-15   | 0.271894243 | 20.0730563  |
| 8.69E-16   | 0.301067518 | 20.22319881 |
| 6.82E-16   | 0.333158119 | 20.33328812 |

|            |             |             |
|------------|-------------|-------------|
| 4.76E-16   | 0.368457781 | 20.40973733 |
| 2.49E-16   | 0.407287409 | 20.46137988 |
| -3.47E-32  | 0.45        | 20.5        |
| -7.82E-03  | 4.94E-02    | 13.30870162 |
| -8.97E-03  | 5.64E-02    | 13.96722209 |
| -1.02E-02  | 0.064073072 | 14.59768667 |
| -1.16E-02  | 7.25E-02    | 15.20216426 |
| -1.32E-02  | 8.18E-02    | 15.78169955 |
| -1.48E-02  | 9.21E-02    | 16.33643881 |
| -1.67E-02  | 0.103352005 | 16.86570931 |
| -1.87E-02  | 0.115743362 | 17.36807897 |
| -2.10E-02  | 0.129373854 | 17.84142074 |
| -2.34E-02  | 0.144367396 | 18.28300632 |
| -2.62E-02  | 0.160860291 | 18.68965492 |
| -2.91E-02  | 0.179002477 | 19.05796229 |
| -3.24E-02  | 0.19895888  | 19.38462948 |
| -0.0360318 | 0.220910924 | 19.66689675 |
| -4.00E-02  | 0.245058173 | 19.90306106 |
| -4.44E-02  | 0.271620146 | 20.09301777 |
| -4.92E-02  | 0.300838317 | 20.23872658 |
| -0.0544629 | 0.332978305 | 20.34448477 |
| -6.03E-02  | 0.368332291 | 20.41694276 |
| -0.0666733 | 0.407221676 | 20.46498427 |
| -7.37E-02  | 0.45        | 20.5        |
| -1.55E-02  | 4.76E-02    | 13.30806783 |
| -1.79E-02  | 5.46E-02    | 13.99619657 |

|            |             |             |
|------------|-------------|-------------|
| -2.06E-02  | 6.23E-02    | 14.65096912 |
| -2.35E-02  | 7.08E-02    | 15.2753481  |
| -2.67E-02  | 8.02E-02    | 15.8709402  |
| -3.03E-02  | 9.05E-02    | 16.43824035 |
| -3.42E-02  | 0.101767151 | 16.97677758 |
| -3.85E-02  | 0.11421516  | 17.48521905 |
| -4.33E-02  | 0.12790797  | 17.9614712  |
| -4.85E-02  | 0.142970061 | 18.40281103 |
| -5.42E-02  | 0.159538361 | 18.80607793 |
| -6.05E-02  | 0.177763492 | 19.16795341 |
| -6.75E-02  | 0.197811135 | 19.48534665 |
| -7.51E-02  | 0.219863542 | 19.75588409 |
| -8.35E-02  | 0.244121191 | 19.97846725 |
| -9.27E-02  | 0.270804604 | 20.15381706 |
| -0.1029088 | 0.300156358 | 20.28487732 |
| -0.1140874 | 0.332443288 | 20.37693353 |
| -0.1263838 | 0.367958911 | 20.43735835 |
| -0.1399099 | 0.407026096 | 20.47506133 |
| -0.1547886 | 0.45        | 20.5        |
| -2.27E-02  | 4.46E-02    | 13.3081197  |
| -2.66E-02  | 5.16E-02    | 14.04955861 |
| -3.08E-02  | 5.94E-02    | 14.74740003 |
| -3.55E-02  | 6.80E-02    | 15.4064523  |
| -4.06E-02  | 7.74E-02    | 16.02946266 |
| -4.63E-02  | 8.78E-02    | 16.61763266 |
| -5.25E-02  | 9.92E-02    | 17.17090597 |

|            |             |             |
|------------|-------------|-------------|
| -5.94E-02  | 0.111710002 | 17.68816732 |
| -6.69E-02  | 0.125504969 | 18.16742545 |
| -7.52E-02  | 0.140679432 | 18.60602881 |
| -8.43E-02  | 0.157371342 | 19.00095168 |
| -0.094293  | 0.175732442 | 19.34917804 |
| -0.1053158 | 0.195929653 | 19.64819264 |
| -0.1174408 | 0.218146585 | 19.89655733 |
| -0.1307784 | 0.24258521  | 20.09450478 |
| -0.1454497 | 0.269467698 | 20.24442743 |
| -0.1615881 | 0.299038434 | 20.35109875 |
| -0.1793403 | 0.331566244 | 20.42147067 |
| -0.1988678 | 0.367346835 | 20.46398044 |
| -0.2203481 | 0.406705485 | 20.48747132 |
| -0.2439763 | 0.45        | 20.5        |
| -0.0293893 | 4.05E-02    | 13.3090321  |
| -3.48E-02  | 4.76E-02    | 14.12872699 |
| -4.09E-02  | 0.055467056 | 14.88803652 |
| -4.75E-02  | 0.064119251 | 15.59513362 |
| -5.47E-02  | 7.36E-02    | 16.25482271 |
| -6.27E-02  | 8.41E-02    | 16.86957761 |
| -7.15E-02  | 9.56E-02    | 17.44009897 |
| -8.12E-02  | 0.108289573 | 17.96570493 |
| -9.18E-02  | 0.122224019 | 18.4446824  |
| -0.1035266 | 0.137551911 | 18.87466872 |
| -0.1163998 | 0.154412592 | 19.25310707 |
| -0.1305604 | 0.17295934  | 19.57779466 |

|            |             |             |
|------------|-------------|-------------|
| -0.146137  | 0.193360764 | 19.84750831 |
| -0.1632713 | 0.21580233  | 20.06264471 |
| -0.182119  | 0.240488052 | 20.22575741 |
| -0.2028515 | 0.267642347 | 20.34182736 |
| -0.2256573 | 0.297512071 | 20.41810088 |
| -0.2507436 | 0.330368768 | 20.46340107 |
| -0.2783385 | 0.366511134 | 20.48697537 |
| -0.308693  | 0.406267737 | 20.49713011 |
| -0.3420828 | 0.45        | 20.5        |
| -3.54E-02  | 3.54E-02    | 13.31074378 |
| -4.26E-02  | 4.26E-02    | 14.23316521 |
| -5.06E-02  | 5.06E-02    | 15.07001869 |
| -5.93E-02  | 5.93E-02    | 15.83514482 |
| -6.90E-02  | 6.90E-02    | 16.53687455 |
| -7.96E-02  | 7.96E-02    | 17.17978587 |
| -9.12E-02  | 9.12E-02    | 17.76581318 |
| -0.1040381 | 0.104038095 | 18.29504466 |
| -0.1181459 | 0.118145911 | 18.76640168 |
| -0.1336645 | 0.133664508 | 19.17830706 |
| -0.150735  | 0.150734965 | 19.52938912 |
| -0.1695125 | 0.169512468 | 19.81921446 |
| -0.1901677 | 0.190167721 | 20.04898635 |
| -0.2128885 | 0.212888499 | 20.22209137 |
| -0.2378814 | 0.237881356 | 20.34434226 |
| -0.2653735 | 0.265373497 | 20.42377445 |
| -0.2956149 | 0.295614853 | 20.46993224 |

|            |             |             |
|------------|-------------|-------------|
| -0.3288803 | 0.328880345 | 20.49272773 |
| -0.3654724 | 0.365472386 | 20.50113267 |
| -0.4057236 | 0.405723631 | 20.50208696 |
| -0.45      | 0.45        | 20.5        |
| -4.05E-02  | 2.94E-02    | 13.31239745 |
| -4.76E-02  | 3.48E-02    | 14.1329087  |
| -5.55E-02  | 4.09E-02    | 14.89321389 |
| -6.41E-02  | 4.75E-02    | 15.60106435 |
| -7.36E-02  | 5.47E-02    | 16.26124699 |
| -8.41E-02  | 6.27E-02    | 16.87624715 |
| -0.0956219 | 7.15E-02    | 17.44674431 |
| -0.1082896 | 8.12E-02    | 17.97201073 |
| -0.122224  | 9.18E-02    | 18.45028787 |
| -0.1375519 | 0.103526589 | 18.879199   |
| -0.1544126 | 0.116399834 | 19.25623545 |
| -0.1729593 | 0.130560404 | 19.57932649 |
| -0.1933608 | 0.146137031 | 19.84746485 |
| -0.2158023 | 0.163271321 | 20.06131286 |
| -0.2404881 | 0.182119039 | 20.22366791 |
| -0.2676423 | 0.202851529 | 20.33963934 |
| -0.2975121 | 0.225657269 | 20.41640853 |
| -0.3303688 | 0.250743582 | 20.46252674 |
| -0.3665111 | 0.278338527 | 20.48684569 |
| -0.4062677 | 0.308692966 | 20.4973212  |
| -0.45      | 0.342082849 | 20.5        |
| -4.46E-02  | 2.27E-02    | 13.31272111 |

|            |             |             |
|------------|-------------|-------------|
| -5.16E-02  | 2.66E-02    | 14.05507095 |
| -5.94E-02  | 3.08E-02    | 14.7540889  |
| -6.80E-02  | 3.55E-02    | 15.4141662  |
| -0.077404  | 4.06E-02    | 16.03795171 |
| -8.78E-02  | 4.63E-02    | 16.62662063 |
| -9.92E-02  | 5.25E-02    | 17.18008567 |
| -0.11171   | 5.94E-02    | 17.69718197 |
| -0.125505  | 6.69E-02    | 18.17586197 |
| -0.1406794 | 0.075162616 | 18.61343603 |
| -0.1573713 | 8.43E-02    | 19.00688986 |
| -0.1757324 | 9.43E-02    | 19.3532985  |
| -0.1959297 | 0.105315787 | 19.65033388 |
| -0.2181466 | 0.117440824 | 19.89682977 |
| -0.2425852 | 0.130778364 | 20.09332404 |
| -0.2694677 | 0.145449658 | 20.24245817 |
| -0.2990384 | 0.161588081 | 20.34909511 |
| -0.3315662 | 0.179340347 | 20.42004627 |
| -0.3673468 | 0.19886784  | 20.46338858 |
| -0.4067055 | 0.220348082 | 20.48749112 |
| -0.45      | 0.243976348 | 20.5        |
| -4.76E-02  | 1.55E-02    | 13.31211084 |
| -5.46E-02  | 1.79E-02    | 14.00092639 |
| -6.23E-02  | 2.06E-02    | 14.65661    |
| -7.08E-02  | 2.35E-02    | 15.28184975 |
| -8.02E-02  | 2.67E-02    | 15.87815086 |
| -9.05E-02  | 3.03E-02    | 16.44596523 |

|            |             |             |
|------------|-------------|-------------|
| -0.1017672 | 3.42E-02    | 16.98478882 |
| -0.1142152 | 0.038531099 | 17.4932495  |
| -0.127908  | 4.33E-02    | 17.96920962 |
| -0.1429701 | 0.0484868   | 18.40990954 |
| -0.1595384 | 5.42E-02    | 18.81217877 |
| -0.1777635 | 6.05E-02    | 19.17273755 |
| -0.1978111 | 6.75E-02    | 19.48859979 |
| -0.2198635 | 7.51E-02    | 19.75756593 |
| -0.2441212 | 8.35E-02    | 19.97875968 |
| -0.2708046 | 9.27E-02    | 20.15312231 |
| -0.3001564 | 0.10290882  | 20.28374524 |
| -0.3324433 | 0.114087402 | 20.37592064 |
| -0.3679589 | 0.126383842 | 20.43684958 |
| -0.4070261 | 0.139909926 | 20.47508559 |
| -0.45      | 0.154788619 | 20.5        |
| -4.94E-02  | 7.82E-03    | 13.31100955 |
| -5.64E-02  | 8.97E-03    | 13.96987078 |
| -0.0640731 | 1.02E-02    | 14.6008003  |
| -7.25E-02  | 1.16E-02    | 15.20573798 |
| -8.18E-02  | 1.32E-02    | 15.78567019 |
| -9.21E-02  | 1.48E-02    | 16.3407143  |
| -0.103352  | 1.67E-02    | 16.87017685 |
| -0.1157434 | 1.87E-02    | 17.37260436 |
| -0.1293739 | 0.020977166 | 17.84584668 |
| -0.1443674 | 0.023443075 | 18.287155   |
| -0.1608603 | 2.62E-02    | 18.69333884 |



|            |             |             |
|------------|-------------|-------------|
| -0.1790025 | 0.029139325 | 19.06100525 |
| -0.1989589 | 3.24E-02    | 19.38689708 |
| -0.2209109 | 3.60E-02    | 19.66833107 |
| -0.2450582 | 4.00E-02    | 19.90370977 |
| -0.2716201 | 4.44E-02    | 20.09304412 |
| -0.3008383 | 4.92E-02    | 20.2383886  |
| -0.3329783 | 0.054462922 | 20.34408005 |
| -0.3683323 | 6.03E-02    | 20.4167241  |
| -0.4072217 | 6.67E-02    | 20.46503922 |
| -0.45      | 7.37E-02    | 20.5        |
| -0.05      | 4.67E-15    | 13.30977482 |
| -5.70E-02  | 4.59E-15    | 13.95942454 |
| -6.47E-02  | 4.50E-15    | 14.58261411 |
| -7.31E-02  | 4.40E-15    | 15.18111975 |
| -0.082412  | 4.29E-15    | 15.755805   |
| -9.26E-02  | 4.17E-15    | 16.30670512 |
| -0.1038847 | 4.04E-15    | 16.83308214 |
| -0.116257  | 3.90E-15    | 17.33346935 |
| -0.1298665 | 3.74E-15    | 17.80572498 |
| -0.144837  | 3.56E-15    | 18.24711682 |
| -0.1613046 | 3.37E-15    | 18.65446147 |
| -0.1794189 | 3.16E-15    | 19.02434207 |
| -0.1993446 | 2.93E-15    | 19.35342339 |
| -0.2212629 | 2.67E-15    | 19.63886992 |
| -0.2453731 | 2.39E-15    | 19.87884777 |
| -0.2718942 | 2.08E-15    | 20.0730563  |

|            |              |             |
|------------|--------------|-------------|
| -0.3010675 | 1.74E-15     | 20.22319881 |
| -0.3331581 | 1.36E-15     | 20.33328812 |
| -0.3684578 | 9.52E-16     | 20.40973733 |
| -0.4072874 | 4.99E-16     | 20.46137988 |
| -0.45      | -6.93E-32    | 20.5        |
| -4.94E-02  | -7.82E-03    | 13.30870162 |
| -5.64E-02  | -8.97E-03    | 13.96722209 |
| -6.41E-02  | -1.02E-02    | 14.59768667 |
| -7.25E-02  | -0.011629431 | 15.20216426 |
| -8.18E-02  | -1.32E-02    | 15.78169955 |
| -0.0920871 | -1.48E-02    | 16.33643881 |
| -0.103352  | -1.67E-02    | 16.86570931 |
| -0.1157434 | -1.87E-02    | 17.36807897 |
| -0.1293739 | -2.10E-02    | 17.84142074 |
| -0.1443674 | -2.34E-02    | 18.28300632 |
| -0.1608603 | -2.62E-02    | 18.68965492 |
| -0.1790025 | -2.91E-02    | 19.05796229 |
| -0.1989589 | -3.24E-02    | 19.38462948 |
| -0.2209109 | -3.60E-02    | 19.66689675 |
| -0.2450582 | -4.00E-02    | 19.90306106 |
| -0.2716201 | -4.44E-02    | 20.09301777 |
| -0.3008383 | -0.049177027 | 20.23872658 |
| -0.3329783 | -5.45E-02    | 20.34448477 |
| -0.3683323 | -6.03E-02    | 20.41694276 |
| -0.4072217 | -6.67E-02    | 20.46498427 |
| -0.45      | -7.37E-02    | 20.5        |

|            |              |             |
|------------|--------------|-------------|
| -4.76E-02  | -1.55E-02    | 13.30806783 |
| -5.46E-02  | -1.79E-02    | 13.99619657 |
| -6.23E-02  | -2.06E-02    | 14.65096912 |
| -7.08E-02  | -2.35E-02    | 15.2753481  |
| -8.02E-02  | -2.67E-02    | 15.8709402  |
| -9.05E-02  | -3.03E-02    | 16.43824035 |
| -0.1017672 | -3.42E-02    | 16.97677758 |
| -0.1142152 | -3.85E-02    | 17.48521905 |
| -0.127908  | -4.33E-02    | 17.9614712  |
| -0.1429701 | -4.85E-02    | 18.40281103 |
| -0.1595384 | -5.42E-02    | 18.80607793 |
| -0.1777635 | -6.05E-02    | 19.16795341 |
| -0.1978111 | -6.75E-02    | 19.48534665 |
| -0.2198635 | -7.51E-02    | 19.75588409 |
| -0.2441212 | -8.35E-02    | 19.97846725 |
| -0.2708046 | -9.27E-02    | 20.15381706 |
| -0.3001564 | -0.10290882  | 20.28487732 |
| -0.3324433 | -0.114087402 | 20.37693353 |
| -0.3679589 | -0.126383842 | 20.43735835 |
| -0.4070261 | -0.139909926 | 20.47506133 |
| -0.45      | -0.154788619 | 20.5        |
| -4.46E-02  | -2.27E-02    | 13.3081197  |
| -5.16E-02  | -2.66E-02    | 14.04955861 |
| -5.94E-02  | -3.08E-02    | 14.74740003 |
| -6.80E-02  | -3.55E-02    | 15.4064523  |
| -7.74E-02  | -4.06E-02    | 16.02946266 |

|            |              |             |
|------------|--------------|-------------|
| -8.78E-02  | -4.63E-02    | 16.61763266 |
| -9.92E-02  | -5.25E-02    | 17.17090597 |
| -0.11171   | -5.94E-02    | 17.68816732 |
| -0.125505  | -6.69E-02    | 18.16742545 |
| -0.1406794 | -7.52E-02    | 18.60602881 |
| -0.1573713 | -8.43E-02    | 19.00095168 |
| -0.1757324 | -9.43E-02    | 19.34917804 |
| -0.1959297 | -0.105315787 | 19.64819264 |
| -0.2181466 | -0.117440824 | 19.89655733 |
| -0.2425852 | -0.130778364 | 20.09450478 |
| -0.2694677 | -0.145449658 | 20.24442743 |
| -0.2990384 | -0.161588081 | 20.35109875 |
| -0.3315662 | -0.179340347 | 20.42147067 |
| -0.3673468 | -0.19886784  | 20.46398044 |
| -0.4067055 | -0.220348082 | 20.48747132 |
| -0.45      | -0.243976348 | 20.5        |
| -4.05E-02  | -2.94E-02    | 13.3090321  |
| -4.76E-02  | -3.48E-02    | 14.12872699 |
| -5.55E-02  | -4.09E-02    | 14.88803652 |
| -6.41E-02  | -4.75E-02    | 15.59513362 |
| -7.36E-02  | -5.47E-02    | 16.25482271 |
| -8.41E-02  | -0.062720133 | 16.86957761 |
| -9.56E-02  | -7.15E-02    | 17.44009897 |
| -0.1082896 | -8.12E-02    | 17.96570493 |
| -0.122224  | -9.18E-02    | 18.4446824  |
| -0.1375519 | -0.103526589 | 18.87466872 |

|            |              |             |
|------------|--------------|-------------|
| -0.1544126 | -0.116399834 | 19.25310707 |
| -0.1729593 | -0.130560404 | 19.57779466 |
| -0.1933608 | -0.146137031 | 19.84750831 |
| -0.2158023 | -0.163271321 | 20.06264471 |
| -0.2404881 | -0.182119039 | 20.22575741 |
| -0.2676423 | -0.202851529 | 20.34182736 |
| -0.2975121 | -0.225657269 | 20.41810088 |
| -0.3303688 | -0.250743582 | 20.46340107 |
| -0.3665111 | -0.278338527 | 20.48697537 |
| -0.4062677 | -0.308692966 | 20.49713011 |
| -0.45      | -0.342082849 | 20.5        |
| -3.54E-02  | -3.54E-02    | 13.31074378 |
| -0.0425949 | -4.26E-02    | 14.23316521 |
| -5.06E-02  | -0.050558373 | 15.07001869 |
| -5.93E-02  | -5.93E-02    | 15.83514482 |
| -6.90E-02  | -6.90E-02    | 16.53687455 |
| -7.96E-02  | -7.96E-02    | 17.17978587 |
| -9.12E-02  | -9.12E-02    | 17.76581318 |
| -0.1040381 | -0.104038095 | 18.29504466 |
| -0.1181459 | -0.118145911 | 18.76640168 |
| -0.1336645 | -0.133664508 | 19.17830706 |
| -0.150735  | -0.150734965 | 19.52938912 |
| -0.1695125 | -0.169512468 | 19.81921446 |
| -0.1901677 | -0.190167721 | 20.04898635 |
| -0.2128885 | -0.212888499 | 20.22209137 |
| -0.2378814 | -0.237881356 | 20.34434226 |

|            |              |             |
|------------|--------------|-------------|
| -0.2653735 | -0.265373497 | 20.42377445 |
| -0.2956149 | -0.295614853 | 20.46993224 |
| -0.3288803 | -0.328880345 | 20.49272773 |
| -0.3654724 | -0.365472386 | 20.50113267 |
| -0.4057236 | -0.405723631 | 20.50208696 |
| -0.45      | -0.45        | 20.5        |
| -2.94E-02  | -4.05E-02    | 13.31239745 |
| -3.48E-02  | -4.76E-02    | 14.1329087  |
| -4.09E-02  | -5.55E-02    | 14.89321389 |
| -4.75E-02  | -6.41E-02    | 15.60106435 |
| -0.0547269 | -7.36E-02    | 16.26124699 |
| -6.27E-02  | -8.41E-02    | 16.87624715 |
| -0.0715127 | -9.56E-02    | 17.44674431 |
| -8.12E-02  | -0.108289573 | 17.97201073 |
| -9.18E-02  | -0.122224019 | 18.45028787 |
| -0.1035266 | -0.137551911 | 18.879199   |
| -0.1163998 | -0.154412592 | 19.25623545 |
| -0.1305604 | -0.17295934  | 19.57932649 |
| -0.146137  | -0.193360764 | 19.84746485 |
| -0.1632713 | -0.21580233  | 20.06131286 |
| -0.182119  | -0.240488052 | 20.22366791 |
| -0.2028515 | -0.267642347 | 20.33963934 |
| -0.2256573 | -0.297512071 | 20.41640853 |
| -0.2507436 | -0.330368768 | 20.46252674 |
| -0.2783385 | -0.366511134 | 20.48684569 |
| -0.308693  | -0.406267737 | 20.4973212  |

|            |              |             |
|------------|--------------|-------------|
| -0.3420828 | -0.45        | 20.5        |
| -0.0226995 | -4.46E-02    | 13.31272111 |
| -2.66E-02  | -5.16E-02    | 14.05507095 |
| -3.08E-02  | -5.94E-02    | 14.7540889  |
| -3.55E-02  | -6.80E-02    | 15.4141662  |
| -4.06E-02  | -0.077403961 | 16.03795171 |
| -4.63E-02  | -8.78E-02    | 16.62662063 |
| -5.25E-02  | -9.92E-02    | 17.18008567 |
| -5.94E-02  | -0.111710002 | 17.69718197 |
| -6.69E-02  | -0.125504969 | 18.17586197 |
| -7.52E-02  | -0.140679432 | 18.61343603 |
| -8.43E-02  | -0.157371342 | 19.00688986 |
| -9.43E-02  | -0.175732442 | 19.3532985  |
| -0.1053158 | -0.195929653 | 19.65033388 |
| -0.1174408 | -0.218146585 | 19.89682977 |
| -0.1307784 | -0.24258521  | 20.09332404 |
| -0.1454497 | -0.269467698 | 20.24245817 |
| -0.1615881 | -0.299038434 | 20.34909511 |
| -0.1793403 | -0.331566244 | 20.42004627 |
| -0.1988678 | -0.367346835 | 20.46338858 |
| -0.2203481 | -0.406705485 | 20.48749112 |
| -0.2439763 | -0.45        | 20.5        |
| -1.55E-02  | -4.76E-02    | 13.31211084 |
| -1.79E-02  | -5.46E-02    | 14.00092639 |
| -0.0205597 | -6.23E-02    | 14.65661    |
| -2.35E-02  | -0.070810795 | 15.28184975 |

|            |              |             |
|------------|--------------|-------------|
| -2.67E-02  | -8.02E-02    | 15.87815086 |
| -3.03E-02  | -9.05E-02    | 16.44596523 |
| -3.42E-02  | -0.101767151 | 16.98478882 |
| -3.85E-02  | -0.11421516  | 17.4932495  |
| -4.33E-02  | -0.12790797  | 17.96920962 |
| -4.85E-02  | -0.142970061 | 18.40990954 |
| -5.42E-02  | -0.159538361 | 18.81217877 |
| -6.05E-02  | -0.177763492 | 19.17273755 |
| -6.75E-02  | -0.197811135 | 19.48859979 |
| -7.51E-02  | -0.219863542 | 19.75756593 |
| -8.35E-02  | -0.244121191 | 19.97875968 |
| -9.27E-02  | -0.270804604 | 20.15312231 |
| -0.1029088 | -0.300156358 | 20.28374524 |
| -0.1140874 | -0.332443288 | 20.37592064 |
| -0.1263838 | -0.367958911 | 20.43684958 |
| -0.1399099 | -0.407026096 | 20.47508559 |
| -0.1547886 | -0.45        | 20.5        |
| -7.82E-03  | -4.94E-02    | 13.31100955 |
| -8.97E-03  | -0.056379015 | 13.96987078 |
| -1.02E-02  | -6.41E-02    | 14.6008003  |
| -1.16E-02  | -7.25E-02    | 15.20573798 |
| -1.32E-02  | -0.081846345 | 15.78567019 |
| -1.48E-02  | -9.21E-02    | 16.3407143  |
| -1.67E-02  | -0.103352005 | 16.87017685 |
| -1.87E-02  | -0.115743362 | 17.37260436 |
| -2.10E-02  | -0.129373854 | 17.84584668 |



|            |              |             |
|------------|--------------|-------------|
| -2.34E-02  | -0.144367396 | 18.287155   |
| -2.62E-02  | -0.160860291 | 18.69333884 |
| -2.91E-02  | -0.179002477 | 19.06100525 |
| -3.24E-02  | -0.19895888  | 19.38689708 |
| -3.60E-02  | -0.220910924 | 19.66833107 |
| -0.0400032 | -0.245058173 | 19.90370977 |
| -4.44E-02  | -0.271620146 | 20.09304412 |
| -4.92E-02  | -0.300838317 | 20.2383886  |
| -5.45E-02  | -0.332978305 | 20.34408005 |
| -0.0602774 | -0.368332291 | 20.4167241  |
| -6.67E-02  | -0.407221676 | 20.46503922 |
| -7.37E-02  | -0.45        | 20.5        |
| -7.03E-15  | -0.05        | 13.30977482 |
| -6.90E-15  | -5.70E-02    | 13.95942454 |
| -6.77E-15  | -6.47E-02    | 14.58261411 |
| -6.62E-15  | -7.31E-02    | 15.18111975 |
| -6.46E-15  | -0.082412047 | 15.755805   |
| -6.28E-15  | -9.26E-02    | 16.30670512 |
| -6.08E-15  | -0.103884662 | 16.83308214 |
| -5.86E-15  | -0.116256978 | 17.33346935 |
| -5.62E-15  | -0.129866526 | 17.80572498 |
| -5.36E-15  | -0.144837029 | 18.24711682 |
| -5.07E-15  | -0.161304581 | 18.65446147 |
| -4.75E-15  | -0.179418889 | 19.02434207 |
| -4.40E-15  | -0.199344628 | 19.35342339 |
| -4.02E-15  | -0.221262941 | 19.63886992 |

|            |              |             |
|------------|--------------|-------------|
| -3.59E-15  | -0.245373085 | 19.87884777 |
| -3.13E-15  | -0.271894243 | 20.0730563  |
| -2.62E-15  | -0.301067518 | 20.22319881 |
| -2.05E-15  | -0.333158119 | 20.33328812 |
| -1.43E-15  | -0.368457781 | 20.40973733 |
| -7.50E-16  | -0.407287409 | 20.46137988 |
| 3.46E-31   | -0.45        | 20.5        |
| 7.82E-03   | -0.049384417 | 13.30870162 |
| 8.97E-03   | -5.64E-02    | 13.96722209 |
| 0.01023749 | -6.41E-02    | 14.59768667 |
| 1.16E-02   | -7.25E-02    | 15.20216426 |
| 1.32E-02   | -0.081846345 | 15.78169955 |
| 1.48E-02   | -9.21E-02    | 16.33643881 |
| 1.67E-02   | -0.103352005 | 16.86570931 |
| 1.87E-02   | -0.115743362 | 17.36807897 |
| 2.10E-02   | -0.129373854 | 17.84142074 |
| 2.34E-02   | -0.144367396 | 18.28300632 |
| 2.62E-02   | -0.160860291 | 18.68965492 |
| 2.91E-02   | -0.179002477 | 19.05796229 |
| 3.24E-02   | -0.19895888  | 19.38462948 |
| 3.60E-02   | -0.220910924 | 19.66689675 |
| 0.04000316 | -0.245058173 | 19.90306106 |
| 4.44E-02   | -0.271620146 | 20.09301777 |
| 4.92E-02   | -0.300838317 | 20.23872658 |
| 5.45E-02   | -0.332978305 | 20.34448477 |
| 6.03E-02   | -0.368332291 | 20.41694276 |

|            |              |             |
|------------|--------------|-------------|
| 6.67E-02   | -0.407221676 | 20.46498427 |
| 7.37E-02   | -0.45        | 20.5        |
| 1.55E-02   | -0.047552826 | 13.30806783 |
| 1.79E-02   | -5.46E-02    | 13.99619657 |
| 2.06E-02   | -6.23E-02    | 14.65096912 |
| 2.35E-02   | -7.08E-02    | 15.2753481  |
| 2.67E-02   | -8.02E-02    | 15.8709402  |
| 3.03E-02   | -9.05E-02    | 16.43824035 |
| 3.42E-02   | -0.101767151 | 16.97677758 |
| 3.85E-02   | -0.11421516  | 17.48521905 |
| 4.33E-02   | -0.12790797  | 17.9614712  |
| 4.85E-02   | -0.142970061 | 18.40281103 |
| 5.42E-02   | -0.159538361 | 18.80607793 |
| 6.05E-02   | -0.177763492 | 19.16795341 |
| 6.75E-02   | -0.197811135 | 19.48534665 |
| 7.51E-02   | -0.219863542 | 19.75588409 |
| 8.35E-02   | -0.244121191 | 19.97846725 |
| 9.27E-02   | -0.270804604 | 20.15381706 |
| 0.10290882 | -0.300156358 | 20.28487732 |
| 0.1140874  | -0.332443288 | 20.37693353 |
| 0.12638384 | -0.367958911 | 20.43735835 |
| 0.13990993 | -0.407026096 | 20.47506133 |
| 0.15478862 | -0.45        | 20.5        |
| 2.27E-02   | -4.46E-02    | 13.3081197  |
| 2.66E-02   | -5.16E-02    | 14.04955861 |
| 3.08E-02   | -5.94E-02    | 14.74740003 |

|            |              |             |
|------------|--------------|-------------|
| 3.55E-02   | -6.80E-02    | 15.4064523  |
| 0.04062961 | -7.74E-02    | 16.02946266 |
| 4.63E-02   | -8.78E-02    | 16.61763266 |
| 5.25E-02   | -0.099169123 | 17.17090597 |
| 5.94E-02   | -0.111710002 | 17.68816732 |
| 6.69E-02   | -0.125504969 | 18.16742545 |
| 7.52E-02   | -0.140679432 | 18.60602881 |
| 8.43E-02   | -0.157371342 | 19.00095168 |
| 9.43E-02   | -0.175732442 | 19.34917804 |
| 0.10531579 | -0.195929653 | 19.64819264 |
| 0.11744082 | -0.218146585 | 19.89655733 |
| 0.13077836 | -0.24258521  | 20.09450478 |
| 0.14544966 | -0.269467698 | 20.24442743 |
| 0.16158808 | -0.299038434 | 20.35109875 |
| 0.17934035 | -0.331566244 | 20.42147067 |
| 0.19886784 | -0.367346835 | 20.46398044 |
| 0.22034808 | -0.406705485 | 20.48747132 |
| 0.24397635 | -0.45        | 20.5        |
| 2.94E-02   | -0.04045085  | 13.3090321  |
| 3.48E-02   | -4.76E-02    | 14.12872699 |
| 4.09E-02   | -5.55E-02    | 14.88803652 |
| 4.75E-02   | -6.41E-02    | 15.59513362 |
| 5.47E-02   | -7.36E-02    | 16.25482271 |
| 6.27E-02   | -0.084105822 | 16.86957761 |
| 7.15E-02   | -9.56E-02    | 17.44009897 |
| 0.08118459 | -0.108289573 | 17.96570493 |

|            |              |             |
|------------|--------------|-------------|
| 9.18E-02   | -0.122224019 | 18.4446824  |
| 0.10352659 | -0.137551911 | 18.87466872 |
| 0.11639983 | -0.154412592 | 19.25310707 |
| 0.1305604  | -0.17295934  | 19.57779466 |
| 0.14613703 | -0.193360764 | 19.84750831 |
| 0.16327132 | -0.21580233  | 20.06264471 |
| 0.18211904 | -0.240488052 | 20.22575741 |
| 0.20285153 | -0.267642347 | 20.34182736 |
| 0.22565727 | -0.297512071 | 20.41810088 |
| 0.25074358 | -0.330368768 | 20.46340107 |
| 0.27833853 | -0.366511134 | 20.48697537 |
| 0.30869297 | -0.406267737 | 20.49713011 |
| 0.34208285 | -0.45        | 20.5        |
| 3.54E-02   | -3.54E-02    | 13.31074378 |
| 4.26E-02   | -4.26E-02    | 14.23316521 |
| 5.06E-02   | -5.06E-02    | 15.07001869 |
| 5.93E-02   | -5.93E-02    | 15.83514482 |
| 6.90E-02   | -6.90E-02    | 16.53687455 |
| 7.96E-02   | -7.96E-02    | 17.17978587 |
| 0.09121281 | -0.091212808 | 17.76581318 |
| 0.10403809 | -0.104038095 | 18.29504466 |
| 0.11814591 | -0.118145911 | 18.76640168 |
| 0.13366451 | -0.133664508 | 19.17830706 |
| 0.15073497 | -0.150734965 | 19.52938912 |
| 0.16951247 | -0.169512468 | 19.81921446 |
| 0.19016772 | -0.190167721 | 20.04898635 |

|            |              |             |
|------------|--------------|-------------|
| 0.2128885  | -0.212888499 | 20.22209137 |
| 0.23788136 | -0.237881356 | 20.34434226 |
| 0.2653735  | -0.265373497 | 20.42377445 |
| 0.29561485 | -0.295614853 | 20.46993224 |
| 0.32888034 | -0.328880345 | 20.49272773 |
| 0.36547239 | -0.365472386 | 20.50113267 |
| 0.40572363 | -0.405723631 | 20.50208696 |
| 0.45       | -0.45        | 20.5        |
| 4.05E-02   | -2.94E-02    | 13.31239745 |
| 4.76E-02   | -3.48E-02    | 14.1329087  |
| 5.55E-02   | -4.09E-02    | 14.89321389 |
| 6.41E-02   | -4.75E-02    | 15.60106435 |
| 7.36E-02   | -5.47E-02    | 16.26124699 |
| 8.41E-02   | -6.27E-02    | 16.87624715 |
| 9.56E-02   | -7.15E-02    | 17.44674431 |
| 0.10828957 | -0.081184593 | 17.97201073 |
| 0.12222402 | -9.18E-02    | 18.45028787 |
| 0.13755191 | -0.103526589 | 18.879199   |
| 0.15441259 | -0.116399834 | 19.25623545 |
| 0.17295934 | -0.130560404 | 19.57932649 |
| 0.19336076 | -0.146137031 | 19.84746485 |
| 0.21580233 | -0.163271321 | 20.06131286 |
| 0.24048805 | -0.182119039 | 20.22366791 |
| 0.26764235 | -0.202851529 | 20.33963934 |
| 0.29751207 | -0.225657269 | 20.41640853 |
| 0.33036877 | -0.250743582 | 20.46252674 |

|            |              |             |
|------------|--------------|-------------|
| 0.36651113 | -0.278338527 | 20.48684569 |
| 0.40626774 | -0.308692966 | 20.4973212  |
| 0.45       | -0.342082849 | 20.5        |
| 4.46E-02   | -0.022699525 | 13.31272111 |
| 5.16E-02   | -2.66E-02    | 14.05507095 |
| 5.94E-02   | -3.08E-02    | 14.7540889  |
| 6.80E-02   | -3.55E-02    | 15.4141662  |
| 7.74E-02   | -4.06E-02    | 16.03795171 |
| 8.78E-02   | -4.63E-02    | 16.62662063 |
| 9.92E-02   | -5.25E-02    | 17.18008567 |
| 0.11171    | -0.059352359 | 17.69718197 |
| 0.12550497 | -6.69E-02    | 18.17586197 |
| 0.14067943 | -7.52E-02    | 18.61343603 |
| 0.15737134 | -8.43E-02    | 19.00688986 |
| 0.17573244 | -9.43E-02    | 19.3532985  |
| 0.19592965 | -0.105315787 | 19.65033388 |
| 0.21814659 | -0.117440824 | 19.89682977 |
| 0.24258521 | -0.130778364 | 20.09332404 |
| 0.2694677  | -0.145449658 | 20.24245817 |
| 0.29903843 | -0.161588081 | 20.34909511 |
| 0.33156624 | -0.179340347 | 20.42004627 |
| 0.36734683 | -0.19886784  | 20.46338858 |
| 0.40670548 | -0.220348082 | 20.48749112 |
| 0.45       | -0.243976348 | 20.5        |
| 4.76E-02   | -1.55E-02    | 13.31211084 |
| 5.46E-02   | -1.79E-02    | 14.00092639 |

|            |              |             |
|------------|--------------|-------------|
| 0.06230864 | -2.06E-02    | 14.65661    |
| 7.08E-02   | -0.023503369 | 15.28184975 |
| 8.02E-02   | -0.026741406 | 15.87815086 |
| 9.05E-02   | -3.03E-02    | 16.44596523 |
| 0.10176715 | -3.42E-02    | 16.98478882 |
| 0.11421516 | -3.85E-02    | 17.4932495  |
| 0.12790797 | -4.33E-02    | 17.96920962 |
| 0.14297006 | -4.85E-02    | 18.40990954 |
| 0.15953836 | -5.42E-02    | 18.81217877 |
| 0.17776349 | -6.05E-02    | 19.17273755 |
| 0.19781113 | -6.75E-02    | 19.48859979 |
| 0.21986354 | -7.51E-02    | 19.75756593 |
| 0.24412119 | -8.35E-02    | 19.97875968 |
| 0.2708046  | -9.27E-02    | 20.15312231 |
| 0.30015636 | -0.10290882  | 20.28374524 |
| 0.33244329 | -0.114087402 | 20.37592064 |
| 0.36795891 | -0.126383842 | 20.43684958 |
| 0.4070261  | -0.139909926 | 20.47508559 |
| 0.45       | -0.154788619 | 20.5        |
| 4.94E-02   | -7.82E-03    | 13.31100955 |
| 5.64E-02   | -8.97E-03    | 13.96987078 |
| 6.41E-02   | -1.02E-02    | 14.6008003  |
| 7.25E-02   | -0.011629431 | 15.20573798 |
| 8.18E-02   | -1.32E-02    | 15.78567019 |
| 0.09208714 | -1.48E-02    | 16.3407143  |
| 0.10335201 | -1.67E-02    | 16.87017685 |



|            |              |             |
|------------|--------------|-------------|
| 0.11574336 | -1.87E-02    | 17.37260436 |
| 0.12937385 | -2.10E-02    | 17.84584668 |
| 0.1443674  | -2.34E-02    | 18.287155   |
| 0.16086029 | -2.62E-02    | 18.69333884 |
| 0.17900248 | -2.91E-02    | 19.06100525 |
| 0.19895888 | -3.24E-02    | 19.38689708 |
| 0.22091092 | -3.60E-02    | 19.66833107 |
| 0.24505817 | -4.00E-02    | 19.90370977 |
| 0.27162015 | -0.044371668 | 20.09304412 |
| 0.30083832 | -4.92E-02    | 20.2383886  |
| 0.3329783  | -5.45E-02    | 20.34408005 |
| 0.36833229 | -6.03E-02    | 20.4167241  |
| 0.40722168 | -6.67E-02    | 20.46503922 |
| 0.45       | -7.37E-02    | 20.5        |
| 1          | 2            | 22          |
| 2          | 23           | 22          |
| 2          | 3            | 23          |
| 3          | 24           | 23          |
| 3          | 4            | 24          |
| 4          | 25           | 24          |
| 4          | 5            | 25          |
| 5          | 26           | 25          |
| 5          | 6            | 26          |
| 6          | 27           | 26          |
| 6          | 7            | 27          |
| 7          | 28           | 27          |

|    |    |    |
|----|----|----|
| 7  | 8  | 28 |
| 8  | 29 | 28 |
| 8  | 9  | 29 |
| 9  | 30 | 29 |
| 9  | 10 | 30 |
| 10 | 31 | 30 |
| 10 | 11 | 31 |
| 11 | 32 | 31 |
| 11 | 12 | 32 |
| 12 | 33 | 32 |
| 12 | 13 | 33 |
| 13 | 34 | 33 |
| 13 | 14 | 34 |
| 14 | 35 | 34 |
| 14 | 15 | 35 |
| 15 | 36 | 35 |
| 15 | 16 | 36 |
| 16 | 37 | 36 |
| 16 | 17 | 37 |
| 17 | 38 | 37 |
| 17 | 18 | 38 |
| 18 | 39 | 38 |
| 18 | 19 | 39 |
| 19 | 40 | 39 |
| 19 | 20 | 40 |
| 20 | 41 | 40 |

|    |    |    |
|----|----|----|
| 20 | 21 | 41 |
| 21 | 42 | 41 |
| 22 | 23 | 43 |
| 23 | 44 | 43 |
| 23 | 24 | 44 |
| 24 | 45 | 44 |
| 24 | 25 | 45 |
| 25 | 46 | 45 |
| 25 | 26 | 46 |
| 26 | 47 | 46 |
| 26 | 27 | 47 |
| 27 | 48 | 47 |
| 27 | 28 | 48 |
| 28 | 49 | 48 |
| 28 | 29 | 49 |
| 29 | 50 | 49 |
| 29 | 30 | 50 |
| 30 | 51 | 50 |
| 30 | 31 | 51 |
| 31 | 52 | 51 |
| 31 | 32 | 52 |
| 32 | 53 | 52 |
| 32 | 33 | 53 |
| 33 | 54 | 53 |
| 33 | 34 | 54 |
| 34 | 55 | 54 |

|    |    |    |
|----|----|----|
| 34 | 35 | 55 |
| 35 | 56 | 55 |
| 35 | 36 | 56 |
| 36 | 57 | 56 |
| 36 | 37 | 57 |
| 37 | 58 | 57 |
| 37 | 38 | 58 |
| 38 | 59 | 58 |
| 38 | 39 | 59 |
| 39 | 60 | 59 |
| 39 | 40 | 60 |
| 40 | 61 | 60 |
| 40 | 41 | 61 |
| 41 | 62 | 61 |
| 41 | 42 | 62 |
| 42 | 63 | 62 |
| 43 | 44 | 64 |
| 44 | 65 | 64 |
| 44 | 45 | 65 |
| 45 | 66 | 65 |
| 45 | 46 | 66 |
| 46 | 67 | 66 |
| 46 | 47 | 67 |
| 47 | 68 | 67 |
| 47 | 48 | 68 |
| 48 | 69 | 68 |

|    |    |    |
|----|----|----|
| 48 | 49 | 69 |
| 49 | 70 | 69 |
| 49 | 50 | 70 |
| 50 | 71 | 70 |
| 50 | 51 | 71 |
| 51 | 72 | 71 |
| 51 | 52 | 72 |
| 52 | 73 | 72 |
| 52 | 53 | 73 |
| 53 | 74 | 73 |
| 53 | 54 | 74 |
| 54 | 75 | 74 |
| 54 | 55 | 75 |
| 55 | 76 | 75 |
| 55 | 56 | 76 |
| 56 | 77 | 76 |
| 56 | 57 | 77 |
| 57 | 78 | 77 |
| 57 | 58 | 78 |
| 58 | 79 | 78 |
| 58 | 59 | 79 |
| 59 | 80 | 79 |
| 59 | 60 | 80 |
| 60 | 81 | 80 |
| 60 | 61 | 81 |
| 61 | 82 | 81 |

|    |    |    |
|----|----|----|
| 61 | 62 | 82 |
| 62 | 83 | 82 |
| 62 | 63 | 83 |
| 63 | 84 | 83 |
| 64 | 65 | 85 |
| 65 | 86 | 85 |
| 65 | 66 | 86 |
| 66 | 87 | 86 |
| 66 | 67 | 87 |
| 67 | 88 | 87 |
| 67 | 68 | 88 |
| 68 | 89 | 88 |
| 68 | 69 | 89 |
| 69 | 90 | 89 |
| 69 | 70 | 90 |
| 70 | 91 | 90 |
| 70 | 71 | 91 |
| 71 | 92 | 91 |
| 71 | 72 | 92 |
| 72 | 93 | 92 |
| 72 | 73 | 93 |
| 73 | 94 | 93 |
| 73 | 74 | 94 |
| 74 | 95 | 94 |
| 74 | 75 | 95 |
| 75 | 96 | 95 |

|    |     |     |
|----|-----|-----|
| 75 | 76  | 96  |
| 76 | 97  | 96  |
| 76 | 77  | 97  |
| 77 | 98  | 97  |
| 77 | 78  | 98  |
| 78 | 99  | 98  |
| 78 | 79  | 99  |
| 79 | 100 | 99  |
| 79 | 80  | 100 |
| 80 | 101 | 100 |
| 80 | 81  | 101 |
| 81 | 102 | 101 |
| 81 | 82  | 102 |
| 82 | 103 | 102 |
| 82 | 83  | 103 |
| 83 | 104 | 103 |
| 83 | 84  | 104 |
| 84 | 105 | 104 |
| 85 | 86  | 106 |
| 86 | 107 | 106 |
| 86 | 87  | 107 |
| 87 | 108 | 107 |
| 87 | 88  | 108 |
| 88 | 109 | 108 |
| 88 | 89  | 109 |
| 89 | 110 | 109 |

|     |     |     |
|-----|-----|-----|
| 89  | 90  | 110 |
| 90  | 111 | 110 |
| 90  | 91  | 111 |
| 91  | 112 | 111 |
| 91  | 92  | 112 |
| 92  | 113 | 112 |
| 92  | 93  | 113 |
| 93  | 114 | 113 |
| 93  | 94  | 114 |
| 94  | 115 | 114 |
| 94  | 95  | 115 |
| 95  | 116 | 115 |
| 95  | 96  | 116 |
| 96  | 117 | 116 |
| 96  | 97  | 117 |
| 97  | 118 | 117 |
| 97  | 98  | 118 |
| 98  | 119 | 118 |
| 98  | 99  | 119 |
| 99  | 120 | 119 |
| 99  | 100 | 120 |
| 100 | 121 | 120 |
| 100 | 101 | 121 |
| 101 | 122 | 121 |
| 101 | 102 | 122 |
| 102 | 123 | 122 |



|     |     |     |
|-----|-----|-----|
| 102 | 103 | 123 |
| 103 | 124 | 123 |
| 103 | 104 | 124 |
| 104 | 125 | 124 |
| 104 | 105 | 125 |
| 105 | 126 | 125 |
| 106 | 107 | 127 |
| 107 | 128 | 127 |
| 107 | 108 | 128 |
| 108 | 129 | 128 |
| 108 | 109 | 129 |
| 109 | 130 | 129 |
| 109 | 110 | 130 |
| 110 | 131 | 130 |
| 110 | 111 | 131 |
| 111 | 132 | 131 |
| 111 | 112 | 132 |
| 112 | 133 | 132 |
| 112 | 113 | 133 |
| 113 | 134 | 133 |
| 113 | 114 | 134 |
| 114 | 135 | 134 |
| 114 | 115 | 135 |
| 115 | 136 | 135 |
| 115 | 116 | 136 |
| 116 | 137 | 136 |

|     |     |     |
|-----|-----|-----|
| 116 | 117 | 137 |
| 117 | 138 | 137 |
| 117 | 118 | 138 |
| 118 | 139 | 138 |
| 118 | 119 | 139 |
| 119 | 140 | 139 |
| 119 | 120 | 140 |
| 120 | 141 | 140 |
| 120 | 121 | 141 |
| 121 | 142 | 141 |
| 121 | 122 | 142 |
| 122 | 143 | 142 |
| 122 | 123 | 143 |
| 123 | 144 | 143 |
| 123 | 124 | 144 |
| 124 | 145 | 144 |
| 124 | 125 | 145 |
| 125 | 146 | 145 |
| 125 | 126 | 146 |
| 126 | 147 | 146 |
| 127 | 128 | 148 |
| 128 | 149 | 148 |
| 128 | 129 | 149 |
| 129 | 150 | 149 |
| 129 | 130 | 150 |
| 130 | 151 | 150 |

|     |     |     |
|-----|-----|-----|
| 130 | 131 | 151 |
| 131 | 152 | 151 |
| 131 | 132 | 152 |
| 132 | 153 | 152 |
| 132 | 133 | 153 |
| 133 | 154 | 153 |
| 133 | 134 | 154 |
| 134 | 155 | 154 |
| 134 | 135 | 155 |
| 135 | 156 | 155 |
| 135 | 136 | 156 |
| 136 | 157 | 156 |
| 136 | 137 | 157 |
| 137 | 158 | 157 |
| 137 | 138 | 158 |
| 138 | 159 | 158 |
| 138 | 139 | 159 |
| 139 | 160 | 159 |
| 139 | 140 | 160 |
| 140 | 161 | 160 |
| 140 | 141 | 161 |
| 141 | 162 | 161 |
| 141 | 142 | 162 |
| 142 | 163 | 162 |
| 142 | 143 | 163 |
| 143 | 164 | 163 |

|     |     |     |
|-----|-----|-----|
| 143 | 144 | 164 |
| 144 | 165 | 164 |
| 144 | 145 | 165 |
| 145 | 166 | 165 |
| 145 | 146 | 166 |
| 146 | 167 | 166 |
| 146 | 147 | 167 |
| 147 | 168 | 167 |
| 148 | 149 | 169 |
| 149 | 170 | 169 |
| 149 | 150 | 170 |
| 150 | 171 | 170 |
| 150 | 151 | 171 |
| 151 | 172 | 171 |
| 151 | 152 | 172 |
| 152 | 173 | 172 |
| 152 | 153 | 173 |
| 153 | 174 | 173 |
| 153 | 154 | 174 |
| 154 | 175 | 174 |
| 154 | 155 | 175 |
| 155 | 176 | 175 |
| 155 | 156 | 176 |
| 156 | 177 | 176 |
| 156 | 157 | 177 |
| 157 | 178 | 177 |

|     |     |     |
|-----|-----|-----|
| 157 | 158 | 178 |
| 158 | 179 | 178 |
| 158 | 159 | 179 |
| 159 | 180 | 179 |
| 159 | 160 | 180 |
| 160 | 181 | 180 |
| 160 | 161 | 181 |
| 161 | 182 | 181 |
| 161 | 162 | 182 |
| 162 | 183 | 182 |
| 162 | 163 | 183 |
| 163 | 184 | 183 |
| 163 | 164 | 184 |
| 164 | 185 | 184 |
| 164 | 165 | 185 |
| 165 | 186 | 185 |
| 165 | 166 | 186 |
| 166 | 187 | 186 |
| 166 | 167 | 187 |
| 167 | 188 | 187 |
| 167 | 168 | 188 |
| 168 | 189 | 188 |
| 169 | 170 | 190 |
| 170 | 191 | 190 |
| 170 | 171 | 191 |
| 171 | 192 | 191 |

|     |     |     |
|-----|-----|-----|
| 171 | 172 | 192 |
| 172 | 193 | 192 |
| 172 | 173 | 193 |
| 173 | 194 | 193 |
| 173 | 174 | 194 |
| 174 | 195 | 194 |
| 174 | 175 | 195 |
| 175 | 196 | 195 |
| 175 | 176 | 196 |
| 176 | 197 | 196 |
| 176 | 177 | 197 |
| 177 | 198 | 197 |
| 177 | 178 | 198 |
| 178 | 199 | 198 |
| 178 | 179 | 199 |
| 179 | 200 | 199 |
| 179 | 180 | 200 |
| 180 | 201 | 200 |
| 180 | 181 | 201 |
| 181 | 202 | 201 |
| 181 | 182 | 202 |
| 182 | 203 | 202 |
| 182 | 183 | 203 |
| 183 | 204 | 203 |
| 183 | 184 | 204 |
| 184 | 205 | 204 |

|     |     |     |
|-----|-----|-----|
| 184 | 185 | 205 |
| 185 | 206 | 205 |
| 185 | 186 | 206 |
| 186 | 207 | 206 |
| 186 | 187 | 207 |
| 187 | 208 | 207 |
| 187 | 188 | 208 |
| 188 | 209 | 208 |
| 188 | 189 | 209 |
| 189 | 210 | 209 |
| 190 | 191 | 211 |
| 191 | 212 | 211 |
| 191 | 192 | 212 |
| 192 | 213 | 212 |
| 192 | 193 | 213 |
| 193 | 214 | 213 |
| 193 | 194 | 214 |
| 194 | 215 | 214 |
| 194 | 195 | 215 |
| 195 | 216 | 215 |
| 195 | 196 | 216 |
| 196 | 217 | 216 |
| 196 | 197 | 217 |
| 197 | 218 | 217 |
| 197 | 198 | 218 |
| 198 | 219 | 218 |

|     |     |     |
|-----|-----|-----|
| 198 | 199 | 219 |
| 199 | 220 | 219 |
| 199 | 200 | 220 |
| 200 | 221 | 220 |
| 200 | 201 | 221 |
| 201 | 222 | 221 |
| 201 | 202 | 222 |
| 202 | 223 | 222 |
| 202 | 203 | 223 |
| 203 | 224 | 223 |
| 203 | 204 | 224 |
| 204 | 225 | 224 |
| 204 | 205 | 225 |
| 205 | 226 | 225 |
| 205 | 206 | 226 |
| 206 | 227 | 226 |
| 206 | 207 | 227 |
| 207 | 228 | 227 |
| 207 | 208 | 228 |
| 208 | 229 | 228 |
| 208 | 209 | 229 |
| 209 | 230 | 229 |
| 209 | 210 | 230 |
| 210 | 231 | 230 |
| 211 | 212 | 232 |
| 212 | 233 | 232 |



|     |     |     |
|-----|-----|-----|
| 212 | 213 | 233 |
| 213 | 234 | 233 |
| 213 | 214 | 234 |
| 214 | 235 | 234 |
| 214 | 215 | 235 |
| 215 | 236 | 235 |
| 215 | 216 | 236 |
| 216 | 237 | 236 |
| 216 | 217 | 237 |
| 217 | 238 | 237 |
| 217 | 218 | 238 |
| 218 | 239 | 238 |
| 218 | 219 | 239 |
| 219 | 240 | 239 |
| 219 | 220 | 240 |
| 220 | 241 | 240 |
| 220 | 221 | 241 |
| 221 | 242 | 241 |
| 221 | 222 | 242 |
| 222 | 243 | 242 |
| 222 | 223 | 243 |
| 223 | 244 | 243 |
| 223 | 224 | 244 |
| 224 | 245 | 244 |
| 224 | 225 | 245 |
| 225 | 246 | 245 |

|     |     |     |
|-----|-----|-----|
| 225 | 226 | 246 |
| 226 | 247 | 246 |
| 226 | 227 | 247 |
| 227 | 248 | 247 |
| 227 | 228 | 248 |
| 228 | 249 | 248 |
| 228 | 229 | 249 |
| 229 | 250 | 249 |
| 229 | 230 | 250 |
| 230 | 251 | 250 |
| 230 | 231 | 251 |
| 231 | 252 | 251 |
| 232 | 233 | 253 |
| 233 | 254 | 253 |
| 233 | 234 | 254 |
| 234 | 255 | 254 |
| 234 | 235 | 255 |
| 235 | 256 | 255 |
| 235 | 236 | 256 |
| 236 | 257 | 256 |
| 236 | 237 | 257 |
| 237 | 258 | 257 |
| 237 | 238 | 258 |
| 238 | 259 | 258 |
| 238 | 239 | 259 |
| 239 | 260 | 259 |

|     |     |     |
|-----|-----|-----|
| 239 | 240 | 260 |
| 240 | 261 | 260 |
| 240 | 241 | 261 |
| 241 | 262 | 261 |
| 241 | 242 | 262 |
| 242 | 263 | 262 |
| 242 | 243 | 263 |
| 243 | 264 | 263 |
| 243 | 244 | 264 |
| 244 | 265 | 264 |
| 244 | 245 | 265 |
| 245 | 266 | 265 |
| 245 | 246 | 266 |
| 246 | 267 | 266 |
| 246 | 247 | 267 |
| 247 | 268 | 267 |
| 247 | 248 | 268 |
| 248 | 269 | 268 |
| 248 | 249 | 269 |
| 249 | 270 | 269 |
| 249 | 250 | 270 |
| 250 | 271 | 270 |
| 250 | 251 | 271 |
| 251 | 272 | 271 |
| 251 | 252 | 272 |
| 252 | 273 | 272 |

|     |     |     |
|-----|-----|-----|
| 253 | 254 | 274 |
| 254 | 275 | 274 |
| 254 | 255 | 275 |
| 255 | 276 | 275 |
| 255 | 256 | 276 |
| 256 | 277 | 276 |
| 256 | 257 | 277 |
| 257 | 278 | 277 |
| 257 | 258 | 278 |
| 258 | 279 | 278 |
| 258 | 259 | 279 |
| 259 | 280 | 279 |
| 259 | 260 | 280 |
| 260 | 281 | 280 |
| 260 | 261 | 281 |
| 261 | 282 | 281 |
| 261 | 262 | 282 |
| 262 | 283 | 282 |
| 262 | 263 | 283 |
| 263 | 284 | 283 |
| 263 | 264 | 284 |
| 264 | 285 | 284 |
| 264 | 265 | 285 |
| 265 | 286 | 285 |
| 265 | 266 | 286 |
| 266 | 287 | 286 |

|     |     |     |
|-----|-----|-----|
| 266 | 267 | 287 |
| 267 | 288 | 287 |
| 267 | 268 | 288 |
| 268 | 289 | 288 |
| 268 | 269 | 289 |
| 269 | 290 | 289 |
| 269 | 270 | 290 |
| 270 | 291 | 290 |
| 270 | 271 | 291 |
| 271 | 292 | 291 |
| 271 | 272 | 292 |
| 272 | 293 | 292 |
| 272 | 273 | 293 |
| 273 | 294 | 293 |
| 274 | 275 | 295 |
| 275 | 296 | 295 |
| 275 | 276 | 296 |
| 276 | 297 | 296 |
| 276 | 277 | 297 |
| 277 | 298 | 297 |
| 277 | 278 | 298 |
| 278 | 299 | 298 |
| 278 | 279 | 299 |
| 279 | 300 | 299 |
| 279 | 280 | 300 |
| 280 | 301 | 300 |

|     |     |     |
|-----|-----|-----|
| 280 | 281 | 301 |
| 281 | 302 | 301 |
| 281 | 282 | 302 |
| 282 | 303 | 302 |
| 282 | 283 | 303 |
| 283 | 304 | 303 |
| 283 | 284 | 304 |
| 284 | 305 | 304 |
| 284 | 285 | 305 |
| 285 | 306 | 305 |
| 285 | 286 | 306 |
| 286 | 307 | 306 |
| 286 | 287 | 307 |
| 287 | 308 | 307 |
| 287 | 288 | 308 |
| 288 | 309 | 308 |
| 288 | 289 | 309 |
| 289 | 310 | 309 |
| 289 | 290 | 310 |
| 290 | 311 | 310 |
| 290 | 291 | 311 |
| 291 | 312 | 311 |
| 291 | 292 | 312 |
| 292 | 313 | 312 |
| 292 | 293 | 313 |
| 293 | 314 | 313 |

|     |     |     |
|-----|-----|-----|
| 293 | 294 | 314 |
| 294 | 315 | 314 |
| 295 | 296 | 316 |
| 296 | 317 | 316 |
| 296 | 297 | 317 |
| 297 | 318 | 317 |
| 297 | 298 | 318 |
| 298 | 319 | 318 |
| 298 | 299 | 319 |
| 299 | 320 | 319 |
| 299 | 300 | 320 |
| 300 | 321 | 320 |
| 300 | 301 | 321 |
| 301 | 322 | 321 |
| 301 | 302 | 322 |
| 302 | 323 | 322 |
| 302 | 303 | 323 |
| 303 | 324 | 323 |
| 303 | 304 | 324 |
| 304 | 325 | 324 |
| 304 | 305 | 325 |
| 305 | 326 | 325 |
| 305 | 306 | 326 |
| 306 | 327 | 326 |
| 306 | 307 | 327 |
| 307 | 328 | 327 |

|     |     |     |
|-----|-----|-----|
| 307 | 308 | 328 |
| 308 | 329 | 328 |
| 308 | 309 | 329 |
| 309 | 330 | 329 |
| 309 | 310 | 330 |
| 310 | 331 | 330 |
| 310 | 311 | 331 |
| 311 | 332 | 331 |
| 311 | 312 | 332 |
| 312 | 333 | 332 |
| 312 | 313 | 333 |
| 313 | 334 | 333 |
| 313 | 314 | 334 |
| 314 | 335 | 334 |
| 314 | 315 | 335 |
| 315 | 336 | 335 |
| 316 | 317 | 337 |
| 317 | 338 | 337 |
| 317 | 318 | 338 |
| 318 | 339 | 338 |
| 318 | 319 | 339 |
| 319 | 340 | 339 |
| 319 | 320 | 340 |
| 320 | 341 | 340 |
| 320 | 321 | 341 |
| 321 | 342 | 341 |



|     |     |     |
|-----|-----|-----|
| 321 | 322 | 342 |
| 322 | 343 | 342 |
| 322 | 323 | 343 |
| 323 | 344 | 343 |
| 323 | 324 | 344 |
| 324 | 345 | 344 |
| 324 | 325 | 345 |
| 325 | 346 | 345 |
| 325 | 326 | 346 |
| 326 | 347 | 346 |
| 326 | 327 | 347 |
| 327 | 348 | 347 |
| 327 | 328 | 348 |
| 328 | 349 | 348 |
| 328 | 329 | 349 |
| 329 | 350 | 349 |
| 329 | 330 | 350 |
| 330 | 351 | 350 |
| 330 | 331 | 351 |
| 331 | 352 | 351 |
| 331 | 332 | 352 |
| 332 | 353 | 352 |
| 332 | 333 | 353 |
| 333 | 354 | 353 |
| 333 | 334 | 354 |
| 334 | 355 | 354 |

|     |     |     |
|-----|-----|-----|
| 334 | 335 | 355 |
| 335 | 356 | 355 |
| 335 | 336 | 356 |
| 336 | 357 | 356 |
| 337 | 338 | 358 |
| 338 | 359 | 358 |
| 338 | 339 | 359 |
| 339 | 360 | 359 |
| 339 | 340 | 360 |
| 340 | 361 | 360 |
| 340 | 341 | 361 |
| 341 | 362 | 361 |
| 341 | 342 | 362 |
| 342 | 363 | 362 |
| 342 | 343 | 363 |
| 343 | 364 | 363 |
| 343 | 344 | 364 |
| 344 | 365 | 364 |
| 344 | 345 | 365 |
| 345 | 366 | 365 |
| 345 | 346 | 366 |
| 346 | 367 | 366 |
| 346 | 347 | 367 |
| 347 | 368 | 367 |
| 347 | 348 | 368 |
| 348 | 369 | 368 |

|     |     |     |
|-----|-----|-----|
| 348 | 349 | 369 |
| 349 | 370 | 369 |
| 349 | 350 | 370 |
| 350 | 371 | 370 |
| 350 | 351 | 371 |
| 351 | 372 | 371 |
| 351 | 352 | 372 |
| 352 | 373 | 372 |
| 352 | 353 | 373 |
| 353 | 374 | 373 |
| 353 | 354 | 374 |
| 354 | 375 | 374 |
| 354 | 355 | 375 |
| 355 | 376 | 375 |
| 355 | 356 | 376 |
| 356 | 377 | 376 |
| 356 | 357 | 377 |
| 357 | 378 | 377 |
| 358 | 359 | 379 |
| 359 | 380 | 379 |
| 359 | 360 | 380 |
| 360 | 381 | 380 |
| 360 | 361 | 381 |
| 361 | 382 | 381 |
| 361 | 362 | 382 |
| 362 | 383 | 382 |

|     |     |     |
|-----|-----|-----|
| 362 | 363 | 383 |
| 363 | 384 | 383 |
| 363 | 364 | 384 |
| 364 | 385 | 384 |
| 364 | 365 | 385 |
| 365 | 386 | 385 |
| 365 | 366 | 386 |
| 366 | 387 | 386 |
| 366 | 367 | 387 |
| 367 | 388 | 387 |
| 367 | 368 | 388 |
| 368 | 389 | 388 |
| 368 | 369 | 389 |
| 369 | 390 | 389 |
| 369 | 370 | 390 |
| 370 | 391 | 390 |
| 370 | 371 | 391 |
| 371 | 392 | 391 |
| 371 | 372 | 392 |
| 372 | 393 | 392 |
| 372 | 373 | 393 |
| 373 | 394 | 393 |
| 373 | 374 | 394 |
| 374 | 395 | 394 |
| 374 | 375 | 395 |
| 375 | 396 | 395 |

|     |     |     |
|-----|-----|-----|
| 375 | 376 | 396 |
| 376 | 397 | 396 |
| 376 | 377 | 397 |
| 377 | 398 | 397 |
| 377 | 378 | 398 |
| 378 | 399 | 398 |
| 379 | 380 | 400 |
| 380 | 401 | 400 |
| 380 | 381 | 401 |
| 381 | 402 | 401 |
| 381 | 382 | 402 |
| 382 | 403 | 402 |
| 382 | 383 | 403 |
| 383 | 404 | 403 |
| 383 | 384 | 404 |
| 384 | 405 | 404 |
| 384 | 385 | 405 |
| 385 | 406 | 405 |
| 385 | 386 | 406 |
| 386 | 407 | 406 |
| 386 | 387 | 407 |
| 387 | 408 | 407 |
| 387 | 388 | 408 |
| 388 | 409 | 408 |
| 388 | 389 | 409 |
| 389 | 410 | 409 |

|     |     |     |
|-----|-----|-----|
| 389 | 390 | 410 |
| 390 | 411 | 410 |
| 390 | 391 | 411 |
| 391 | 412 | 411 |
| 391 | 392 | 412 |
| 392 | 413 | 412 |
| 392 | 393 | 413 |
| 393 | 414 | 413 |
| 393 | 394 | 414 |
| 394 | 415 | 414 |
| 394 | 395 | 415 |
| 395 | 416 | 415 |
| 395 | 396 | 416 |
| 396 | 417 | 416 |
| 396 | 397 | 417 |
| 397 | 418 | 417 |
| 397 | 398 | 418 |
| 398 | 419 | 418 |
| 398 | 399 | 419 |
| 399 | 420 | 419 |
| 400 | 401 | 421 |
| 401 | 422 | 421 |
| 401 | 402 | 422 |
| 402 | 423 | 422 |
| 402 | 403 | 423 |
| 403 | 424 | 423 |

|     |     |     |
|-----|-----|-----|
| 403 | 404 | 424 |
| 404 | 425 | 424 |
| 404 | 405 | 425 |
| 405 | 426 | 425 |
| 405 | 406 | 426 |
| 406 | 427 | 426 |
| 406 | 407 | 427 |
| 407 | 428 | 427 |
| 407 | 408 | 428 |
| 408 | 429 | 428 |
| 408 | 409 | 429 |
| 409 | 430 | 429 |
| 409 | 410 | 430 |
| 410 | 431 | 430 |
| 410 | 411 | 431 |
| 411 | 432 | 431 |
| 411 | 412 | 432 |
| 412 | 433 | 432 |
| 412 | 413 | 433 |
| 413 | 434 | 433 |
| 413 | 414 | 434 |
| 414 | 435 | 434 |
| 414 | 415 | 435 |
| 415 | 436 | 435 |
| 415 | 416 | 436 |
| 416 | 437 | 436 |

|     |     |     |
|-----|-----|-----|
| 416 | 417 | 437 |
| 417 | 438 | 437 |
| 417 | 418 | 438 |
| 418 | 439 | 438 |
| 418 | 419 | 439 |
| 419 | 440 | 439 |
| 419 | 420 | 440 |
| 420 | 441 | 440 |
| 421 | 422 | 442 |
| 422 | 443 | 442 |
| 422 | 423 | 443 |
| 423 | 444 | 443 |
| 423 | 424 | 444 |
| 424 | 445 | 444 |
| 424 | 425 | 445 |
| 425 | 446 | 445 |
| 425 | 426 | 446 |
| 426 | 447 | 446 |
| 426 | 427 | 447 |
| 427 | 448 | 447 |
| 427 | 428 | 448 |
| 428 | 449 | 448 |
| 428 | 429 | 449 |
| 429 | 450 | 449 |
| 429 | 430 | 450 |
| 430 | 451 | 450 |



|     |     |     |
|-----|-----|-----|
| 430 | 431 | 451 |
| 431 | 452 | 451 |
| 431 | 432 | 452 |
| 432 | 453 | 452 |
| 432 | 433 | 453 |
| 433 | 454 | 453 |
| 433 | 434 | 454 |
| 434 | 455 | 454 |
| 434 | 435 | 455 |
| 435 | 456 | 455 |
| 435 | 436 | 456 |
| 436 | 457 | 456 |
| 436 | 437 | 457 |
| 437 | 458 | 457 |
| 437 | 438 | 458 |
| 438 | 459 | 458 |
| 438 | 439 | 459 |
| 439 | 460 | 459 |
| 439 | 440 | 460 |
| 440 | 461 | 460 |
| 440 | 441 | 461 |
| 441 | 462 | 461 |
| 442 | 443 | 463 |
| 443 | 464 | 463 |
| 443 | 444 | 464 |
| 444 | 465 | 464 |

|     |     |     |
|-----|-----|-----|
| 444 | 445 | 465 |
| 445 | 466 | 465 |
| 445 | 446 | 466 |
| 446 | 467 | 466 |
| 446 | 447 | 467 |
| 447 | 468 | 467 |
| 447 | 448 | 468 |
| 448 | 469 | 468 |
| 448 | 449 | 469 |
| 449 | 470 | 469 |
| 449 | 450 | 470 |
| 450 | 471 | 470 |
| 450 | 451 | 471 |
| 451 | 472 | 471 |
| 451 | 452 | 472 |
| 452 | 473 | 472 |
| 452 | 453 | 473 |
| 453 | 474 | 473 |
| 453 | 454 | 474 |
| 454 | 475 | 474 |
| 454 | 455 | 475 |
| 455 | 476 | 475 |
| 455 | 456 | 476 |
| 456 | 477 | 476 |
| 456 | 457 | 477 |
| 457 | 478 | 477 |

|     |     |     |
|-----|-----|-----|
| 457 | 458 | 478 |
| 458 | 479 | 478 |
| 458 | 459 | 479 |
| 459 | 480 | 479 |
| 459 | 460 | 480 |
| 460 | 481 | 480 |
| 460 | 461 | 481 |
| 461 | 482 | 481 |
| 461 | 462 | 482 |
| 462 | 483 | 482 |
| 463 | 464 | 484 |
| 464 | 485 | 484 |
| 464 | 465 | 485 |
| 465 | 486 | 485 |
| 465 | 466 | 486 |
| 466 | 487 | 486 |
| 466 | 467 | 487 |
| 467 | 488 | 487 |
| 467 | 468 | 488 |
| 468 | 489 | 488 |
| 468 | 469 | 489 |
| 469 | 490 | 489 |
| 469 | 470 | 490 |
| 470 | 491 | 490 |
| 470 | 471 | 491 |
| 471 | 492 | 491 |

|     |     |     |
|-----|-----|-----|
| 471 | 472 | 492 |
| 472 | 493 | 492 |
| 472 | 473 | 493 |
| 473 | 494 | 493 |
| 473 | 474 | 494 |
| 474 | 495 | 494 |
| 474 | 475 | 495 |
| 475 | 496 | 495 |
| 475 | 476 | 496 |
| 476 | 497 | 496 |
| 476 | 477 | 497 |
| 477 | 498 | 497 |
| 477 | 478 | 498 |
| 478 | 499 | 498 |
| 478 | 479 | 499 |
| 479 | 500 | 499 |
| 479 | 480 | 500 |
| 480 | 501 | 500 |
| 480 | 481 | 501 |
| 481 | 502 | 501 |
| 481 | 482 | 502 |
| 482 | 503 | 502 |
| 482 | 483 | 503 |
| 483 | 504 | 503 |
| 484 | 485 | 505 |
| 485 | 506 | 505 |

|     |     |     |
|-----|-----|-----|
| 485 | 486 | 506 |
| 486 | 507 | 506 |
| 486 | 487 | 507 |
| 487 | 508 | 507 |
| 487 | 488 | 508 |
| 488 | 509 | 508 |
| 488 | 489 | 509 |
| 489 | 510 | 509 |
| 489 | 490 | 510 |
| 490 | 511 | 510 |
| 490 | 491 | 511 |
| 491 | 512 | 511 |
| 491 | 492 | 512 |
| 492 | 513 | 512 |
| 492 | 493 | 513 |
| 493 | 514 | 513 |
| 493 | 494 | 514 |
| 494 | 515 | 514 |
| 494 | 495 | 515 |
| 495 | 516 | 515 |
| 495 | 496 | 516 |
| 496 | 517 | 516 |
| 496 | 497 | 517 |
| 497 | 518 | 517 |
| 497 | 498 | 518 |
| 498 | 519 | 518 |

|     |     |     |
|-----|-----|-----|
| 498 | 499 | 519 |
| 499 | 520 | 519 |
| 499 | 500 | 520 |
| 500 | 521 | 520 |
| 500 | 501 | 521 |
| 501 | 522 | 521 |
| 501 | 502 | 522 |
| 502 | 523 | 522 |
| 502 | 503 | 523 |
| 503 | 524 | 523 |
| 503 | 504 | 524 |
| 504 | 525 | 524 |
| 505 | 506 | 526 |
| 506 | 527 | 526 |
| 506 | 507 | 527 |
| 507 | 528 | 527 |
| 507 | 508 | 528 |
| 508 | 529 | 528 |
| 508 | 509 | 529 |
| 509 | 530 | 529 |
| 509 | 510 | 530 |
| 510 | 531 | 530 |
| 510 | 511 | 531 |
| 511 | 532 | 531 |
| 511 | 512 | 532 |
| 512 | 533 | 532 |

|     |     |     |
|-----|-----|-----|
| 512 | 513 | 533 |
| 513 | 534 | 533 |
| 513 | 514 | 534 |
| 514 | 535 | 534 |
| 514 | 515 | 535 |
| 515 | 536 | 535 |
| 515 | 516 | 536 |
| 516 | 537 | 536 |
| 516 | 517 | 537 |
| 517 | 538 | 537 |
| 517 | 518 | 538 |
| 518 | 539 | 538 |
| 518 | 519 | 539 |
| 519 | 540 | 539 |
| 519 | 520 | 540 |
| 520 | 541 | 540 |
| 520 | 521 | 541 |
| 521 | 542 | 541 |
| 521 | 522 | 542 |
| 522 | 543 | 542 |
| 522 | 523 | 543 |
| 523 | 544 | 543 |
| 523 | 524 | 544 |
| 524 | 545 | 544 |
| 524 | 525 | 545 |
| 525 | 546 | 545 |

|     |     |     |
|-----|-----|-----|
| 526 | 527 | 547 |
| 527 | 548 | 547 |
| 527 | 528 | 548 |
| 528 | 549 | 548 |
| 528 | 529 | 549 |
| 529 | 550 | 549 |
| 529 | 530 | 550 |
| 530 | 551 | 550 |
| 530 | 531 | 551 |
| 531 | 552 | 551 |
| 531 | 532 | 552 |
| 532 | 553 | 552 |
| 532 | 533 | 553 |
| 533 | 554 | 553 |
| 533 | 534 | 554 |
| 534 | 555 | 554 |
| 534 | 535 | 555 |
| 535 | 556 | 555 |
| 535 | 536 | 556 |
| 536 | 557 | 556 |
| 536 | 537 | 557 |
| 537 | 558 | 557 |
| 537 | 538 | 558 |
| 538 | 559 | 558 |
| 538 | 539 | 559 |
| 539 | 560 | 559 |



|     |     |     |
|-----|-----|-----|
| 539 | 540 | 560 |
| 540 | 561 | 560 |
| 540 | 541 | 561 |
| 541 | 562 | 561 |
| 541 | 542 | 562 |
| 542 | 563 | 562 |
| 542 | 543 | 563 |
| 543 | 564 | 563 |
| 543 | 544 | 564 |
| 544 | 565 | 564 |
| 544 | 545 | 565 |
| 545 | 566 | 565 |
| 545 | 546 | 566 |
| 546 | 567 | 566 |
| 547 | 548 | 568 |
| 548 | 569 | 568 |
| 548 | 549 | 569 |
| 549 | 570 | 569 |
| 549 | 550 | 570 |
| 550 | 571 | 570 |
| 550 | 551 | 571 |
| 551 | 572 | 571 |
| 551 | 552 | 572 |
| 552 | 573 | 572 |
| 552 | 553 | 573 |
| 553 | 574 | 573 |

|     |     |     |
|-----|-----|-----|
| 553 | 554 | 574 |
| 554 | 575 | 574 |
| 554 | 555 | 575 |
| 555 | 576 | 575 |
| 555 | 556 | 576 |
| 556 | 577 | 576 |
| 556 | 557 | 577 |
| 557 | 578 | 577 |
| 557 | 558 | 578 |
| 558 | 579 | 578 |
| 558 | 559 | 579 |
| 559 | 580 | 579 |
| 559 | 560 | 580 |
| 560 | 581 | 580 |
| 560 | 561 | 581 |
| 561 | 582 | 581 |
| 561 | 562 | 582 |
| 562 | 583 | 582 |
| 562 | 563 | 583 |
| 563 | 584 | 583 |
| 563 | 564 | 584 |
| 564 | 585 | 584 |
| 564 | 565 | 585 |
| 565 | 586 | 585 |
| 565 | 566 | 586 |
| 566 | 587 | 586 |

|     |     |     |
|-----|-----|-----|
| 566 | 567 | 587 |
| 567 | 588 | 587 |
| 568 | 569 | 589 |
| 569 | 590 | 589 |
| 569 | 570 | 590 |
| 570 | 591 | 590 |
| 570 | 571 | 591 |
| 571 | 592 | 591 |
| 571 | 572 | 592 |
| 572 | 593 | 592 |
| 572 | 573 | 593 |
| 573 | 594 | 593 |
| 573 | 574 | 594 |
| 574 | 595 | 594 |
| 574 | 575 | 595 |
| 575 | 596 | 595 |
| 575 | 576 | 596 |
| 576 | 597 | 596 |
| 576 | 577 | 597 |
| 577 | 598 | 597 |
| 577 | 578 | 598 |
| 578 | 599 | 598 |
| 578 | 579 | 599 |
| 579 | 600 | 599 |
| 579 | 580 | 600 |
| 580 | 601 | 600 |

|     |     |     |
|-----|-----|-----|
| 580 | 581 | 601 |
| 581 | 602 | 601 |
| 581 | 582 | 602 |
| 582 | 603 | 602 |
| 582 | 583 | 603 |
| 583 | 604 | 603 |
| 583 | 584 | 604 |
| 584 | 605 | 604 |
| 584 | 585 | 605 |
| 585 | 606 | 605 |
| 585 | 586 | 606 |
| 586 | 607 | 606 |
| 586 | 587 | 607 |
| 587 | 608 | 607 |
| 587 | 588 | 608 |
| 588 | 609 | 608 |
| 589 | 590 | 610 |
| 590 | 611 | 610 |
| 590 | 591 | 611 |
| 591 | 612 | 611 |
| 591 | 592 | 612 |
| 592 | 613 | 612 |
| 592 | 593 | 613 |
| 593 | 614 | 613 |
| 593 | 594 | 614 |
| 594 | 615 | 614 |

|     |     |     |
|-----|-----|-----|
| 594 | 595 | 615 |
| 595 | 616 | 615 |
| 595 | 596 | 616 |
| 596 | 617 | 616 |
| 596 | 597 | 617 |
| 597 | 618 | 617 |
| 597 | 598 | 618 |
| 598 | 619 | 618 |
| 598 | 599 | 619 |
| 599 | 620 | 619 |
| 599 | 600 | 620 |
| 600 | 621 | 620 |
| 600 | 601 | 621 |
| 601 | 622 | 621 |
| 601 | 602 | 622 |
| 602 | 623 | 622 |
| 602 | 603 | 623 |
| 603 | 624 | 623 |
| 603 | 604 | 624 |
| 604 | 625 | 624 |
| 604 | 605 | 625 |
| 605 | 626 | 625 |
| 605 | 606 | 626 |
| 606 | 627 | 626 |
| 606 | 607 | 627 |
| 607 | 628 | 627 |

|     |     |     |
|-----|-----|-----|
| 607 | 608 | 628 |
| 608 | 629 | 628 |
| 608 | 609 | 629 |
| 609 | 630 | 629 |
| 610 | 611 | 631 |
| 611 | 632 | 631 |
| 611 | 612 | 632 |
| 612 | 633 | 632 |
| 612 | 613 | 633 |
| 613 | 634 | 633 |
| 613 | 614 | 634 |
| 614 | 635 | 634 |
| 614 | 615 | 635 |
| 615 | 636 | 635 |
| 615 | 616 | 636 |
| 616 | 637 | 636 |
| 616 | 617 | 637 |
| 617 | 638 | 637 |
| 617 | 618 | 638 |
| 618 | 639 | 638 |
| 618 | 619 | 639 |
| 619 | 640 | 639 |
| 619 | 620 | 640 |
| 620 | 641 | 640 |
| 620 | 621 | 641 |
| 621 | 642 | 641 |

|     |     |     |
|-----|-----|-----|
| 621 | 622 | 642 |
| 622 | 643 | 642 |
| 622 | 623 | 643 |
| 623 | 644 | 643 |
| 623 | 624 | 644 |
| 624 | 645 | 644 |
| 624 | 625 | 645 |
| 625 | 646 | 645 |
| 625 | 626 | 646 |
| 626 | 647 | 646 |
| 626 | 627 | 647 |
| 627 | 648 | 647 |
| 627 | 628 | 648 |
| 628 | 649 | 648 |
| 628 | 629 | 649 |
| 629 | 650 | 649 |
| 629 | 630 | 650 |
| 630 | 651 | 650 |
| 631 | 632 | 652 |
| 632 | 653 | 652 |
| 632 | 633 | 653 |
| 633 | 654 | 653 |
| 633 | 634 | 654 |
| 634 | 655 | 654 |
| 634 | 635 | 655 |
| 635 | 656 | 655 |

|     |     |     |
|-----|-----|-----|
| 635 | 636 | 656 |
| 636 | 657 | 656 |
| 636 | 637 | 657 |
| 637 | 658 | 657 |
| 637 | 638 | 658 |
| 638 | 659 | 658 |
| 638 | 639 | 659 |
| 639 | 660 | 659 |
| 639 | 640 | 660 |
| 640 | 661 | 660 |
| 640 | 641 | 661 |
| 641 | 662 | 661 |
| 641 | 642 | 662 |
| 642 | 663 | 662 |
| 642 | 643 | 663 |
| 643 | 664 | 663 |
| 643 | 644 | 664 |
| 644 | 665 | 664 |
| 644 | 645 | 665 |
| 645 | 666 | 665 |
| 645 | 646 | 666 |
| 646 | 667 | 666 |
| 646 | 647 | 667 |
| 647 | 668 | 667 |
| 647 | 648 | 668 |
| 648 | 669 | 668 |



|     |     |     |
|-----|-----|-----|
| 648 | 649 | 669 |
| 649 | 670 | 669 |
| 649 | 650 | 670 |
| 650 | 671 | 670 |
| 650 | 651 | 671 |
| 651 | 672 | 671 |
| 652 | 653 | 673 |
| 653 | 674 | 673 |
| 653 | 654 | 674 |
| 654 | 675 | 674 |
| 654 | 655 | 675 |
| 655 | 676 | 675 |
| 655 | 656 | 676 |
| 656 | 677 | 676 |
| 656 | 657 | 677 |
| 657 | 678 | 677 |
| 657 | 658 | 678 |
| 658 | 679 | 678 |
| 658 | 659 | 679 |
| 659 | 680 | 679 |
| 659 | 660 | 680 |
| 660 | 681 | 680 |
| 660 | 661 | 681 |
| 661 | 682 | 681 |
| 661 | 662 | 682 |
| 662 | 683 | 682 |

|     |     |     |
|-----|-----|-----|
| 662 | 663 | 683 |
| 663 | 684 | 683 |
| 663 | 664 | 684 |
| 664 | 685 | 684 |
| 664 | 665 | 685 |
| 665 | 686 | 685 |
| 665 | 666 | 686 |
| 666 | 687 | 686 |
| 666 | 667 | 687 |
| 667 | 688 | 687 |
| 667 | 668 | 688 |
| 668 | 689 | 688 |
| 668 | 669 | 689 |
| 669 | 690 | 689 |
| 669 | 670 | 690 |
| 670 | 691 | 690 |
| 670 | 671 | 691 |
| 671 | 692 | 691 |
| 671 | 672 | 692 |
| 672 | 693 | 692 |
| 673 | 674 | 694 |
| 674 | 695 | 694 |
| 674 | 675 | 695 |
| 675 | 696 | 695 |
| 675 | 676 | 696 |
| 676 | 697 | 696 |

|     |     |     |
|-----|-----|-----|
| 676 | 677 | 697 |
| 677 | 698 | 697 |
| 677 | 678 | 698 |
| 678 | 699 | 698 |
| 678 | 679 | 699 |
| 679 | 700 | 699 |
| 679 | 680 | 700 |
| 680 | 701 | 700 |
| 680 | 681 | 701 |
| 681 | 702 | 701 |
| 681 | 682 | 702 |
| 682 | 703 | 702 |
| 682 | 683 | 703 |
| 683 | 704 | 703 |
| 683 | 684 | 704 |
| 684 | 705 | 704 |
| 684 | 685 | 705 |
| 685 | 706 | 705 |
| 685 | 686 | 706 |
| 686 | 707 | 706 |
| 686 | 687 | 707 |
| 687 | 708 | 707 |
| 687 | 688 | 708 |
| 688 | 709 | 708 |
| 688 | 689 | 709 |
| 689 | 710 | 709 |

|     |     |     |
|-----|-----|-----|
| 689 | 690 | 710 |
| 690 | 711 | 710 |
| 690 | 691 | 711 |
| 691 | 712 | 711 |
| 691 | 692 | 712 |
| 692 | 713 | 712 |
| 692 | 693 | 713 |
| 693 | 714 | 713 |
| 694 | 695 | 715 |
| 695 | 716 | 715 |
| 695 | 696 | 716 |
| 696 | 717 | 716 |
| 696 | 697 | 717 |
| 697 | 718 | 717 |
| 697 | 698 | 718 |
| 698 | 719 | 718 |
| 698 | 699 | 719 |
| 699 | 720 | 719 |
| 699 | 700 | 720 |
| 700 | 721 | 720 |
| 700 | 701 | 721 |
| 701 | 722 | 721 |
| 701 | 702 | 722 |
| 702 | 723 | 722 |
| 702 | 703 | 723 |
| 703 | 724 | 723 |

|     |     |     |
|-----|-----|-----|
| 703 | 704 | 724 |
| 704 | 725 | 724 |
| 704 | 705 | 725 |
| 705 | 726 | 725 |
| 705 | 706 | 726 |
| 706 | 727 | 726 |
| 706 | 707 | 727 |
| 707 | 728 | 727 |
| 707 | 708 | 728 |
| 708 | 729 | 728 |
| 708 | 709 | 729 |
| 709 | 730 | 729 |
| 709 | 710 | 730 |
| 710 | 731 | 730 |
| 710 | 711 | 731 |
| 711 | 732 | 731 |
| 711 | 712 | 732 |
| 712 | 733 | 732 |
| 712 | 713 | 733 |
| 713 | 734 | 733 |
| 713 | 714 | 734 |
| 714 | 735 | 734 |
| 715 | 716 | 736 |
| 716 | 737 | 736 |
| 716 | 717 | 737 |
| 717 | 738 | 737 |

|     |     |     |
|-----|-----|-----|
| 717 | 718 | 738 |
| 718 | 739 | 738 |
| 718 | 719 | 739 |
| 719 | 740 | 739 |
| 719 | 720 | 740 |
| 720 | 741 | 740 |
| 720 | 721 | 741 |
| 721 | 742 | 741 |
| 721 | 722 | 742 |
| 722 | 743 | 742 |
| 722 | 723 | 743 |
| 723 | 744 | 743 |
| 723 | 724 | 744 |
| 724 | 745 | 744 |
| 724 | 725 | 745 |
| 725 | 746 | 745 |
| 725 | 726 | 746 |
| 726 | 747 | 746 |
| 726 | 727 | 747 |
| 727 | 748 | 747 |
| 727 | 728 | 748 |
| 728 | 749 | 748 |
| 728 | 729 | 749 |
| 729 | 750 | 749 |
| 729 | 730 | 750 |
| 730 | 751 | 750 |

|     |     |     |
|-----|-----|-----|
| 730 | 731 | 751 |
| 731 | 752 | 751 |
| 731 | 732 | 752 |
| 732 | 753 | 752 |
| 732 | 733 | 753 |
| 733 | 754 | 753 |
| 733 | 734 | 754 |
| 734 | 755 | 754 |
| 734 | 735 | 755 |
| 735 | 756 | 755 |
| 736 | 737 | 757 |
| 737 | 758 | 757 |
| 737 | 738 | 758 |
| 738 | 759 | 758 |
| 738 | 739 | 759 |
| 739 | 760 | 759 |
| 739 | 740 | 760 |
| 740 | 761 | 760 |
| 740 | 741 | 761 |
| 741 | 762 | 761 |
| 741 | 742 | 762 |
| 742 | 763 | 762 |
| 742 | 743 | 763 |
| 743 | 764 | 763 |
| 743 | 744 | 764 |
| 744 | 765 | 764 |

|     |     |     |
|-----|-----|-----|
| 744 | 745 | 765 |
| 745 | 766 | 765 |
| 745 | 746 | 766 |
| 746 | 767 | 766 |
| 746 | 747 | 767 |
| 747 | 768 | 767 |
| 747 | 748 | 768 |
| 748 | 769 | 768 |
| 748 | 749 | 769 |
| 749 | 770 | 769 |
| 749 | 750 | 770 |
| 750 | 771 | 770 |
| 750 | 751 | 771 |
| 751 | 772 | 771 |
| 751 | 752 | 772 |
| 752 | 773 | 772 |
| 752 | 753 | 773 |
| 753 | 774 | 773 |
| 753 | 754 | 774 |
| 754 | 775 | 774 |
| 754 | 755 | 775 |
| 755 | 776 | 775 |
| 755 | 756 | 776 |
| 756 | 777 | 776 |
| 757 | 758 | 778 |
| 758 | 779 | 778 |



|     |     |     |
|-----|-----|-----|
| 758 | 759 | 779 |
| 759 | 780 | 779 |
| 759 | 760 | 780 |
| 760 | 781 | 780 |
| 760 | 761 | 781 |
| 761 | 782 | 781 |
| 761 | 762 | 782 |
| 762 | 783 | 782 |
| 762 | 763 | 783 |
| 763 | 784 | 783 |
| 763 | 764 | 784 |
| 764 | 785 | 784 |
| 764 | 765 | 785 |
| 765 | 786 | 785 |
| 765 | 766 | 786 |
| 766 | 787 | 786 |
| 766 | 767 | 787 |
| 767 | 788 | 787 |
| 767 | 768 | 788 |
| 768 | 789 | 788 |
| 768 | 769 | 789 |
| 769 | 790 | 789 |
| 769 | 770 | 790 |
| 770 | 791 | 790 |
| 770 | 771 | 791 |
| 771 | 792 | 791 |

|     |     |     |
|-----|-----|-----|
| 771 | 772 | 792 |
| 772 | 793 | 792 |
| 772 | 773 | 793 |
| 773 | 794 | 793 |
| 773 | 774 | 794 |
| 774 | 795 | 794 |
| 774 | 775 | 795 |
| 775 | 796 | 795 |
| 775 | 776 | 796 |
| 776 | 797 | 796 |
| 776 | 777 | 797 |
| 777 | 798 | 797 |
| 778 | 779 | 799 |
| 779 | 800 | 799 |
| 779 | 780 | 800 |
| 780 | 801 | 800 |
| 780 | 781 | 801 |
| 781 | 802 | 801 |
| 781 | 782 | 802 |
| 782 | 803 | 802 |
| 782 | 783 | 803 |
| 783 | 804 | 803 |
| 783 | 784 | 804 |
| 784 | 805 | 804 |
| 784 | 785 | 805 |
| 785 | 806 | 805 |

|     |     |     |
|-----|-----|-----|
| 785 | 786 | 806 |
| 786 | 807 | 806 |
| 786 | 787 | 807 |
| 787 | 808 | 807 |
| 787 | 788 | 808 |
| 788 | 809 | 808 |
| 788 | 789 | 809 |
| 789 | 810 | 809 |
| 789 | 790 | 810 |
| 790 | 811 | 810 |
| 790 | 791 | 811 |
| 791 | 812 | 811 |
| 791 | 792 | 812 |
| 792 | 813 | 812 |
| 792 | 793 | 813 |
| 793 | 814 | 813 |
| 793 | 794 | 814 |
| 794 | 815 | 814 |
| 794 | 795 | 815 |
| 795 | 816 | 815 |
| 795 | 796 | 816 |
| 796 | 817 | 816 |
| 796 | 797 | 817 |
| 797 | 818 | 817 |
| 797 | 798 | 818 |
| 798 | 819 | 818 |

|     |     |     |
|-----|-----|-----|
| 799 | 800 | 820 |
| 800 | 821 | 820 |
| 800 | 801 | 821 |
| 801 | 822 | 821 |
| 801 | 802 | 822 |
| 802 | 823 | 822 |
| 802 | 803 | 823 |
| 803 | 824 | 823 |
| 803 | 804 | 824 |
| 804 | 825 | 824 |
| 804 | 805 | 825 |
| 805 | 826 | 825 |
| 805 | 806 | 826 |
| 806 | 827 | 826 |
| 806 | 807 | 827 |
| 807 | 828 | 827 |
| 807 | 808 | 828 |
| 808 | 829 | 828 |
| 808 | 809 | 829 |
| 809 | 830 | 829 |
| 809 | 810 | 830 |
| 810 | 831 | 830 |
| 810 | 811 | 831 |
| 811 | 832 | 831 |
| 811 | 812 | 832 |
| 812 | 833 | 832 |

|     |     |     |
|-----|-----|-----|
| 812 | 813 | 833 |
| 813 | 834 | 833 |
| 813 | 814 | 834 |
| 814 | 835 | 834 |
| 814 | 815 | 835 |
| 815 | 836 | 835 |
| 815 | 816 | 836 |
| 816 | 837 | 836 |
| 816 | 817 | 837 |
| 817 | 838 | 837 |
| 817 | 818 | 838 |
| 818 | 839 | 838 |
| 818 | 819 | 839 |
| 819 | 840 | 839 |
| 820 | 821 | 1   |
| 821 | 2   | 1   |
| 821 | 822 | 2   |
| 822 | 3   | 2   |
| 822 | 823 | 3   |
| 823 | 4   | 3   |
| 823 | 824 | 4   |
| 824 | 5   | 4   |
| 824 | 825 | 5   |
| 825 | 6   | 5   |
| 825 | 826 | 6   |
| 826 | 7   | 6   |

|     |     |    |
|-----|-----|----|
| 826 | 827 | 7  |
| 827 | 8   | 7  |
| 827 | 828 | 8  |
| 828 | 9   | 8  |
| 828 | 829 | 9  |
| 829 | 10  | 9  |
| 829 | 830 | 10 |
| 830 | 11  | 10 |
| 830 | 831 | 11 |
| 831 | 12  | 11 |
| 831 | 832 | 12 |
| 832 | 13  | 12 |
| 832 | 833 | 13 |
| 833 | 14  | 13 |
| 833 | 834 | 14 |
| 834 | 15  | 14 |
| 834 | 835 | 15 |
| 835 | 16  | 15 |
| 835 | 836 | 16 |
| 836 | 17  | 16 |
| 836 | 837 | 17 |
| 837 | 18  | 17 |
| 837 | 838 | 18 |
| 838 | 19  | 18 |
| 838 | 839 | 19 |
| 839 | 20  | 19 |

|     |     |    |
|-----|-----|----|
| 839 | 840 | 20 |
| 840 | 21  | 20 |

### Three-hour cloud chart (a) Scheme 1

| VARIABLES = X, Y, T/°C" |                                          |   |             |
|-------------------------|------------------------------------------|---|-------------|
| ZONE                    | N= 840 ,E = 1600 ,f=FEPOINT, ET=TRIANGLE |   |             |
|                         | 0.05                                     | 0 | 13.30977482 |
|                         | 5.70E-02                                 | 0 | 13.95942454 |
|                         | 6.47E-02                                 | 0 | 14.58261411 |
|                         | 7.31E-02                                 | 0 | 15.18111975 |
|                         | 0.08241205                               | 0 | 15.755805   |
|                         | 9.26E-02                                 | 0 | 16.30670512 |
|                         | 0.10388466                               | 0 | 16.83308214 |
|                         | 0.11625698                               | 0 | 17.33346935 |
|                         | 0.12986653                               | 0 | 17.80572498 |
|                         | 0.14483703                               | 0 | 18.24711682 |
|                         | 0.16130458                               | 0 | 18.65446147 |
|                         | 0.17941889                               | 0 | 19.02434207 |
|                         | 0.19934463                               | 0 | 19.35342339 |
|                         | 0.22126294                               | 0 | 19.63886992 |
|                         | 0.24537308                               | 0 | 19.87884777 |
|                         | 0.27189424                               | 0 | 20.0730563  |
|                         | 0.30106752                               | 0 | 20.22319881 |
|                         | 0.33315812                               | 0 | 20.33328812 |
|                         | 0.36845778                               | 0 | 20.40973733 |

|            |             |             |
|------------|-------------|-------------|
| 0.40728741 | 0           | 20.46137988 |
| 0.45       | 0           | 20.5        |
| 4.94E-02   | 7.82E-03    | 13.30870162 |
| 0.05637901 | 8.97E-03    | 13.96722209 |
| 6.41E-02   | 1.02E-02    | 14.59768667 |
| 7.25E-02   | 1.16E-02    | 15.20216426 |
| 0.08184635 | 1.32E-02    | 15.78169955 |
| 9.21E-02   | 0.014844815 | 16.33643881 |
| 0.10335201 | 1.67E-02    | 16.86570931 |
| 0.11574336 | 1.87E-02    | 17.36807897 |
| 0.12937385 | 2.10E-02    | 17.84142074 |
| 0.1443674  | 2.34E-02    | 18.28300632 |
| 0.16086029 | 2.62E-02    | 18.68965492 |
| 0.17900248 | 2.91E-02    | 19.05796229 |
| 0.19895888 | 0.03242145  | 19.38462948 |
| 0.22091092 | 3.60E-02    | 19.66689675 |
| 0.24505817 | 4.00E-02    | 19.90306106 |
| 0.27162015 | 4.44E-02    | 20.09301777 |
| 0.30083832 | 4.92E-02    | 20.23872658 |
| 0.3329783  | 5.45E-02    | 20.34448477 |
| 0.36833229 | 6.03E-02    | 20.41694276 |
| 0.40722168 | 6.67E-02    | 20.46498427 |
| 0.45       | 7.37E-02    | 20.5        |
| 4.76E-02   | 1.55E-02    | 13.30806783 |
| 5.46E-02   | 1.79E-02    | 13.99619657 |
| 6.23E-02   | 2.06E-02    | 14.65096912 |



|            |             |             |
|------------|-------------|-------------|
| 7.08E-02   | 2.35E-02    | 15.2753481  |
| 8.02E-02   | 2.67E-02    | 15.8709402  |
| 0.09045078 | 3.03E-02    | 16.43824035 |
| 0.10176715 | 0.034221271 | 16.97677758 |
| 0.11421516 | 3.85E-02    | 17.48521905 |
| 0.12790797 | 4.33E-02    | 17.9614712  |
| 0.14297006 | 4.85E-02    | 18.40281103 |
| 0.15953836 | 5.42E-02    | 18.80607793 |
| 0.17776349 | 6.05E-02    | 19.16795341 |
| 0.19781113 | 6.75E-02    | 19.48534665 |
| 0.21986354 | 7.51E-02    | 19.75588409 |
| 0.24412119 | 8.35E-02    | 19.97846725 |
| 0.2708046  | 9.27E-02    | 20.15381706 |
| 0.30015636 | 0.10290882  | 20.28487732 |
| 0.33244329 | 0.114087402 | 20.37693353 |
| 0.36795891 | 0.126383842 | 20.43735835 |
| 0.4070261  | 0.139909926 | 20.47506133 |
| 0.45       | 0.154788619 | 20.5        |
| 4.46E-02   | 2.27E-02    | 13.3081197  |
| 5.16E-02   | 2.66E-02    | 14.04955861 |
| 5.94E-02   | 3.08E-02    | 14.74740003 |
| 6.80E-02   | 3.55E-02    | 15.4064523  |
| 0.07740396 | 4.06E-02    | 16.02946266 |
| 8.78E-02   | 4.63E-02    | 16.61763266 |
| 9.92E-02   | 0.052508092 | 17.17090597 |
| 0.11171    | 5.94E-02    | 17.68816732 |

|            |             |             |
|------------|-------------|-------------|
| 0.12550497 | 6.69E-02    | 18.16742545 |
| 0.14067943 | 7.52E-02    | 18.60602881 |
| 0.15737134 | 8.43E-02    | 19.00095168 |
| 0.17573244 | 9.43E-02    | 19.34917804 |
| 0.19592965 | 0.105315787 | 19.64819264 |
| 0.21814659 | 0.117440824 | 19.89655733 |
| 0.24258521 | 0.130778364 | 20.09450478 |
| 0.2694677  | 0.145449658 | 20.24442743 |
| 0.29903843 | 0.161588081 | 20.35109875 |
| 0.33156624 | 0.179340347 | 20.42147067 |
| 0.36734683 | 0.19886784  | 20.46398044 |
| 0.40670548 | 0.220348082 | 20.48747132 |
| 0.45       | 0.243976348 | 20.5        |
| 4.05E-02   | 2.94E-02    | 13.3090321  |
| 4.76E-02   | 3.48E-02    | 14.12872699 |
| 5.55E-02   | 4.09E-02    | 14.88803652 |
| 6.41E-02   | 4.75E-02    | 15.59513362 |
| 7.36E-02   | 5.47E-02    | 16.25482271 |
| 8.41E-02   | 6.27E-02    | 16.86957761 |
| 9.56E-02   | 7.15E-02    | 17.44009897 |
| 0.10828957 | 8.12E-02    | 17.96570493 |
| 0.12222402 | 9.18E-02    | 18.4446824  |
| 0.13755191 | 0.103526589 | 18.87466872 |
| 0.15441259 | 0.116399834 | 19.25310707 |
| 0.17295934 | 0.130560404 | 19.57779466 |
| 0.19336076 | 0.146137031 | 19.84750831 |

|            |             |             |
|------------|-------------|-------------|
| 0.21580233 | 0.163271321 | 20.06264471 |
| 0.24048805 | 0.182119039 | 20.22575741 |
| 0.26764235 | 0.202851529 | 20.34182736 |
| 0.29751207 | 0.225657269 | 20.41810088 |
| 0.33036877 | 0.250743582 | 20.46340107 |
| 0.36651113 | 0.278338527 | 20.48697537 |
| 0.40626774 | 0.308692966 | 20.49713011 |
| 0.45       | 0.342082849 | 20.5        |
| 3.54E-02   | 3.54E-02    | 13.31074378 |
| 4.26E-02   | 4.26E-02    | 14.23316521 |
| 5.06E-02   | 5.06E-02    | 15.07001869 |
| 5.93E-02   | 5.93E-02    | 15.83514482 |
| 6.90E-02   | 6.90E-02    | 16.53687455 |
| 7.96E-02   | 7.96E-02    | 17.17978587 |
| 9.12E-02   | 9.12E-02    | 17.76581318 |
| 0.10403809 | 0.104038095 | 18.29504466 |
| 0.11814591 | 0.118145911 | 18.76640168 |
| 0.13366451 | 0.133664508 | 19.17830706 |
| 0.15073497 | 0.150734965 | 19.52938912 |
| 0.16951247 | 0.169512468 | 19.81921446 |
| 0.19016772 | 0.190167721 | 20.04898635 |
| 0.2128885  | 0.212888499 | 20.22209137 |
| 0.23788136 | 0.237881356 | 20.34434226 |
| 0.2653735  | 0.265373497 | 20.42377445 |
| 0.29561485 | 0.295614853 | 20.46993224 |
| 0.32888034 | 0.328880345 | 20.49272773 |

|            |             |             |
|------------|-------------|-------------|
| 0.36547239 | 0.365472386 | 20.50113267 |
| 0.40572363 | 0.405723631 | 20.50208696 |
| 0.45       | 0.45        | 20.5        |
| 2.94E-02   | 4.05E-02    | 13.31239745 |
| 3.48E-02   | 4.76E-02    | 14.1329087  |
| 4.09E-02   | 5.55E-02    | 14.89321389 |
| 4.75E-02   | 6.41E-02    | 15.60106435 |
| 5.47E-02   | 7.36E-02    | 16.26124699 |
| 0.06272013 | 8.41E-02    | 16.87624715 |
| 7.15E-02   | 9.56E-02    | 17.44674431 |
| 8.12E-02   | 0.108289573 | 17.97201073 |
| 9.18E-02   | 0.122224019 | 18.45028787 |
| 0.10352659 | 0.137551911 | 18.879199   |
| 0.11639983 | 0.154412592 | 19.25623545 |
| 0.1305604  | 0.17295934  | 19.57932649 |
| 0.14613703 | 0.193360764 | 19.84746485 |
| 0.16327132 | 0.21580233  | 20.06131286 |
| 0.18211904 | 0.240488052 | 20.22366791 |
| 0.20285153 | 0.267642347 | 20.33963934 |
| 0.22565727 | 0.297512071 | 20.41640853 |
| 0.25074358 | 0.330368768 | 20.46252674 |
| 0.27833853 | 0.366511134 | 20.48684569 |
| 0.30869297 | 0.406267737 | 20.4973212  |
| 0.34208285 | 0.45        | 20.5        |
| 2.27E-02   | 4.46E-02    | 13.31272111 |
| 2.66E-02   | 5.16E-02    | 14.05507095 |

|            |             |             |
|------------|-------------|-------------|
| 3.08E-02   | 5.94E-02    | 14.7540889  |
| 3.55E-02   | 6.80E-02    | 15.4141662  |
| 4.06E-02   | 0.077403961 | 16.03795171 |
| 4.63E-02   | 8.78E-02    | 16.62662063 |
| 5.25E-02   | 9.92E-02    | 17.18008567 |
| 5.94E-02   | 0.111710002 | 17.69718197 |
| 6.69E-02   | 0.125504969 | 18.17586197 |
| 7.52E-02   | 0.140679432 | 18.61343603 |
| 8.43E-02   | 0.157371342 | 19.00688986 |
| 9.43E-02   | 0.175732442 | 19.3532985  |
| 0.10531579 | 0.195929653 | 19.65033388 |
| 0.11744082 | 0.218146585 | 19.89682977 |
| 0.13077836 | 0.24258521  | 20.09332404 |
| 0.14544966 | 0.269467698 | 20.24245817 |
| 0.16158808 | 0.299038434 | 20.34909511 |
| 0.17934035 | 0.331566244 | 20.42004627 |
| 0.19886784 | 0.367346835 | 20.46338858 |
| 0.22034808 | 0.406705485 | 20.48749112 |
| 0.24397635 | 0.45        | 20.5        |
| 1.55E-02   | 4.76E-02    | 13.31211084 |
| 1.79E-02   | 5.46E-02    | 14.00092639 |
| 2.06E-02   | 6.23E-02    | 14.65661    |
| 2.35E-02   | 7.08E-02    | 15.28184975 |
| 2.67E-02   | 8.02E-02    | 15.87815086 |
| 3.03E-02   | 9.05E-02    | 16.44596523 |
| 3.42E-02   | 0.101767151 | 16.98478882 |

|            |             |             |
|------------|-------------|-------------|
| 3.85E-02   | 0.11421516  | 17.4932495  |
| 0.04327191 | 0.12790797  | 17.96920962 |
| 4.85E-02   | 0.142970061 | 18.40990954 |
| 5.42E-02   | 0.159538361 | 18.81217877 |
| 6.05E-02   | 0.177763492 | 19.17273755 |
| 6.75E-02   | 0.197811135 | 19.48859979 |
| 7.51E-02   | 0.219863542 | 19.75756593 |
| 8.35E-02   | 0.244121191 | 19.97875968 |
| 9.27E-02   | 0.270804604 | 20.15312231 |
| 0.10290882 | 0.300156358 | 20.28374524 |
| 0.1140874  | 0.332443288 | 20.37592064 |
| 0.12638384 | 0.367958911 | 20.43684958 |
| 0.13990993 | 0.407026096 | 20.47508559 |
| 0.15478862 | 0.45        | 20.5        |
| 7.82E-03   | 4.94E-02    | 13.31100955 |
| 8.97E-03   | 5.64E-02    | 13.96987078 |
| 1.02E-02   | 6.41E-02    | 14.6008003  |
| 1.16E-02   | 7.25E-02    | 15.20573798 |
| 1.32E-02   | 8.18E-02    | 15.78567019 |
| 0.01484482 | 0.092087136 | 16.3407143  |
| 1.67E-02   | 0.103352005 | 16.87017685 |
| 1.87E-02   | 0.115743362 | 17.37260436 |
| 2.10E-02   | 0.129373854 | 17.84584668 |
| 2.34E-02   | 0.144367396 | 18.287155   |
| 2.62E-02   | 0.160860291 | 18.69333884 |
| 2.91E-02   | 0.179002477 | 19.06100525 |

|            |             |             |
|------------|-------------|-------------|
| 3.24E-02   | 0.19895888  | 19.38689708 |
| 3.60E-02   | 0.220910924 | 19.66833107 |
| 4.00E-02   | 0.245058173 | 19.90370977 |
| 4.44E-02   | 0.271620146 | 20.09304412 |
| 4.92E-02   | 0.300838317 | 20.2383886  |
| 5.45E-02   | 0.332978305 | 20.34408005 |
| 0.06027741 | 0.368332291 | 20.4167241  |
| 6.67E-02   | 0.407221676 | 20.46503922 |
| 7.37E-02   | 0.45        | 20.5        |
| 2.33E-15   | 0.05        | 13.30977482 |
| 2.29E-15   | 5.70E-02    | 13.95942454 |
| 2.25E-15   | 6.47E-02    | 14.58261411 |
| 2.20E-15   | 7.31E-02    | 15.18111975 |
| 2.15E-15   | 0.082412047 | 15.755805   |
| 2.09E-15   | 9.26E-02    | 16.30670512 |
| 2.02E-15   | 0.103884662 | 16.83308214 |
| 1.95E-15   | 0.116256978 | 17.33346935 |
| 1.87E-15   | 0.129866526 | 17.80572498 |
| 1.78E-15   | 0.144837029 | 18.24711682 |
| 1.68E-15   | 0.161304581 | 18.65446147 |
| 1.58E-15   | 0.179418889 | 19.02434207 |
| 1.46E-15   | 0.199344628 | 19.35342339 |
| 1.33E-15   | 0.221262941 | 19.63886992 |
| 1.19E-15   | 0.245373085 | 19.87884777 |
| 1.04E-15   | 0.271894243 | 20.0730563  |
| 8.69E-16   | 0.301067518 | 20.22319881 |

|            |             |             |
|------------|-------------|-------------|
| 6.82E-16   | 0.333158119 | 20.33328812 |
| 4.76E-16   | 0.368457781 | 20.40973733 |
| 2.49E-16   | 0.407287409 | 20.46137988 |
| -3.47E-32  | 0.45        | 20.5        |
| -7.82E-03  | 4.94E-02    | 13.30870162 |
| -8.97E-03  | 5.64E-02    | 13.96722209 |
| -1.02E-02  | 0.064073072 | 14.59768667 |
| -1.16E-02  | 7.25E-02    | 15.20216426 |
| -1.32E-02  | 8.18E-02    | 15.78169955 |
| -1.48E-02  | 9.21E-02    | 16.33643881 |
| -1.67E-02  | 0.103352005 | 16.86570931 |
| -1.87E-02  | 0.115743362 | 17.36807897 |
| -2.10E-02  | 0.129373854 | 17.84142074 |
| -2.34E-02  | 0.144367396 | 18.28300632 |
| -2.62E-02  | 0.160860291 | 18.68965492 |
| -2.91E-02  | 0.179002477 | 19.05796229 |
| -3.24E-02  | 0.19895888  | 19.38462948 |
| -0.0360318 | 0.220910924 | 19.66689675 |
| -4.00E-02  | 0.245058173 | 19.90306106 |
| -4.44E-02  | 0.271620146 | 20.09301777 |
| -4.92E-02  | 0.300838317 | 20.23872658 |
| -0.0544629 | 0.332978305 | 20.34448477 |
| -6.03E-02  | 0.368332291 | 20.41694276 |
| -0.0666733 | 0.407221676 | 20.46498427 |
| -7.37E-02  | 0.45        | 20.5        |
| -1.55E-02  | 4.76E-02    | 13.30806783 |



|            |             |             |
|------------|-------------|-------------|
| -1.79E-02  | 5.46E-02    | 13.99619657 |
| -2.06E-02  | 6.23E-02    | 14.65096912 |
| -2.35E-02  | 7.08E-02    | 15.2753481  |
| -2.67E-02  | 8.02E-02    | 15.8709402  |
| -3.03E-02  | 9.05E-02    | 16.43824035 |
| -3.42E-02  | 0.101767151 | 16.97677758 |
| -3.85E-02  | 0.11421516  | 17.48521905 |
| -4.33E-02  | 0.12790797  | 17.9614712  |
| -4.85E-02  | 0.142970061 | 18.40281103 |
| -5.42E-02  | 0.159538361 | 18.80607793 |
| -6.05E-02  | 0.177763492 | 19.16795341 |
| -6.75E-02  | 0.197811135 | 19.48534665 |
| -7.51E-02  | 0.219863542 | 19.75588409 |
| -8.35E-02  | 0.244121191 | 19.97846725 |
| -9.27E-02  | 0.270804604 | 20.15381706 |
| -0.1029088 | 0.300156358 | 20.28487732 |
| -0.1140874 | 0.332443288 | 20.37693353 |
| -0.1263838 | 0.367958911 | 20.43735835 |
| -0.1399099 | 0.407026096 | 20.47506133 |
| -0.1547886 | 0.45        | 20.5        |
| -2.27E-02  | 4.46E-02    | 13.3081197  |
| -2.66E-02  | 5.16E-02    | 14.04955861 |
| -3.08E-02  | 5.94E-02    | 14.74740003 |
| -3.55E-02  | 6.80E-02    | 15.4064523  |
| -4.06E-02  | 7.74E-02    | 16.02946266 |
| -4.63E-02  | 8.78E-02    | 16.61763266 |

|            |             |             |
|------------|-------------|-------------|
| -5.25E-02  | 9.92E-02    | 17.17090597 |
| -5.94E-02  | 0.111710002 | 17.68816732 |
| -6.69E-02  | 0.125504969 | 18.16742545 |
| -7.52E-02  | 0.140679432 | 18.60602881 |
| -8.43E-02  | 0.157371342 | 19.00095168 |
| -0.094293  | 0.175732442 | 19.34917804 |
| -0.1053158 | 0.195929653 | 19.64819264 |
| -0.1174408 | 0.218146585 | 19.89655733 |
| -0.1307784 | 0.24258521  | 20.09450478 |
| -0.1454497 | 0.269467698 | 20.24442743 |
| -0.1615881 | 0.299038434 | 20.35109875 |
| -0.1793403 | 0.331566244 | 20.42147067 |
| -0.1988678 | 0.367346835 | 20.46398044 |
| -0.2203481 | 0.406705485 | 20.48747132 |
| -0.2439763 | 0.45        | 20.5        |
| -0.0293893 | 4.05E-02    | 13.3090321  |
| -3.48E-02  | 4.76E-02    | 14.12872699 |
| -4.09E-02  | 0.055467056 | 14.88803652 |
| -4.75E-02  | 0.064119251 | 15.59513362 |
| -5.47E-02  | 7.36E-02    | 16.25482271 |
| -6.27E-02  | 8.41E-02    | 16.86957761 |
| -7.15E-02  | 9.56E-02    | 17.44009897 |
| -8.12E-02  | 0.108289573 | 17.96570493 |
| -9.18E-02  | 0.122224019 | 18.4446824  |
| -0.1035266 | 0.137551911 | 18.87466872 |
| -0.1163998 | 0.154412592 | 19.25310707 |

|            |             |             |
|------------|-------------|-------------|
| -0.1305604 | 0.17295934  | 19.57779466 |
| -0.146137  | 0.193360764 | 19.84750831 |
| -0.1632713 | 0.21580233  | 20.06264471 |
| -0.182119  | 0.240488052 | 20.22575741 |
| -0.2028515 | 0.267642347 | 20.34182736 |
| -0.2256573 | 0.297512071 | 20.41810088 |
| -0.2507436 | 0.330368768 | 20.46340107 |
| -0.2783385 | 0.366511134 | 20.48697537 |
| -0.308693  | 0.406267737 | 20.49713011 |
| -0.3420828 | 0.45        | 20.5        |
| -3.54E-02  | 3.54E-02    | 13.31074378 |
| -4.26E-02  | 4.26E-02    | 14.23316521 |
| -5.06E-02  | 5.06E-02    | 15.07001869 |
| -5.93E-02  | 5.93E-02    | 15.83514482 |
| -6.90E-02  | 6.90E-02    | 16.53687455 |
| -7.96E-02  | 7.96E-02    | 17.17978587 |
| -9.12E-02  | 9.12E-02    | 17.76581318 |
| -0.1040381 | 0.104038095 | 18.29504466 |
| -0.1181459 | 0.118145911 | 18.76640168 |
| -0.1336645 | 0.133664508 | 19.17830706 |
| -0.150735  | 0.150734965 | 19.52938912 |
| -0.1695125 | 0.169512468 | 19.81921446 |
| -0.1901677 | 0.190167721 | 20.04898635 |
| -0.2128885 | 0.212888499 | 20.22209137 |
| -0.2378814 | 0.237881356 | 20.34434226 |
| -0.2653735 | 0.265373497 | 20.42377445 |

|            |             |             |
|------------|-------------|-------------|
| -0.2956149 | 0.295614853 | 20.46993224 |
| -0.3288803 | 0.328880345 | 20.49272773 |
| -0.3654724 | 0.365472386 | 20.50113267 |
| -0.4057236 | 0.405723631 | 20.50208696 |
| -0.45      | 0.45        | 20.5        |
| -4.05E-02  | 2.94E-02    | 13.31239745 |
| -4.76E-02  | 3.48E-02    | 14.1329087  |
| -5.55E-02  | 4.09E-02    | 14.89321389 |
| -6.41E-02  | 4.75E-02    | 15.60106435 |
| -7.36E-02  | 5.47E-02    | 16.26124699 |
| -8.41E-02  | 6.27E-02    | 16.87624715 |
| -0.0956219 | 7.15E-02    | 17.44674431 |
| -0.1082896 | 8.12E-02    | 17.97201073 |
| -0.122224  | 9.18E-02    | 18.45028787 |
| -0.1375519 | 0.103526589 | 18.879199   |
| -0.1544126 | 0.116399834 | 19.25623545 |
| -0.1729593 | 0.130560404 | 19.57932649 |
| -0.1933608 | 0.146137031 | 19.84746485 |
| -0.2158023 | 0.163271321 | 20.06131286 |
| -0.2404881 | 0.182119039 | 20.22366791 |
| -0.2676423 | 0.202851529 | 20.33963934 |
| -0.2975121 | 0.225657269 | 20.41640853 |
| -0.3303688 | 0.250743582 | 20.46252674 |
| -0.3665111 | 0.278338527 | 20.48684569 |
| -0.4062677 | 0.308692966 | 20.4973212  |
| -0.45      | 0.342082849 | 20.5        |

|            |             |             |
|------------|-------------|-------------|
| -4.46E-02  | 2.27E-02    | 13.31272111 |
| -5.16E-02  | 2.66E-02    | 14.05507095 |
| -5.94E-02  | 3.08E-02    | 14.7540889  |
| -6.80E-02  | 3.55E-02    | 15.4141662  |
| -0.077404  | 4.06E-02    | 16.03795171 |
| -8.78E-02  | 4.63E-02    | 16.62662063 |
| -9.92E-02  | 5.25E-02    | 17.18008567 |
| -0.11171   | 5.94E-02    | 17.69718197 |
| -0.125505  | 6.69E-02    | 18.17586197 |
| -0.1406794 | 0.075162616 | 18.61343603 |
| -0.1573713 | 8.43E-02    | 19.00688986 |
| -0.1757324 | 9.43E-02    | 19.3532985  |
| -0.1959297 | 0.105315787 | 19.65033388 |
| -0.2181466 | 0.117440824 | 19.89682977 |
| -0.2425852 | 0.130778364 | 20.09332404 |
| -0.2694677 | 0.145449658 | 20.24245817 |
| -0.2990384 | 0.161588081 | 20.34909511 |
| -0.3315662 | 0.179340347 | 20.42004627 |
| -0.3673468 | 0.19886784  | 20.46338858 |
| -0.4067055 | 0.220348082 | 20.48749112 |
| -0.45      | 0.243976348 | 20.5        |
| -4.76E-02  | 1.55E-02    | 13.31211084 |
| -5.46E-02  | 1.79E-02    | 14.00092639 |
| -6.23E-02  | 2.06E-02    | 14.65661    |
| -7.08E-02  | 2.35E-02    | 15.28184975 |
| -8.02E-02  | 2.67E-02    | 15.87815086 |

|            |             |             |
|------------|-------------|-------------|
| -9.05E-02  | 3.03E-02    | 16.44596523 |
| -0.1017672 | 3.42E-02    | 16.98478882 |
| -0.1142152 | 0.038531099 | 17.4932495  |
| -0.127908  | 4.33E-02    | 17.96920962 |
| -0.1429701 | 0.0484868   | 18.40990954 |
| -0.1595384 | 5.42E-02    | 18.81217877 |
| -0.1777635 | 6.05E-02    | 19.17273755 |
| -0.1978111 | 6.75E-02    | 19.48859979 |
| -0.2198635 | 7.51E-02    | 19.75756593 |
| -0.2441212 | 8.35E-02    | 19.97875968 |
| -0.2708046 | 9.27E-02    | 20.15312231 |
| -0.3001564 | 0.10290882  | 20.28374524 |
| -0.3324433 | 0.114087402 | 20.37592064 |
| -0.3679589 | 0.126383842 | 20.43684958 |
| -0.4070261 | 0.139909926 | 20.47508559 |
| -0.45      | 0.154788619 | 20.5        |
| -4.94E-02  | 7.82E-03    | 13.31100955 |
| -5.64E-02  | 8.97E-03    | 13.96987078 |
| -0.0640731 | 1.02E-02    | 14.6008003  |
| -7.25E-02  | 1.16E-02    | 15.20573798 |
| -8.18E-02  | 1.32E-02    | 15.78567019 |
| -9.21E-02  | 1.48E-02    | 16.3407143  |
| -0.103352  | 1.67E-02    | 16.87017685 |
| -0.1157434 | 1.87E-02    | 17.37260436 |
| -0.1293739 | 0.020977166 | 17.84584668 |
| -0.1443674 | 0.023443075 | 18.287155   |

|            |             |             |
|------------|-------------|-------------|
| -0.1608603 | 2.62E-02    | 18.69333884 |
| -0.1790025 | 0.029139325 | 19.06100525 |
| -0.1989589 | 3.24E-02    | 19.38689708 |
| -0.2209109 | 3.60E-02    | 19.66833107 |
| -0.2450582 | 4.00E-02    | 19.90370977 |
| -0.2716201 | 4.44E-02    | 20.09304412 |
| -0.3008383 | 4.92E-02    | 20.2383886  |
| -0.3329783 | 0.054462922 | 20.34408005 |
| -0.3683323 | 6.03E-02    | 20.4167241  |
| -0.4072217 | 6.67E-02    | 20.46503922 |
| -0.45      | 7.37E-02    | 20.5        |
| -0.05      | 4.67E-15    | 13.30977482 |
| -5.70E-02  | 4.59E-15    | 13.95942454 |
| -6.47E-02  | 4.50E-15    | 14.58261411 |
| -7.31E-02  | 4.40E-15    | 15.18111975 |
| -0.082412  | 4.29E-15    | 15.755805   |
| -9.26E-02  | 4.17E-15    | 16.30670512 |
| -0.1038847 | 4.04E-15    | 16.83308214 |
| -0.116257  | 3.90E-15    | 17.33346935 |
| -0.1298665 | 3.74E-15    | 17.80572498 |
| -0.144837  | 3.56E-15    | 18.24711682 |
| -0.1613046 | 3.37E-15    | 18.65446147 |
| -0.1794189 | 3.16E-15    | 19.02434207 |
| -0.1993446 | 2.93E-15    | 19.35342339 |
| -0.2212629 | 2.67E-15    | 19.63886992 |
| -0.2453731 | 2.39E-15    | 19.87884777 |

|            |              |             |
|------------|--------------|-------------|
| -0.2718942 | 2.08E-15     | 20.0730563  |
| -0.3010675 | 1.74E-15     | 20.22319881 |
| -0.3331581 | 1.36E-15     | 20.33328812 |
| -0.3684578 | 9.52E-16     | 20.40973733 |
| -0.4072874 | 4.99E-16     | 20.46137988 |
| -0.45      | -6.93E-32    | 20.5        |
| -4.94E-02  | -7.82E-03    | 13.30870162 |
| -5.64E-02  | -8.97E-03    | 13.96722209 |
| -6.41E-02  | -1.02E-02    | 14.59768667 |
| -7.25E-02  | -0.011629431 | 15.20216426 |
| -8.18E-02  | -1.32E-02    | 15.78169955 |
| -0.0920871 | -1.48E-02    | 16.33643881 |
| -0.103352  | -1.67E-02    | 16.86570931 |
| -0.1157434 | -1.87E-02    | 17.36807897 |
| -0.1293739 | -2.10E-02    | 17.84142074 |
| -0.1443674 | -2.34E-02    | 18.28300632 |
| -0.1608603 | -2.62E-02    | 18.68965492 |
| -0.1790025 | -2.91E-02    | 19.05796229 |
| -0.1989589 | -3.24E-02    | 19.38462948 |
| -0.2209109 | -3.60E-02    | 19.66689675 |
| -0.2450582 | -4.00E-02    | 19.90306106 |
| -0.2716201 | -4.44E-02    | 20.09301777 |
| -0.3008383 | -0.049177027 | 20.23872658 |
| -0.3329783 | -5.45E-02    | 20.34448477 |
| -0.3683323 | -6.03E-02    | 20.41694276 |
| -0.4072217 | -6.67E-02    | 20.46498427 |



|            |              |             |
|------------|--------------|-------------|
| -0.45      | -7.37E-02    | 20.5        |
| -4.76E-02  | -1.55E-02    | 13.30806783 |
| -5.46E-02  | -1.79E-02    | 13.99619657 |
| -6.23E-02  | -2.06E-02    | 14.65096912 |
| -7.08E-02  | -2.35E-02    | 15.2753481  |
| -8.02E-02  | -2.67E-02    | 15.8709402  |
| -9.05E-02  | -3.03E-02    | 16.43824035 |
| -0.1017672 | -3.42E-02    | 16.97677758 |
| -0.1142152 | -3.85E-02    | 17.48521905 |
| -0.127908  | -4.33E-02    | 17.9614712  |
| -0.1429701 | -4.85E-02    | 18.40281103 |
| -0.1595384 | -5.42E-02    | 18.80607793 |
| -0.1777635 | -6.05E-02    | 19.16795341 |
| -0.1978111 | -6.75E-02    | 19.48534665 |
| -0.2198635 | -7.51E-02    | 19.75588409 |
| -0.2441212 | -8.35E-02    | 19.97846725 |
| -0.2708046 | -9.27E-02    | 20.15381706 |
| -0.3001564 | -0.10290882  | 20.28487732 |
| -0.3324433 | -0.114087402 | 20.37693353 |
| -0.3679589 | -0.126383842 | 20.43735835 |
| -0.4070261 | -0.139909926 | 20.47506133 |
| -0.45      | -0.154788619 | 20.5        |
| -4.46E-02  | -2.27E-02    | 13.3081197  |
| -5.16E-02  | -2.66E-02    | 14.04955861 |
| -5.94E-02  | -3.08E-02    | 14.74740003 |
| -6.80E-02  | -3.55E-02    | 15.4064523  |

|            |              |             |
|------------|--------------|-------------|
| -7.74E-02  | -4.06E-02    | 16.02946266 |
| -8.78E-02  | -4.63E-02    | 16.61763266 |
| -9.92E-02  | -5.25E-02    | 17.17090597 |
| -0.11171   | -5.94E-02    | 17.68816732 |
| -0.125505  | -6.69E-02    | 18.16742545 |
| -0.1406794 | -7.52E-02    | 18.60602881 |
| -0.1573713 | -8.43E-02    | 19.00095168 |
| -0.1757324 | -9.43E-02    | 19.34917804 |
| -0.1959297 | -0.105315787 | 19.64819264 |
| -0.2181466 | -0.117440824 | 19.89655733 |
| -0.2425852 | -0.130778364 | 20.09450478 |
| -0.2694677 | -0.145449658 | 20.24442743 |
| -0.2990384 | -0.161588081 | 20.35109875 |
| -0.3315662 | -0.179340347 | 20.42147067 |
| -0.3673468 | -0.19886784  | 20.46398044 |
| -0.4067055 | -0.220348082 | 20.48747132 |
| -0.45      | -0.243976348 | 20.5        |
| -4.05E-02  | -2.94E-02    | 13.3090321  |
| -4.76E-02  | -3.48E-02    | 14.12872699 |
| -5.55E-02  | -4.09E-02    | 14.88803652 |
| -6.41E-02  | -4.75E-02    | 15.59513362 |
| -7.36E-02  | -5.47E-02    | 16.25482271 |
| -8.41E-02  | -0.062720133 | 16.86957761 |
| -9.56E-02  | -7.15E-02    | 17.44009897 |
| -0.1082896 | -8.12E-02    | 17.96570493 |
| -0.122224  | -9.18E-02    | 18.4446824  |

|            |              |             |
|------------|--------------|-------------|
| -0.1375519 | -0.103526589 | 18.87466872 |
| -0.1544126 | -0.116399834 | 19.25310707 |
| -0.1729593 | -0.130560404 | 19.57779466 |
| -0.1933608 | -0.146137031 | 19.84750831 |
| -0.2158023 | -0.163271321 | 20.06264471 |
| -0.2404881 | -0.182119039 | 20.22575741 |
| -0.2676423 | -0.202851529 | 20.34182736 |
| -0.2975121 | -0.225657269 | 20.41810088 |
| -0.3303688 | -0.250743582 | 20.46340107 |
| -0.3665111 | -0.278338527 | 20.48697537 |
| -0.4062677 | -0.308692966 | 20.49713011 |
| -0.45      | -0.342082849 | 20.5        |
| -3.54E-02  | -3.54E-02    | 13.31074378 |
| -0.0425949 | -4.26E-02    | 14.23316521 |
| -5.06E-02  | -0.050558373 | 15.07001869 |
| -5.93E-02  | -5.93E-02    | 15.83514482 |
| -6.90E-02  | -6.90E-02    | 16.53687455 |
| -7.96E-02  | -7.96E-02    | 17.17978587 |
| -9.12E-02  | -9.12E-02    | 17.76581318 |
| -0.1040381 | -0.104038095 | 18.29504466 |
| -0.1181459 | -0.118145911 | 18.76640168 |
| -0.1336645 | -0.133664508 | 19.17830706 |
| -0.150735  | -0.150734965 | 19.52938912 |
| -0.1695125 | -0.169512468 | 19.81921446 |
| -0.1901677 | -0.190167721 | 20.04898635 |
| -0.2128885 | -0.212888499 | 20.22209137 |

|            |              |             |
|------------|--------------|-------------|
| -0.2378814 | -0.237881356 | 20.34434226 |
| -0.2653735 | -0.265373497 | 20.42377445 |
| -0.2956149 | -0.295614853 | 20.46993224 |
| -0.3288803 | -0.328880345 | 20.49272773 |
| -0.3654724 | -0.365472386 | 20.50113267 |
| -0.4057236 | -0.405723631 | 20.50208696 |
| -0.45      | -0.45        | 20.5        |
| -2.94E-02  | -4.05E-02    | 13.31239745 |
| -3.48E-02  | -4.76E-02    | 14.1329087  |
| -4.09E-02  | -5.55E-02    | 14.89321389 |
| -4.75E-02  | -6.41E-02    | 15.60106435 |
| -0.0547269 | -7.36E-02    | 16.26124699 |
| -6.27E-02  | -8.41E-02    | 16.87624715 |
| -0.0715127 | -9.56E-02    | 17.44674431 |
| -8.12E-02  | -0.108289573 | 17.97201073 |
| -9.18E-02  | -0.122224019 | 18.45028787 |
| -0.1035266 | -0.137551911 | 18.879199   |
| -0.1163998 | -0.154412592 | 19.25623545 |
| -0.1305604 | -0.17295934  | 19.57932649 |
| -0.146137  | -0.193360764 | 19.84746485 |
| -0.1632713 | -0.21580233  | 20.06131286 |
| -0.182119  | -0.240488052 | 20.22366791 |
| -0.2028515 | -0.267642347 | 20.33963934 |
| -0.2256573 | -0.297512071 | 20.41640853 |
| -0.2507436 | -0.330368768 | 20.46252674 |
| -0.2783385 | -0.366511134 | 20.48684569 |

|            |              |             |
|------------|--------------|-------------|
| -0.308693  | -0.406267737 | 20.4973212  |
| -0.3420828 | -0.45        | 20.5        |
| -0.0226995 | -4.46E-02    | 13.31272111 |
| -2.66E-02  | -5.16E-02    | 14.05507095 |
| -3.08E-02  | -5.94E-02    | 14.7540889  |
| -3.55E-02  | -6.80E-02    | 15.4141662  |
| -4.06E-02  | -0.077403961 | 16.03795171 |
| -4.63E-02  | -8.78E-02    | 16.62662063 |
| -5.25E-02  | -9.92E-02    | 17.18008567 |
| -5.94E-02  | -0.111710002 | 17.69718197 |
| -6.69E-02  | -0.125504969 | 18.17586197 |
| -7.52E-02  | -0.140679432 | 18.61343603 |
| -8.43E-02  | -0.157371342 | 19.00688986 |
| -9.43E-02  | -0.175732442 | 19.3532985  |
| -0.1053158 | -0.195929653 | 19.65033388 |
| -0.1174408 | -0.218146585 | 19.89682977 |
| -0.1307784 | -0.24258521  | 20.09332404 |
| -0.1454497 | -0.269467698 | 20.24245817 |
| -0.1615881 | -0.299038434 | 20.34909511 |
| -0.1793403 | -0.331566244 | 20.42004627 |
| -0.1988678 | -0.367346835 | 20.46338858 |
| -0.2203481 | -0.406705485 | 20.48749112 |
| -0.2439763 | -0.45        | 20.5        |
| -1.55E-02  | -4.76E-02    | 13.31211084 |
| -1.79E-02  | -5.46E-02    | 14.00092639 |
| -0.0205597 | -6.23E-02    | 14.65661    |

|            |              |             |
|------------|--------------|-------------|
| -2.35E-02  | -0.070810795 | 15.28184975 |
| -2.67E-02  | -8.02E-02    | 15.87815086 |
| -3.03E-02  | -9.05E-02    | 16.44596523 |
| -3.42E-02  | -0.101767151 | 16.98478882 |
| -3.85E-02  | -0.11421516  | 17.4932495  |
| -4.33E-02  | -0.12790797  | 17.96920962 |
| -4.85E-02  | -0.142970061 | 18.40990954 |
| -5.42E-02  | -0.159538361 | 18.81217877 |
| -6.05E-02  | -0.177763492 | 19.17273755 |
| -6.75E-02  | -0.197811135 | 19.48859979 |
| -7.51E-02  | -0.219863542 | 19.75756593 |
| -8.35E-02  | -0.244121191 | 19.97875968 |
| -9.27E-02  | -0.270804604 | 20.15312231 |
| -0.1029088 | -0.300156358 | 20.28374524 |
| -0.1140874 | -0.332443288 | 20.37592064 |
| -0.1263838 | -0.367958911 | 20.43684958 |
| -0.1399099 | -0.407026096 | 20.47508559 |
| -0.1547886 | -0.45        | 20.5        |
| -7.82E-03  | -4.94E-02    | 13.31100955 |
| -8.97E-03  | -0.056379015 | 13.96987078 |
| -1.02E-02  | -6.41E-02    | 14.6008003  |
| -1.16E-02  | -7.25E-02    | 15.20573798 |
| -1.32E-02  | -0.081846345 | 15.78567019 |
| -1.48E-02  | -9.21E-02    | 16.3407143  |
| -1.67E-02  | -0.103352005 | 16.87017685 |
| -1.87E-02  | -0.115743362 | 17.37260436 |

|            |              |             |
|------------|--------------|-------------|
| -2.10E-02  | -0.129373854 | 17.84584668 |
| -2.34E-02  | -0.144367396 | 18.287155   |
| -2.62E-02  | -0.160860291 | 18.69333884 |
| -2.91E-02  | -0.179002477 | 19.06100525 |
| -3.24E-02  | -0.19895888  | 19.38689708 |
| -3.60E-02  | -0.220910924 | 19.66833107 |
| -0.0400032 | -0.245058173 | 19.90370977 |
| -4.44E-02  | -0.271620146 | 20.09304412 |
| -4.92E-02  | -0.300838317 | 20.2383886  |
| -5.45E-02  | -0.332978305 | 20.34408005 |
| -0.0602774 | -0.368332291 | 20.4167241  |
| -6.67E-02  | -0.407221676 | 20.46503922 |
| -7.37E-02  | -0.45        | 20.5        |
| -7.03E-15  | -0.05        | 13.30977482 |
| -6.90E-15  | -5.70E-02    | 13.95942454 |
| -6.77E-15  | -6.47E-02    | 14.58261411 |
| -6.62E-15  | -7.31E-02    | 15.18111975 |
| -6.46E-15  | -0.082412047 | 15.755805   |
| -6.28E-15  | -9.26E-02    | 16.30670512 |
| -6.08E-15  | -0.103884662 | 16.83308214 |
| -5.86E-15  | -0.116256978 | 17.33346935 |
| -5.62E-15  | -0.129866526 | 17.80572498 |
| -5.36E-15  | -0.144837029 | 18.24711682 |
| -5.07E-15  | -0.161304581 | 18.65446147 |
| -4.75E-15  | -0.179418889 | 19.02434207 |
| -4.40E-15  | -0.199344628 | 19.35342339 |

|            |              |             |
|------------|--------------|-------------|
| -4.02E-15  | -0.221262941 | 19.63886992 |
| -3.59E-15  | -0.245373085 | 19.87884777 |
| -3.13E-15  | -0.271894243 | 20.0730563  |
| -2.62E-15  | -0.301067518 | 20.22319881 |
| -2.05E-15  | -0.333158119 | 20.33328812 |
| -1.43E-15  | -0.368457781 | 20.40973733 |
| -7.50E-16  | -0.407287409 | 20.46137988 |
| 3.46E-31   | -0.45        | 20.5        |
| 7.82E-03   | -0.049384417 | 13.30870162 |
| 8.97E-03   | -5.64E-02    | 13.96722209 |
| 0.01023749 | -6.41E-02    | 14.59768667 |
| 1.16E-02   | -7.25E-02    | 15.20216426 |
| 1.32E-02   | -0.081846345 | 15.78169955 |
| 1.48E-02   | -9.21E-02    | 16.33643881 |
| 1.67E-02   | -0.103352005 | 16.86570931 |
| 1.87E-02   | -0.115743362 | 17.36807897 |
| 2.10E-02   | -0.129373854 | 17.84142074 |
| 2.34E-02   | -0.144367396 | 18.28300632 |
| 2.62E-02   | -0.160860291 | 18.68965492 |
| 2.91E-02   | -0.179002477 | 19.05796229 |
| 3.24E-02   | -0.19895888  | 19.38462948 |
| 3.60E-02   | -0.220910924 | 19.66689675 |
| 0.04000316 | -0.245058173 | 19.90306106 |
| 4.44E-02   | -0.271620146 | 20.09301777 |
| 4.92E-02   | -0.300838317 | 20.23872658 |
| 5.45E-02   | -0.332978305 | 20.34448477 |



|            |              |             |
|------------|--------------|-------------|
| 6.03E-02   | -0.368332291 | 20.41694276 |
| 6.67E-02   | -0.407221676 | 20.46498427 |
| 7.37E-02   | -0.45        | 20.5        |
| 1.55E-02   | -0.047552826 | 13.30806783 |
| 1.79E-02   | -5.46E-02    | 13.99619657 |
| 2.06E-02   | -6.23E-02    | 14.65096912 |
| 2.35E-02   | -7.08E-02    | 15.2753481  |
| 2.67E-02   | -8.02E-02    | 15.8709402  |
| 3.03E-02   | -9.05E-02    | 16.43824035 |
| 3.42E-02   | -0.101767151 | 16.97677758 |
| 3.85E-02   | -0.11421516  | 17.48521905 |
| 4.33E-02   | -0.12790797  | 17.9614712  |
| 4.85E-02   | -0.142970061 | 18.40281103 |
| 5.42E-02   | -0.159538361 | 18.80607793 |
| 6.05E-02   | -0.177763492 | 19.16795341 |
| 6.75E-02   | -0.197811135 | 19.48534665 |
| 7.51E-02   | -0.219863542 | 19.75588409 |
| 8.35E-02   | -0.244121191 | 19.97846725 |
| 9.27E-02   | -0.270804604 | 20.15381706 |
| 0.10290882 | -0.300156358 | 20.28487732 |
| 0.1140874  | -0.332443288 | 20.37693353 |
| 0.12638384 | -0.367958911 | 20.43735835 |
| 0.13990993 | -0.407026096 | 20.47506133 |
| 0.15478862 | -0.45        | 20.5        |
| 2.27E-02   | -4.46E-02    | 13.3081197  |
| 2.66E-02   | -5.16E-02    | 14.04955861 |

|            |              |             |
|------------|--------------|-------------|
| 3.08E-02   | -5.94E-02    | 14.74740003 |
| 3.55E-02   | -6.80E-02    | 15.4064523  |
| 0.04062961 | -7.74E-02    | 16.02946266 |
| 4.63E-02   | -8.78E-02    | 16.61763266 |
| 5.25E-02   | -0.099169123 | 17.17090597 |
| 5.94E-02   | -0.111710002 | 17.68816732 |
| 6.69E-02   | -0.125504969 | 18.16742545 |
| 7.52E-02   | -0.140679432 | 18.60602881 |
| 8.43E-02   | -0.157371342 | 19.00095168 |
| 9.43E-02   | -0.175732442 | 19.34917804 |
| 0.10531579 | -0.195929653 | 19.64819264 |
| 0.11744082 | -0.218146585 | 19.89655733 |
| 0.13077836 | -0.24258521  | 20.09450478 |
| 0.14544966 | -0.269467698 | 20.24442743 |
| 0.16158808 | -0.299038434 | 20.35109875 |
| 0.17934035 | -0.331566244 | 20.42147067 |
| 0.19886784 | -0.367346835 | 20.46398044 |
| 0.22034808 | -0.406705485 | 20.48747132 |
| 0.24397635 | -0.45        | 20.5        |
| 2.94E-02   | -0.04045085  | 13.3090321  |
| 3.48E-02   | -4.76E-02    | 14.12872699 |
| 4.09E-02   | -5.55E-02    | 14.88803652 |
| 4.75E-02   | -6.41E-02    | 15.59513362 |
| 5.47E-02   | -7.36E-02    | 16.25482271 |
| 6.27E-02   | -0.084105822 | 16.86957761 |
| 7.15E-02   | -9.56E-02    | 17.44009897 |

|            |              |             |
|------------|--------------|-------------|
| 0.08118459 | -0.108289573 | 17.96570493 |
| 9.18E-02   | -0.122224019 | 18.4446824  |
| 0.10352659 | -0.137551911 | 18.87466872 |
| 0.11639983 | -0.154412592 | 19.25310707 |
| 0.1305604  | -0.17295934  | 19.57779466 |
| 0.14613703 | -0.193360764 | 19.84750831 |
| 0.16327132 | -0.21580233  | 20.06264471 |
| 0.18211904 | -0.240488052 | 20.22575741 |
| 0.20285153 | -0.267642347 | 20.34182736 |
| 0.22565727 | -0.297512071 | 20.41810088 |
| 0.25074358 | -0.330368768 | 20.46340107 |
| 0.27833853 | -0.366511134 | 20.48697537 |
| 0.30869297 | -0.406267737 | 20.49713011 |
| 0.34208285 | -0.45        | 20.5        |
| 3.54E-02   | -3.54E-02    | 13.31074378 |
| 4.26E-02   | -4.26E-02    | 14.23316521 |
| 5.06E-02   | -5.06E-02    | 15.07001869 |
| 5.93E-02   | -5.93E-02    | 15.83514482 |
| 6.90E-02   | -6.90E-02    | 16.53687455 |
| 7.96E-02   | -7.96E-02    | 17.17978587 |
| 0.09121281 | -0.091212808 | 17.76581318 |
| 0.10403809 | -0.104038095 | 18.29504466 |
| 0.11814591 | -0.118145911 | 18.76640168 |
| 0.13366451 | -0.133664508 | 19.17830706 |
| 0.15073497 | -0.150734965 | 19.52938912 |
| 0.16951247 | -0.169512468 | 19.81921446 |

|            |              |             |
|------------|--------------|-------------|
| 0.19016772 | -0.190167721 | 20.04898635 |
| 0.2128885  | -0.212888499 | 20.22209137 |
| 0.23788136 | -0.237881356 | 20.34434226 |
| 0.2653735  | -0.265373497 | 20.42377445 |
| 0.29561485 | -0.295614853 | 20.46993224 |
| 0.32888034 | -0.328880345 | 20.49272773 |
| 0.36547239 | -0.365472386 | 20.50113267 |
| 0.40572363 | -0.405723631 | 20.50208696 |
| 0.45       | -0.45        | 20.5        |
| 4.05E-02   | -2.94E-02    | 13.31239745 |
| 4.76E-02   | -3.48E-02    | 14.1329087  |
| 5.55E-02   | -4.09E-02    | 14.89321389 |
| 6.41E-02   | -4.75E-02    | 15.60106435 |
| 7.36E-02   | -5.47E-02    | 16.26124699 |
| 8.41E-02   | -6.27E-02    | 16.87624715 |
| 9.56E-02   | -7.15E-02    | 17.44674431 |
| 0.10828957 | -0.081184593 | 17.97201073 |
| 0.12222402 | -9.18E-02    | 18.45028787 |
| 0.13755191 | -0.103526589 | 18.879199   |
| 0.15441259 | -0.116399834 | 19.25623545 |
| 0.17295934 | -0.130560404 | 19.57932649 |
| 0.19336076 | -0.146137031 | 19.84746485 |
| 0.21580233 | -0.163271321 | 20.06131286 |
| 0.24048805 | -0.182119039 | 20.22366791 |
| 0.26764235 | -0.202851529 | 20.33963934 |
| 0.29751207 | -0.225657269 | 20.41640853 |

|            |              |             |
|------------|--------------|-------------|
| 0.33036877 | -0.250743582 | 20.46252674 |
| 0.36651113 | -0.278338527 | 20.48684569 |
| 0.40626774 | -0.308692966 | 20.4973212  |
| 0.45       | -0.342082849 | 20.5        |
| 4.46E-02   | -0.022699525 | 13.31272111 |
| 5.16E-02   | -2.66E-02    | 14.05507095 |
| 5.94E-02   | -3.08E-02    | 14.7540889  |
| 6.80E-02   | -3.55E-02    | 15.4141662  |
| 7.74E-02   | -4.06E-02    | 16.03795171 |
| 8.78E-02   | -4.63E-02    | 16.62662063 |
| 9.92E-02   | -5.25E-02    | 17.18008567 |
| 0.11171    | -0.059352359 | 17.69718197 |
| 0.12550497 | -6.69E-02    | 18.17586197 |
| 0.14067943 | -7.52E-02    | 18.61343603 |
| 0.15737134 | -8.43E-02    | 19.00688986 |
| 0.17573244 | -9.43E-02    | 19.3532985  |
| 0.19592965 | -0.105315787 | 19.65033388 |
| 0.21814659 | -0.117440824 | 19.89682977 |
| 0.24258521 | -0.130778364 | 20.09332404 |
| 0.2694677  | -0.145449658 | 20.24245817 |
| 0.29903843 | -0.161588081 | 20.34909511 |
| 0.33156624 | -0.179340347 | 20.42004627 |
| 0.36734683 | -0.19886784  | 20.46338858 |
| 0.40670548 | -0.220348082 | 20.48749112 |
| 0.45       | -0.243976348 | 20.5        |
| 4.76E-02   | -1.55E-02    | 13.31211084 |

|            |              |             |
|------------|--------------|-------------|
| 5.46E-02   | -1.79E-02    | 14.00092639 |
| 0.06230864 | -2.06E-02    | 14.65661    |
| 7.08E-02   | -0.023503369 | 15.28184975 |
| 8.02E-02   | -0.026741406 | 15.87815086 |
| 9.05E-02   | -3.03E-02    | 16.44596523 |
| 0.10176715 | -3.42E-02    | 16.98478882 |
| 0.11421516 | -3.85E-02    | 17.4932495  |
| 0.12790797 | -4.33E-02    | 17.96920962 |
| 0.14297006 | -4.85E-02    | 18.40990954 |
| 0.15953836 | -5.42E-02    | 18.81217877 |
| 0.17776349 | -6.05E-02    | 19.17273755 |
| 0.19781113 | -6.75E-02    | 19.48859979 |
| 0.21986354 | -7.51E-02    | 19.75756593 |
| 0.24412119 | -8.35E-02    | 19.97875968 |
| 0.2708046  | -9.27E-02    | 20.15312231 |
| 0.30015636 | -0.10290882  | 20.28374524 |
| 0.33244329 | -0.114087402 | 20.37592064 |
| 0.36795891 | -0.126383842 | 20.43684958 |
| 0.4070261  | -0.139909926 | 20.47508559 |
| 0.45       | -0.154788619 | 20.5        |
| 4.94E-02   | -7.82E-03    | 13.31100955 |
| 5.64E-02   | -8.97E-03    | 13.96987078 |
| 6.41E-02   | -1.02E-02    | 14.6008003  |
| 7.25E-02   | -0.011629431 | 15.20573798 |
| 8.18E-02   | -1.32E-02    | 15.78567019 |
| 0.09208714 | -1.48E-02    | 16.3407143  |

|            |              |             |
|------------|--------------|-------------|
| 0.10335201 | -1.67E-02    | 16.87017685 |
| 0.11574336 | -1.87E-02    | 17.37260436 |
| 0.12937385 | -2.10E-02    | 17.84584668 |
| 0.1443674  | -2.34E-02    | 18.287155   |
| 0.16086029 | -2.62E-02    | 18.69333884 |
| 0.17900248 | -2.91E-02    | 19.06100525 |
| 0.19895888 | -3.24E-02    | 19.38689708 |
| 0.22091092 | -3.60E-02    | 19.66833107 |
| 0.24505817 | -4.00E-02    | 19.90370977 |
| 0.27162015 | -0.044371668 | 20.09304412 |
| 0.30083832 | -4.92E-02    | 20.2383886  |
| 0.3329783  | -5.45E-02    | 20.34408005 |
| 0.36833229 | -6.03E-02    | 20.4167241  |
| 0.40722168 | -6.67E-02    | 20.46503922 |
| 0.45       | -7.37E-02    | 20.5        |
| 1          | 2            | 22          |
| 2          | 23           | 22          |
| 2          | 3            | 23          |
| 3          | 24           | 23          |
| 3          | 4            | 24          |
| 4          | 25           | 24          |
| 4          | 5            | 25          |
| 5          | 26           | 25          |
| 5          | 6            | 26          |
| 6          | 27           | 26          |
| 6          | 7            | 27          |

|    |    |    |
|----|----|----|
| 7  | 28 | 27 |
| 7  | 8  | 28 |
| 8  | 29 | 28 |
| 8  | 9  | 29 |
| 9  | 30 | 29 |
| 9  | 10 | 30 |
| 10 | 31 | 30 |
| 10 | 11 | 31 |
| 11 | 32 | 31 |
| 11 | 12 | 32 |
| 12 | 33 | 32 |
| 12 | 13 | 33 |
| 13 | 34 | 33 |
| 13 | 14 | 34 |
| 14 | 35 | 34 |
| 14 | 15 | 35 |
| 15 | 36 | 35 |
| 15 | 16 | 36 |
| 16 | 37 | 36 |
| 16 | 17 | 37 |
| 17 | 38 | 37 |
| 17 | 18 | 38 |
| 18 | 39 | 38 |
| 18 | 19 | 39 |
| 19 | 40 | 39 |
| 19 | 20 | 40 |



|    |    |    |
|----|----|----|
| 20 | 41 | 40 |
| 20 | 21 | 41 |
| 21 | 42 | 41 |
| 22 | 23 | 43 |
| 23 | 44 | 43 |
| 23 | 24 | 44 |
| 24 | 45 | 44 |
| 24 | 25 | 45 |
| 25 | 46 | 45 |
| 25 | 26 | 46 |
| 26 | 47 | 46 |
| 26 | 27 | 47 |
| 27 | 48 | 47 |
| 27 | 28 | 48 |
| 28 | 49 | 48 |
| 28 | 29 | 49 |
| 29 | 50 | 49 |
| 29 | 30 | 50 |
| 30 | 51 | 50 |
| 30 | 31 | 51 |
| 31 | 52 | 51 |
| 31 | 32 | 52 |
| 32 | 53 | 52 |
| 32 | 33 | 53 |
| 33 | 54 | 53 |
| 33 | 34 | 54 |

|    |    |    |
|----|----|----|
| 34 | 55 | 54 |
| 34 | 35 | 55 |
| 35 | 56 | 55 |
| 35 | 36 | 56 |
| 36 | 57 | 56 |
| 36 | 37 | 57 |
| 37 | 58 | 57 |
| 37 | 38 | 58 |
| 38 | 59 | 58 |
| 38 | 39 | 59 |
| 39 | 60 | 59 |
| 39 | 40 | 60 |
| 40 | 61 | 60 |
| 40 | 41 | 61 |
| 41 | 62 | 61 |
| 41 | 42 | 62 |
| 42 | 63 | 62 |
| 43 | 44 | 64 |
| 44 | 65 | 64 |
| 44 | 45 | 65 |
| 45 | 66 | 65 |
| 45 | 46 | 66 |
| 46 | 67 | 66 |
| 46 | 47 | 67 |
| 47 | 68 | 67 |
| 47 | 48 | 68 |

|    |    |    |
|----|----|----|
| 48 | 69 | 68 |
| 48 | 49 | 69 |
| 49 | 70 | 69 |
| 49 | 50 | 70 |
| 50 | 71 | 70 |
| 50 | 51 | 71 |
| 51 | 72 | 71 |
| 51 | 52 | 72 |
| 52 | 73 | 72 |
| 52 | 53 | 73 |
| 53 | 74 | 73 |
| 53 | 54 | 74 |
| 54 | 75 | 74 |
| 54 | 55 | 75 |
| 55 | 76 | 75 |
| 55 | 56 | 76 |
| 56 | 77 | 76 |
| 56 | 57 | 77 |
| 57 | 78 | 77 |
| 57 | 58 | 78 |
| 58 | 79 | 78 |
| 58 | 59 | 79 |
| 59 | 80 | 79 |
| 59 | 60 | 80 |
| 60 | 81 | 80 |
| 60 | 61 | 81 |

|    |    |    |
|----|----|----|
| 61 | 82 | 81 |
| 61 | 62 | 82 |
| 62 | 83 | 82 |
| 62 | 63 | 83 |
| 63 | 84 | 83 |
| 64 | 65 | 85 |
| 65 | 86 | 85 |
| 65 | 66 | 86 |
| 66 | 87 | 86 |
| 66 | 67 | 87 |
| 67 | 88 | 87 |
| 67 | 68 | 88 |
| 68 | 89 | 88 |
| 68 | 69 | 89 |
| 69 | 90 | 89 |
| 69 | 70 | 90 |
| 70 | 91 | 90 |
| 70 | 71 | 91 |
| 71 | 92 | 91 |
| 71 | 72 | 92 |
| 72 | 93 | 92 |
| 72 | 73 | 93 |
| 73 | 94 | 93 |
| 73 | 74 | 94 |
| 74 | 95 | 94 |
| 74 | 75 | 95 |

|    |     |     |
|----|-----|-----|
| 75 | 96  | 95  |
| 75 | 76  | 96  |
| 76 | 97  | 96  |
| 76 | 77  | 97  |
| 77 | 98  | 97  |
| 77 | 78  | 98  |
| 78 | 99  | 98  |
| 78 | 79  | 99  |
| 79 | 100 | 99  |
| 79 | 80  | 100 |
| 80 | 101 | 100 |
| 80 | 81  | 101 |
| 81 | 102 | 101 |
| 81 | 82  | 102 |
| 82 | 103 | 102 |
| 82 | 83  | 103 |
| 83 | 104 | 103 |
| 83 | 84  | 104 |
| 84 | 105 | 104 |
| 85 | 86  | 106 |
| 86 | 107 | 106 |
| 86 | 87  | 107 |
| 87 | 108 | 107 |
| 87 | 88  | 108 |
| 88 | 109 | 108 |
| 88 | 89  | 109 |

|     |     |     |
|-----|-----|-----|
| 89  | 110 | 109 |
| 89  | 90  | 110 |
| 90  | 111 | 110 |
| 90  | 91  | 111 |
| 91  | 112 | 111 |
| 91  | 92  | 112 |
| 92  | 113 | 112 |
| 92  | 93  | 113 |
| 93  | 114 | 113 |
| 93  | 94  | 114 |
| 94  | 115 | 114 |
| 94  | 95  | 115 |
| 95  | 116 | 115 |
| 95  | 96  | 116 |
| 96  | 117 | 116 |
| 96  | 97  | 117 |
| 97  | 118 | 117 |
| 97  | 98  | 118 |
| 98  | 119 | 118 |
| 98  | 99  | 119 |
| 99  | 120 | 119 |
| 99  | 100 | 120 |
| 100 | 121 | 120 |
| 100 | 101 | 121 |
| 101 | 122 | 121 |
| 101 | 102 | 122 |

|     |     |     |
|-----|-----|-----|
| 102 | 123 | 122 |
| 102 | 103 | 123 |
| 103 | 124 | 123 |
| 103 | 104 | 124 |
| 104 | 125 | 124 |
| 104 | 105 | 125 |
| 105 | 126 | 125 |
| 106 | 107 | 127 |
| 107 | 128 | 127 |
| 107 | 108 | 128 |
| 108 | 129 | 128 |
| 108 | 109 | 129 |
| 109 | 130 | 129 |
| 109 | 110 | 130 |
| 110 | 131 | 130 |
| 110 | 111 | 131 |
| 111 | 132 | 131 |
| 111 | 112 | 132 |
| 112 | 133 | 132 |
| 112 | 113 | 133 |
| 113 | 134 | 133 |
| 113 | 114 | 134 |
| 114 | 135 | 134 |
| 114 | 115 | 135 |
| 115 | 136 | 135 |
| 115 | 116 | 136 |

|     |     |     |
|-----|-----|-----|
| 116 | 137 | 136 |
| 116 | 117 | 137 |
| 117 | 138 | 137 |
| 117 | 118 | 138 |
| 118 | 139 | 138 |
| 118 | 119 | 139 |
| 119 | 140 | 139 |
| 119 | 120 | 140 |
| 120 | 141 | 140 |
| 120 | 121 | 141 |
| 121 | 142 | 141 |
| 121 | 122 | 142 |
| 122 | 143 | 142 |
| 122 | 123 | 143 |
| 123 | 144 | 143 |
| 123 | 124 | 144 |
| 124 | 145 | 144 |
| 124 | 125 | 145 |
| 125 | 146 | 145 |
| 125 | 126 | 146 |
| 126 | 147 | 146 |
| 127 | 128 | 148 |
| 128 | 149 | 148 |
| 128 | 129 | 149 |
| 129 | 150 | 149 |
| 129 | 130 | 150 |



|     |     |     |
|-----|-----|-----|
| 130 | 151 | 150 |
| 130 | 131 | 151 |
| 131 | 152 | 151 |
| 131 | 132 | 152 |
| 132 | 153 | 152 |
| 132 | 133 | 153 |
| 133 | 154 | 153 |
| 133 | 134 | 154 |
| 134 | 155 | 154 |
| 134 | 135 | 155 |
| 135 | 156 | 155 |
| 135 | 136 | 156 |
| 136 | 157 | 156 |
| 136 | 137 | 157 |
| 137 | 158 | 157 |
| 137 | 138 | 158 |
| 138 | 159 | 158 |
| 138 | 139 | 159 |
| 139 | 160 | 159 |
| 139 | 140 | 160 |
| 140 | 161 | 160 |
| 140 | 141 | 161 |
| 141 | 162 | 161 |
| 141 | 142 | 162 |
| 142 | 163 | 162 |
| 142 | 143 | 163 |

|     |     |     |
|-----|-----|-----|
| 143 | 164 | 163 |
| 143 | 144 | 164 |
| 144 | 165 | 164 |
| 144 | 145 | 165 |
| 145 | 166 | 165 |
| 145 | 146 | 166 |
| 146 | 167 | 166 |
| 146 | 147 | 167 |
| 147 | 168 | 167 |
| 148 | 149 | 169 |
| 149 | 170 | 169 |
| 149 | 150 | 170 |
| 150 | 171 | 170 |
| 150 | 151 | 171 |
| 151 | 172 | 171 |
| 151 | 152 | 172 |
| 152 | 173 | 172 |
| 152 | 153 | 173 |
| 153 | 174 | 173 |
| 153 | 154 | 174 |
| 154 | 175 | 174 |
| 154 | 155 | 175 |
| 155 | 176 | 175 |
| 155 | 156 | 176 |
| 156 | 177 | 176 |
| 156 | 157 | 177 |

|     |     |     |
|-----|-----|-----|
| 157 | 178 | 177 |
| 157 | 158 | 178 |
| 158 | 179 | 178 |
| 158 | 159 | 179 |
| 159 | 180 | 179 |
| 159 | 160 | 180 |
| 160 | 181 | 180 |
| 160 | 161 | 181 |
| 161 | 182 | 181 |
| 161 | 162 | 182 |
| 162 | 183 | 182 |
| 162 | 163 | 183 |
| 163 | 184 | 183 |
| 163 | 164 | 184 |
| 164 | 185 | 184 |
| 164 | 165 | 185 |
| 165 | 186 | 185 |
| 165 | 166 | 186 |
| 166 | 187 | 186 |
| 166 | 167 | 187 |
| 167 | 188 | 187 |
| 167 | 168 | 188 |
| 168 | 189 | 188 |
| 169 | 170 | 190 |
| 170 | 191 | 190 |
| 170 | 171 | 191 |

|     |     |     |
|-----|-----|-----|
| 171 | 192 | 191 |
| 171 | 172 | 192 |
| 172 | 193 | 192 |
| 172 | 173 | 193 |
| 173 | 194 | 193 |
| 173 | 174 | 194 |
| 174 | 195 | 194 |
| 174 | 175 | 195 |
| 175 | 196 | 195 |
| 175 | 176 | 196 |
| 176 | 197 | 196 |
| 176 | 177 | 197 |
| 177 | 198 | 197 |
| 177 | 178 | 198 |
| 178 | 199 | 198 |
| 178 | 179 | 199 |
| 179 | 200 | 199 |
| 179 | 180 | 200 |
| 180 | 201 | 200 |
| 180 | 181 | 201 |
| 181 | 202 | 201 |
| 181 | 182 | 202 |
| 182 | 203 | 202 |
| 182 | 183 | 203 |
| 183 | 204 | 203 |
| 183 | 184 | 204 |

|     |     |     |
|-----|-----|-----|
| 184 | 205 | 204 |
| 184 | 185 | 205 |
| 185 | 206 | 205 |
| 185 | 186 | 206 |
| 186 | 207 | 206 |
| 186 | 187 | 207 |
| 187 | 208 | 207 |
| 187 | 188 | 208 |
| 188 | 209 | 208 |
| 188 | 189 | 209 |
| 189 | 210 | 209 |
| 190 | 191 | 211 |
| 191 | 212 | 211 |
| 191 | 192 | 212 |
| 192 | 213 | 212 |
| 192 | 193 | 213 |
| 193 | 214 | 213 |
| 193 | 194 | 214 |
| 194 | 215 | 214 |
| 194 | 195 | 215 |
| 195 | 216 | 215 |
| 195 | 196 | 216 |
| 196 | 217 | 216 |
| 196 | 197 | 217 |
| 197 | 218 | 217 |
| 197 | 198 | 218 |

|     |     |     |
|-----|-----|-----|
| 198 | 219 | 218 |
| 198 | 199 | 219 |
| 199 | 220 | 219 |
| 199 | 200 | 220 |
| 200 | 221 | 220 |
| 200 | 201 | 221 |
| 201 | 222 | 221 |
| 201 | 202 | 222 |
| 202 | 223 | 222 |
| 202 | 203 | 223 |
| 203 | 224 | 223 |
| 203 | 204 | 224 |
| 204 | 225 | 224 |
| 204 | 205 | 225 |
| 205 | 226 | 225 |
| 205 | 206 | 226 |
| 206 | 227 | 226 |
| 206 | 207 | 227 |
| 207 | 228 | 227 |
| 207 | 208 | 228 |
| 208 | 229 | 228 |
| 208 | 209 | 229 |
| 209 | 230 | 229 |
| 209 | 210 | 230 |
| 210 | 231 | 230 |
| 211 | 212 | 232 |

|     |     |     |
|-----|-----|-----|
| 212 | 233 | 232 |
| 212 | 213 | 233 |
| 213 | 234 | 233 |
| 213 | 214 | 234 |
| 214 | 235 | 234 |
| 214 | 215 | 235 |
| 215 | 236 | 235 |
| 215 | 216 | 236 |
| 216 | 237 | 236 |
| 216 | 217 | 237 |
| 217 | 238 | 237 |
| 217 | 218 | 238 |
| 218 | 239 | 238 |
| 218 | 219 | 239 |
| 219 | 240 | 239 |
| 219 | 220 | 240 |
| 220 | 241 | 240 |
| 220 | 221 | 241 |
| 221 | 242 | 241 |
| 221 | 222 | 242 |
| 222 | 243 | 242 |
| 222 | 223 | 243 |
| 223 | 244 | 243 |
| 223 | 224 | 244 |
| 224 | 245 | 244 |
| 224 | 225 | 245 |

|     |     |     |
|-----|-----|-----|
| 225 | 246 | 245 |
| 225 | 226 | 246 |
| 226 | 247 | 246 |
| 226 | 227 | 247 |
| 227 | 248 | 247 |
| 227 | 228 | 248 |
| 228 | 249 | 248 |
| 228 | 229 | 249 |
| 229 | 250 | 249 |
| 229 | 230 | 250 |
| 230 | 251 | 250 |
| 230 | 231 | 251 |
| 231 | 252 | 251 |
| 232 | 233 | 253 |
| 233 | 254 | 253 |
| 233 | 234 | 254 |
| 234 | 255 | 254 |
| 234 | 235 | 255 |
| 235 | 256 | 255 |
| 235 | 236 | 256 |
| 236 | 257 | 256 |
| 236 | 237 | 257 |
| 237 | 258 | 257 |
| 237 | 238 | 258 |
| 238 | 259 | 258 |
| 238 | 239 | 259 |



|     |     |     |
|-----|-----|-----|
| 239 | 260 | 259 |
| 239 | 240 | 260 |
| 240 | 261 | 260 |
| 240 | 241 | 261 |
| 241 | 262 | 261 |
| 241 | 242 | 262 |
| 242 | 263 | 262 |
| 242 | 243 | 263 |
| 243 | 264 | 263 |
| 243 | 244 | 264 |
| 244 | 265 | 264 |
| 244 | 245 | 265 |
| 245 | 266 | 265 |
| 245 | 246 | 266 |
| 246 | 267 | 266 |
| 246 | 247 | 267 |
| 247 | 268 | 267 |
| 247 | 248 | 268 |
| 248 | 269 | 268 |
| 248 | 249 | 269 |
| 249 | 270 | 269 |
| 249 | 250 | 270 |
| 250 | 271 | 270 |
| 250 | 251 | 271 |
| 251 | 272 | 271 |
| 251 | 252 | 272 |

|     |     |     |
|-----|-----|-----|
| 252 | 273 | 272 |
| 253 | 254 | 274 |
| 254 | 275 | 274 |
| 254 | 255 | 275 |
| 255 | 276 | 275 |
| 255 | 256 | 276 |
| 256 | 277 | 276 |
| 256 | 257 | 277 |
| 257 | 278 | 277 |
| 257 | 258 | 278 |
| 258 | 279 | 278 |
| 258 | 259 | 279 |
| 259 | 280 | 279 |
| 259 | 260 | 280 |
| 260 | 281 | 280 |
| 260 | 261 | 281 |
| 261 | 282 | 281 |
| 261 | 262 | 282 |
| 262 | 283 | 282 |
| 262 | 263 | 283 |
| 263 | 284 | 283 |
| 263 | 264 | 284 |
| 264 | 285 | 284 |
| 264 | 265 | 285 |
| 265 | 286 | 285 |
| 265 | 266 | 286 |

|     |     |     |
|-----|-----|-----|
| 266 | 287 | 286 |
| 266 | 267 | 287 |
| 267 | 288 | 287 |
| 267 | 268 | 288 |
| 268 | 289 | 288 |
| 268 | 269 | 289 |
| 269 | 290 | 289 |
| 269 | 270 | 290 |
| 270 | 291 | 290 |
| 270 | 271 | 291 |
| 271 | 292 | 291 |
| 271 | 272 | 292 |
| 272 | 293 | 292 |
| 272 | 273 | 293 |
| 273 | 294 | 293 |
| 274 | 275 | 295 |
| 275 | 296 | 295 |
| 275 | 276 | 296 |
| 276 | 297 | 296 |
| 276 | 277 | 297 |
| 277 | 298 | 297 |
| 277 | 278 | 298 |
| 278 | 299 | 298 |
| 278 | 279 | 299 |
| 279 | 300 | 299 |
| 279 | 280 | 300 |

|     |     |     |
|-----|-----|-----|
| 280 | 301 | 300 |
| 280 | 281 | 301 |
| 281 | 302 | 301 |
| 281 | 282 | 302 |
| 282 | 303 | 302 |
| 282 | 283 | 303 |
| 283 | 304 | 303 |
| 283 | 284 | 304 |
| 284 | 305 | 304 |
| 284 | 285 | 305 |
| 285 | 306 | 305 |
| 285 | 286 | 306 |
| 286 | 307 | 306 |
| 286 | 287 | 307 |
| 287 | 308 | 307 |
| 287 | 288 | 308 |
| 288 | 309 | 308 |
| 288 | 289 | 309 |
| 289 | 310 | 309 |
| 289 | 290 | 310 |
| 290 | 311 | 310 |
| 290 | 291 | 311 |
| 291 | 312 | 311 |
| 291 | 292 | 312 |
| 292 | 313 | 312 |
| 292 | 293 | 313 |

|     |     |     |
|-----|-----|-----|
| 293 | 314 | 313 |
| 293 | 294 | 314 |
| 294 | 315 | 314 |
| 295 | 296 | 316 |
| 296 | 317 | 316 |
| 296 | 297 | 317 |
| 297 | 318 | 317 |
| 297 | 298 | 318 |
| 298 | 319 | 318 |
| 298 | 299 | 319 |
| 299 | 320 | 319 |
| 299 | 300 | 320 |
| 300 | 321 | 320 |
| 300 | 301 | 321 |
| 301 | 322 | 321 |
| 301 | 302 | 322 |
| 302 | 323 | 322 |
| 302 | 303 | 323 |
| 303 | 324 | 323 |
| 303 | 304 | 324 |
| 304 | 325 | 324 |
| 304 | 305 | 325 |
| 305 | 326 | 325 |
| 305 | 306 | 326 |
| 306 | 327 | 326 |
| 306 | 307 | 327 |

|     |     |     |
|-----|-----|-----|
| 307 | 328 | 327 |
| 307 | 308 | 328 |
| 308 | 329 | 328 |
| 308 | 309 | 329 |
| 309 | 330 | 329 |
| 309 | 310 | 330 |
| 310 | 331 | 330 |
| 310 | 311 | 331 |
| 311 | 332 | 331 |
| 311 | 312 | 332 |
| 312 | 333 | 332 |
| 312 | 313 | 333 |
| 313 | 334 | 333 |
| 313 | 314 | 334 |
| 314 | 335 | 334 |
| 314 | 315 | 335 |
| 315 | 336 | 335 |
| 316 | 317 | 337 |
| 317 | 338 | 337 |
| 317 | 318 | 338 |
| 318 | 339 | 338 |
| 318 | 319 | 339 |
| 319 | 340 | 339 |
| 319 | 320 | 340 |
| 320 | 341 | 340 |
| 320 | 321 | 341 |

|     |     |     |
|-----|-----|-----|
| 321 | 342 | 341 |
| 321 | 322 | 342 |
| 322 | 343 | 342 |
| 322 | 323 | 343 |
| 323 | 344 | 343 |
| 323 | 324 | 344 |
| 324 | 345 | 344 |
| 324 | 325 | 345 |
| 325 | 346 | 345 |
| 325 | 326 | 346 |
| 326 | 347 | 346 |
| 326 | 327 | 347 |
| 327 | 348 | 347 |
| 327 | 328 | 348 |
| 328 | 349 | 348 |
| 328 | 329 | 349 |
| 329 | 350 | 349 |
| 329 | 330 | 350 |
| 330 | 351 | 350 |
| 330 | 331 | 351 |
| 331 | 352 | 351 |
| 331 | 332 | 352 |
| 332 | 353 | 352 |
| 332 | 333 | 353 |
| 333 | 354 | 353 |
| 333 | 334 | 354 |

|     |     |     |
|-----|-----|-----|
| 334 | 355 | 354 |
| 334 | 335 | 355 |
| 335 | 356 | 355 |
| 335 | 336 | 356 |
| 336 | 357 | 356 |
| 337 | 338 | 358 |
| 338 | 359 | 358 |
| 338 | 339 | 359 |
| 339 | 360 | 359 |
| 339 | 340 | 360 |
| 340 | 361 | 360 |
| 340 | 341 | 361 |
| 341 | 362 | 361 |
| 341 | 342 | 362 |
| 342 | 363 | 362 |
| 342 | 343 | 363 |
| 343 | 364 | 363 |
| 343 | 344 | 364 |
| 344 | 365 | 364 |
| 344 | 345 | 365 |
| 345 | 366 | 365 |
| 345 | 346 | 366 |
| 346 | 367 | 366 |
| 346 | 347 | 367 |
| 347 | 368 | 367 |
| 347 | 348 | 368 |



|     |     |     |
|-----|-----|-----|
| 348 | 369 | 368 |
| 348 | 349 | 369 |
| 349 | 370 | 369 |
| 349 | 350 | 370 |
| 350 | 371 | 370 |
| 350 | 351 | 371 |
| 351 | 372 | 371 |
| 351 | 352 | 372 |
| 352 | 373 | 372 |
| 352 | 353 | 373 |
| 353 | 374 | 373 |
| 353 | 354 | 374 |
| 354 | 375 | 374 |
| 354 | 355 | 375 |
| 355 | 376 | 375 |
| 355 | 356 | 376 |
| 356 | 377 | 376 |
| 356 | 357 | 377 |
| 357 | 378 | 377 |
| 358 | 359 | 379 |
| 359 | 380 | 379 |
| 359 | 360 | 380 |
| 360 | 381 | 380 |
| 360 | 361 | 381 |
| 361 | 382 | 381 |
| 361 | 362 | 382 |

|     |     |     |
|-----|-----|-----|
| 362 | 383 | 382 |
| 362 | 363 | 383 |
| 363 | 384 | 383 |
| 363 | 364 | 384 |
| 364 | 385 | 384 |
| 364 | 365 | 385 |
| 365 | 386 | 385 |
| 365 | 366 | 386 |
| 366 | 387 | 386 |
| 366 | 367 | 387 |
| 367 | 388 | 387 |
| 367 | 368 | 388 |
| 368 | 389 | 388 |
| 368 | 369 | 389 |
| 369 | 390 | 389 |
| 369 | 370 | 390 |
| 370 | 391 | 390 |
| 370 | 371 | 391 |
| 371 | 392 | 391 |
| 371 | 372 | 392 |
| 372 | 393 | 392 |
| 372 | 373 | 393 |
| 373 | 394 | 393 |
| 373 | 374 | 394 |
| 374 | 395 | 394 |
| 374 | 375 | 395 |

|     |     |     |
|-----|-----|-----|
| 375 | 396 | 395 |
| 375 | 376 | 396 |
| 376 | 397 | 396 |
| 376 | 377 | 397 |
| 377 | 398 | 397 |
| 377 | 378 | 398 |
| 378 | 399 | 398 |
| 379 | 380 | 400 |
| 380 | 401 | 400 |
| 380 | 381 | 401 |
| 381 | 402 | 401 |
| 381 | 382 | 402 |
| 382 | 403 | 402 |
| 382 | 383 | 403 |
| 383 | 404 | 403 |
| 383 | 384 | 404 |
| 384 | 405 | 404 |
| 384 | 385 | 405 |
| 385 | 406 | 405 |
| 385 | 386 | 406 |
| 386 | 407 | 406 |
| 386 | 387 | 407 |
| 387 | 408 | 407 |
| 387 | 388 | 408 |
| 388 | 409 | 408 |
| 388 | 389 | 409 |

|     |     |     |
|-----|-----|-----|
| 389 | 410 | 409 |
| 389 | 390 | 410 |
| 390 | 411 | 410 |
| 390 | 391 | 411 |
| 391 | 412 | 411 |
| 391 | 392 | 412 |
| 392 | 413 | 412 |
| 392 | 393 | 413 |
| 393 | 414 | 413 |
| 393 | 394 | 414 |
| 394 | 415 | 414 |
| 394 | 395 | 415 |
| 395 | 416 | 415 |
| 395 | 396 | 416 |
| 396 | 417 | 416 |
| 396 | 397 | 417 |
| 397 | 418 | 417 |
| 397 | 398 | 418 |
| 398 | 419 | 418 |
| 398 | 399 | 419 |
| 399 | 420 | 419 |
| 400 | 401 | 421 |
| 401 | 422 | 421 |
| 401 | 402 | 422 |
| 402 | 423 | 422 |
| 402 | 403 | 423 |

|     |     |     |
|-----|-----|-----|
| 403 | 424 | 423 |
| 403 | 404 | 424 |
| 404 | 425 | 424 |
| 404 | 405 | 425 |
| 405 | 426 | 425 |
| 405 | 406 | 426 |
| 406 | 427 | 426 |
| 406 | 407 | 427 |
| 407 | 428 | 427 |
| 407 | 408 | 428 |
| 408 | 429 | 428 |
| 408 | 409 | 429 |
| 409 | 430 | 429 |
| 409 | 410 | 430 |
| 410 | 431 | 430 |
| 410 | 411 | 431 |
| 411 | 432 | 431 |
| 411 | 412 | 432 |
| 412 | 433 | 432 |
| 412 | 413 | 433 |
| 413 | 434 | 433 |
| 413 | 414 | 434 |
| 414 | 435 | 434 |
| 414 | 415 | 435 |
| 415 | 436 | 435 |
| 415 | 416 | 436 |

|     |     |     |
|-----|-----|-----|
| 416 | 437 | 436 |
| 416 | 417 | 437 |
| 417 | 438 | 437 |
| 417 | 418 | 438 |
| 418 | 439 | 438 |
| 418 | 419 | 439 |
| 419 | 440 | 439 |
| 419 | 420 | 440 |
| 420 | 441 | 440 |
| 421 | 422 | 442 |
| 422 | 443 | 442 |
| 422 | 423 | 443 |
| 423 | 444 | 443 |
| 423 | 424 | 444 |
| 424 | 445 | 444 |
| 424 | 425 | 445 |
| 425 | 446 | 445 |
| 425 | 426 | 446 |
| 426 | 447 | 446 |
| 426 | 427 | 447 |
| 427 | 448 | 447 |
| 427 | 428 | 448 |
| 428 | 449 | 448 |
| 428 | 429 | 449 |
| 429 | 450 | 449 |
| 429 | 430 | 450 |

|     |     |     |
|-----|-----|-----|
| 430 | 451 | 450 |
| 430 | 431 | 451 |
| 431 | 452 | 451 |
| 431 | 432 | 452 |
| 432 | 453 | 452 |
| 432 | 433 | 453 |
| 433 | 454 | 453 |
| 433 | 434 | 454 |
| 434 | 455 | 454 |
| 434 | 435 | 455 |
| 435 | 456 | 455 |
| 435 | 436 | 456 |
| 436 | 457 | 456 |
| 436 | 437 | 457 |
| 437 | 458 | 457 |
| 437 | 438 | 458 |
| 438 | 459 | 458 |
| 438 | 439 | 459 |
| 439 | 460 | 459 |
| 439 | 440 | 460 |
| 440 | 461 | 460 |
| 440 | 441 | 461 |
| 441 | 462 | 461 |
| 442 | 443 | 463 |
| 443 | 464 | 463 |
| 443 | 444 | 464 |

|     |     |     |
|-----|-----|-----|
| 444 | 465 | 464 |
| 444 | 445 | 465 |
| 445 | 466 | 465 |
| 445 | 446 | 466 |
| 446 | 467 | 466 |
| 446 | 447 | 467 |
| 447 | 468 | 467 |
| 447 | 448 | 468 |
| 448 | 469 | 468 |
| 448 | 449 | 469 |
| 449 | 470 | 469 |
| 449 | 450 | 470 |
| 450 | 471 | 470 |
| 450 | 451 | 471 |
| 451 | 472 | 471 |
| 451 | 452 | 472 |
| 452 | 473 | 472 |
| 452 | 453 | 473 |
| 453 | 474 | 473 |
| 453 | 454 | 474 |
| 454 | 475 | 474 |
| 454 | 455 | 475 |
| 455 | 476 | 475 |
| 455 | 456 | 476 |
| 456 | 477 | 476 |
| 456 | 457 | 477 |



|     |     |     |
|-----|-----|-----|
| 457 | 478 | 477 |
| 457 | 458 | 478 |
| 458 | 479 | 478 |
| 458 | 459 | 479 |
| 459 | 480 | 479 |
| 459 | 460 | 480 |
| 460 | 481 | 480 |
| 460 | 461 | 481 |
| 461 | 482 | 481 |
| 461 | 462 | 482 |
| 462 | 483 | 482 |
| 463 | 464 | 484 |
| 464 | 485 | 484 |
| 464 | 465 | 485 |
| 465 | 486 | 485 |
| 465 | 466 | 486 |
| 466 | 487 | 486 |
| 466 | 467 | 487 |
| 467 | 488 | 487 |
| 467 | 468 | 488 |
| 468 | 489 | 488 |
| 468 | 469 | 489 |
| 469 | 490 | 489 |
| 469 | 470 | 490 |
| 470 | 491 | 490 |
| 470 | 471 | 491 |

|     |     |     |
|-----|-----|-----|
| 471 | 492 | 491 |
| 471 | 472 | 492 |
| 472 | 493 | 492 |
| 472 | 473 | 493 |
| 473 | 494 | 493 |
| 473 | 474 | 494 |
| 474 | 495 | 494 |
| 474 | 475 | 495 |
| 475 | 496 | 495 |
| 475 | 476 | 496 |
| 476 | 497 | 496 |
| 476 | 477 | 497 |
| 477 | 498 | 497 |
| 477 | 478 | 498 |
| 478 | 499 | 498 |
| 478 | 479 | 499 |
| 479 | 500 | 499 |
| 479 | 480 | 500 |
| 480 | 501 | 500 |
| 480 | 481 | 501 |
| 481 | 502 | 501 |
| 481 | 482 | 502 |
| 482 | 503 | 502 |
| 482 | 483 | 503 |
| 483 | 504 | 503 |
| 484 | 485 | 505 |

|     |     |     |
|-----|-----|-----|
| 485 | 506 | 505 |
| 485 | 486 | 506 |
| 486 | 507 | 506 |
| 486 | 487 | 507 |
| 487 | 508 | 507 |
| 487 | 488 | 508 |
| 488 | 509 | 508 |
| 488 | 489 | 509 |
| 489 | 510 | 509 |
| 489 | 490 | 510 |
| 490 | 511 | 510 |
| 490 | 491 | 511 |
| 491 | 512 | 511 |
| 491 | 492 | 512 |
| 492 | 513 | 512 |
| 492 | 493 | 513 |
| 493 | 514 | 513 |
| 493 | 494 | 514 |
| 494 | 515 | 514 |
| 494 | 495 | 515 |
| 495 | 516 | 515 |
| 495 | 496 | 516 |
| 496 | 517 | 516 |
| 496 | 497 | 517 |
| 497 | 518 | 517 |
| 497 | 498 | 518 |

|     |     |     |
|-----|-----|-----|
| 498 | 519 | 518 |
| 498 | 499 | 519 |
| 499 | 520 | 519 |
| 499 | 500 | 520 |
| 500 | 521 | 520 |
| 500 | 501 | 521 |
| 501 | 522 | 521 |
| 501 | 502 | 522 |
| 502 | 523 | 522 |
| 502 | 503 | 523 |
| 503 | 524 | 523 |
| 503 | 504 | 524 |
| 504 | 525 | 524 |
| 505 | 506 | 526 |
| 506 | 527 | 526 |
| 506 | 507 | 527 |
| 507 | 528 | 527 |
| 507 | 508 | 528 |
| 508 | 529 | 528 |
| 508 | 509 | 529 |
| 509 | 530 | 529 |
| 509 | 510 | 530 |
| 510 | 531 | 530 |
| 510 | 511 | 531 |
| 511 | 532 | 531 |
| 511 | 512 | 532 |

|     |     |     |
|-----|-----|-----|
| 512 | 533 | 532 |
| 512 | 513 | 533 |
| 513 | 534 | 533 |
| 513 | 514 | 534 |
| 514 | 535 | 534 |
| 514 | 515 | 535 |
| 515 | 536 | 535 |
| 515 | 516 | 536 |
| 516 | 537 | 536 |
| 516 | 517 | 537 |
| 517 | 538 | 537 |
| 517 | 518 | 538 |
| 518 | 539 | 538 |
| 518 | 519 | 539 |
| 519 | 540 | 539 |
| 519 | 520 | 540 |
| 520 | 541 | 540 |
| 520 | 521 | 541 |
| 521 | 542 | 541 |
| 521 | 522 | 542 |
| 522 | 543 | 542 |
| 522 | 523 | 543 |
| 523 | 544 | 543 |
| 523 | 524 | 544 |
| 524 | 545 | 544 |
| 524 | 525 | 545 |

|     |     |     |
|-----|-----|-----|
| 525 | 546 | 545 |
| 526 | 527 | 547 |
| 527 | 548 | 547 |
| 527 | 528 | 548 |
| 528 | 549 | 548 |
| 528 | 529 | 549 |
| 529 | 550 | 549 |
| 529 | 530 | 550 |
| 530 | 551 | 550 |
| 530 | 531 | 551 |
| 531 | 552 | 551 |
| 531 | 532 | 552 |
| 532 | 553 | 552 |
| 532 | 533 | 553 |
| 533 | 554 | 553 |
| 533 | 534 | 554 |
| 534 | 555 | 554 |
| 534 | 535 | 555 |
| 535 | 556 | 555 |
| 535 | 536 | 556 |
| 536 | 557 | 556 |
| 536 | 537 | 557 |
| 537 | 558 | 557 |
| 537 | 538 | 558 |
| 538 | 559 | 558 |
| 538 | 539 | 559 |

|     |     |     |
|-----|-----|-----|
| 539 | 560 | 559 |
| 539 | 540 | 560 |
| 540 | 561 | 560 |
| 540 | 541 | 561 |
| 541 | 562 | 561 |
| 541 | 542 | 562 |
| 542 | 563 | 562 |
| 542 | 543 | 563 |
| 543 | 564 | 563 |
| 543 | 544 | 564 |
| 544 | 565 | 564 |
| 544 | 545 | 565 |
| 545 | 566 | 565 |
| 545 | 546 | 566 |
| 546 | 567 | 566 |
| 547 | 548 | 568 |
| 548 | 569 | 568 |
| 548 | 549 | 569 |
| 549 | 570 | 569 |
| 549 | 550 | 570 |
| 550 | 571 | 570 |
| 550 | 551 | 571 |
| 551 | 572 | 571 |
| 551 | 552 | 572 |
| 552 | 573 | 572 |
| 552 | 553 | 573 |

|     |     |     |
|-----|-----|-----|
| 553 | 574 | 573 |
| 553 | 554 | 574 |
| 554 | 575 | 574 |
| 554 | 555 | 575 |
| 555 | 576 | 575 |
| 555 | 556 | 576 |
| 556 | 577 | 576 |
| 556 | 557 | 577 |
| 557 | 578 | 577 |
| 557 | 558 | 578 |
| 558 | 579 | 578 |
| 558 | 559 | 579 |
| 559 | 580 | 579 |
| 559 | 560 | 580 |
| 560 | 581 | 580 |
| 560 | 561 | 581 |
| 561 | 582 | 581 |
| 561 | 562 | 582 |
| 562 | 583 | 582 |
| 562 | 563 | 583 |
| 563 | 584 | 583 |
| 563 | 564 | 584 |
| 564 | 585 | 584 |
| 564 | 565 | 585 |
| 565 | 586 | 585 |
| 565 | 566 | 586 |



|     |     |     |
|-----|-----|-----|
| 566 | 587 | 586 |
| 566 | 567 | 587 |
| 567 | 588 | 587 |
| 568 | 569 | 589 |
| 569 | 590 | 589 |
| 569 | 570 | 590 |
| 570 | 591 | 590 |
| 570 | 571 | 591 |
| 571 | 592 | 591 |
| 571 | 572 | 592 |
| 572 | 593 | 592 |
| 572 | 573 | 593 |
| 573 | 594 | 593 |
| 573 | 574 | 594 |
| 574 | 595 | 594 |
| 574 | 575 | 595 |
| 575 | 596 | 595 |
| 575 | 576 | 596 |
| 576 | 597 | 596 |
| 576 | 577 | 597 |
| 577 | 598 | 597 |
| 577 | 578 | 598 |
| 578 | 599 | 598 |
| 578 | 579 | 599 |
| 579 | 600 | 599 |
| 579 | 580 | 600 |

|     |     |     |
|-----|-----|-----|
| 580 | 601 | 600 |
| 580 | 581 | 601 |
| 581 | 602 | 601 |
| 581 | 582 | 602 |
| 582 | 603 | 602 |
| 582 | 583 | 603 |
| 583 | 604 | 603 |
| 583 | 584 | 604 |
| 584 | 605 | 604 |
| 584 | 585 | 605 |
| 585 | 606 | 605 |
| 585 | 586 | 606 |
| 586 | 607 | 606 |
| 586 | 587 | 607 |
| 587 | 608 | 607 |
| 587 | 588 | 608 |
| 588 | 609 | 608 |
| 589 | 590 | 610 |
| 590 | 611 | 610 |
| 590 | 591 | 611 |
| 591 | 612 | 611 |
| 591 | 592 | 612 |
| 592 | 613 | 612 |
| 592 | 593 | 613 |
| 593 | 614 | 613 |
| 593 | 594 | 614 |

|     |     |     |
|-----|-----|-----|
| 594 | 615 | 614 |
| 594 | 595 | 615 |
| 595 | 616 | 615 |
| 595 | 596 | 616 |
| 596 | 617 | 616 |
| 596 | 597 | 617 |
| 597 | 618 | 617 |
| 597 | 598 | 618 |
| 598 | 619 | 618 |
| 598 | 599 | 619 |
| 599 | 620 | 619 |
| 599 | 600 | 620 |
| 600 | 621 | 620 |
| 600 | 601 | 621 |
| 601 | 622 | 621 |
| 601 | 602 | 622 |
| 602 | 623 | 622 |
| 602 | 603 | 623 |
| 603 | 624 | 623 |
| 603 | 604 | 624 |
| 604 | 625 | 624 |
| 604 | 605 | 625 |
| 605 | 626 | 625 |
| 605 | 606 | 626 |
| 606 | 627 | 626 |
| 606 | 607 | 627 |

|     |     |     |
|-----|-----|-----|
| 607 | 628 | 627 |
| 607 | 608 | 628 |
| 608 | 629 | 628 |
| 608 | 609 | 629 |
| 609 | 630 | 629 |
| 610 | 611 | 631 |
| 611 | 632 | 631 |
| 611 | 612 | 632 |
| 612 | 633 | 632 |
| 612 | 613 | 633 |
| 613 | 634 | 633 |
| 613 | 614 | 634 |
| 614 | 635 | 634 |
| 614 | 615 | 635 |
| 615 | 636 | 635 |
| 615 | 616 | 636 |
| 616 | 637 | 636 |
| 616 | 617 | 637 |
| 617 | 638 | 637 |
| 617 | 618 | 638 |
| 618 | 639 | 638 |
| 618 | 619 | 639 |
| 619 | 640 | 639 |
| 619 | 620 | 640 |
| 620 | 641 | 640 |
| 620 | 621 | 641 |

|     |     |     |
|-----|-----|-----|
| 621 | 642 | 641 |
| 621 | 622 | 642 |
| 622 | 643 | 642 |
| 622 | 623 | 643 |
| 623 | 644 | 643 |
| 623 | 624 | 644 |
| 624 | 645 | 644 |
| 624 | 625 | 645 |
| 625 | 646 | 645 |
| 625 | 626 | 646 |
| 626 | 647 | 646 |
| 626 | 627 | 647 |
| 627 | 648 | 647 |
| 627 | 628 | 648 |
| 628 | 649 | 648 |
| 628 | 629 | 649 |
| 629 | 650 | 649 |
| 629 | 630 | 650 |
| 630 | 651 | 650 |
| 631 | 632 | 652 |
| 632 | 653 | 652 |
| 632 | 633 | 653 |
| 633 | 654 | 653 |
| 633 | 634 | 654 |
| 634 | 655 | 654 |
| 634 | 635 | 655 |

|     |     |     |
|-----|-----|-----|
| 635 | 656 | 655 |
| 635 | 636 | 656 |
| 636 | 657 | 656 |
| 636 | 637 | 657 |
| 637 | 658 | 657 |
| 637 | 638 | 658 |
| 638 | 659 | 658 |
| 638 | 639 | 659 |
| 639 | 660 | 659 |
| 639 | 640 | 660 |
| 640 | 661 | 660 |
| 640 | 641 | 661 |
| 641 | 662 | 661 |
| 641 | 642 | 662 |
| 642 | 663 | 662 |
| 642 | 643 | 663 |
| 643 | 664 | 663 |
| 643 | 644 | 664 |
| 644 | 665 | 664 |
| 644 | 645 | 665 |
| 645 | 666 | 665 |
| 645 | 646 | 666 |
| 646 | 667 | 666 |
| 646 | 647 | 667 |
| 647 | 668 | 667 |
| 647 | 648 | 668 |

|     |     |     |
|-----|-----|-----|
| 648 | 669 | 668 |
| 648 | 649 | 669 |
| 649 | 670 | 669 |
| 649 | 650 | 670 |
| 650 | 671 | 670 |
| 650 | 651 | 671 |
| 651 | 672 | 671 |
| 652 | 653 | 673 |
| 653 | 674 | 673 |
| 653 | 654 | 674 |
| 654 | 675 | 674 |
| 654 | 655 | 675 |
| 655 | 676 | 675 |
| 655 | 656 | 676 |
| 656 | 677 | 676 |
| 656 | 657 | 677 |
| 657 | 678 | 677 |
| 657 | 658 | 678 |
| 658 | 679 | 678 |
| 658 | 659 | 679 |
| 659 | 680 | 679 |
| 659 | 660 | 680 |
| 660 | 681 | 680 |
| 660 | 661 | 681 |
| 661 | 682 | 681 |
| 661 | 662 | 682 |

|     |     |     |
|-----|-----|-----|
| 662 | 683 | 682 |
| 662 | 663 | 683 |
| 663 | 684 | 683 |
| 663 | 664 | 684 |
| 664 | 685 | 684 |
| 664 | 665 | 685 |
| 665 | 686 | 685 |
| 665 | 666 | 686 |
| 666 | 687 | 686 |
| 666 | 667 | 687 |
| 667 | 688 | 687 |
| 667 | 668 | 688 |
| 668 | 689 | 688 |
| 668 | 669 | 689 |
| 669 | 690 | 689 |
| 669 | 670 | 690 |
| 670 | 691 | 690 |
| 670 | 671 | 691 |
| 671 | 692 | 691 |
| 671 | 672 | 692 |
| 672 | 693 | 692 |
| 673 | 674 | 694 |
| 674 | 695 | 694 |
| 674 | 675 | 695 |
| 675 | 696 | 695 |
| 675 | 676 | 696 |



|     |     |     |
|-----|-----|-----|
| 676 | 697 | 696 |
| 676 | 677 | 697 |
| 677 | 698 | 697 |
| 677 | 678 | 698 |
| 678 | 699 | 698 |
| 678 | 679 | 699 |
| 679 | 700 | 699 |
| 679 | 680 | 700 |
| 680 | 701 | 700 |
| 680 | 681 | 701 |
| 681 | 702 | 701 |
| 681 | 682 | 702 |
| 682 | 703 | 702 |
| 682 | 683 | 703 |
| 683 | 704 | 703 |
| 683 | 684 | 704 |
| 684 | 705 | 704 |
| 684 | 685 | 705 |
| 685 | 706 | 705 |
| 685 | 686 | 706 |
| 686 | 707 | 706 |
| 686 | 687 | 707 |
| 687 | 708 | 707 |
| 687 | 688 | 708 |
| 688 | 709 | 708 |
| 688 | 689 | 709 |

|     |     |     |
|-----|-----|-----|
| 689 | 710 | 709 |
| 689 | 690 | 710 |
| 690 | 711 | 710 |
| 690 | 691 | 711 |
| 691 | 712 | 711 |
| 691 | 692 | 712 |
| 692 | 713 | 712 |
| 692 | 693 | 713 |
| 693 | 714 | 713 |
| 694 | 695 | 715 |
| 695 | 716 | 715 |
| 695 | 696 | 716 |
| 696 | 717 | 716 |
| 696 | 697 | 717 |
| 697 | 718 | 717 |
| 697 | 698 | 718 |
| 698 | 719 | 718 |
| 698 | 699 | 719 |
| 699 | 720 | 719 |
| 699 | 700 | 720 |
| 700 | 721 | 720 |
| 700 | 701 | 721 |
| 701 | 722 | 721 |
| 701 | 702 | 722 |
| 702 | 723 | 722 |
| 702 | 703 | 723 |

|     |     |     |
|-----|-----|-----|
| 703 | 724 | 723 |
| 703 | 704 | 724 |
| 704 | 725 | 724 |
| 704 | 705 | 725 |
| 705 | 726 | 725 |
| 705 | 706 | 726 |
| 706 | 727 | 726 |
| 706 | 707 | 727 |
| 707 | 728 | 727 |
| 707 | 708 | 728 |
| 708 | 729 | 728 |
| 708 | 709 | 729 |
| 709 | 730 | 729 |
| 709 | 710 | 730 |
| 710 | 731 | 730 |
| 710 | 711 | 731 |
| 711 | 732 | 731 |
| 711 | 712 | 732 |
| 712 | 733 | 732 |
| 712 | 713 | 733 |
| 713 | 734 | 733 |
| 713 | 714 | 734 |
| 714 | 735 | 734 |
| 715 | 716 | 736 |
| 716 | 737 | 736 |
| 716 | 717 | 737 |

|     |     |     |
|-----|-----|-----|
| 717 | 738 | 737 |
| 717 | 718 | 738 |
| 718 | 739 | 738 |
| 718 | 719 | 739 |
| 719 | 740 | 739 |
| 719 | 720 | 740 |
| 720 | 741 | 740 |
| 720 | 721 | 741 |
| 721 | 742 | 741 |
| 721 | 722 | 742 |
| 722 | 743 | 742 |
| 722 | 723 | 743 |
| 723 | 744 | 743 |
| 723 | 724 | 744 |
| 724 | 745 | 744 |
| 724 | 725 | 745 |
| 725 | 746 | 745 |
| 725 | 726 | 746 |
| 726 | 747 | 746 |
| 726 | 727 | 747 |
| 727 | 748 | 747 |
| 727 | 728 | 748 |
| 728 | 749 | 748 |
| 728 | 729 | 749 |
| 729 | 750 | 749 |
| 729 | 730 | 750 |

|     |     |     |
|-----|-----|-----|
| 730 | 751 | 750 |
| 730 | 731 | 751 |
| 731 | 752 | 751 |
| 731 | 732 | 752 |
| 732 | 753 | 752 |
| 732 | 733 | 753 |
| 733 | 754 | 753 |
| 733 | 734 | 754 |
| 734 | 755 | 754 |
| 734 | 735 | 755 |
| 735 | 756 | 755 |
| 736 | 737 | 757 |
| 737 | 758 | 757 |
| 737 | 738 | 758 |
| 738 | 759 | 758 |
| 738 | 739 | 759 |
| 739 | 760 | 759 |
| 739 | 740 | 760 |
| 740 | 761 | 760 |
| 740 | 741 | 761 |
| 741 | 762 | 761 |
| 741 | 742 | 762 |
| 742 | 763 | 762 |
| 742 | 743 | 763 |
| 743 | 764 | 763 |
| 743 | 744 | 764 |

|     |     |     |
|-----|-----|-----|
| 744 | 765 | 764 |
| 744 | 745 | 765 |
| 745 | 766 | 765 |
| 745 | 746 | 766 |
| 746 | 767 | 766 |
| 746 | 747 | 767 |
| 747 | 768 | 767 |
| 747 | 748 | 768 |
| 748 | 769 | 768 |
| 748 | 749 | 769 |
| 749 | 770 | 769 |
| 749 | 750 | 770 |
| 750 | 771 | 770 |
| 750 | 751 | 771 |
| 751 | 772 | 771 |
| 751 | 752 | 772 |
| 752 | 773 | 772 |
| 752 | 753 | 773 |
| 753 | 774 | 773 |
| 753 | 754 | 774 |
| 754 | 775 | 774 |
| 754 | 755 | 775 |
| 755 | 776 | 775 |
| 755 | 756 | 776 |
| 756 | 777 | 776 |
| 757 | 758 | 778 |

|     |     |     |
|-----|-----|-----|
| 758 | 779 | 778 |
| 758 | 759 | 779 |
| 759 | 780 | 779 |
| 759 | 760 | 780 |
| 760 | 781 | 780 |
| 760 | 761 | 781 |
| 761 | 782 | 781 |
| 761 | 762 | 782 |
| 762 | 783 | 782 |
| 762 | 763 | 783 |
| 763 | 784 | 783 |
| 763 | 764 | 784 |
| 764 | 785 | 784 |
| 764 | 765 | 785 |
| 765 | 786 | 785 |
| 765 | 766 | 786 |
| 766 | 787 | 786 |
| 766 | 767 | 787 |
| 767 | 788 | 787 |
| 767 | 768 | 788 |
| 768 | 789 | 788 |
| 768 | 769 | 789 |
| 769 | 790 | 789 |
| 769 | 770 | 790 |
| 770 | 791 | 790 |
| 770 | 771 | 791 |

|     |     |     |
|-----|-----|-----|
| 771 | 792 | 791 |
| 771 | 772 | 792 |
| 772 | 793 | 792 |
| 772 | 773 | 793 |
| 773 | 794 | 793 |
| 773 | 774 | 794 |
| 774 | 795 | 794 |
| 774 | 775 | 795 |
| 775 | 796 | 795 |
| 775 | 776 | 796 |
| 776 | 797 | 796 |
| 776 | 777 | 797 |
| 777 | 798 | 797 |
| 778 | 779 | 799 |
| 779 | 800 | 799 |
| 779 | 780 | 800 |
| 780 | 801 | 800 |
| 780 | 781 | 801 |
| 781 | 802 | 801 |
| 781 | 782 | 802 |
| 782 | 803 | 802 |
| 782 | 783 | 803 |
| 783 | 804 | 803 |
| 783 | 784 | 804 |
| 784 | 805 | 804 |
| 784 | 785 | 805 |



|     |     |     |
|-----|-----|-----|
| 785 | 806 | 805 |
| 785 | 786 | 806 |
| 786 | 807 | 806 |
| 786 | 787 | 807 |
| 787 | 808 | 807 |
| 787 | 788 | 808 |
| 788 | 809 | 808 |
| 788 | 789 | 809 |
| 789 | 810 | 809 |
| 789 | 790 | 810 |
| 790 | 811 | 810 |
| 790 | 791 | 811 |
| 791 | 812 | 811 |
| 791 | 792 | 812 |
| 792 | 813 | 812 |
| 792 | 793 | 813 |
| 793 | 814 | 813 |
| 793 | 794 | 814 |
| 794 | 815 | 814 |
| 794 | 795 | 815 |
| 795 | 816 | 815 |
| 795 | 796 | 816 |
| 796 | 817 | 816 |
| 796 | 797 | 817 |
| 797 | 818 | 817 |
| 797 | 798 | 818 |

|     |     |     |
|-----|-----|-----|
| 798 | 819 | 818 |
| 799 | 800 | 820 |
| 800 | 821 | 820 |
| 800 | 801 | 821 |
| 801 | 822 | 821 |
| 801 | 802 | 822 |
| 802 | 823 | 822 |
| 802 | 803 | 823 |
| 803 | 824 | 823 |
| 803 | 804 | 824 |
| 804 | 825 | 824 |
| 804 | 805 | 825 |
| 805 | 826 | 825 |
| 805 | 806 | 826 |
| 806 | 827 | 826 |
| 806 | 807 | 827 |
| 807 | 828 | 827 |
| 807 | 808 | 828 |
| 808 | 829 | 828 |
| 808 | 809 | 829 |
| 809 | 830 | 829 |
| 809 | 810 | 830 |
| 810 | 831 | 830 |
| 810 | 811 | 831 |
| 811 | 832 | 831 |
| 811 | 812 | 832 |

|     |     |     |
|-----|-----|-----|
| 812 | 833 | 832 |
| 812 | 813 | 833 |
| 813 | 834 | 833 |
| 813 | 814 | 834 |
| 814 | 835 | 834 |
| 814 | 815 | 835 |
| 815 | 836 | 835 |
| 815 | 816 | 836 |
| 816 | 837 | 836 |
| 816 | 817 | 837 |
| 817 | 838 | 837 |
| 817 | 818 | 838 |
| 818 | 839 | 838 |
| 818 | 819 | 839 |
| 819 | 840 | 839 |
| 820 | 821 | 1   |
| 821 | 2   | 1   |
| 821 | 822 | 2   |
| 822 | 3   | 2   |
| 822 | 823 | 3   |
| 823 | 4   | 3   |
| 823 | 824 | 4   |
| 824 | 5   | 4   |
| 824 | 825 | 5   |
| 825 | 6   | 5   |
| 825 | 826 | 6   |

|     |     |    |
|-----|-----|----|
| 826 | 7   | 6  |
| 826 | 827 | 7  |
| 827 | 8   | 7  |
| 827 | 828 | 8  |
| 828 | 9   | 8  |
| 828 | 829 | 9  |
| 829 | 10  | 9  |
| 829 | 830 | 10 |
| 830 | 11  | 10 |
| 830 | 831 | 11 |
| 831 | 12  | 11 |
| 831 | 832 | 12 |
| 832 | 13  | 12 |
| 832 | 833 | 13 |
| 833 | 14  | 13 |
| 833 | 834 | 14 |
| 834 | 15  | 14 |
| 834 | 835 | 15 |
| 835 | 16  | 15 |
| 835 | 836 | 16 |
| 836 | 17  | 16 |
| 836 | 837 | 17 |
| 837 | 18  | 17 |
| 837 | 838 | 18 |
| 838 | 19  | 18 |
| 838 | 839 | 19 |

|     |     |    |
|-----|-----|----|
| 839 | 20  | 19 |
| 839 | 840 | 20 |
| 840 | 21  | 20 |

### (b) Scheme 2

| VARIABLES = X, Y, T " |                  |                         |           |
|-----------------------|------------------|-------------------------|-----------|
| ZONE                  | N= 840 ,E = 1600 | ,f=FEPOINT, ET=TRIANGLE |           |
|                       | 0.05             | 0                       | 9.3047055 |
|                       | 5.70E-02         | 0                       | 10.421901 |
|                       | 6.47E-02         | 0                       | 11.494063 |
|                       | 7.31E-02         | 0                       | 12.523068 |
|                       | 0.082412047      | 0                       | 13.508888 |
|                       | 9.26E-02         | 0                       | 14.449692 |
|                       | 0.103884662      | 0                       | 15.341927 |
|                       | 0.116256978      | 0                       | 16.180455 |
|                       | 0.129866526      | 0                       | 16.958791 |
|                       | 0.144837029      | 0                       | 17.669519 |
|                       | 0.161304581      | 0                       | 18.304946 |
|                       | 0.179418889      | 0                       | 18.858041 |
|                       | 0.199344628      | 0                       | 19.3236   |
|                       | 0.221262941      | 0                       | 19.699527 |
|                       | 0.245373085      | 0                       | 19.987961 |
|                       | 0.271894243      | 0                       | 20.195886 |
|                       | 0.301067518      | 0                       | 20.334878 |
|                       | 0.333158119      | 0                       | 20.419844 |

|             |             |           |
|-------------|-------------|-----------|
| 0.368457781 | 0           | 20.46705  |
| 0.407287409 | 0           | 20.492443 |
| 0.45        | 0           | 20.5      |
| 4.94E-02    | 7.82E-03    | 9.3031863 |
| 0.056379015 | 8.97E-03    | 10.435441 |
| 6.41E-02    | 1.02E-02    | 11.519972 |
| 7.25E-02    | 1.16E-02    | 12.559092 |
| 0.081846345 | 1.32E-02    | 13.553023 |
| 9.21E-02    | 0.014844815 | 14.500064 |
| 0.103352005 | 1.67E-02    | 15.396718 |
| 0.115743362 | 1.87E-02    | 16.237851 |
| 0.129373854 | 2.10E-02    | 17.016958 |
| 0.144367396 | 2.34E-02    | 17.726604 |
| 0.160860291 | 2.62E-02    | 18.359119 |
| 0.179002477 | 2.91E-02    | 18.907564 |
| 0.19895888  | 0.03242145  | 19.366954 |
| 0.220910924 | 3.60E-02    | 19.735578 |
| 0.245058173 | 4.00E-02    | 20.016128 |
| 0.271620146 | 4.44E-02    | 20.216275 |
| 0.300838317 | 4.92E-02    | 20.348302 |
| 0.332978305 | 5.45E-02    | 20.42766  |
| 0.368332291 | 6.03E-02    | 20.470814 |
| 0.407221676 | 6.67E-02    | 20.493397 |
| 0.45        | 7.37E-02    | 20.5      |
| 4.76E-02    | 1.55E-02    | 9.3021977 |
| 5.46E-02    | 1.79E-02    | 10.485237 |

|             |             |           |
|-------------|-------------|-----------|
| 6.23E-02    | 2.06E-02    | 11.611458 |
| 7.08E-02    | 2.35E-02    | 12.684514 |
| 8.02E-02    | 2.67E-02    | 13.705392 |
| 0.090450779 | 3.03E-02    | 14.672772 |
| 0.101767151 | 0.034221271 | 15.583286 |
| 0.11421516  | 3.85E-02    | 16.431776 |
| 0.12790797  | 4.33E-02    | 17.211657 |
| 0.142970061 | 4.85E-02    | 17.915493 |
| 0.159538361 | 5.42E-02    | 18.535827 |
| 0.177763492 | 6.05E-02    | 19.066312 |
| 0.197811135 | 6.75E-02    | 19.503068 |
| 0.219863542 | 7.51E-02    | 19.846055 |
| 0.244121191 | 8.35E-02    | 20.100128 |
| 0.270804604 | 9.27E-02    | 20.275327 |
| 0.300156358 | 0.10290882  | 20.386048 |
| 0.332443288 | 0.114087402 | 20.449077 |
| 0.367958911 | 0.126383842 | 20.481    |
| 0.407026096 | 0.139909926 | 20.496067 |
| 0.45        | 0.154788619 | 20.5      |
| 4.46E-02    | 2.27E-02    | 9.3020971 |
| 5.16E-02    | 2.66E-02    | 10.576791 |
| 5.94E-02    | 3.08E-02    | 11.776986 |
| 6.80E-02    | 3.55E-02    | 12.909142 |
| 0.077403961 | 4.06E-02    | 13.975815 |
| 8.78E-02    | 4.63E-02    | 14.976488 |
| 9.92E-02    | 0.052508092 | 15.908107 |

|             |             |           |
|-------------|-------------|-----------|
| 0.111710002 | 5.94E-02    | 16.765565 |
| 0.125504969 | 6.69E-02    | 17.542305 |
| 0.140679432 | 7.52E-02    | 18.231157 |
| 0.157371342 | 8.43E-02    | 18.825466 |
| 0.175732442 | 9.43E-02    | 19.320492 |
| 0.195929653 | 0.105315787 | 19.714934 |
| 0.218146585 | 0.117440824 | 20.012275 |
| 0.24258521  | 0.130778364 | 20.22148  |
| 0.269467698 | 0.145449658 | 20.356608 |
| 0.299038434 | 0.161588081 | 20.43511  |
| 0.331566244 | 0.179340347 | 20.475103 |
| 0.367346835 | 0.19886784  | 20.492463 |
| 0.406705485 | 0.220348082 | 20.498825 |
| 0.45        | 0.243976348 | 20.5      |
| 4.05E-02    | 2.94E-02    | 9.3032073 |
| 4.76E-02    | 3.48E-02    | 10.712623 |
| 5.55E-02    | 4.09E-02    | 12.018406 |
| 6.41E-02    | 4.75E-02    | 13.232207 |
| 7.36E-02    | 5.47E-02    | 14.359478 |
| 8.41E-02    | 6.27E-02    | 15.401249 |
| 9.56E-02    | 7.15E-02    | 16.355207 |
| 0.108289573 | 8.12E-02    | 17.216655 |
| 0.122224019 | 9.18E-02    | 17.979573 |
| 0.137551911 | 0.103526589 | 18.637931 |
| 0.154412592 | 0.116399834 | 19.187252 |
| 0.17295934  | 0.130560404 | 19.626299 |



|             |             |           |
|-------------|-------------|-----------|
| 0.193360764 | 0.146137031 | 19.958608 |
| 0.21580233  | 0.163271321 | 20.19341  |
| 0.240488052 | 0.182119039 | 20.345456 |
| 0.267642347 | 0.202851529 | 20.433468 |
| 0.297512071 | 0.225657269 | 20.477373 |
| 0.330368768 | 0.250743582 | 20.495107 |
| 0.366511134 | 0.278338527 | 20.500107 |
| 0.406267737 | 0.308692966 | 20.500364 |
| 0.45        | 0.342082849 | 20.5      |
| 3.54E-02    | 3.54E-02    | 9.3055989 |
| 4.26E-02    | 4.26E-02    | 10.891988 |
| 5.06E-02    | 5.06E-02    | 12.330851 |
| 5.93E-02    | 5.93E-02    | 13.642673 |
| 6.90E-02    | 6.90E-02    | 14.837997 |
| 7.96E-02    | 7.96E-02    | 15.920586 |
| 9.12E-02    | 9.12E-02    | 16.889659 |
| 0.104038095 | 0.104038095 | 17.741787 |
| 0.118145911 | 0.118145911 | 18.472782 |
| 0.133664508 | 0.133664508 | 19.079681 |
| 0.150734965 | 0.150734965 | 19.56271  |
| 0.169512468 | 0.169512468 | 19.926961 |
| 0.190167721 | 0.190167721 | 20.183333 |
| 0.212888499 | 0.212888499 | 20.348336 |
| 0.237881356 | 0.237881356 | 20.4425   |
| 0.265373497 | 0.265373497 | 20.487624 |
| 0.295614853 | 0.295614853 | 20.50355  |

|             |             |           |
|-------------|-------------|-----------|
| 0.328880345 | 0.328880345 | 20.505537 |
| 0.365472386 | 0.365472386 | 20.503106 |
| 0.405723631 | 0.405723631 | 20.500644 |
| 0.45        | 0.45        | 20.5      |
| 2.94E-02    | 4.05E-02    | 9.3081349 |
| 3.48E-02    | 4.76E-02    | 10.719626 |
| 4.09E-02    | 5.55E-02    | 12.027549 |
| 4.75E-02    | 6.41E-02    | 13.242921 |
| 5.47E-02    | 7.36E-02    | 14.37113  |
| 0.062720133 | 8.41E-02    | 15.413146 |
| 7.15E-02    | 9.56E-02    | 16.36654  |
| 8.12E-02    | 0.108289573 | 17.226513 |
| 9.18E-02    | 0.122224019 | 17.987056 |
| 0.103526589 | 0.137551911 | 18.642347 |
| 0.116399834 | 0.154412592 | 19.188353 |
| 0.130560404 | 0.17295934  | 19.62447  |
| 0.146137031 | 0.193360764 | 19.954878 |
| 0.163271321 | 0.21580233  | 20.189218 |
| 0.182119039 | 0.240488052 | 20.342195 |
| 0.202851529 | 0.267642347 | 20.43198  |
| 0.225657269 | 0.297512071 | 20.477659 |
| 0.250743582 | 0.330368768 | 20.496434 |
| 0.278338527 | 0.366511134 | 20.501455 |
| 0.308692966 | 0.406267737 | 20.500918 |
| 0.342082849 | 0.45        | 20.5      |
| 2.27E-02    | 4.46E-02    | 9.3086688 |

|             |             |           |
|-------------|-------------|-----------|
| 2.66E-02    | 5.16E-02    | 10.585822 |
| 3.08E-02    | 5.94E-02    | 11.788624 |
| 3.55E-02    | 6.80E-02    | 12.922293 |
| 4.06E-02    | 0.077403961 | 13.991114 |
| 4.63E-02    | 8.78E-02    | 14.992548 |
| 5.25E-02    | 9.92E-02    | 15.92404  |
| 5.94E-02    | 0.111710002 | 16.780343 |
| 6.69E-02    | 0.125504969 | 17.554842 |
| 7.52E-02    | 0.140679432 | 18.240472 |
| 8.43E-02    | 0.157371342 | 18.830924 |
| 9.43E-02    | 0.175732442 | 19.322046 |
| 0.105315787 | 0.195929653 | 19.713268 |
| 0.117440824 | 0.218146585 | 20.008716 |
| 0.130778364 | 0.24258521  | 20.217651 |
| 0.145449658 | 0.269467698 | 20.35389  |
| 0.161588081 | 0.299038434 | 20.434155 |
| 0.179340347 | 0.331566244 | 20.475667 |
| 0.19886784  | 0.367346835 | 20.493644 |
| 0.220348082 | 0.406705485 | 20.499484 |
| 0.243976348 | 0.45        | 20.5      |
| 1.55E-02    | 4.76E-02    | 9.3078709 |
| 1.79E-02    | 5.46E-02    | 10.492846 |
| 2.06E-02    | 6.23E-02    | 11.621145 |
| 2.35E-02    | 7.08E-02    | 12.696029 |
| 2.67E-02    | 8.02E-02    | 13.718313 |
| 3.03E-02    | 9.05E-02    | 14.686565 |

|             |             |           |
|-------------|-------------|-----------|
| 3.42E-02    | 0.101767151 | 15.597304 |
| 3.85E-02    | 0.11421516  | 16.445257 |
| 0.043271909 | 0.12790797  | 17.223768 |
| 4.85E-02    | 0.142970061 | 17.925421 |
| 5.42E-02    | 0.159538361 | 18.542933 |
| 6.05E-02    | 0.177763492 | 19.07031  |
| 6.75E-02    | 0.197811135 | 19.504165 |
| 7.51E-02    | 0.219863542 | 19.844979 |
| 8.35E-02    | 0.244121191 | 20.097973 |
| 9.27E-02    | 0.270804604 | 20.27323  |
| 0.10290882  | 0.300156358 | 20.384813 |
| 0.114087402 | 0.332443288 | 20.448925 |
| 0.126383842 | 0.367958911 | 20.481573 |
| 0.139909926 | 0.407026096 | 20.496536 |
| 0.154788619 | 0.45        | 20.5      |
| 7.82E-03    | 4.94E-02    | 9.306391  |
| 8.97E-03    | 5.64E-02    | 10.439651 |
| 1.02E-02    | 6.41E-02    | 11.525272 |
| 1.16E-02    | 7.25E-02    | 12.565385 |
| 1.32E-02    | 8.18E-02    | 13.560115 |
| 0.014844815 | 0.092087136 | 14.507696 |
| 1.67E-02    | 0.103352005 | 15.404569 |
| 1.87E-02    | 0.115743362 | 16.245541 |
| 2.10E-02    | 0.129373854 | 17.024063 |
| 2.34E-02    | 0.144367396 | 17.732695 |
| 2.62E-02    | 0.160860291 | 18.36383  |

|             |             |           |
|-------------|-------------|-----------|
| 2.91E-02    | 0.179002477 | 18.910677 |
| 3.24E-02    | 0.19895888  | 19.368479 |
| 3.60E-02    | 0.220910924 | 19.73578  |
| 4.00E-02    | 0.245058173 | 20.015492 |
| 4.44E-02    | 0.271620146 | 20.21537  |
| 4.92E-02    | 0.300838317 | 20.347607 |
| 5.45E-02    | 0.332978305 | 20.427419 |
| 0.060277407 | 0.368332291 | 20.470991 |
| 6.67E-02    | 0.407221676 | 20.493641 |
| 7.37E-02    | 0.45        | 20.5      |
| 2.33E-15    | 0.05        | 9.3047055 |
| 2.29E-15    | 5.70E-02    | 10.421901 |
| 2.25E-15    | 6.47E-02    | 11.494063 |
| 2.20E-15    | 7.31E-02    | 12.523068 |
| 2.15E-15    | 0.082412047 | 13.508888 |
| 2.09E-15    | 9.26E-02    | 14.449692 |
| 2.02E-15    | 0.103884662 | 15.341927 |
| 1.95E-15    | 0.116256978 | 16.180455 |
| 1.87E-15    | 0.129866526 | 16.958791 |
| 1.78E-15    | 0.144837029 | 17.669519 |
| 1.68E-15    | 0.161304581 | 18.304946 |
| 1.58E-15    | 0.179418889 | 18.858041 |
| 1.46E-15    | 0.199344628 | 19.3236   |
| 1.33E-15    | 0.221262941 | 19.699527 |
| 1.19E-15    | 0.245373085 | 19.987961 |
| 1.04E-15    | 0.271894243 | 20.195886 |

|             |             |           |
|-------------|-------------|-----------|
| 8.69E-16    | 0.301067518 | 20.334878 |
| 6.82E-16    | 0.333158119 | 20.419844 |
| 4.76E-16    | 0.368457781 | 20.46705  |
| 2.49E-16    | 0.407287409 | 20.492443 |
| -3.47E-32   | 0.45        | 20.5      |
| -7.82E-03   | 4.94E-02    | 9.3031863 |
| -8.97E-03   | 5.64E-02    | 10.435441 |
| -1.02E-02   | 0.064073072 | 11.519972 |
| -1.16E-02   | 7.25E-02    | 12.559092 |
| -1.32E-02   | 8.18E-02    | 13.553023 |
| -1.48E-02   | 9.21E-02    | 14.500064 |
| -1.67E-02   | 0.103352005 | 15.396718 |
| -1.87E-02   | 0.115743362 | 16.237851 |
| -2.10E-02   | 0.129373854 | 17.016958 |
| -2.34E-02   | 0.144367396 | 17.726604 |
| -2.62E-02   | 0.160860291 | 18.359119 |
| -2.91E-02   | 0.179002477 | 18.907564 |
| -3.24E-02   | 0.19895888  | 19.366954 |
| -0.03603179 | 0.220910924 | 19.735578 |
| -4.00E-02   | 0.245058173 | 20.016128 |
| -4.44E-02   | 0.271620146 | 20.216275 |
| -4.92E-02   | 0.300838317 | 20.348302 |
| -0.05446292 | 0.332978305 | 20.42766  |
| -6.03E-02   | 0.368332291 | 20.470814 |
| -0.06667334 | 0.407221676 | 20.493397 |
| -7.37E-02   | 0.45        | 20.5      |

|             |             |           |
|-------------|-------------|-----------|
| -1.55E-02   | 4.76E-02    | 9.3021977 |
| -1.79E-02   | 5.46E-02    | 10.485237 |
| -2.06E-02   | 6.23E-02    | 11.611458 |
| -2.35E-02   | 7.08E-02    | 12.684514 |
| -2.67E-02   | 8.02E-02    | 13.705392 |
| -3.03E-02   | 9.05E-02    | 14.672772 |
| -3.42E-02   | 0.101767151 | 15.583286 |
| -3.85E-02   | 0.11421516  | 16.431776 |
| -4.33E-02   | 0.12790797  | 17.211657 |
| -4.85E-02   | 0.142970061 | 17.915493 |
| -5.42E-02   | 0.159538361 | 18.535827 |
| -6.05E-02   | 0.177763492 | 19.066312 |
| -6.75E-02   | 0.197811135 | 19.503068 |
| -7.51E-02   | 0.219863542 | 19.846055 |
| -8.35E-02   | 0.244121191 | 20.100128 |
| -9.27E-02   | 0.270804604 | 20.275327 |
| -0.10290882 | 0.300156358 | 20.386048 |
| -0.1140874  | 0.332443288 | 20.449077 |
| -0.12638384 | 0.367958911 | 20.481    |
| -0.13990993 | 0.407026096 | 20.496067 |
| -0.15478862 | 0.45        | 20.5      |
| -2.27E-02   | 4.46E-02    | 9.3020971 |
| -2.66E-02   | 5.16E-02    | 10.576791 |
| -3.08E-02   | 5.94E-02    | 11.776986 |
| -3.55E-02   | 6.80E-02    | 12.909142 |
| -4.06E-02   | 7.74E-02    | 13.975815 |

|             |             |           |
|-------------|-------------|-----------|
| -4.63E-02   | 8.78E-02    | 14.976488 |
| -5.25E-02   | 9.92E-02    | 15.908107 |
| -5.94E-02   | 0.111710002 | 16.765565 |
| -6.69E-02   | 0.125504969 | 17.542305 |
| -7.52E-02   | 0.140679432 | 18.231157 |
| -8.43E-02   | 0.157371342 | 18.825466 |
| -0.09429303 | 0.175732442 | 19.320492 |
| -0.10531579 | 0.195929653 | 19.714934 |
| -0.11744082 | 0.218146585 | 20.012275 |
| -0.13077836 | 0.24258521  | 20.22148  |
| -0.14544966 | 0.269467698 | 20.356608 |
| -0.16158808 | 0.299038434 | 20.43511  |
| -0.17934035 | 0.331566244 | 20.475103 |
| -0.19886784 | 0.367346835 | 20.492463 |
| -0.22034808 | 0.406705485 | 20.498825 |
| -0.24397635 | 0.45        | 20.5      |
| -0.02938926 | 4.05E-02    | 9.3032073 |
| -3.48E-02   | 4.76E-02    | 10.712623 |
| -4.09E-02   | 0.055467056 | 12.018406 |
| -4.75E-02   | 0.064119251 | 13.232207 |
| -5.47E-02   | 7.36E-02    | 14.359478 |
| -6.27E-02   | 8.41E-02    | 15.401249 |
| -7.15E-02   | 9.56E-02    | 16.355207 |
| -8.12E-02   | 0.108289573 | 17.216655 |
| -9.18E-02   | 0.122224019 | 17.979573 |
| -0.10352659 | 0.137551911 | 18.637931 |



|             |             |           |
|-------------|-------------|-----------|
| -0.11639983 | 0.154412592 | 19.187252 |
| -0.1305604  | 0.17295934  | 19.626299 |
| -0.14613703 | 0.193360764 | 19.958608 |
| -0.16327132 | 0.21580233  | 20.19341  |
| -0.18211904 | 0.240488052 | 20.345456 |
| -0.20285153 | 0.267642347 | 20.433468 |
| -0.22565727 | 0.297512071 | 20.477373 |
| -0.25074358 | 0.330368768 | 20.495107 |
| -0.27833853 | 0.366511134 | 20.500107 |
| -0.30869297 | 0.406267737 | 20.500364 |
| -0.34208285 | 0.45        | 20.5      |
| -3.54E-02   | 3.54E-02    | 9.3055989 |
| -4.26E-02   | 4.26E-02    | 10.891988 |
| -5.06E-02   | 5.06E-02    | 12.330851 |
| -5.93E-02   | 5.93E-02    | 13.642673 |
| -6.90E-02   | 6.90E-02    | 14.837997 |
| -7.96E-02   | 7.96E-02    | 15.920586 |
| -9.12E-02   | 9.12E-02    | 16.889659 |
| -0.10403809 | 0.104038095 | 17.741787 |
| -0.11814591 | 0.118145911 | 18.472782 |
| -0.13366451 | 0.133664508 | 19.079681 |
| -0.15073497 | 0.150734965 | 19.56271  |
| -0.16951247 | 0.169512468 | 19.926961 |
| -0.19016772 | 0.190167721 | 20.183333 |
| -0.2128885  | 0.212888499 | 20.348336 |
| -0.23788136 | 0.237881356 | 20.4425   |

|             |             |           |
|-------------|-------------|-----------|
| -0.2653735  | 0.265373497 | 20.487624 |
| -0.29561485 | 0.295614853 | 20.50355  |
| -0.32888034 | 0.328880345 | 20.505537 |
| -0.36547239 | 0.365472386 | 20.503106 |
| -0.40572363 | 0.405723631 | 20.500644 |
| -0.45       | 0.45        | 20.5      |
| -4.05E-02   | 2.94E-02    | 9.3081349 |
| -4.76E-02   | 3.48E-02    | 10.719626 |
| -5.55E-02   | 4.09E-02    | 12.027549 |
| -6.41E-02   | 4.75E-02    | 13.242921 |
| -7.36E-02   | 5.47E-02    | 14.37113  |
| -8.41E-02   | 6.27E-02    | 15.413146 |
| -0.09562189 | 7.15E-02    | 16.36654  |
| -0.10828957 | 8.12E-02    | 17.226513 |
| -0.12222402 | 9.18E-02    | 17.987056 |
| -0.13755191 | 0.103526589 | 18.642347 |
| -0.15441259 | 0.116399834 | 19.188353 |
| -0.17295934 | 0.130560404 | 19.62447  |
| -0.19336076 | 0.146137031 | 19.954878 |
| -0.21580233 | 0.163271321 | 20.189218 |
| -0.24048805 | 0.182119039 | 20.342195 |
| -0.26764235 | 0.202851529 | 20.43198  |
| -0.29751207 | 0.225657269 | 20.477659 |
| -0.33036877 | 0.250743582 | 20.496434 |
| -0.36651113 | 0.278338527 | 20.501455 |
| -0.40626774 | 0.308692966 | 20.500918 |

|             |             |           |
|-------------|-------------|-----------|
| -0.45       | 0.342082849 | 20.5      |
| -4.46E-02   | 2.27E-02    | 9.3086688 |
| -5.16E-02   | 2.66E-02    | 10.585822 |
| -5.94E-02   | 3.08E-02    | 11.788624 |
| -6.80E-02   | 3.55E-02    | 12.92293  |
| -0.07740396 | 4.06E-02    | 13.991114 |
| -8.78E-02   | 4.63E-02    | 14.992548 |
| -9.92E-02   | 5.25E-02    | 15.92404  |
| -0.11171    | 5.94E-02    | 16.780343 |
| -0.12550497 | 6.69E-02    | 17.554842 |
| -0.14067943 | 0.075162616 | 18.240472 |
| -0.15737134 | 8.43E-02    | 18.830924 |
| -0.17573244 | 9.43E-02    | 19.322046 |
| -0.19592965 | 0.105315787 | 19.713268 |
| -0.21814659 | 0.117440824 | 20.008716 |
| -0.24258521 | 0.130778364 | 20.217651 |
| -0.2694677  | 0.145449658 | 20.35389  |
| -0.29903843 | 0.161588081 | 20.434155 |
| -0.33156624 | 0.179340347 | 20.475667 |
| -0.36734683 | 0.19886784  | 20.493644 |
| -0.40670548 | 0.220348082 | 20.499484 |
| -0.45       | 0.243976348 | 20.5      |
| -4.76E-02   | 1.55E-02    | 9.3078709 |
| -5.46E-02   | 1.79E-02    | 10.492846 |
| -6.23E-02   | 2.06E-02    | 11.621145 |
| -7.08E-02   | 2.35E-02    | 12.696029 |

|             |             |           |
|-------------|-------------|-----------|
| -8.02E-02   | 2.67E-02    | 13.718313 |
| -9.05E-02   | 3.03E-02    | 14.686565 |
| -0.10176715 | 3.42E-02    | 15.597304 |
| -0.11421516 | 0.038531099 | 16.445257 |
| -0.12790797 | 4.33E-02    | 17.223768 |
| -0.14297006 | 0.0484868   | 17.925421 |
| -0.15953836 | 5.42E-02    | 18.542933 |
| -0.17776349 | 6.05E-02    | 19.07031  |
| -0.19781113 | 6.75E-02    | 19.504165 |
| -0.21986354 | 7.51E-02    | 19.844979 |
| -0.24412119 | 8.35E-02    | 20.097973 |
| -0.2708046  | 9.27E-02    | 20.27323  |
| -0.30015636 | 0.10290882  | 20.384813 |
| -0.33244329 | 0.114087402 | 20.448925 |
| -0.36795891 | 0.126383842 | 20.481573 |
| -0.4070261  | 0.139909926 | 20.496536 |
| -0.45       | 0.154788619 | 20.5      |
| -4.94E-02   | 7.82E-03    | 9.306391  |
| -5.64E-02   | 8.97E-03    | 10.439651 |
| -0.06407307 | 1.02E-02    | 11.525272 |
| -7.25E-02   | 1.16E-02    | 12.565385 |
| -8.18E-02   | 1.32E-02    | 13.560115 |
| -9.21E-02   | 1.48E-02    | 14.507696 |
| -0.10335201 | 1.67E-02    | 15.404569 |
| -0.11574336 | 1.87E-02    | 16.245541 |
| -0.12937385 | 0.020977166 | 17.024063 |

|             |             |           |
|-------------|-------------|-----------|
| -0.1443674  | 0.023443075 | 17.732695 |
| -0.16086029 | 2.62E-02    | 18.36383  |
| -0.17900248 | 0.029139325 | 18.910677 |
| -0.19895888 | 3.24E-02    | 19.368479 |
| -0.22091092 | 3.60E-02    | 19.73578  |
| -0.24505817 | 4.00E-02    | 20.015492 |
| -0.27162015 | 4.44E-02    | 20.21537  |
| -0.30083832 | 4.92E-02    | 20.347607 |
| -0.3329783  | 0.054462922 | 20.427419 |
| -0.36833229 | 6.03E-02    | 20.470991 |
| -0.40722168 | 6.67E-02    | 20.493641 |
| -0.45       | 7.37E-02    | 20.5      |
| -0.05       | 4.67E-15    | 9.3047055 |
| -5.70E-02   | 4.59E-15    | 10.421901 |
| -6.47E-02   | 4.50E-15    | 11.494063 |
| -7.31E-02   | 4.40E-15    | 12.523068 |
| -0.08241205 | 4.29E-15    | 13.508888 |
| -9.26E-02   | 4.17E-15    | 14.449692 |
| -0.10388466 | 4.04E-15    | 15.341927 |
| -0.11625698 | 3.90E-15    | 16.180455 |
| -0.12986653 | 3.74E-15    | 16.958791 |
| -0.14483703 | 3.56E-15    | 17.669519 |
| -0.16130458 | 3.37E-15    | 18.304946 |
| -0.17941889 | 3.16E-15    | 18.858041 |
| -0.19934463 | 2.93E-15    | 19.3236   |
| -0.22126294 | 2.67E-15    | 19.699527 |

|             |             |           |
|-------------|-------------|-----------|
| -0.24537308 | 2.39E-15    | 19.987961 |
| -0.27189424 | 2.08E-15    | 20.195886 |
| -0.30106752 | 1.74E-15    | 20.334878 |
| -0.33315812 | 1.36E-15    | 20.419844 |
| -0.36845778 | 9.52E-16    | 20.46705  |
| -0.40728741 | 4.99E-16    | 20.492443 |
| -0.45       | -6.93E-32   | 20.5      |
| -4.94E-02   | -7.82E-03   | 9.3031863 |
| -5.64E-02   | -8.97E-03   | 10.435441 |
| -6.41E-02   | -1.02E-02   | 11.519972 |
| -7.25E-02   | -0.01162943 | 12.559092 |
| -8.18E-02   | -1.32E-02   | 13.553023 |
| -0.09208714 | -1.48E-02   | 14.500064 |
| -0.10335201 | -1.67E-02   | 15.396718 |
| -0.11574336 | -1.87E-02   | 16.237851 |
| -0.12937385 | -2.10E-02   | 17.016958 |
| -0.1443674  | -2.34E-02   | 17.726604 |
| -0.16086029 | -2.62E-02   | 18.359119 |
| -0.17900248 | -2.91E-02   | 18.907564 |
| -0.19895888 | -3.24E-02   | 19.366954 |
| -0.22091092 | -3.60E-02   | 19.735578 |
| -0.24505817 | -4.00E-02   | 20.016128 |
| -0.27162015 | -4.44E-02   | 20.216275 |
| -0.30083832 | -0.04917703 | 20.348302 |
| -0.3329783  | -5.45E-02   | 20.42766  |
| -0.36833229 | -6.03E-02   | 20.470814 |

|             |             |           |
|-------------|-------------|-----------|
| -0.40722168 | -6.67E-02   | 20.493397 |
| -0.45       | -7.37E-02   | 20.5      |
| -4.76E-02   | -1.55E-02   | 9.3021977 |
| -5.46E-02   | -1.79E-02   | 10.485237 |
| -6.23E-02   | -2.06E-02   | 11.611458 |
| -7.08E-02   | -2.35E-02   | 12.684514 |
| -8.02E-02   | -2.67E-02   | 13.705392 |
| -9.05E-02   | -3.03E-02   | 14.672772 |
| -0.10176715 | -3.42E-02   | 15.583286 |
| -0.11421516 | -3.85E-02   | 16.431776 |
| -0.12790797 | -4.33E-02   | 17.211657 |
| -0.14297006 | -4.85E-02   | 17.915493 |
| -0.15953836 | -5.42E-02   | 18.535827 |
| -0.17776349 | -6.05E-02   | 19.066312 |
| -0.19781113 | -6.75E-02   | 19.503068 |
| -0.21986354 | -7.51E-02   | 19.846055 |
| -0.24412119 | -8.35E-02   | 20.100128 |
| -0.2708046  | -9.27E-02   | 20.275327 |
| -0.30015636 | -0.10290882 | 20.386048 |
| -0.33244329 | -0.1140874  | 20.449077 |
| -0.36795891 | -0.12638384 | 20.481    |
| -0.4070261  | -0.13990993 | 20.496067 |
| -0.45       | -0.15478862 | 20.5      |
| -4.46E-02   | -2.27E-02   | 9.3020971 |
| -5.16E-02   | -2.66E-02   | 10.576791 |
| -5.94E-02   | -3.08E-02   | 11.776986 |

|             |             |           |
|-------------|-------------|-----------|
| -6.80E-02   | -3.55E-02   | 12.909142 |
| -7.74E-02   | -4.06E-02   | 13.975815 |
| -8.78E-02   | -4.63E-02   | 14.976488 |
| -9.92E-02   | -5.25E-02   | 15.908107 |
| -0.11171    | -5.94E-02   | 16.765565 |
| -0.12550497 | -6.69E-02   | 17.542305 |
| -0.14067943 | -7.52E-02   | 18.231157 |
| -0.15737134 | -8.43E-02   | 18.825466 |
| -0.17573244 | -9.43E-02   | 19.320492 |
| -0.19592965 | -0.10531579 | 19.714934 |
| -0.21814659 | -0.11744082 | 20.012275 |
| -0.24258521 | -0.13077836 | 20.22148  |
| -0.2694677  | -0.14544966 | 20.356608 |
| -0.29903843 | -0.16158808 | 20.43511  |
| -0.33156624 | -0.17934035 | 20.475103 |
| -0.36734683 | -0.19886784 | 20.492463 |
| -0.40670548 | -0.22034808 | 20.498825 |
| -0.45       | -0.24397635 | 20.5      |
| -4.05E-02   | -2.94E-02   | 9.3032073 |
| -4.76E-02   | -3.48E-02   | 10.712623 |
| -5.55E-02   | -4.09E-02   | 12.018406 |
| -6.41E-02   | -4.75E-02   | 13.232207 |
| -7.36E-02   | -5.47E-02   | 14.359478 |
| -8.41E-02   | -0.06272013 | 15.401249 |
| -9.56E-02   | -7.15E-02   | 16.355207 |
| -0.10828957 | -8.12E-02   | 17.216655 |



|             |             |           |
|-------------|-------------|-----------|
| -0.12222402 | -9.18E-02   | 17.979573 |
| -0.13755191 | -0.10352659 | 18.637931 |
| -0.15441259 | -0.11639983 | 19.187252 |
| -0.17295934 | -0.1305604  | 19.626299 |
| -0.19336076 | -0.14613703 | 19.958608 |
| -0.21580233 | -0.16327132 | 20.19341  |
| -0.24048805 | -0.18211904 | 20.345456 |
| -0.26764235 | -0.20285153 | 20.433468 |
| -0.29751207 | -0.22565727 | 20.477373 |
| -0.33036877 | -0.25074358 | 20.495107 |
| -0.36651113 | -0.27833853 | 20.500107 |
| -0.40626774 | -0.30869297 | 20.500364 |
| -0.45       | -0.34208285 | 20.5      |
| -3.54E-02   | -3.54E-02   | 9.3055989 |
| -0.04259488 | -4.26E-02   | 10.891988 |
| -5.06E-02   | -0.05055837 | 12.330851 |
| -5.93E-02   | -5.93E-02   | 13.642673 |
| -6.90E-02   | -6.90E-02   | 14.837997 |
| -7.96E-02   | -7.96E-02   | 15.920586 |
| -9.12E-02   | -9.12E-02   | 16.889659 |
| -0.10403809 | -0.10403809 | 17.741787 |
| -0.11814591 | -0.11814591 | 18.472782 |
| -0.13366451 | -0.13366451 | 19.079681 |
| -0.15073497 | -0.15073497 | 19.56271  |
| -0.16951247 | -0.16951247 | 19.926961 |
| -0.19016772 | -0.19016772 | 20.183333 |

|             |             |           |
|-------------|-------------|-----------|
| -0.2128885  | -0.2128885  | 20.348336 |
| -0.23788136 | -0.23788136 | 20.4425   |
| -0.2653735  | -0.2653735  | 20.487624 |
| -0.29561485 | -0.29561485 | 20.50355  |
| -0.32888034 | -0.32888034 | 20.505537 |
| -0.36547239 | -0.36547239 | 20.503106 |
| -0.40572363 | -0.40572363 | 20.500644 |
| -0.45       | -0.45       | 20.5      |
| -2.94E-02   | -4.05E-02   | 9.3081349 |
| -3.48E-02   | -4.76E-02   | 10.719626 |
| -4.09E-02   | -5.55E-02   | 12.027549 |
| -4.75E-02   | -6.41E-02   | 13.242921 |
| -0.05472686 | -7.36E-02   | 14.37113  |
| -6.27E-02   | -8.41E-02   | 15.413146 |
| -0.07151273 | -9.56E-02   | 16.36654  |
| -8.12E-02   | -0.10828957 | 17.226513 |
| -9.18E-02   | -0.12222402 | 17.987056 |
| -0.10352659 | -0.13755191 | 18.642347 |
| -0.11639983 | -0.15441259 | 19.188353 |
| -0.1305604  | -0.17295934 | 19.62447  |
| -0.14613703 | -0.19336076 | 19.954878 |
| -0.16327132 | -0.21580233 | 20.189218 |
| -0.18211904 | -0.24048805 | 20.342195 |
| -0.20285153 | -0.26764235 | 20.43198  |
| -0.22565727 | -0.29751207 | 20.477659 |
| -0.25074358 | -0.33036877 | 20.496434 |

|             |             |           |
|-------------|-------------|-----------|
| -0.27833853 | -0.36651113 | 20.501455 |
| -0.30869297 | -0.40626774 | 20.500918 |
| -0.34208285 | -0.45       | 20.5      |
| -0.02269952 | -4.46E-02   | 9.3086688 |
| -2.66E-02   | -5.16E-02   | 10.585822 |
| -3.08E-02   | -5.94E-02   | 11.788624 |
| -3.55E-02   | -6.80E-02   | 12.92293  |
| -4.06E-02   | -0.07740396 | 13.991114 |
| -4.63E-02   | -8.78E-02   | 14.992548 |
| -5.25E-02   | -9.92E-02   | 15.92404  |
| -5.94E-02   | -0.11171    | 16.780343 |
| -6.69E-02   | -0.12550497 | 17.554842 |
| -7.52E-02   | -0.14067943 | 18.240472 |
| -8.43E-02   | -0.15737134 | 18.830924 |
| -9.43E-02   | -0.17573244 | 19.322046 |
| -0.10531579 | -0.19592965 | 19.713268 |
| -0.11744082 | -0.21814659 | 20.008716 |
| -0.13077836 | -0.24258521 | 20.217651 |
| -0.14544966 | -0.2694677  | 20.35389  |
| -0.16158808 | -0.29903843 | 20.434155 |
| -0.17934035 | -0.33156624 | 20.475667 |
| -0.19886784 | -0.36734683 | 20.493644 |
| -0.22034808 | -0.40670548 | 20.499484 |
| -0.24397635 | -0.45       | 20.5      |
| -1.55E-02   | -4.76E-02   | 9.3078709 |
| -1.79E-02   | -5.46E-02   | 10.492846 |

|             |             |           |
|-------------|-------------|-----------|
| -0.0205597  | -6.23E-02   | 11.621145 |
| -2.35E-02   | -0.07081079 | 12.696029 |
| -2.67E-02   | -8.02E-02   | 13.718313 |
| -3.03E-02   | -9.05E-02   | 14.686565 |
| -3.42E-02   | -0.10176715 | 15.597304 |
| -3.85E-02   | -0.11421516 | 16.445257 |
| -4.33E-02   | -0.12790797 | 17.223768 |
| -4.85E-02   | -0.14297006 | 17.925421 |
| -5.42E-02   | -0.15953836 | 18.542933 |
| -6.05E-02   | -0.17776349 | 19.07031  |
| -6.75E-02   | -0.19781113 | 19.504165 |
| -7.51E-02   | -0.21986354 | 19.844979 |
| -8.35E-02   | -0.24412119 | 20.097973 |
| -9.27E-02   | -0.2708046  | 20.27323  |
| -0.10290882 | -0.30015636 | 20.384813 |
| -0.1140874  | -0.33244329 | 20.448925 |
| -0.12638384 | -0.36795891 | 20.481573 |
| -0.13990993 | -0.4070261  | 20.496536 |
| -0.15478862 | -0.45       | 20.5      |
| -7.82E-03   | -4.94E-02   | 9.306391  |
| -8.97E-03   | -0.05637901 | 10.439651 |
| -1.02E-02   | -6.41E-02   | 11.525272 |
| -1.16E-02   | -7.25E-02   | 12.565385 |
| -1.32E-02   | -0.08184635 | 13.560115 |
| -1.48E-02   | -9.21E-02   | 14.507696 |
| -1.67E-02   | -0.10335201 | 15.404569 |

|             |             |           |
|-------------|-------------|-----------|
| -1.87E-02   | -0.11574336 | 16.245541 |
| -2.10E-02   | -0.12937385 | 17.024063 |
| -2.34E-02   | -0.1443674  | 17.732695 |
| -2.62E-02   | -0.16086029 | 18.36383  |
| -2.91E-02   | -0.17900248 | 18.910677 |
| -3.24E-02   | -0.19895888 | 19.368479 |
| -3.60E-02   | -0.22091092 | 19.73578  |
| -0.04000316 | -0.24505817 | 20.015492 |
| -4.44E-02   | -0.27162015 | 20.21537  |
| -4.92E-02   | -0.30083832 | 20.347607 |
| -5.45E-02   | -0.3329783  | 20.427419 |
| -0.06027741 | -0.36833229 | 20.470991 |
| -6.67E-02   | -0.40722168 | 20.493641 |
| -7.37E-02   | -0.45       | 20.5      |
| -7.03E-15   | -0.05       | 9.3047055 |
| -6.90E-15   | -5.70E-02   | 10.421901 |
| -6.77E-15   | -6.47E-02   | 11.494063 |
| -6.62E-15   | -7.31E-02   | 12.523068 |
| -6.46E-15   | -0.08241205 | 13.508888 |
| -6.28E-15   | -9.26E-02   | 14.449692 |
| -6.08E-15   | -0.10388466 | 15.341927 |
| -5.86E-15   | -0.11625698 | 16.180455 |
| -5.62E-15   | -0.12986653 | 16.958791 |
| -5.36E-15   | -0.14483703 | 17.669519 |
| -5.07E-15   | -0.16130458 | 18.304946 |
| -4.75E-15   | -0.17941889 | 18.858041 |

|             |             |           |
|-------------|-------------|-----------|
| -4.40E-15   | -0.19934463 | 19.3236   |
| -4.02E-15   | -0.22126294 | 19.699527 |
| -3.59E-15   | -0.24537308 | 19.987961 |
| -3.13E-15   | -0.27189424 | 20.195886 |
| -2.62E-15   | -0.30106752 | 20.334878 |
| -2.05E-15   | -0.33315812 | 20.419844 |
| -1.43E-15   | -0.36845778 | 20.46705  |
| -7.50E-16   | -0.40728741 | 20.492443 |
| 3.46E-31    | -0.45       | 20.5      |
| 7.82E-03    | -0.04938442 | 9.3031863 |
| 8.97E-03    | -5.64E-02   | 10.435441 |
| 0.010237489 | -6.41E-02   | 11.519972 |
| 1.16E-02    | -7.25E-02   | 12.559092 |
| 1.32E-02    | -0.08184635 | 13.553023 |
| 1.48E-02    | -9.21E-02   | 14.500064 |
| 1.67E-02    | -0.10335201 | 15.396718 |
| 1.87E-02    | -0.11574336 | 16.237851 |
| 2.10E-02    | -0.12937385 | 17.016958 |
| 2.34E-02    | -0.1443674  | 17.726604 |
| 2.62E-02    | -0.16086029 | 18.359119 |
| 2.91E-02    | -0.17900248 | 18.907564 |
| 3.24E-02    | -0.19895888 | 19.366954 |
| 3.60E-02    | -0.22091092 | 19.735578 |
| 0.040003159 | -0.24505817 | 20.016128 |
| 4.44E-02    | -0.27162015 | 20.216275 |
| 4.92E-02    | -0.30083832 | 20.348302 |

|             |             |           |
|-------------|-------------|-----------|
| 5.45E-02    | -0.3329783  | 20.42766  |
| 6.03E-02    | -0.36833229 | 20.470814 |
| 6.67E-02    | -0.40722168 | 20.493397 |
| 7.37E-02    | -0.45       | 20.5      |
| 1.55E-02    | -0.04755283 | 9.3021977 |
| 1.79E-02    | -5.46E-02   | 10.485237 |
| 2.06E-02    | -6.23E-02   | 11.611458 |
| 2.35E-02    | -7.08E-02   | 12.684514 |
| 2.67E-02    | -8.02E-02   | 13.705392 |
| 3.03E-02    | -9.05E-02   | 14.672772 |
| 3.42E-02    | -0.10176715 | 15.583286 |
| 3.85E-02    | -0.11421516 | 16.431776 |
| 4.33E-02    | -0.12790797 | 17.211657 |
| 4.85E-02    | -0.14297006 | 17.915493 |
| 5.42E-02    | -0.15953836 | 18.535827 |
| 6.05E-02    | -0.17776349 | 19.066312 |
| 6.75E-02    | -0.19781113 | 19.503068 |
| 7.51E-02    | -0.21986354 | 19.846055 |
| 8.35E-02    | -0.24412119 | 20.100128 |
| 9.27E-02    | -0.2708046  | 20.275327 |
| 0.10290882  | -0.30015636 | 20.386048 |
| 0.114087402 | -0.33244329 | 20.449077 |
| 0.126383842 | -0.36795891 | 20.481    |
| 0.139909926 | -0.4070261  | 20.496067 |
| 0.154788619 | -0.45       | 20.5      |
| 2.27E-02    | -4.46E-02   | 9.3020971 |

|             |             |           |
|-------------|-------------|-----------|
| 2.66E-02    | -5.16E-02   | 10.576791 |
| 3.08E-02    | -5.94E-02   | 11.776986 |
| 3.55E-02    | -6.80E-02   | 12.909142 |
| 0.040629612 | -7.74E-02   | 13.975815 |
| 4.63E-02    | -8.78E-02   | 14.976488 |
| 5.25E-02    | -0.09916912 | 15.908107 |
| 5.94E-02    | -0.11171    | 16.765565 |
| 6.69E-02    | -0.12550497 | 17.542305 |
| 7.52E-02    | -0.14067943 | 18.231157 |
| 8.43E-02    | -0.15737134 | 18.825466 |
| 9.43E-02    | -0.17573244 | 19.320492 |
| 0.105315787 | -0.19592965 | 19.714934 |
| 0.117440824 | -0.21814659 | 20.012275 |
| 0.130778364 | -0.24258521 | 20.22148  |
| 0.145449658 | -0.2694677  | 20.356608 |
| 0.161588081 | -0.29903843 | 20.43511  |
| 0.179340347 | -0.33156624 | 20.475103 |
| 0.19886784  | -0.36734683 | 20.492463 |
| 0.220348082 | -0.40670548 | 20.498825 |
| 0.243976348 | -0.45       | 20.5      |
| 2.94E-02    | -0.04045085 | 9.3032073 |
| 3.48E-02    | -4.76E-02   | 10.712623 |
| 4.09E-02    | -5.55E-02   | 12.018406 |
| 4.75E-02    | -6.41E-02   | 13.232207 |
| 5.47E-02    | -7.36E-02   | 14.359478 |
| 6.27E-02    | -0.08410582 | 15.401249 |



|             |             |           |
|-------------|-------------|-----------|
| 7.15E-02    | -9.56E-02   | 16.355207 |
| 0.081184593 | -0.10828957 | 17.216655 |
| 9.18E-02    | -0.12222402 | 17.979573 |
| 0.103526589 | -0.13755191 | 18.637931 |
| 0.116399834 | -0.15441259 | 19.187252 |
| 0.130560404 | -0.17295934 | 19.626299 |
| 0.146137031 | -0.19336076 | 19.958608 |
| 0.163271321 | -0.21580233 | 20.19341  |
| 0.182119039 | -0.24048805 | 20.345456 |
| 0.202851529 | -0.26764235 | 20.433468 |
| 0.225657269 | -0.29751207 | 20.477373 |
| 0.250743582 | -0.33036877 | 20.495107 |
| 0.278338527 | -0.36651113 | 20.500107 |
| 0.308692966 | -0.40626774 | 20.500364 |
| 0.342082849 | -0.45       | 20.5      |
| 3.54E-02    | -3.54E-02   | 9.3055989 |
| 4.26E-02    | -4.26E-02   | 10.891988 |
| 5.06E-02    | -5.06E-02   | 12.330851 |
| 5.93E-02    | -5.93E-02   | 13.642673 |
| 6.90E-02    | -6.90E-02   | 14.837997 |
| 7.96E-02    | -7.96E-02   | 15.920586 |
| 0.091212808 | -0.09121281 | 16.889659 |
| 0.104038095 | -0.10403809 | 17.741787 |
| 0.118145911 | -0.11814591 | 18.472782 |
| 0.133664508 | -0.13366451 | 19.079681 |
| 0.150734965 | -0.15073497 | 19.56271  |

|             |             |           |
|-------------|-------------|-----------|
| 0.169512468 | -0.16951247 | 19.926961 |
| 0.190167721 | -0.19016772 | 20.183333 |
| 0.212888499 | -0.2128885  | 20.348336 |
| 0.237881356 | -0.23788136 | 20.4425   |
| 0.265373497 | -0.2653735  | 20.487624 |
| 0.295614853 | -0.29561485 | 20.50355  |
| 0.328880345 | -0.32888034 | 20.505537 |
| 0.365472386 | -0.36547239 | 20.503106 |
| 0.405723631 | -0.40572363 | 20.500644 |
| 0.45        | -0.45       | 20.5      |
| 4.05E-02    | -2.94E-02   | 9.3081349 |
| 4.76E-02    | -3.48E-02   | 10.719626 |
| 5.55E-02    | -4.09E-02   | 12.027549 |
| 6.41E-02    | -4.75E-02   | 13.242921 |
| 7.36E-02    | -5.47E-02   | 14.37113  |
| 8.41E-02    | -6.27E-02   | 15.413146 |
| 9.56E-02    | -7.15E-02   | 16.36654  |
| 0.108289573 | -0.08118459 | 17.226513 |
| 0.122224019 | -9.18E-02   | 17.987056 |
| 0.137551911 | -0.10352659 | 18.642347 |
| 0.154412592 | -0.11639983 | 19.188353 |
| 0.17295934  | -0.1305604  | 19.62447  |
| 0.193360764 | -0.14613703 | 19.954878 |
| 0.21580233  | -0.16327132 | 20.189218 |
| 0.240488052 | -0.18211904 | 20.342195 |
| 0.267642347 | -0.20285153 | 20.43198  |

|             |             |           |
|-------------|-------------|-----------|
| 0.297512071 | -0.22565727 | 20.477659 |
| 0.330368768 | -0.25074358 | 20.496434 |
| 0.366511134 | -0.27833853 | 20.501455 |
| 0.406267737 | -0.30869297 | 20.500918 |
| 0.45        | -0.34208285 | 20.5      |
| 4.46E-02    | -0.02269952 | 9.3086688 |
| 5.16E-02    | -2.66E-02   | 10.585822 |
| 5.94E-02    | -3.08E-02   | 11.788624 |
| 6.80E-02    | -3.55E-02   | 12.92293  |
| 7.74E-02    | -4.06E-02   | 13.991114 |
| 8.78E-02    | -4.63E-02   | 14.992548 |
| 9.92E-02    | -5.25E-02   | 15.92404  |
| 0.111710002 | -0.05935236 | 16.780343 |
| 0.125504969 | -6.69E-02   | 17.554842 |
| 0.140679432 | -7.52E-02   | 18.240472 |
| 0.157371342 | -8.43E-02   | 18.830924 |
| 0.175732442 | -9.43E-02   | 19.322046 |
| 0.195929653 | -0.10531579 | 19.713268 |
| 0.218146585 | -0.11744082 | 20.008716 |
| 0.24258521  | -0.13077836 | 20.217651 |
| 0.269467698 | -0.14544966 | 20.35389  |
| 0.299038434 | -0.16158808 | 20.434155 |
| 0.331566244 | -0.17934035 | 20.475667 |
| 0.367346835 | -0.19886784 | 20.493644 |
| 0.406705485 | -0.22034808 | 20.499484 |
| 0.45        | -0.24397635 | 20.5      |

|             |             |           |
|-------------|-------------|-----------|
| 4.76E-02    | -1.55E-02   | 9.3078709 |
| 5.46E-02    | -1.79E-02   | 10.492846 |
| 0.062308637 | -2.06E-02   | 11.621145 |
| 7.08E-02    | -0.02350337 | 12.696029 |
| 8.02E-02    | -0.02674141 | 13.718313 |
| 9.05E-02    | -3.03E-02   | 14.686565 |
| 0.101767151 | -3.42E-02   | 15.597304 |
| 0.11421516  | -3.85E-02   | 16.445257 |
| 0.12790797  | -4.33E-02   | 17.223768 |
| 0.142970061 | -4.85E-02   | 17.925421 |
| 0.159538361 | -5.42E-02   | 18.542933 |
| 0.177763492 | -6.05E-02   | 19.07031  |
| 0.197811135 | -6.75E-02   | 19.504165 |
| 0.219863542 | -7.51E-02   | 19.844979 |
| 0.244121191 | -8.35E-02   | 20.097973 |
| 0.270804604 | -9.27E-02   | 20.27323  |
| 0.300156358 | -0.10290882 | 20.384813 |
| 0.332443288 | -0.1140874  | 20.448925 |
| 0.367958911 | -0.12638384 | 20.481573 |
| 0.407026096 | -0.13990993 | 20.496536 |
| 0.45        | -0.15478862 | 20.5      |
| 4.94E-02    | -7.82E-03   | 9.306391  |
| 5.64E-02    | -8.97E-03   | 10.439651 |
| 6.41E-02    | -1.02E-02   | 11.525272 |
| 7.25E-02    | -0.01162943 | 12.565385 |
| 8.18E-02    | -1.32E-02   | 13.560115 |

|             |             |           |
|-------------|-------------|-----------|
| 0.092087136 | -1.48E-02   | 14.507696 |
| 0.103352005 | -1.67E-02   | 15.404569 |
| 0.115743362 | -1.87E-02   | 16.245541 |
| 0.129373854 | -2.10E-02   | 17.024063 |
| 0.144367396 | -2.34E-02   | 17.732695 |
| 0.160860291 | -2.62E-02   | 18.36383  |
| 0.179002477 | -2.91E-02   | 18.910677 |
| 0.19895888  | -3.24E-02   | 19.368479 |
| 0.220910924 | -3.60E-02   | 19.73578  |
| 0.245058173 | -4.00E-02   | 20.015492 |
| 0.271620146 | -0.04437167 | 20.21537  |
| 0.300838317 | -4.92E-02   | 20.347607 |
| 0.332978305 | -5.45E-02   | 20.427419 |
| 0.368332291 | -6.03E-02   | 20.470991 |
| 0.407221676 | -6.67E-02   | 20.493641 |
| 0.45        | -7.37E-02   | 20.5      |
| 1           | 2           | 22        |
| 2           | 23          | 22        |
| 2           | 3           | 23        |
| 3           | 24          | 23        |
| 3           | 4           | 24        |
| 4           | 25          | 24        |
| 4           | 5           | 25        |
| 5           | 26          | 25        |
| 5           | 6           | 26        |
| 6           | 27          | 26        |

|    |    |    |
|----|----|----|
| 6  | 7  | 27 |
| 7  | 28 | 27 |
| 7  | 8  | 28 |
| 8  | 29 | 28 |
| 8  | 9  | 29 |
| 9  | 30 | 29 |
| 9  | 10 | 30 |
| 10 | 31 | 30 |
| 10 | 11 | 31 |
| 11 | 32 | 31 |
| 11 | 12 | 32 |
| 12 | 33 | 32 |
| 12 | 13 | 33 |
| 13 | 34 | 33 |
| 13 | 14 | 34 |
| 14 | 35 | 34 |
| 14 | 15 | 35 |
| 15 | 36 | 35 |
| 15 | 16 | 36 |
| 16 | 37 | 36 |
| 16 | 17 | 37 |
| 17 | 38 | 37 |
| 17 | 18 | 38 |
| 18 | 39 | 38 |
| 18 | 19 | 39 |
| 19 | 40 | 39 |

|    |    |    |
|----|----|----|
| 19 | 20 | 40 |
| 20 | 41 | 40 |
| 20 | 21 | 41 |
| 21 | 42 | 41 |
| 22 | 23 | 43 |
| 23 | 44 | 43 |
| 23 | 24 | 44 |
| 24 | 45 | 44 |
| 24 | 25 | 45 |
| 25 | 46 | 45 |
| 25 | 26 | 46 |
| 26 | 47 | 46 |
| 26 | 27 | 47 |
| 27 | 48 | 47 |
| 27 | 28 | 48 |
| 28 | 49 | 48 |
| 28 | 29 | 49 |
| 29 | 50 | 49 |
| 29 | 30 | 50 |
| 30 | 51 | 50 |
| 30 | 31 | 51 |
| 31 | 52 | 51 |
| 31 | 32 | 52 |
| 32 | 53 | 52 |
| 32 | 33 | 53 |
| 33 | 54 | 53 |

|    |    |    |
|----|----|----|
| 33 | 34 | 54 |
| 34 | 55 | 54 |
| 34 | 35 | 55 |
| 35 | 56 | 55 |
| 35 | 36 | 56 |
| 36 | 57 | 56 |
| 36 | 37 | 57 |
| 37 | 58 | 57 |
| 37 | 38 | 58 |
| 38 | 59 | 58 |
| 38 | 39 | 59 |
| 39 | 60 | 59 |
| 39 | 40 | 60 |
| 40 | 61 | 60 |
| 40 | 41 | 61 |
| 41 | 62 | 61 |
| 41 | 42 | 62 |
| 42 | 63 | 62 |
| 43 | 44 | 64 |
| 44 | 65 | 64 |
| 44 | 45 | 65 |
| 45 | 66 | 65 |
| 45 | 46 | 66 |
| 46 | 67 | 66 |
| 46 | 47 | 67 |
| 47 | 68 | 67 |



|    |    |    |
|----|----|----|
| 47 | 48 | 68 |
| 48 | 69 | 68 |
| 48 | 49 | 69 |
| 49 | 70 | 69 |
| 49 | 50 | 70 |
| 50 | 71 | 70 |
| 50 | 51 | 71 |
| 51 | 72 | 71 |
| 51 | 52 | 72 |
| 52 | 73 | 72 |
| 52 | 53 | 73 |
| 53 | 74 | 73 |
| 53 | 54 | 74 |
| 54 | 75 | 74 |
| 54 | 55 | 75 |
| 55 | 76 | 75 |
| 55 | 56 | 76 |
| 56 | 77 | 76 |
| 56 | 57 | 77 |
| 57 | 78 | 77 |
| 57 | 58 | 78 |
| 58 | 79 | 78 |
| 58 | 59 | 79 |
| 59 | 80 | 79 |
| 59 | 60 | 80 |
| 60 | 81 | 80 |

|    |    |    |
|----|----|----|
| 60 | 61 | 81 |
| 61 | 82 | 81 |
| 61 | 62 | 82 |
| 62 | 83 | 82 |
| 62 | 63 | 83 |
| 63 | 84 | 83 |
| 64 | 65 | 85 |
| 65 | 86 | 85 |
| 65 | 66 | 86 |
| 66 | 87 | 86 |
| 66 | 67 | 87 |
| 67 | 88 | 87 |
| 67 | 68 | 88 |
| 68 | 89 | 88 |
| 68 | 69 | 89 |
| 69 | 90 | 89 |
| 69 | 70 | 90 |
| 70 | 91 | 90 |
| 70 | 71 | 91 |
| 71 | 92 | 91 |
| 71 | 72 | 92 |
| 72 | 93 | 92 |
| 72 | 73 | 93 |
| 73 | 94 | 93 |
| 73 | 74 | 94 |
| 74 | 95 | 94 |

|    |     |     |
|----|-----|-----|
| 74 | 75  | 95  |
| 75 | 96  | 95  |
| 75 | 76  | 96  |
| 76 | 97  | 96  |
| 76 | 77  | 97  |
| 77 | 98  | 97  |
| 77 | 78  | 98  |
| 78 | 99  | 98  |
| 78 | 79  | 99  |
| 79 | 100 | 99  |
| 79 | 80  | 100 |
| 80 | 101 | 100 |
| 80 | 81  | 101 |
| 81 | 102 | 101 |
| 81 | 82  | 102 |
| 82 | 103 | 102 |
| 82 | 83  | 103 |
| 83 | 104 | 103 |
| 83 | 84  | 104 |
| 84 | 105 | 104 |
| 85 | 86  | 106 |
| 86 | 107 | 106 |
| 86 | 87  | 107 |
| 87 | 108 | 107 |
| 87 | 88  | 108 |
| 88 | 109 | 108 |

|     |     |     |
|-----|-----|-----|
| 88  | 89  | 109 |
| 89  | 110 | 109 |
| 89  | 90  | 110 |
| 90  | 111 | 110 |
| 90  | 91  | 111 |
| 91  | 112 | 111 |
| 91  | 92  | 112 |
| 92  | 113 | 112 |
| 92  | 93  | 113 |
| 93  | 114 | 113 |
| 93  | 94  | 114 |
| 94  | 115 | 114 |
| 94  | 95  | 115 |
| 95  | 116 | 115 |
| 95  | 96  | 116 |
| 96  | 117 | 116 |
| 96  | 97  | 117 |
| 97  | 118 | 117 |
| 97  | 98  | 118 |
| 98  | 119 | 118 |
| 98  | 99  | 119 |
| 99  | 120 | 119 |
| 99  | 100 | 120 |
| 100 | 121 | 120 |
| 100 | 101 | 121 |
| 101 | 122 | 121 |

|     |     |     |
|-----|-----|-----|
| 101 | 102 | 122 |
| 102 | 123 | 122 |
| 102 | 103 | 123 |
| 103 | 124 | 123 |
| 103 | 104 | 124 |
| 104 | 125 | 124 |
| 104 | 105 | 125 |
| 105 | 126 | 125 |
| 106 | 107 | 127 |
| 107 | 128 | 127 |
| 107 | 108 | 128 |
| 108 | 129 | 128 |
| 108 | 109 | 129 |
| 109 | 130 | 129 |
| 109 | 110 | 130 |
| 110 | 131 | 130 |
| 110 | 111 | 131 |
| 111 | 132 | 131 |
| 111 | 112 | 132 |
| 112 | 133 | 132 |
| 112 | 113 | 133 |
| 113 | 134 | 133 |
| 113 | 114 | 134 |
| 114 | 135 | 134 |
| 114 | 115 | 135 |
| 115 | 136 | 135 |

|     |     |     |
|-----|-----|-----|
| 115 | 116 | 136 |
| 116 | 137 | 136 |
| 116 | 117 | 137 |
| 117 | 138 | 137 |
| 117 | 118 | 138 |
| 118 | 139 | 138 |
| 118 | 119 | 139 |
| 119 | 140 | 139 |
| 119 | 120 | 140 |
| 120 | 141 | 140 |
| 120 | 121 | 141 |
| 121 | 142 | 141 |
| 121 | 122 | 142 |
| 122 | 143 | 142 |
| 122 | 123 | 143 |
| 123 | 144 | 143 |
| 123 | 124 | 144 |
| 124 | 145 | 144 |
| 124 | 125 | 145 |
| 125 | 146 | 145 |
| 125 | 126 | 146 |
| 126 | 147 | 146 |
| 127 | 128 | 148 |
| 128 | 149 | 148 |
| 128 | 129 | 149 |
| 129 | 150 | 149 |

|     |     |     |
|-----|-----|-----|
| 129 | 130 | 150 |
| 130 | 151 | 150 |
| 130 | 131 | 151 |
| 131 | 152 | 151 |
| 131 | 132 | 152 |
| 132 | 153 | 152 |
| 132 | 133 | 153 |
| 133 | 154 | 153 |
| 133 | 134 | 154 |
| 134 | 155 | 154 |
| 134 | 135 | 155 |
| 135 | 156 | 155 |
| 135 | 136 | 156 |
| 136 | 157 | 156 |
| 136 | 137 | 157 |
| 137 | 158 | 157 |
| 137 | 138 | 158 |
| 138 | 159 | 158 |
| 138 | 139 | 159 |
| 139 | 160 | 159 |
| 139 | 140 | 160 |
| 140 | 161 | 160 |
| 140 | 141 | 161 |
| 141 | 162 | 161 |
| 141 | 142 | 162 |
| 142 | 163 | 162 |

|     |     |     |
|-----|-----|-----|
| 142 | 143 | 163 |
| 143 | 164 | 163 |
| 143 | 144 | 164 |
| 144 | 165 | 164 |
| 144 | 145 | 165 |
| 145 | 166 | 165 |
| 145 | 146 | 166 |
| 146 | 167 | 166 |
| 146 | 147 | 167 |
| 147 | 168 | 167 |
| 148 | 149 | 169 |
| 149 | 170 | 169 |
| 149 | 150 | 170 |
| 150 | 171 | 170 |
| 150 | 151 | 171 |
| 151 | 172 | 171 |
| 151 | 152 | 172 |
| 152 | 173 | 172 |
| 152 | 153 | 173 |
| 153 | 174 | 173 |
| 153 | 154 | 174 |
| 154 | 175 | 174 |
| 154 | 155 | 175 |
| 155 | 176 | 175 |
| 155 | 156 | 176 |
| 156 | 177 | 176 |



|     |     |     |
|-----|-----|-----|
| 156 | 157 | 177 |
| 157 | 178 | 177 |
| 157 | 158 | 178 |
| 158 | 179 | 178 |
| 158 | 159 | 179 |
| 159 | 180 | 179 |
| 159 | 160 | 180 |
| 160 | 181 | 180 |
| 160 | 161 | 181 |
| 161 | 182 | 181 |
| 161 | 162 | 182 |
| 162 | 183 | 182 |
| 162 | 163 | 183 |
| 163 | 184 | 183 |
| 163 | 164 | 184 |
| 164 | 185 | 184 |
| 164 | 165 | 185 |
| 165 | 186 | 185 |
| 165 | 166 | 186 |
| 166 | 187 | 186 |
| 166 | 167 | 187 |
| 167 | 188 | 187 |
| 167 | 168 | 188 |
| 168 | 189 | 188 |
| 169 | 170 | 190 |
| 170 | 191 | 190 |

|     |     |     |
|-----|-----|-----|
| 170 | 171 | 191 |
| 171 | 192 | 191 |
| 171 | 172 | 192 |
| 172 | 193 | 192 |
| 172 | 173 | 193 |
| 173 | 194 | 193 |
| 173 | 174 | 194 |
| 174 | 195 | 194 |
| 174 | 175 | 195 |
| 175 | 196 | 195 |
| 175 | 176 | 196 |
| 176 | 197 | 196 |
| 176 | 177 | 197 |
| 177 | 198 | 197 |
| 177 | 178 | 198 |
| 178 | 199 | 198 |
| 178 | 179 | 199 |
| 179 | 200 | 199 |
| 179 | 180 | 200 |
| 180 | 201 | 200 |
| 180 | 181 | 201 |
| 181 | 202 | 201 |
| 181 | 182 | 202 |
| 182 | 203 | 202 |
| 182 | 183 | 203 |
| 183 | 204 | 203 |

|     |     |     |
|-----|-----|-----|
| 183 | 184 | 204 |
| 184 | 205 | 204 |
| 184 | 185 | 205 |
| 185 | 206 | 205 |
| 185 | 186 | 206 |
| 186 | 207 | 206 |
| 186 | 187 | 207 |
| 187 | 208 | 207 |
| 187 | 188 | 208 |
| 188 | 209 | 208 |
| 188 | 189 | 209 |
| 189 | 210 | 209 |
| 190 | 191 | 211 |
| 191 | 212 | 211 |
| 191 | 192 | 212 |
| 192 | 213 | 212 |
| 192 | 193 | 213 |
| 193 | 214 | 213 |
| 193 | 194 | 214 |
| 194 | 215 | 214 |
| 194 | 195 | 215 |
| 195 | 216 | 215 |
| 195 | 196 | 216 |
| 196 | 217 | 216 |
| 196 | 197 | 217 |
| 197 | 218 | 217 |

|     |     |     |
|-----|-----|-----|
| 197 | 198 | 218 |
| 198 | 219 | 218 |
| 198 | 199 | 219 |
| 199 | 220 | 219 |
| 199 | 200 | 220 |
| 200 | 221 | 220 |
| 200 | 201 | 221 |
| 201 | 222 | 221 |
| 201 | 202 | 222 |
| 202 | 223 | 222 |
| 202 | 203 | 223 |
| 203 | 224 | 223 |
| 203 | 204 | 224 |
| 204 | 225 | 224 |
| 204 | 205 | 225 |
| 205 | 226 | 225 |
| 205 | 206 | 226 |
| 206 | 227 | 226 |
| 206 | 207 | 227 |
| 207 | 228 | 227 |
| 207 | 208 | 228 |
| 208 | 229 | 228 |
| 208 | 209 | 229 |
| 209 | 230 | 229 |
| 209 | 210 | 230 |
| 210 | 231 | 230 |

|     |     |     |
|-----|-----|-----|
| 211 | 212 | 232 |
| 212 | 233 | 232 |
| 212 | 213 | 233 |
| 213 | 234 | 233 |
| 213 | 214 | 234 |
| 214 | 235 | 234 |
| 214 | 215 | 235 |
| 215 | 236 | 235 |
| 215 | 216 | 236 |
| 216 | 237 | 236 |
| 216 | 217 | 237 |
| 217 | 238 | 237 |
| 217 | 218 | 238 |
| 218 | 239 | 238 |
| 218 | 219 | 239 |
| 219 | 240 | 239 |
| 219 | 220 | 240 |
| 220 | 241 | 240 |
| 220 | 221 | 241 |
| 221 | 242 | 241 |
| 221 | 222 | 242 |
| 222 | 243 | 242 |
| 222 | 223 | 243 |
| 223 | 244 | 243 |
| 223 | 224 | 244 |
| 224 | 245 | 244 |

|     |     |     |
|-----|-----|-----|
| 224 | 225 | 245 |
| 225 | 246 | 245 |
| 225 | 226 | 246 |
| 226 | 247 | 246 |
| 226 | 227 | 247 |
| 227 | 248 | 247 |
| 227 | 228 | 248 |
| 228 | 249 | 248 |
| 228 | 229 | 249 |
| 229 | 250 | 249 |
| 229 | 230 | 250 |
| 230 | 251 | 250 |
| 230 | 231 | 251 |
| 231 | 252 | 251 |
| 232 | 233 | 253 |
| 233 | 254 | 253 |
| 233 | 234 | 254 |
| 234 | 255 | 254 |
| 234 | 235 | 255 |
| 235 | 256 | 255 |
| 235 | 236 | 256 |
| 236 | 257 | 256 |
| 236 | 237 | 257 |
| 237 | 258 | 257 |
| 237 | 238 | 258 |
| 238 | 259 | 258 |

|     |     |     |
|-----|-----|-----|
| 238 | 239 | 259 |
| 239 | 260 | 259 |
| 239 | 240 | 260 |
| 240 | 261 | 260 |
| 240 | 241 | 261 |
| 241 | 262 | 261 |
| 241 | 242 | 262 |
| 242 | 263 | 262 |
| 242 | 243 | 263 |
| 243 | 264 | 263 |
| 243 | 244 | 264 |
| 244 | 265 | 264 |
| 244 | 245 | 265 |
| 245 | 266 | 265 |
| 245 | 246 | 266 |
| 246 | 267 | 266 |
| 246 | 247 | 267 |
| 247 | 268 | 267 |
| 247 | 248 | 268 |
| 248 | 269 | 268 |
| 248 | 249 | 269 |
| 249 | 270 | 269 |
| 249 | 250 | 270 |
| 250 | 271 | 270 |
| 250 | 251 | 271 |
| 251 | 272 | 271 |

|     |     |     |
|-----|-----|-----|
| 251 | 252 | 272 |
| 252 | 273 | 272 |
| 253 | 254 | 274 |
| 254 | 275 | 274 |
| 254 | 255 | 275 |
| 255 | 276 | 275 |
| 255 | 256 | 276 |
| 256 | 277 | 276 |
| 256 | 257 | 277 |
| 257 | 278 | 277 |
| 257 | 258 | 278 |
| 258 | 279 | 278 |
| 258 | 259 | 279 |
| 259 | 280 | 279 |
| 259 | 260 | 280 |
| 260 | 281 | 280 |
| 260 | 261 | 281 |
| 261 | 282 | 281 |
| 261 | 262 | 282 |
| 262 | 283 | 282 |
| 262 | 263 | 283 |
| 263 | 284 | 283 |
| 263 | 264 | 284 |
| 264 | 285 | 284 |
| 264 | 265 | 285 |
| 265 | 286 | 285 |



|     |     |     |
|-----|-----|-----|
| 265 | 266 | 286 |
| 266 | 287 | 286 |
| 266 | 267 | 287 |
| 267 | 288 | 287 |
| 267 | 268 | 288 |
| 268 | 289 | 288 |
| 268 | 269 | 289 |
| 269 | 290 | 289 |
| 269 | 270 | 290 |
| 270 | 291 | 290 |
| 270 | 271 | 291 |
| 271 | 292 | 291 |
| 271 | 272 | 292 |
| 272 | 293 | 292 |
| 272 | 273 | 293 |
| 273 | 294 | 293 |
| 274 | 275 | 295 |
| 275 | 296 | 295 |
| 275 | 276 | 296 |
| 276 | 297 | 296 |
| 276 | 277 | 297 |
| 277 | 298 | 297 |
| 277 | 278 | 298 |
| 278 | 299 | 298 |
| 278 | 279 | 299 |
| 279 | 300 | 299 |

|     |     |     |
|-----|-----|-----|
| 279 | 280 | 300 |
| 280 | 301 | 300 |
| 280 | 281 | 301 |
| 281 | 302 | 301 |
| 281 | 282 | 302 |
| 282 | 303 | 302 |
| 282 | 283 | 303 |
| 283 | 304 | 303 |
| 283 | 284 | 304 |
| 284 | 305 | 304 |
| 284 | 285 | 305 |
| 285 | 306 | 305 |
| 285 | 286 | 306 |
| 286 | 307 | 306 |
| 286 | 287 | 307 |
| 287 | 308 | 307 |
| 287 | 288 | 308 |
| 288 | 309 | 308 |
| 288 | 289 | 309 |
| 289 | 310 | 309 |
| 289 | 290 | 310 |
| 290 | 311 | 310 |
| 290 | 291 | 311 |
| 291 | 312 | 311 |
| 291 | 292 | 312 |
| 292 | 313 | 312 |

|     |     |     |
|-----|-----|-----|
| 292 | 293 | 313 |
| 293 | 314 | 313 |
| 293 | 294 | 314 |
| 294 | 315 | 314 |
| 295 | 296 | 316 |
| 296 | 317 | 316 |
| 296 | 297 | 317 |
| 297 | 318 | 317 |
| 297 | 298 | 318 |
| 298 | 319 | 318 |
| 298 | 299 | 319 |
| 299 | 320 | 319 |
| 299 | 300 | 320 |
| 300 | 321 | 320 |
| 300 | 301 | 321 |
| 301 | 322 | 321 |
| 301 | 302 | 322 |
| 302 | 323 | 322 |
| 302 | 303 | 323 |
| 303 | 324 | 323 |
| 303 | 304 | 324 |
| 304 | 325 | 324 |
| 304 | 305 | 325 |
| 305 | 326 | 325 |
| 305 | 306 | 326 |
| 306 | 327 | 326 |

|     |     |     |
|-----|-----|-----|
| 306 | 307 | 327 |
| 307 | 328 | 327 |
| 307 | 308 | 328 |
| 308 | 329 | 328 |
| 308 | 309 | 329 |
| 309 | 330 | 329 |
| 309 | 310 | 330 |
| 310 | 331 | 330 |
| 310 | 311 | 331 |
| 311 | 332 | 331 |
| 311 | 312 | 332 |
| 312 | 333 | 332 |
| 312 | 313 | 333 |
| 313 | 334 | 333 |
| 313 | 314 | 334 |
| 314 | 335 | 334 |
| 314 | 315 | 335 |
| 315 | 336 | 335 |
| 316 | 317 | 337 |
| 317 | 338 | 337 |
| 317 | 318 | 338 |
| 318 | 339 | 338 |
| 318 | 319 | 339 |
| 319 | 340 | 339 |
| 319 | 320 | 340 |
| 320 | 341 | 340 |

|     |     |     |
|-----|-----|-----|
| 320 | 321 | 341 |
| 321 | 342 | 341 |
| 321 | 322 | 342 |
| 322 | 343 | 342 |
| 322 | 323 | 343 |
| 323 | 344 | 343 |
| 323 | 324 | 344 |
| 324 | 345 | 344 |
| 324 | 325 | 345 |
| 325 | 346 | 345 |
| 325 | 326 | 346 |
| 326 | 347 | 346 |
| 326 | 327 | 347 |
| 327 | 348 | 347 |
| 327 | 328 | 348 |
| 328 | 349 | 348 |
| 328 | 329 | 349 |
| 329 | 350 | 349 |
| 329 | 330 | 350 |
| 330 | 351 | 350 |
| 330 | 331 | 351 |
| 331 | 352 | 351 |
| 331 | 332 | 352 |
| 332 | 353 | 352 |
| 332 | 333 | 353 |
| 333 | 354 | 353 |

|     |     |     |
|-----|-----|-----|
| 333 | 334 | 354 |
| 334 | 355 | 354 |
| 334 | 335 | 355 |
| 335 | 356 | 355 |
| 335 | 336 | 356 |
| 336 | 357 | 356 |
| 337 | 338 | 358 |
| 338 | 359 | 358 |
| 338 | 339 | 359 |
| 339 | 360 | 359 |
| 339 | 340 | 360 |
| 340 | 361 | 360 |
| 340 | 341 | 361 |
| 341 | 362 | 361 |
| 341 | 342 | 362 |
| 342 | 363 | 362 |
| 342 | 343 | 363 |
| 343 | 364 | 363 |
| 343 | 344 | 364 |
| 344 | 365 | 364 |
| 344 | 345 | 365 |
| 345 | 366 | 365 |
| 345 | 346 | 366 |
| 346 | 367 | 366 |
| 346 | 347 | 367 |
| 347 | 368 | 367 |

|     |     |     |
|-----|-----|-----|
| 347 | 348 | 368 |
| 348 | 369 | 368 |
| 348 | 349 | 369 |
| 349 | 370 | 369 |
| 349 | 350 | 370 |
| 350 | 371 | 370 |
| 350 | 351 | 371 |
| 351 | 372 | 371 |
| 351 | 352 | 372 |
| 352 | 373 | 372 |
| 352 | 353 | 373 |
| 353 | 374 | 373 |
| 353 | 354 | 374 |
| 354 | 375 | 374 |
| 354 | 355 | 375 |
| 355 | 376 | 375 |
| 355 | 356 | 376 |
| 356 | 377 | 376 |
| 356 | 357 | 377 |
| 357 | 378 | 377 |
| 358 | 359 | 379 |
| 359 | 380 | 379 |
| 359 | 360 | 380 |
| 360 | 381 | 380 |
| 360 | 361 | 381 |
| 361 | 382 | 381 |

|     |     |     |
|-----|-----|-----|
| 361 | 362 | 382 |
| 362 | 383 | 382 |
| 362 | 363 | 383 |
| 363 | 384 | 383 |
| 363 | 364 | 384 |
| 364 | 385 | 384 |
| 364 | 365 | 385 |
| 365 | 386 | 385 |
| 365 | 366 | 386 |
| 366 | 387 | 386 |
| 366 | 367 | 387 |
| 367 | 388 | 387 |
| 367 | 368 | 388 |
| 368 | 389 | 388 |
| 368 | 369 | 389 |
| 369 | 390 | 389 |
| 369 | 370 | 390 |
| 370 | 391 | 390 |
| 370 | 371 | 391 |
| 371 | 392 | 391 |
| 371 | 372 | 392 |
| 372 | 393 | 392 |
| 372 | 373 | 393 |
| 373 | 394 | 393 |
| 373 | 374 | 394 |
| 374 | 395 | 394 |



|     |     |     |
|-----|-----|-----|
| 374 | 375 | 395 |
| 375 | 396 | 395 |
| 375 | 376 | 396 |
| 376 | 397 | 396 |
| 376 | 377 | 397 |
| 377 | 398 | 397 |
| 377 | 378 | 398 |
| 378 | 399 | 398 |
| 379 | 380 | 400 |
| 380 | 401 | 400 |
| 380 | 381 | 401 |
| 381 | 402 | 401 |
| 381 | 382 | 402 |
| 382 | 403 | 402 |
| 382 | 383 | 403 |
| 383 | 404 | 403 |
| 383 | 384 | 404 |
| 384 | 405 | 404 |
| 384 | 385 | 405 |
| 385 | 406 | 405 |
| 385 | 386 | 406 |
| 386 | 407 | 406 |
| 386 | 387 | 407 |
| 387 | 408 | 407 |
| 387 | 388 | 408 |
| 388 | 409 | 408 |

|     |     |     |
|-----|-----|-----|
| 388 | 389 | 409 |
| 389 | 410 | 409 |
| 389 | 390 | 410 |
| 390 | 411 | 410 |
| 390 | 391 | 411 |
| 391 | 412 | 411 |
| 391 | 392 | 412 |
| 392 | 413 | 412 |
| 392 | 393 | 413 |
| 393 | 414 | 413 |
| 393 | 394 | 414 |
| 394 | 415 | 414 |
| 394 | 395 | 415 |
| 395 | 416 | 415 |
| 395 | 396 | 416 |
| 396 | 417 | 416 |
| 396 | 397 | 417 |
| 397 | 418 | 417 |
| 397 | 398 | 418 |
| 398 | 419 | 418 |
| 398 | 399 | 419 |
| 399 | 420 | 419 |
| 400 | 401 | 421 |
| 401 | 422 | 421 |
| 401 | 402 | 422 |
| 402 | 423 | 422 |

|     |     |     |
|-----|-----|-----|
| 402 | 403 | 423 |
| 403 | 424 | 423 |
| 403 | 404 | 424 |
| 404 | 425 | 424 |
| 404 | 405 | 425 |
| 405 | 426 | 425 |
| 405 | 406 | 426 |
| 406 | 427 | 426 |
| 406 | 407 | 427 |
| 407 | 428 | 427 |
| 407 | 408 | 428 |
| 408 | 429 | 428 |
| 408 | 409 | 429 |
| 409 | 430 | 429 |
| 409 | 410 | 430 |
| 410 | 431 | 430 |
| 410 | 411 | 431 |
| 411 | 432 | 431 |
| 411 | 412 | 432 |
| 412 | 433 | 432 |
| 412 | 413 | 433 |
| 413 | 434 | 433 |
| 413 | 414 | 434 |
| 414 | 435 | 434 |
| 414 | 415 | 435 |
| 415 | 436 | 435 |

|     |     |     |
|-----|-----|-----|
| 415 | 416 | 436 |
| 416 | 437 | 436 |
| 416 | 417 | 437 |
| 417 | 438 | 437 |
| 417 | 418 | 438 |
| 418 | 439 | 438 |
| 418 | 419 | 439 |
| 419 | 440 | 439 |
| 419 | 420 | 440 |
| 420 | 441 | 440 |
| 421 | 422 | 442 |
| 422 | 443 | 442 |
| 422 | 423 | 443 |
| 423 | 444 | 443 |
| 423 | 424 | 444 |
| 424 | 445 | 444 |
| 424 | 425 | 445 |
| 425 | 446 | 445 |
| 425 | 426 | 446 |
| 426 | 447 | 446 |
| 426 | 427 | 447 |
| 427 | 448 | 447 |
| 427 | 428 | 448 |
| 428 | 449 | 448 |
| 428 | 429 | 449 |
| 429 | 450 | 449 |

|     |     |     |
|-----|-----|-----|
| 429 | 430 | 450 |
| 430 | 451 | 450 |
| 430 | 431 | 451 |
| 431 | 452 | 451 |
| 431 | 432 | 452 |
| 432 | 453 | 452 |
| 432 | 433 | 453 |
| 433 | 454 | 453 |
| 433 | 434 | 454 |
| 434 | 455 | 454 |
| 434 | 435 | 455 |
| 435 | 456 | 455 |
| 435 | 436 | 456 |
| 436 | 457 | 456 |
| 436 | 437 | 457 |
| 437 | 458 | 457 |
| 437 | 438 | 458 |
| 438 | 459 | 458 |
| 438 | 439 | 459 |
| 439 | 460 | 459 |
| 439 | 440 | 460 |
| 440 | 461 | 460 |
| 440 | 441 | 461 |
| 441 | 462 | 461 |
| 442 | 443 | 463 |
| 443 | 464 | 463 |

|     |     |     |
|-----|-----|-----|
| 443 | 444 | 464 |
| 444 | 465 | 464 |
| 444 | 445 | 465 |
| 445 | 466 | 465 |
| 445 | 446 | 466 |
| 446 | 467 | 466 |
| 446 | 447 | 467 |
| 447 | 468 | 467 |
| 447 | 448 | 468 |
| 448 | 469 | 468 |
| 448 | 449 | 469 |
| 449 | 470 | 469 |
| 449 | 450 | 470 |
| 450 | 471 | 470 |
| 450 | 451 | 471 |
| 451 | 472 | 471 |
| 451 | 452 | 472 |
| 452 | 473 | 472 |
| 452 | 453 | 473 |
| 453 | 474 | 473 |
| 453 | 454 | 474 |
| 454 | 475 | 474 |
| 454 | 455 | 475 |
| 455 | 476 | 475 |
| 455 | 456 | 476 |
| 456 | 477 | 476 |

|     |     |     |
|-----|-----|-----|
| 456 | 457 | 477 |
| 457 | 478 | 477 |
| 457 | 458 | 478 |
| 458 | 479 | 478 |
| 458 | 459 | 479 |
| 459 | 480 | 479 |
| 459 | 460 | 480 |
| 460 | 481 | 480 |
| 460 | 461 | 481 |
| 461 | 482 | 481 |
| 461 | 462 | 482 |
| 462 | 483 | 482 |
| 463 | 464 | 484 |
| 464 | 485 | 484 |
| 464 | 465 | 485 |
| 465 | 486 | 485 |
| 465 | 466 | 486 |
| 466 | 487 | 486 |
| 466 | 467 | 487 |
| 467 | 488 | 487 |
| 467 | 468 | 488 |
| 468 | 489 | 488 |
| 468 | 469 | 489 |
| 469 | 490 | 489 |
| 469 | 470 | 490 |
| 470 | 491 | 490 |

|     |     |     |
|-----|-----|-----|
| 470 | 471 | 491 |
| 471 | 492 | 491 |
| 471 | 472 | 492 |
| 472 | 493 | 492 |
| 472 | 473 | 493 |
| 473 | 494 | 493 |
| 473 | 474 | 494 |
| 474 | 495 | 494 |
| 474 | 475 | 495 |
| 475 | 496 | 495 |
| 475 | 476 | 496 |
| 476 | 497 | 496 |
| 476 | 477 | 497 |
| 477 | 498 | 497 |
| 477 | 478 | 498 |
| 478 | 499 | 498 |
| 478 | 479 | 499 |
| 479 | 500 | 499 |
| 479 | 480 | 500 |
| 480 | 501 | 500 |
| 480 | 481 | 501 |
| 481 | 502 | 501 |
| 481 | 482 | 502 |
| 482 | 503 | 502 |
| 482 | 483 | 503 |
| 483 | 504 | 503 |



|     |     |     |
|-----|-----|-----|
| 484 | 485 | 505 |
| 485 | 506 | 505 |
| 485 | 486 | 506 |
| 486 | 507 | 506 |
| 486 | 487 | 507 |
| 487 | 508 | 507 |
| 487 | 488 | 508 |
| 488 | 509 | 508 |
| 488 | 489 | 509 |
| 489 | 510 | 509 |
| 489 | 490 | 510 |
| 490 | 511 | 510 |
| 490 | 491 | 511 |
| 491 | 512 | 511 |
| 491 | 492 | 512 |
| 492 | 513 | 512 |
| 492 | 493 | 513 |
| 493 | 514 | 513 |
| 493 | 494 | 514 |
| 494 | 515 | 514 |
| 494 | 495 | 515 |
| 495 | 516 | 515 |
| 495 | 496 | 516 |
| 496 | 517 | 516 |
| 496 | 497 | 517 |
| 497 | 518 | 517 |

|     |     |     |
|-----|-----|-----|
| 497 | 498 | 518 |
| 498 | 519 | 518 |
| 498 | 499 | 519 |
| 499 | 520 | 519 |
| 499 | 500 | 520 |
| 500 | 521 | 520 |
| 500 | 501 | 521 |
| 501 | 522 | 521 |
| 501 | 502 | 522 |
| 502 | 523 | 522 |
| 502 | 503 | 523 |
| 503 | 524 | 523 |
| 503 | 504 | 524 |
| 504 | 525 | 524 |
| 505 | 506 | 526 |
| 506 | 527 | 526 |
| 506 | 507 | 527 |
| 507 | 528 | 527 |
| 507 | 508 | 528 |
| 508 | 529 | 528 |
| 508 | 509 | 529 |
| 509 | 530 | 529 |
| 509 | 510 | 530 |
| 510 | 531 | 530 |
| 510 | 511 | 531 |
| 511 | 532 | 531 |

|     |     |     |
|-----|-----|-----|
| 511 | 512 | 532 |
| 512 | 533 | 532 |
| 512 | 513 | 533 |
| 513 | 534 | 533 |
| 513 | 514 | 534 |
| 514 | 535 | 534 |
| 514 | 515 | 535 |
| 515 | 536 | 535 |
| 515 | 516 | 536 |
| 516 | 537 | 536 |
| 516 | 517 | 537 |
| 517 | 538 | 537 |
| 517 | 518 | 538 |
| 518 | 539 | 538 |
| 518 | 519 | 539 |
| 519 | 540 | 539 |
| 519 | 520 | 540 |
| 520 | 541 | 540 |
| 520 | 521 | 541 |
| 521 | 542 | 541 |
| 521 | 522 | 542 |
| 522 | 543 | 542 |
| 522 | 523 | 543 |
| 523 | 544 | 543 |
| 523 | 524 | 544 |
| 524 | 545 | 544 |

|     |     |     |
|-----|-----|-----|
| 524 | 525 | 545 |
| 525 | 546 | 545 |
| 526 | 527 | 547 |
| 527 | 548 | 547 |
| 527 | 528 | 548 |
| 528 | 549 | 548 |
| 528 | 529 | 549 |
| 529 | 550 | 549 |
| 529 | 530 | 550 |
| 530 | 551 | 550 |
| 530 | 531 | 551 |
| 531 | 552 | 551 |
| 531 | 532 | 552 |
| 532 | 553 | 552 |
| 532 | 533 | 553 |
| 533 | 554 | 553 |
| 533 | 534 | 554 |
| 534 | 555 | 554 |
| 534 | 535 | 555 |
| 535 | 556 | 555 |
| 535 | 536 | 556 |
| 536 | 557 | 556 |
| 536 | 537 | 557 |
| 537 | 558 | 557 |
| 537 | 538 | 558 |
| 538 | 559 | 558 |

|     |     |     |
|-----|-----|-----|
| 538 | 539 | 559 |
| 539 | 560 | 559 |
| 539 | 540 | 560 |
| 540 | 561 | 560 |
| 540 | 541 | 561 |
| 541 | 562 | 561 |
| 541 | 542 | 562 |
| 542 | 563 | 562 |
| 542 | 543 | 563 |
| 543 | 564 | 563 |
| 543 | 544 | 564 |
| 544 | 565 | 564 |
| 544 | 545 | 565 |
| 545 | 566 | 565 |
| 545 | 546 | 566 |
| 546 | 567 | 566 |
| 547 | 548 | 568 |
| 548 | 569 | 568 |
| 548 | 549 | 569 |
| 549 | 570 | 569 |
| 549 | 550 | 570 |
| 550 | 571 | 570 |
| 550 | 551 | 571 |
| 551 | 572 | 571 |
| 551 | 552 | 572 |
| 552 | 573 | 572 |

|     |     |     |
|-----|-----|-----|
| 552 | 553 | 573 |
| 553 | 574 | 573 |
| 553 | 554 | 574 |
| 554 | 575 | 574 |
| 554 | 555 | 575 |
| 555 | 576 | 575 |
| 555 | 556 | 576 |
| 556 | 577 | 576 |
| 556 | 557 | 577 |
| 557 | 578 | 577 |
| 557 | 558 | 578 |
| 558 | 579 | 578 |
| 558 | 559 | 579 |
| 559 | 580 | 579 |
| 559 | 560 | 580 |
| 560 | 581 | 580 |
| 560 | 561 | 581 |
| 561 | 582 | 581 |
| 561 | 562 | 582 |
| 562 | 583 | 582 |
| 562 | 563 | 583 |
| 563 | 584 | 583 |
| 563 | 564 | 584 |
| 564 | 585 | 584 |
| 564 | 565 | 585 |
| 565 | 586 | 585 |

|     |     |     |
|-----|-----|-----|
| 565 | 566 | 586 |
| 566 | 587 | 586 |
| 566 | 567 | 587 |
| 567 | 588 | 587 |
| 568 | 569 | 589 |
| 569 | 590 | 589 |
| 569 | 570 | 590 |
| 570 | 591 | 590 |
| 570 | 571 | 591 |
| 571 | 592 | 591 |
| 571 | 572 | 592 |
| 572 | 593 | 592 |
| 572 | 573 | 593 |
| 573 | 594 | 593 |
| 573 | 574 | 594 |
| 574 | 595 | 594 |
| 574 | 575 | 595 |
| 575 | 596 | 595 |
| 575 | 576 | 596 |
| 576 | 597 | 596 |
| 576 | 577 | 597 |
| 577 | 598 | 597 |
| 577 | 578 | 598 |
| 578 | 599 | 598 |
| 578 | 579 | 599 |
| 579 | 600 | 599 |

|     |     |     |
|-----|-----|-----|
| 579 | 580 | 600 |
| 580 | 601 | 600 |
| 580 | 581 | 601 |
| 581 | 602 | 601 |
| 581 | 582 | 602 |
| 582 | 603 | 602 |
| 582 | 583 | 603 |
| 583 | 604 | 603 |
| 583 | 584 | 604 |
| 584 | 605 | 604 |
| 584 | 585 | 605 |
| 585 | 606 | 605 |
| 585 | 586 | 606 |
| 586 | 607 | 606 |
| 586 | 587 | 607 |
| 587 | 608 | 607 |
| 587 | 588 | 608 |
| 588 | 609 | 608 |
| 589 | 590 | 610 |
| 590 | 611 | 610 |
| 590 | 591 | 611 |
| 591 | 612 | 611 |
| 591 | 592 | 612 |
| 592 | 613 | 612 |
| 592 | 593 | 613 |
| 593 | 614 | 613 |



|     |     |     |
|-----|-----|-----|
| 593 | 594 | 614 |
| 594 | 615 | 614 |
| 594 | 595 | 615 |
| 595 | 616 | 615 |
| 595 | 596 | 616 |
| 596 | 617 | 616 |
| 596 | 597 | 617 |
| 597 | 618 | 617 |
| 597 | 598 | 618 |
| 598 | 619 | 618 |
| 598 | 599 | 619 |
| 599 | 620 | 619 |
| 599 | 600 | 620 |
| 600 | 621 | 620 |
| 600 | 601 | 621 |
| 601 | 622 | 621 |
| 601 | 602 | 622 |
| 602 | 623 | 622 |
| 602 | 603 | 623 |
| 603 | 624 | 623 |
| 603 | 604 | 624 |
| 604 | 625 | 624 |
| 604 | 605 | 625 |
| 605 | 626 | 625 |
| 605 | 606 | 626 |
| 606 | 627 | 626 |

|     |     |     |
|-----|-----|-----|
| 606 | 607 | 627 |
| 607 | 628 | 627 |
| 607 | 608 | 628 |
| 608 | 629 | 628 |
| 608 | 609 | 629 |
| 609 | 630 | 629 |
| 610 | 611 | 631 |
| 611 | 632 | 631 |
| 611 | 612 | 632 |
| 612 | 633 | 632 |
| 612 | 613 | 633 |
| 613 | 634 | 633 |
| 613 | 614 | 634 |
| 614 | 635 | 634 |
| 614 | 615 | 635 |
| 615 | 636 | 635 |
| 615 | 616 | 636 |
| 616 | 637 | 636 |
| 616 | 617 | 637 |
| 617 | 638 | 637 |
| 617 | 618 | 638 |
| 618 | 639 | 638 |
| 618 | 619 | 639 |
| 619 | 640 | 639 |
| 619 | 620 | 640 |
| 620 | 641 | 640 |

|     |     |     |
|-----|-----|-----|
| 620 | 621 | 641 |
| 621 | 642 | 641 |
| 621 | 622 | 642 |
| 622 | 643 | 642 |
| 622 | 623 | 643 |
| 623 | 644 | 643 |
| 623 | 624 | 644 |
| 624 | 645 | 644 |
| 624 | 625 | 645 |
| 625 | 646 | 645 |
| 625 | 626 | 646 |
| 626 | 647 | 646 |
| 626 | 627 | 647 |
| 627 | 648 | 647 |
| 627 | 628 | 648 |
| 628 | 649 | 648 |
| 628 | 629 | 649 |
| 629 | 650 | 649 |
| 629 | 630 | 650 |
| 630 | 651 | 650 |
| 631 | 632 | 652 |
| 632 | 653 | 652 |
| 632 | 633 | 653 |
| 633 | 654 | 653 |
| 633 | 634 | 654 |
| 634 | 655 | 654 |

|     |     |     |
|-----|-----|-----|
| 634 | 635 | 655 |
| 635 | 656 | 655 |
| 635 | 636 | 656 |
| 636 | 657 | 656 |
| 636 | 637 | 657 |
| 637 | 658 | 657 |
| 637 | 638 | 658 |
| 638 | 659 | 658 |
| 638 | 639 | 659 |
| 639 | 660 | 659 |
| 639 | 640 | 660 |
| 640 | 661 | 660 |
| 640 | 641 | 661 |
| 641 | 662 | 661 |
| 641 | 642 | 662 |
| 642 | 663 | 662 |
| 642 | 643 | 663 |
| 643 | 664 | 663 |
| 643 | 644 | 664 |
| 644 | 665 | 664 |
| 644 | 645 | 665 |
| 645 | 666 | 665 |
| 645 | 646 | 666 |
| 646 | 667 | 666 |
| 646 | 647 | 667 |
| 647 | 668 | 667 |

|     |     |     |
|-----|-----|-----|
| 647 | 648 | 668 |
| 648 | 669 | 668 |
| 648 | 649 | 669 |
| 649 | 670 | 669 |
| 649 | 650 | 670 |
| 650 | 671 | 670 |
| 650 | 651 | 671 |
| 651 | 672 | 671 |
| 652 | 653 | 673 |
| 653 | 674 | 673 |
| 653 | 654 | 674 |
| 654 | 675 | 674 |
| 654 | 655 | 675 |
| 655 | 676 | 675 |
| 655 | 656 | 676 |
| 656 | 677 | 676 |
| 656 | 657 | 677 |
| 657 | 678 | 677 |
| 657 | 658 | 678 |
| 658 | 679 | 678 |
| 658 | 659 | 679 |
| 659 | 680 | 679 |
| 659 | 660 | 680 |
| 660 | 681 | 680 |
| 660 | 661 | 681 |
| 661 | 682 | 681 |

|     |     |     |
|-----|-----|-----|
| 661 | 662 | 682 |
| 662 | 683 | 682 |
| 662 | 663 | 683 |
| 663 | 684 | 683 |
| 663 | 664 | 684 |
| 664 | 685 | 684 |
| 664 | 665 | 685 |
| 665 | 686 | 685 |
| 665 | 666 | 686 |
| 666 | 687 | 686 |
| 666 | 667 | 687 |
| 667 | 688 | 687 |
| 667 | 668 | 688 |
| 668 | 689 | 688 |
| 668 | 669 | 689 |
| 669 | 690 | 689 |
| 669 | 670 | 690 |
| 670 | 691 | 690 |
| 670 | 671 | 691 |
| 671 | 692 | 691 |
| 671 | 672 | 692 |
| 672 | 693 | 692 |
| 673 | 674 | 694 |
| 674 | 695 | 694 |
| 674 | 675 | 695 |
| 675 | 696 | 695 |

|     |     |     |
|-----|-----|-----|
| 675 | 676 | 696 |
| 676 | 697 | 696 |
| 676 | 677 | 697 |
| 677 | 698 | 697 |
| 677 | 678 | 698 |
| 678 | 699 | 698 |
| 678 | 679 | 699 |
| 679 | 700 | 699 |
| 679 | 680 | 700 |
| 680 | 701 | 700 |
| 680 | 681 | 701 |
| 681 | 702 | 701 |
| 681 | 682 | 702 |
| 682 | 703 | 702 |
| 682 | 683 | 703 |
| 683 | 704 | 703 |
| 683 | 684 | 704 |
| 684 | 705 | 704 |
| 684 | 685 | 705 |
| 685 | 706 | 705 |
| 685 | 686 | 706 |
| 686 | 707 | 706 |
| 686 | 687 | 707 |
| 687 | 708 | 707 |
| 687 | 688 | 708 |
| 688 | 709 | 708 |

|     |     |     |
|-----|-----|-----|
| 688 | 689 | 709 |
| 689 | 710 | 709 |
| 689 | 690 | 710 |
| 690 | 711 | 710 |
| 690 | 691 | 711 |
| 691 | 712 | 711 |
| 691 | 692 | 712 |
| 692 | 713 | 712 |
| 692 | 693 | 713 |
| 693 | 714 | 713 |
| 694 | 695 | 715 |
| 695 | 716 | 715 |
| 695 | 696 | 716 |
| 696 | 717 | 716 |
| 696 | 697 | 717 |
| 697 | 718 | 717 |
| 697 | 698 | 718 |
| 698 | 719 | 718 |
| 698 | 699 | 719 |
| 699 | 720 | 719 |
| 699 | 700 | 720 |
| 700 | 721 | 720 |
| 700 | 701 | 721 |
| 701 | 722 | 721 |
| 701 | 702 | 722 |
| 702 | 723 | 722 |



|     |     |     |
|-----|-----|-----|
| 702 | 703 | 723 |
| 703 | 724 | 723 |
| 703 | 704 | 724 |
| 704 | 725 | 724 |
| 704 | 705 | 725 |
| 705 | 726 | 725 |
| 705 | 706 | 726 |
| 706 | 727 | 726 |
| 706 | 707 | 727 |
| 707 | 728 | 727 |
| 707 | 708 | 728 |
| 708 | 729 | 728 |
| 708 | 709 | 729 |
| 709 | 730 | 729 |
| 709 | 710 | 730 |
| 710 | 731 | 730 |
| 710 | 711 | 731 |
| 711 | 732 | 731 |
| 711 | 712 | 732 |
| 712 | 733 | 732 |
| 712 | 713 | 733 |
| 713 | 734 | 733 |
| 713 | 714 | 734 |
| 714 | 735 | 734 |
| 715 | 716 | 736 |
| 716 | 737 | 736 |

|     |     |     |
|-----|-----|-----|
| 716 | 717 | 737 |
| 717 | 738 | 737 |
| 717 | 718 | 738 |
| 718 | 739 | 738 |
| 718 | 719 | 739 |
| 719 | 740 | 739 |
| 719 | 720 | 740 |
| 720 | 741 | 740 |
| 720 | 721 | 741 |
| 721 | 742 | 741 |
| 721 | 722 | 742 |
| 722 | 743 | 742 |
| 722 | 723 | 743 |
| 723 | 744 | 743 |
| 723 | 724 | 744 |
| 724 | 745 | 744 |
| 724 | 725 | 745 |
| 725 | 746 | 745 |
| 725 | 726 | 746 |
| 726 | 747 | 746 |
| 726 | 727 | 747 |
| 727 | 748 | 747 |
| 727 | 728 | 748 |
| 728 | 749 | 748 |
| 728 | 729 | 749 |
| 729 | 750 | 749 |

|     |     |     |
|-----|-----|-----|
| 729 | 730 | 750 |
| 730 | 751 | 750 |
| 730 | 731 | 751 |
| 731 | 752 | 751 |
| 731 | 732 | 752 |
| 732 | 753 | 752 |
| 732 | 733 | 753 |
| 733 | 754 | 753 |
| 733 | 734 | 754 |
| 734 | 755 | 754 |
| 734 | 735 | 755 |
| 735 | 756 | 755 |
| 736 | 737 | 757 |
| 737 | 758 | 757 |
| 737 | 738 | 758 |
| 738 | 759 | 758 |
| 738 | 739 | 759 |
| 739 | 760 | 759 |
| 739 | 740 | 760 |
| 740 | 761 | 760 |
| 740 | 741 | 761 |
| 741 | 762 | 761 |
| 741 | 742 | 762 |
| 742 | 763 | 762 |
| 742 | 743 | 763 |
| 743 | 764 | 763 |

|     |     |     |
|-----|-----|-----|
| 743 | 744 | 764 |
| 744 | 765 | 764 |
| 744 | 745 | 765 |
| 745 | 766 | 765 |
| 745 | 746 | 766 |
| 746 | 767 | 766 |
| 746 | 747 | 767 |
| 747 | 768 | 767 |
| 747 | 748 | 768 |
| 748 | 769 | 768 |
| 748 | 749 | 769 |
| 749 | 770 | 769 |
| 749 | 750 | 770 |
| 750 | 771 | 770 |
| 750 | 751 | 771 |
| 751 | 772 | 771 |
| 751 | 752 | 772 |
| 752 | 773 | 772 |
| 752 | 753 | 773 |
| 753 | 774 | 773 |
| 753 | 754 | 774 |
| 754 | 775 | 774 |
| 754 | 755 | 775 |
| 755 | 776 | 775 |
| 755 | 756 | 776 |
| 756 | 777 | 776 |

|     |     |     |
|-----|-----|-----|
| 757 | 758 | 778 |
| 758 | 779 | 778 |
| 758 | 759 | 779 |
| 759 | 780 | 779 |
| 759 | 760 | 780 |
| 760 | 781 | 780 |
| 760 | 761 | 781 |
| 761 | 782 | 781 |
| 761 | 762 | 782 |
| 762 | 783 | 782 |
| 762 | 763 | 783 |
| 763 | 784 | 783 |
| 763 | 764 | 784 |
| 764 | 785 | 784 |
| 764 | 765 | 785 |
| 765 | 786 | 785 |
| 765 | 766 | 786 |
| 766 | 787 | 786 |
| 766 | 767 | 787 |
| 767 | 788 | 787 |
| 767 | 768 | 788 |
| 768 | 789 | 788 |
| 768 | 769 | 789 |
| 769 | 790 | 789 |
| 769 | 770 | 790 |
| 770 | 791 | 790 |

|     |     |     |
|-----|-----|-----|
| 770 | 771 | 791 |
| 771 | 792 | 791 |
| 771 | 772 | 792 |
| 772 | 793 | 792 |
| 772 | 773 | 793 |
| 773 | 794 | 793 |
| 773 | 774 | 794 |
| 774 | 795 | 794 |
| 774 | 775 | 795 |
| 775 | 796 | 795 |
| 775 | 776 | 796 |
| 776 | 797 | 796 |
| 776 | 777 | 797 |
| 777 | 798 | 797 |
| 778 | 779 | 799 |
| 779 | 800 | 799 |
| 779 | 780 | 800 |
| 780 | 801 | 800 |
| 780 | 781 | 801 |
| 781 | 802 | 801 |
| 781 | 782 | 802 |
| 782 | 803 | 802 |
| 782 | 783 | 803 |
| 783 | 804 | 803 |
| 783 | 784 | 804 |
| 784 | 805 | 804 |

|     |     |     |
|-----|-----|-----|
| 784 | 785 | 805 |
| 785 | 806 | 805 |
| 785 | 786 | 806 |
| 786 | 807 | 806 |
| 786 | 787 | 807 |
| 787 | 808 | 807 |
| 787 | 788 | 808 |
| 788 | 809 | 808 |
| 788 | 789 | 809 |
| 789 | 810 | 809 |
| 789 | 790 | 810 |
| 790 | 811 | 810 |
| 790 | 791 | 811 |
| 791 | 812 | 811 |
| 791 | 792 | 812 |
| 792 | 813 | 812 |
| 792 | 793 | 813 |
| 793 | 814 | 813 |
| 793 | 794 | 814 |
| 794 | 815 | 814 |
| 794 | 795 | 815 |
| 795 | 816 | 815 |
| 795 | 796 | 816 |
| 796 | 817 | 816 |
| 796 | 797 | 817 |
| 797 | 818 | 817 |

|     |     |     |
|-----|-----|-----|
| 797 | 798 | 818 |
| 798 | 819 | 818 |
| 799 | 800 | 820 |
| 800 | 821 | 820 |
| 800 | 801 | 821 |
| 801 | 822 | 821 |
| 801 | 802 | 822 |
| 802 | 823 | 822 |
| 802 | 803 | 823 |
| 803 | 824 | 823 |
| 803 | 804 | 824 |
| 804 | 825 | 824 |
| 804 | 805 | 825 |
| 805 | 826 | 825 |
| 805 | 806 | 826 |
| 806 | 827 | 826 |
| 806 | 807 | 827 |
| 807 | 828 | 827 |
| 807 | 808 | 828 |
| 808 | 829 | 828 |
| 808 | 809 | 829 |
| 809 | 830 | 829 |
| 809 | 810 | 830 |
| 810 | 831 | 830 |
| 810 | 811 | 831 |
| 811 | 832 | 831 |



|     |     |     |
|-----|-----|-----|
| 811 | 812 | 832 |
| 812 | 833 | 832 |
| 812 | 813 | 833 |
| 813 | 834 | 833 |
| 813 | 814 | 834 |
| 814 | 835 | 834 |
| 814 | 815 | 835 |
| 815 | 836 | 835 |
| 815 | 816 | 836 |
| 816 | 837 | 836 |
| 816 | 817 | 837 |
| 817 | 838 | 837 |
| 817 | 818 | 838 |
| 818 | 839 | 838 |
| 818 | 819 | 839 |
| 819 | 840 | 839 |
| 820 | 821 | 1   |
| 821 | 2   | 1   |
| 821 | 822 | 2   |
| 822 | 3   | 2   |
| 822 | 823 | 3   |
| 823 | 4   | 3   |
| 823 | 824 | 4   |
| 824 | 5   | 4   |
| 824 | 825 | 5   |
| 825 | 6   | 5   |

|     |     |    |
|-----|-----|----|
| 825 | 826 | 6  |
| 826 | 7   | 6  |
| 826 | 827 | 7  |
| 827 | 8   | 7  |
| 827 | 828 | 8  |
| 828 | 9   | 8  |
| 828 | 829 | 9  |
| 829 | 10  | 9  |
| 829 | 830 | 10 |
| 830 | 11  | 10 |
| 830 | 831 | 11 |
| 831 | 12  | 11 |
| 831 | 832 | 12 |
| 832 | 13  | 12 |
| 832 | 833 | 13 |
| 833 | 14  | 13 |
| 833 | 834 | 14 |
| 834 | 15  | 14 |
| 834 | 835 | 15 |
| 835 | 16  | 15 |
| 835 | 836 | 16 |
| 836 | 17  | 16 |
| 836 | 837 | 17 |
| 837 | 18  | 17 |
| 837 | 838 | 18 |
| 838 | 19  | 18 |

|     |     |    |
|-----|-----|----|
| 838 | 839 | 19 |
| 839 | 20  | 19 |
| 839 | 840 | 20 |
| 840 | 21  | 20 |

(c) Scheme 3

| VARIABLES = X, Y, T " |                  |                         |
|-----------------------|------------------|-------------------------|
| ZONE                  | N= 840 ,E = 1600 | ,f=FEPOINT, ET=TRIANGLE |
|                       | 0.05             | 0 6.719857227           |
|                       | 5.70E-02         | 0 8.301882782           |
|                       | 6.47E-02         | 0 9.819995165           |
|                       | 7.31E-02         | 0 11.27302676           |
|                       | 0.08241205       | 0 12.65609552           |
|                       | 9.26E-02         | 0 13.96077527           |
|                       | 0.10388466       | 0 15.17547126           |
|                       | 0.11625698       | 0 16.28618263           |
|                       | 0.12986653       | 0 17.27782576           |
|                       | 0.14483703       | 0 18.13621909           |
|                       | 0.16130458       | 0 18.85065899           |
|                       | 0.17941889       | 0 19.41673526           |
|                       | 0.19934463       | 0 19.8387012            |
|                       | 0.22126294       | 0 20.13048331           |
|                       | 0.24537308       | 0 20.31452599           |
|                       | 0.27189424       | 0 20.41829905           |
|                       | 0.30106752       | 0 20.46933655           |
|                       | 0.33315812       | 0 20.49057552           |

|            |            |             |
|------------|------------|-------------|
| 0.36845778 | 0          | 20.4977891  |
| 0.40728741 | 0          | 20.49986173 |
| 0.45       | 0          | 20.5        |
| 4.94E-02   | 7.82E-03   | 6.718585248 |
| 0.05637901 | 8.97E-03   | 8.321441106 |
| 6.41E-02   | 1.02E-02   | 9.856685925 |
| 7.25E-02   | 1.16E-02   | 11.32358151 |
| 0.08184635 | 1.32E-02   | 12.71742575 |
| 9.21E-02   | 0.01484482 | 14.02981238 |
| 0.10335201 | 1.67E-02   | 15.24907092 |
| 0.11574336 | 1.87E-02   | 16.3610913  |
| 0.12937385 | 2.10E-02   | 17.35072289 |
| 0.1443674  | 2.34E-02   | 18.20385717 |
| 0.16086029 | 2.62E-02   | 18.91011728 |
| 0.17900248 | 2.91E-02   | 19.46577382 |
| 0.19895888 | 0.03242145 | 19.8761444  |
| 0.22091092 | 3.60E-02   | 20.15649374 |
| 0.24505817 | 4.00E-02   | 20.33059931 |
| 0.27162015 | 4.44E-02   | 20.4268798  |
| 0.30083832 | 4.92E-02   | 20.47313879 |
| 0.3329783  | 5.45E-02   | 20.4918907  |
| 0.36833229 | 6.03E-02   | 20.49809889 |
| 0.40722168 | 6.67E-02   | 20.49987436 |
| 0.45       | 7.37E-02   | 20.5        |
| 4.76E-02   | 1.55E-02   | 6.717632265 |
| 5.46E-02   | 1.79E-02   | 8.391983012 |

|            |            |             |
|------------|------------|-------------|
| 6.23E-02   | 2.06E-02   | 9.985785798 |
| 7.08E-02   | 2.35E-02   | 11.49961466 |
| 8.02E-02   | 2.67E-02   | 12.92924459 |
| 0.09045078 | 3.03E-02   | 14.26621731 |
| 0.10176715 | 0.03422127 | 15.49853616 |
| 0.11421516 | 3.85E-02   | 16.61177224 |
| 0.12790797 | 4.33E-02   | 17.59080327 |
| 0.14297006 | 4.85E-02   | 18.42227925 |
| 0.15953836 | 5.42E-02   | 19.09766121 |
| 0.17776349 | 6.05E-02   | 19.61630621 |
| 0.19781113 | 6.75E-02   | 19.98767463 |
| 0.21986354 | 7.51E-02   | 20.23155873 |
| 0.24412119 | 8.35E-02   | 20.37558883 |
| 0.2708046  | 9.27E-02   | 20.4503058  |
| 0.30015636 | 0.10290882 | 20.48341506 |
| 0.33244329 | 0.1140874  | 20.49554111 |
| 0.36795891 | 0.12638384 | 20.49908061 |
| 0.4070261  | 0.13990993 | 20.49994442 |
| 0.45       | 0.15478862 | 20.5        |
| 4.46E-02   | 2.27E-02   | 6.717278479 |
| 5.16E-02   | 2.66E-02   | 8.521158454 |
| 5.94E-02   | 3.08E-02   | 10.21906398 |
| 6.80E-02   | 3.55E-02   | 11.81440141 |
| 0.07740396 | 4.06E-02   | 13.30401632 |
| 8.78E-02   | 4.63E-02   | 14.67950895 |
| 9.92E-02   | 0.05250809 | 15.92852652 |

|            |            |             |
|------------|------------|-------------|
| 0.11171    | 5.94E-02   | 17.03650383 |
| 0.12550497 | 6.69E-02   | 17.98911292 |
| 0.14067943 | 7.52E-02   | 18.77543391 |
| 0.15737134 | 8.43E-02   | 19.3914852  |
| 0.17573244 | 9.43E-02   | 19.84328399 |
| 0.19592965 | 0.10531579 | 20.14824245 |
| 0.21814659 | 0.11744082 | 20.33378584 |
| 0.24258521 | 0.13077836 | 20.43291007 |
| 0.2694677  | 0.14544966 | 20.47785982 |
| 0.29903843 | 0.16158808 | 20.49438738 |
| 0.33156624 | 0.17934035 | 20.49900169 |
| 0.36734683 | 0.19886784 | 20.49988686 |
| 0.40670548 | 0.22034808 | 20.49999396 |
| 0.45       | 0.24397635 | 20.5        |
| 4.05E-02   | 2.94E-02   | 6.717888337 |
| 4.76E-02   | 3.48E-02   | 8.712619141 |
| 5.55E-02   | 4.09E-02   | 10.55902972 |
| 6.41E-02   | 4.75E-02   | 12.26602623 |
| 7.36E-02   | 5.47E-02   | 13.83274875 |
| 8.41E-02   | 6.27E-02   | 15.25147447 |
| 9.56E-02   | 7.15E-02   | 16.51013351 |
| 0.10828957 | 8.12E-02   | 17.59526441 |
| 0.12222402 | 9.18E-02   | 18.49563975 |
| 0.13755191 | 0.10352659 | 19.20632051 |
| 0.15441259 | 0.11639983 | 19.73237477 |
| 0.17295934 | 0.1305604  | 20.09104263 |

|            |            |             |
|------------|------------|-------------|
| 0.19336076 | 0.14613703 | 20.31106909 |
| 0.21580233 | 0.16327132 | 20.42861217 |
| 0.24048805 | 0.18211904 | 20.48058321 |
| 0.26764235 | 0.20285153 | 20.49782457 |
| 0.29751207 | 0.22565727 | 20.50098384 |
| 0.33036877 | 0.25074358 | 20.50055271 |
| 0.36651113 | 0.27833853 | 20.50007688 |
| 0.40626774 | 0.30869297 | 20.4999898  |
| 0.45       | 0.34208285 | 20.5        |
| 3.54E-02   | 3.54E-02   | 6.719843624 |
| 4.26E-02   | 4.26E-02   | 8.965697038 |
| 5.06E-02   | 5.06E-02   | 10.99874464 |
| 5.93E-02   | 5.93E-02   | 12.83766458 |
| 6.90E-02   | 6.90E-02   | 14.48625162 |
| 7.96E-02   | 7.96E-02   | 15.93901702 |
| 9.12E-02   | 9.12E-02   | 17.18617105 |
| 0.10403809 | 0.10403809 | 18.2186717  |
| 0.11814591 | 0.11814591 | 19.03329549 |
| 0.13366451 | 0.13366451 | 19.63702331 |
| 0.15073497 | 0.15073497 | 20.04957098 |
| 0.16951247 | 0.16951247 | 20.30288471 |
| 0.19016772 | 0.19016772 | 20.43710572 |
| 0.2128885  | 0.2128885  | 20.49383325 |
| 0.23788136 | 0.23788136 | 20.50891227 |
| 0.2653735  | 0.2653735  | 20.50749669 |
| 0.29561485 | 0.29561485 | 20.50313869 |

|            |            |             |
|------------|------------|-------------|
| 0.32888034 | 0.32888034 | 20.50054137 |
| 0.36547239 | 0.36547239 | 20.49982223 |
| 0.40572363 | 0.40572363 | 20.49995802 |
| 0.45       | 0.45       | 20.5        |
| 2.94E-02   | 4.05E-02   | 6.722500645 |
| 3.48E-02   | 4.76E-02   | 8.721973558 |
| 4.09E-02   | 5.55E-02   | 10.57242119 |
| 4.75E-02   | 6.41E-02   | 12.28204688 |
| 5.47E-02   | 7.36E-02   | 13.84976519 |
| 0.06272013 | 8.41E-02   | 15.26759837 |
| 7.15E-02   | 9.56E-02   | 16.52334321 |
| 8.12E-02   | 0.10828957 | 17.60379776 |
| 9.18E-02   | 0.12222402 | 18.4985672  |
| 0.10352659 | 0.13755191 | 19.20404797 |
| 0.11639983 | 0.15441259 | 19.72674193 |
| 0.1305604  | 0.17295934 | 20.08478258 |
| 0.14613703 | 0.19336076 | 20.30672972 |
| 0.16327132 | 0.21580233 | 20.4274628  |
| 0.18211904 | 0.24048805 | 20.48219564 |
| 0.20285153 | 0.26764235 | 20.5006428  |
| 0.22565727 | 0.29751207 | 20.50345766 |
| 0.25074358 | 0.33036877 | 20.5019694  |
| 0.27833853 | 0.36651113 | 20.50057628 |
| 0.30869297 | 0.40626774 | 20.50002649 |
| 0.34208285 | 0.45       | 20.5        |
| 2.27E-02   | 4.46E-02   | 6.723018789 |



|            |            |             |
|------------|------------|-------------|
| 2.66E-02   | 5.16E-02   | 8.532676008 |
| 3.08E-02   | 5.94E-02   | 10.2356466  |
| 3.55E-02   | 6.80E-02   | 11.83469457 |
| 4.06E-02   | 0.07740396 | 13.32632679 |
| 4.63E-02   | 8.78E-02   | 14.70181686 |
| 5.25E-02   | 9.92E-02   | 15.94857197 |
| 5.94E-02   | 0.11171    | 17.05209299 |
| 6.69E-02   | 0.12550497 | 17.99864182 |
| 7.52E-02   | 0.14067943 | 18.77847441 |
| 8.43E-02   | 0.15737134 | 19.389141   |
| 9.43E-02   | 0.17573244 | 19.83800423 |
| 0.10531579 | 0.19592965 | 20.14298197 |
| 0.11744082 | 0.21814659 | 20.33080786 |
| 0.13077836 | 0.24258521 | 20.43289094 |
| 0.14544966 | 0.2694677  | 20.47989766 |
| 0.16158808 | 0.29903843 | 20.49690803 |
| 0.17934035 | 0.33156624 | 20.50084378 |
| 0.19886784 | 0.36734683 | 20.50075265 |
| 0.22034808 | 0.40670548 | 20.50008944 |
| 0.24397635 | 0.45       | 20.5        |
| 1.55E-02   | 4.76E-02   | 6.722375964 |
| 1.79E-02   | 5.46E-02   | 8.401324957 |
| 2.06E-02   | 6.23E-02   | 9.999257146 |
| 2.35E-02   | 7.08E-02   | 11.51631784 |
| 2.67E-02   | 8.02E-02   | 12.94800067 |
| 3.03E-02   | 9.05E-02   | 14.28558407 |

|            |            |             |
|------------|------------|-------------|
| 3.42E-02   | 0.10176715 | 15.51685685 |
| 3.85E-02   | 0.11421516 | 16.62734565 |
| 0.04327191 | 0.12790797 | 17.60220033 |
| 4.85E-02   | 0.14297006 | 18.42874561 |
| 5.42E-02   | 0.15953836 | 19.09944847 |
| 6.05E-02   | 0.17776349 | 19.61472001 |
| 6.75E-02   | 0.19781113 | 19.98469186 |
| 7.51E-02   | 0.21986354 | 20.22908497 |
| 8.35E-02   | 0.24412119 | 20.37470732 |
| 9.27E-02   | 0.2708046  | 20.45097702 |
| 0.10290882 | 0.30015636 | 20.48482983 |
| 0.1140874  | 0.33244329 | 20.49683386 |
| 0.12638384 | 0.36795891 | 20.49982535 |
| 0.13990993 | 0.4070261  | 20.50004718 |
| 0.15478862 | 0.45       | 20.5        |
| 7.82E-03   | 4.94E-02   | 6.721201143 |
| 8.97E-03   | 5.64E-02   | 8.326484702 |
| 1.02E-02   | 6.41E-02   | 9.863941803 |
| 1.16E-02   | 7.25E-02   | 11.33262794 |
| 1.32E-02   | 8.18E-02   | 12.72769234 |
| 0.01484482 | 0.09208714 | 14.04059093 |
| 1.67E-02   | 0.10335201 | 15.25953674 |
| 1.87E-02   | 0.11574336 | 16.37037421 |
| 2.10E-02   | 0.12937385 | 17.35804448 |
| 2.34E-02   | 0.1443674  | 18.20871647 |
| 2.62E-02   | 0.16086029 | 18.91246424 |

|            |            |             |
|------------|------------|-------------|
| 2.91E-02   | 0.17900248 | 19.46607711 |
| 3.24E-02   | 0.19895888 | 19.8752722  |
| 3.60E-02   | 0.22091092 | 20.15540702 |
| 4.00E-02   | 0.24505817 | 20.32998437 |
| 4.44E-02   | 0.27162015 | 20.42692851 |
| 4.92E-02   | 0.30083832 | 20.47361759 |
| 5.45E-02   | 0.3329783  | 20.49243062 |
| 0.06027741 | 0.36833229 | 20.49846068 |
| 6.67E-02   | 0.40722168 | 20.49993265 |
| 7.37E-02   | 0.45       | 20.5        |
| 2.33E-15   | 0.05       | 6.719857227 |
| 2.29E-15   | 5.70E-02   | 8.301882782 |
| 2.25E-15   | 6.47E-02   | 9.819995165 |
| 2.20E-15   | 7.31E-02   | 11.27302676 |
| 2.15E-15   | 0.08241205 | 12.65609552 |
| 2.09E-15   | 9.26E-02   | 13.96077527 |
| 2.02E-15   | 0.10388466 | 15.17547126 |
| 1.95E-15   | 0.11625698 | 16.28618263 |
| 1.87E-15   | 0.12986653 | 17.27782576 |
| 1.78E-15   | 0.14483703 | 18.13621909 |
| 1.68E-15   | 0.16130458 | 18.85065899 |
| 1.58E-15   | 0.17941889 | 19.41673526 |
| 1.46E-15   | 0.19934463 | 19.8387012  |
| 1.33E-15   | 0.22126294 | 20.13048331 |
| 1.19E-15   | 0.24537308 | 20.31452599 |
| 1.04E-15   | 0.27189424 | 20.41829905 |

|            |            |             |
|------------|------------|-------------|
| 8.69E-16   | 0.30106752 | 20.46933655 |
| 6.82E-16   | 0.33315812 | 20.49057552 |
| 4.76E-16   | 0.36845778 | 20.4977891  |
| 2.49E-16   | 0.40728741 | 20.49986173 |
| -3.47E-32  | 0.45       | 20.5        |
| -7.82E-03  | 4.94E-02   | 6.718585248 |
| -8.97E-03  | 5.64E-02   | 8.321441106 |
| -1.02E-02  | 0.06407307 | 9.856685925 |
| -1.16E-02  | 7.25E-02   | 11.32358151 |
| -1.32E-02  | 8.18E-02   | 12.71742575 |
| -1.48E-02  | 9.21E-02   | 14.02981238 |
| -1.67E-02  | 0.10335201 | 15.24907092 |
| -1.87E-02  | 0.11574336 | 16.3610913  |
| -2.10E-02  | 0.12937385 | 17.35072289 |
| -2.34E-02  | 0.1443674  | 18.20385717 |
| -2.62E-02  | 0.16086029 | 18.91011728 |
| -2.91E-02  | 0.17900248 | 19.46577382 |
| -3.24E-02  | 0.19895888 | 19.8761444  |
| -          |            |             |
| 0.03603179 | 0.22091092 | 20.15649374 |
| -4.00E-02  | 0.24505817 | 20.33059931 |
| -4.44E-02  | 0.27162015 | 20.4268798  |
| -4.92E-02  | 0.30083832 | 20.47313879 |
| -          |            |             |
| 0.05446292 | 0.3329783  | 20.4918907  |
| -6.03E-02  | 0.36833229 | 20.49809889 |

|            |            |             |
|------------|------------|-------------|
| -          |            |             |
| 0.06667334 | 0.40722168 | 20.49987436 |
| -7.37E-02  | 0.45       | 20.5        |
| -1.55E-02  | 4.76E-02   | 6.717632265 |
| -1.79E-02  | 5.46E-02   | 8.391983012 |
| -2.06E-02  | 6.23E-02   | 9.985785798 |
| -2.35E-02  | 7.08E-02   | 11.49961466 |
| -2.67E-02  | 8.02E-02   | 12.92924459 |
| -3.03E-02  | 9.05E-02   | 14.26621731 |
| -3.42E-02  | 0.10176715 | 15.49853616 |
| -3.85E-02  | 0.11421516 | 16.61177224 |
| -4.33E-02  | 0.12790797 | 17.59080327 |
| -4.85E-02  | 0.14297006 | 18.42227925 |
| -5.42E-02  | 0.15953836 | 19.09766121 |
| -6.05E-02  | 0.17776349 | 19.61630621 |
| -6.75E-02  | 0.19781113 | 19.98767463 |
| -7.51E-02  | 0.21986354 | 20.23155873 |
| -8.35E-02  | 0.24412119 | 20.37558883 |
| -9.27E-02  | 0.2708046  | 20.4503058  |
| -          |            |             |
| 0.10290882 | 0.30015636 | 20.48341506 |
| -0.1140874 | 0.33244329 | 20.49554111 |
| -          |            |             |
| 0.12638384 | 0.36795891 | 20.49908061 |
| -          |            |             |
| 0.13990993 | 0.4070261  | 20.49994442 |

|            |            |             |
|------------|------------|-------------|
| -          | 0.45       | 20.5        |
| 0.15478862 |            |             |
| -2.27E-02  | 4.46E-02   | 6.717278479 |
| -2.66E-02  | 5.16E-02   | 8.521158454 |
| -3.08E-02  | 5.94E-02   | 10.21906398 |
| -3.55E-02  | 6.80E-02   | 11.81440141 |
| -4.06E-02  | 7.74E-02   | 13.30401632 |
| -4.63E-02  | 8.78E-02   | 14.67950895 |
| -5.25E-02  | 9.92E-02   | 15.92852652 |
| -5.94E-02  | 0.11171    | 17.03650383 |
| -6.69E-02  | 0.12550497 | 17.98911292 |
| -7.52E-02  | 0.14067943 | 18.77543391 |
| -8.43E-02  | 0.15737134 | 19.3914852  |
| -          |            |             |
| 0.09429303 | 0.17573244 | 19.84328399 |
| -          |            |             |
| 0.10531579 | 0.19592965 | 20.14824245 |
| -          |            |             |
| 0.11744082 | 0.21814659 | 20.33378584 |
| -          |            |             |
| 0.13077836 | 0.24258521 | 20.43291007 |
| -          |            |             |
| 0.14544966 | 0.2694677  | 20.47785982 |
| -          |            |             |
| 0.16158808 | 0.29903843 | 20.49438738 |

|            |            |             |
|------------|------------|-------------|
| -          | 0.33156624 | 20.49900169 |
| 0.17934035 |            |             |
| -          | 0.36734683 | 20.49988686 |
| 0.19886784 |            |             |
| -          | 0.40670548 | 20.49999396 |
| 0.22034808 |            |             |
| -          | 0.45       | 20.5        |
| 0.24397635 |            |             |
| -          | 4.05E-02   | 6.717888337 |
| 0.02938926 |            |             |
| -3.48E-02  | 4.76E-02   | 8.712619141 |
| -4.09E-02  | 0.05546706 | 10.55902972 |
| -4.75E-02  | 0.06411925 | 12.26602623 |
| -5.47E-02  | 7.36E-02   | 13.83274875 |
| -6.27E-02  | 8.41E-02   | 15.25147447 |
| -7.15E-02  | 9.56E-02   | 16.51013351 |
| -8.12E-02  | 0.10828957 | 17.59526441 |
| -9.18E-02  | 0.12222402 | 18.49563975 |
| -          | 0.13755191 | 19.20632051 |
| 0.10352659 |            |             |
| -          | 0.15441259 | 19.73237477 |
| 0.11639983 |            |             |
| -0.1305604 | 0.17295934 | 20.09104263 |
| -          | 0.19336076 | 20.31106909 |
| 0.14613703 |            |             |

|            |            |             |
|------------|------------|-------------|
| -          | 0.21580233 | 20.42861217 |
| 0.16327132 |            |             |
| -          | 0.24048805 | 20.48058321 |
| 0.18211904 |            |             |
| -          | 0.26764235 | 20.49782457 |
| 0.20285153 |            |             |
| -          | 0.29751207 | 20.50098384 |
| 0.22565727 |            |             |
| -          | 0.33036877 | 20.50055271 |
| 0.25074358 |            |             |
| -          | 0.36651113 | 20.50007688 |
| 0.27833853 |            |             |
| -          | 0.40626774 | 20.4999898  |
| 0.30869297 |            |             |
| -          | 0.45       | 20.5        |
| 0.34208285 |            |             |
| -3.54E-02  | 3.54E-02   | 6.719843624 |
| -4.26E-02  | 4.26E-02   | 8.965697038 |
| -5.06E-02  | 5.06E-02   | 10.99874464 |
| -5.93E-02  | 5.93E-02   | 12.83766458 |
| -6.90E-02  | 6.90E-02   | 14.48625162 |
| -7.96E-02  | 7.96E-02   | 15.93901702 |
| -9.12E-02  | 9.12E-02   | 17.18617105 |
| -          |            |             |
| 0.10403809 | 0.10403809 | 18.2186717  |



|            |            |             |
|------------|------------|-------------|
| -          | 0.11814591 | 19.03329549 |
| 0.11814591 | -          |             |
| -          | 0.13366451 | 19.63702331 |
| 0.13366451 | -          |             |
| -          | 0.15073497 | 20.04957098 |
| 0.15073497 | -          |             |
| -          | 0.16951247 | 20.30288471 |
| 0.16951247 | -          |             |
| -          | 0.19016772 | 20.43710572 |
| 0.19016772 | -          |             |
| -0.2128885 | 0.2128885  | 20.49383325 |
| -          | 0.23788136 | 20.50891227 |
| 0.23788136 | -          |             |
| -0.2653735 | 0.2653735  | 20.50749669 |
| -          | 0.29561485 | 20.50313869 |
| 0.29561485 | -          |             |
| -          | 0.32888034 | 20.50054137 |
| 0.32888034 | -          |             |
| -          | 0.36547239 | 20.49982223 |
| 0.36547239 | -          |             |
| -          | 0.40572363 | 20.49995802 |
| 0.40572363 | -          |             |
| -0.45      | 0.45       | 20.5        |
| -4.05E-02  | 2.94E-02   | 6.722500645 |
| -4.76E-02  | 3.48E-02   | 8.721973558 |
| -5.55E-02  | 4.09E-02   | 10.57242119 |

|            |            |             |
|------------|------------|-------------|
| -6.41E-02  | 4.75E-02   | 12.28204688 |
| -7.36E-02  | 5.47E-02   | 13.84976519 |
| -8.41E-02  | 6.27E-02   | 15.26759837 |
| -          |            |             |
| 0.09562189 | 7.15E-02   | 16.52334321 |
| -          |            |             |
| 0.10828957 | 8.12E-02   | 17.60379776 |
| -          |            |             |
| 0.12222402 | 9.18E-02   | 18.4985672  |
| -          |            |             |
| 0.13755191 | 0.10352659 | 19.20404797 |
| -          |            |             |
| 0.15441259 | 0.11639983 | 19.72674193 |
| -          |            |             |
| 0.17295934 | 0.1305604  | 20.08478258 |
| -          |            |             |
| 0.19336076 | 0.14613703 | 20.30672972 |
| -          |            |             |
| 0.21580233 | 0.16327132 | 20.4274628  |
| -          |            |             |
| 0.24048805 | 0.18211904 | 20.48219564 |
| -          |            |             |
| 0.26764235 | 0.20285153 | 20.5006428  |
| -          |            |             |
| 0.29751207 | 0.22565727 | 20.50345766 |

|            |            |             |
|------------|------------|-------------|
| -          | 0.25074358 | 20.5019694  |
| 0.33036877 |            |             |
| -          | 0.27833853 | 20.50057628 |
| 0.36651113 |            |             |
| -          | 0.30869297 | 20.50002649 |
| 0.40626774 |            |             |
| -0.45      | 0.34208285 | 20.5        |
| -4.46E-02  | 2.27E-02   | 6.723018789 |
| -5.16E-02  | 2.66E-02   | 8.532676008 |
| -5.94E-02  | 3.08E-02   | 10.2356466  |
| -6.80E-02  | 3.55E-02   | 11.83469457 |
| -          | 4.06E-02   | 13.32632679 |
| 0.07740396 |            |             |
| -8.78E-02  | 4.63E-02   | 14.70181686 |
| -9.92E-02  | 5.25E-02   | 15.94857197 |
| -0.11171   | 5.94E-02   | 17.05209299 |
| -          | 6.69E-02   | 17.99864182 |
| 0.12550497 |            |             |
| -          | 0.07516262 | 18.77847441 |
| 0.14067943 |            |             |
| -          | 8.43E-02   | 19.389141   |
| 0.15737134 |            |             |
| -          | 9.43E-02   | 19.83800423 |
| 0.17573244 |            |             |
| -          | 0.10531579 | 20.14298197 |
| 0.19592965 |            |             |

|            |            |             |
|------------|------------|-------------|
| -          | 0.11744082 | 20.33080786 |
| 0.21814659 |            |             |
| -          | 0.13077836 | 20.43289094 |
| 0.24258521 |            |             |
| -0.2694677 | 0.14544966 | 20.47989766 |
| -          |            |             |
| 0.29903843 | 0.16158808 | 20.49690803 |
| -          |            |             |
| 0.33156624 | 0.17934035 | 20.50084378 |
| -          |            |             |
| 0.36734683 | 0.19886784 | 20.50075265 |
| -          |            |             |
| 0.40670548 | 0.22034808 | 20.50008944 |
| -0.45      | 0.24397635 | 20.5        |
| -4.76E-02  | 1.55E-02   | 6.722375964 |
| -5.46E-02  | 1.79E-02   | 8.401324957 |
| -6.23E-02  | 2.06E-02   | 9.999257146 |
| -7.08E-02  | 2.35E-02   | 11.51631784 |
| -8.02E-02  | 2.67E-02   | 12.94800067 |
| -9.05E-02  | 3.03E-02   | 14.28558407 |
| -          |            |             |
| 0.10176715 | 3.42E-02   | 15.51685685 |
| -          |            |             |
| 0.11421516 | 0.0385311  | 16.62734565 |
| -          |            |             |
| 0.12790797 | 4.33E-02   | 17.60220033 |

|            |            |             |
|------------|------------|-------------|
| -          | 0.0484868  | 18.42874561 |
| 0.14297006 |            |             |
| -          | 5.42E-02   | 19.09944847 |
| 0.15953836 |            |             |
| -          | 6.05E-02   | 19.61472001 |
| 0.17776349 |            |             |
| -          | 6.75E-02   | 19.98469186 |
| 0.19781113 |            |             |
| -          | 7.51E-02   | 20.22908497 |
| 0.21986354 |            |             |
| -          | 8.35E-02   | 20.37470732 |
| 0.24412119 |            |             |
| -0.2708046 | 9.27E-02   | 20.45097702 |
| -          |            |             |
| 0.30015636 | 0.10290882 | 20.48482983 |
| -          |            |             |
| 0.33244329 | 0.1140874  | 20.49683386 |
| -          |            |             |
| 0.36795891 | 0.12638384 | 20.49982535 |
| -0.4070261 | 0.13990993 | 20.50004718 |
| -0.45      | 0.15478862 | 20.5        |
| -4.94E-02  | 7.82E-03   | 6.721201143 |
| -5.64E-02  | 8.97E-03   | 8.326484702 |
| -          |            |             |
| 0.06407307 | 1.02E-02   | 9.863941803 |
| -7.25E-02  | 1.16E-02   | 11.33262794 |

|            |            |             |
|------------|------------|-------------|
| -8.18E-02  | 1.32E-02   | 12.72769234 |
| -9.21E-02  | 1.48E-02   | 14.04059093 |
| -          |            |             |
| 0.10335201 | 1.67E-02   | 15.25953674 |
| -          |            |             |
| 0.11574336 | 1.87E-02   | 16.37037421 |
| -          |            |             |
| 0.12937385 | 0.02097717 | 17.35804448 |
| -0.1443674 | 0.02344308 | 18.20871647 |
| -          |            |             |
| 0.16086029 | 2.62E-02   | 18.91246424 |
| -          |            |             |
| 0.17900248 | 0.02913933 | 19.46607711 |
| -          |            |             |
| 0.19895888 | 3.24E-02   | 19.8752722  |
| -          |            |             |
| 0.22091092 | 3.60E-02   | 20.15540702 |
| -          |            |             |
| 0.24505817 | 4.00E-02   | 20.32998437 |
| -          |            |             |
| 0.27162015 | 4.44E-02   | 20.42692851 |
| -          |            |             |
| 0.30083832 | 4.92E-02   | 20.47361759 |
| -0.3329783 | 0.05446292 | 20.49243062 |
| -          |            |             |
| 0.36833229 | 6.03E-02   | 20.49846068 |

|            |          |             |
|------------|----------|-------------|
| -          | 6.67E-02 | 20.49993265 |
| 0.40722168 |          |             |
| -0.45      | 7.37E-02 | 20.5        |
| -0.05      | 4.67E-15 | 6.719857227 |
| -5.70E-02  | 4.59E-15 | 8.301882782 |
| -6.47E-02  | 4.50E-15 | 9.819995165 |
| -7.31E-02  | 4.40E-15 | 11.27302676 |
| -          |          |             |
| 0.08241205 | 4.29E-15 | 12.65609552 |
| -9.26E-02  | 4.17E-15 | 13.96077527 |
| -          |          |             |
| 0.10388466 | 4.04E-15 | 15.17547126 |
| -          |          |             |
| 0.11625698 | 3.90E-15 | 16.28618263 |
| -          |          |             |
| 0.12986653 | 3.74E-15 | 17.27782576 |
| -          |          |             |
| 0.14483703 | 3.56E-15 | 18.13621909 |
| -          |          |             |
| 0.16130458 | 3.37E-15 | 18.85065899 |
| -          |          |             |
| 0.17941889 | 3.16E-15 | 19.41673526 |
| -          |          |             |
| 0.19934463 | 2.93E-15 | 19.8387012  |
| -          |          |             |
| 0.22126294 | 2.67E-15 | 20.13048331 |

|            |            |             |
|------------|------------|-------------|
| -          | 2.39E-15   | 20.31452599 |
| 0.24537308 |            |             |
| -          | 2.08E-15   | 20.41829905 |
| 0.27189424 |            |             |
| -          | 1.74E-15   | 20.46933655 |
| 0.30106752 |            |             |
| -          | 1.36E-15   | 20.49057552 |
| 0.33315812 |            |             |
| -          | 9.52E-16   | 20.4977891  |
| 0.36845778 |            |             |
| -          | 4.99E-16   | 20.49986173 |
| 0.40728741 |            |             |
| -0.45      | -6.93E-32  | 20.5        |
| -4.94E-02  | -7.82E-03  | 6.718585248 |
| -5.64E-02  | -8.97E-03  | 8.321441106 |
| -6.41E-02  | -1.02E-02  | 9.856685925 |
| -7.25E-02  | -0.0116294 | 11.32358151 |
| -8.18E-02  | -1.32E-02  | 12.71742575 |
| -          | -1.48E-02  | 14.02981238 |
| 0.09208714 |            |             |
| -          | -1.67E-02  | 15.24907092 |
| 0.10335201 |            |             |
| -          | -1.87E-02  | 16.3610913  |
| 0.11574336 |            |             |
| -          | -2.10E-02  | 17.35072289 |
| 0.12937385 |            |             |



|            |           |             |
|------------|-----------|-------------|
| -0.1443674 | -2.34E-02 | 18.20385717 |
| -          |           |             |
| 0.16086029 | -2.62E-02 | 18.91011728 |
| -          |           |             |
| 0.17900248 | -2.91E-02 | 19.46577382 |
| -          |           |             |
| 0.19895888 | -3.24E-02 | 19.8761444  |
| -          |           |             |
| 0.22091092 | -3.60E-02 | 20.15649374 |
| -          |           |             |
| 0.24505817 | -4.00E-02 | 20.33059931 |
| -          |           |             |
| 0.27162015 | -4.44E-02 | 20.4268798  |
| -          |           |             |
| 0.30083832 | -0.049177 | 20.47313879 |
| -0.3329783 | -5.45E-02 | 20.4918907  |
| -          |           |             |
| 0.36833229 | -6.03E-02 | 20.49809889 |
| -          |           |             |
| 0.40722168 | -6.67E-02 | 20.49987436 |
| -0.45      | -7.37E-02 | 20.5        |
| -4.76E-02  | -1.55E-02 | 6.717632265 |
| -5.46E-02  | -1.79E-02 | 8.391983012 |
| -6.23E-02  | -2.06E-02 | 9.985785798 |
| -7.08E-02  | -2.35E-02 | 11.49961466 |
| -8.02E-02  | -2.67E-02 | 12.92924459 |

|            |            |             |
|------------|------------|-------------|
| -9.05E-02  | -3.03E-02  | 14.26621731 |
| -          |            |             |
| 0.10176715 | -3.42E-02  | 15.49853616 |
| -          |            |             |
| 0.11421516 | -3.85E-02  | 16.61177224 |
| -          |            |             |
| 0.12790797 | -4.33E-02  | 17.59080327 |
| -          |            |             |
| 0.14297006 | -4.85E-02  | 18.42227925 |
| -          |            |             |
| 0.15953836 | -5.42E-02  | 19.09766121 |
| -          |            |             |
| 0.17776349 | -6.05E-02  | 19.61630621 |
| -          |            |             |
| 0.19781113 | -6.75E-02  | 19.98767463 |
| -          |            |             |
| 0.21986354 | -7.51E-02  | 20.23155873 |
| -          |            |             |
| 0.24412119 | -8.35E-02  | 20.37558883 |
| -0.2708046 | -9.27E-02  | 20.4503058  |
| -          |            |             |
| 0.30015636 | -0.1029088 | 20.48341506 |
| -          |            |             |
| 0.33244329 | -0.1140874 | 20.49554111 |
| -          |            |             |
| 0.36795891 | -0.1263838 | 20.49908061 |

|            |            |             |
|------------|------------|-------------|
| -0.4070261 | -0.1399099 | 20.49994442 |
| -0.45      | -0.1547886 | 20.5        |
| -4.46E-02  | -2.27E-02  | 6.717278479 |
| -5.16E-02  | -2.66E-02  | 8.521158454 |
| -5.94E-02  | -3.08E-02  | 10.21906398 |
| -6.80E-02  | -3.55E-02  | 11.81440141 |
| -7.74E-02  | -4.06E-02  | 13.30401632 |
| -8.78E-02  | -4.63E-02  | 14.67950895 |
| -9.92E-02  | -5.25E-02  | 15.92852652 |
| -0.11171   | -5.94E-02  | 17.03650383 |
| -          |            |             |
| 0.12550497 | -6.69E-02  | 17.98911292 |
| -          |            |             |
| 0.14067943 | -7.52E-02  | 18.77543391 |
| -          |            |             |
| 0.15737134 | -8.43E-02  | 19.3914852  |
| -          |            |             |
| 0.17573244 | -9.43E-02  | 19.84328399 |
| -          |            |             |
| 0.19592965 | -0.1053158 | 20.14824245 |
| -          |            |             |
| 0.21814659 | -0.1174408 | 20.33378584 |
| -          |            |             |
| 0.24258521 | -0.1307784 | 20.43291007 |
| -0.2694677 | -0.1454497 | 20.47785982 |

|            |            |             |
|------------|------------|-------------|
| -          | -0.1615881 | 20.49438738 |
| 0.29903843 |            |             |
| -          | -0.1793403 | 20.49900169 |
| 0.33156624 |            |             |
| -          | -0.1988678 | 20.49988686 |
| 0.36734683 |            |             |
| -          | -0.2203481 | 20.49999396 |
| 0.40670548 |            |             |
| -0.45      | -0.2439763 | 20.5        |
| -4.05E-02  | -2.94E-02  | 6.717888337 |
| -4.76E-02  | -3.48E-02  | 8.712619141 |
| -5.55E-02  | -4.09E-02  | 10.55902972 |
| -6.41E-02  | -4.75E-02  | 12.26602623 |
| -7.36E-02  | -5.47E-02  | 13.83274875 |
| -8.41E-02  | -0.0627201 | 15.25147447 |
| -9.56E-02  | -7.15E-02  | 16.51013351 |
| -          | -8.12E-02  | 17.59526441 |
| 0.10828957 |            |             |
| -          | -9.18E-02  | 18.49563975 |
| 0.12222402 |            |             |
| -          | -0.1035266 | 19.20632051 |
| 0.13755191 |            |             |
| -          | -0.1163998 | 19.73237477 |
| 0.15441259 |            |             |
| -          | -0.1305604 | 20.09104263 |
| 0.17295934 |            |             |

|            |            |             |
|------------|------------|-------------|
| -          | -0.146137  | 20.31106909 |
| 0.19336076 |            |             |
| -          | -0.1632713 | 20.42861217 |
| 0.21580233 |            |             |
| -          | -0.182119  | 20.48058321 |
| 0.24048805 |            |             |
| -          | -0.2028515 | 20.49782457 |
| 0.26764235 |            |             |
| -          | -0.2256573 | 20.50098384 |
| 0.29751207 |            |             |
| -          | -0.2507436 | 20.50055271 |
| 0.33036877 |            |             |
| -          | -0.2783385 | 20.50007688 |
| 0.36651113 |            |             |
| -          | -0.308693  | 20.4999898  |
| 0.40626774 |            |             |
| -0.45      | -0.3420828 | 20.5        |
| -3.54E-02  | -3.54E-02  | 6.719843624 |
| -          | -4.26E-02  | 8.965697038 |
| 0.04259488 |            |             |
| -5.06E-02  | -0.0505584 | 10.99874464 |
| -5.93E-02  | -5.93E-02  | 12.83766458 |
| -6.90E-02  | -6.90E-02  | 14.48625162 |
| -7.96E-02  | -7.96E-02  | 15.93901702 |
| -9.12E-02  | -9.12E-02  | 17.18617105 |

|            |            |             |
|------------|------------|-------------|
| -          | -0.1040381 | 18.2186717  |
| 0.10403809 |            |             |
| -          | -0.1181459 | 19.03329549 |
| 0.11814591 |            |             |
| -          | -0.1336645 | 19.63702331 |
| 0.13366451 |            |             |
| -          | -0.150735  | 20.04957098 |
| 0.15073497 |            |             |
| -          | -0.1695125 | 20.30288471 |
| 0.16951247 |            |             |
| -          | -0.1901677 | 20.43710572 |
| 0.19016772 |            |             |
| -0.2128885 | -0.2128885 | 20.49383325 |
| -          | -0.2378814 | 20.50891227 |
| 0.23788136 |            |             |
| -0.2653735 | -0.2653735 | 20.50749669 |
| -          | -0.2956149 | 20.50313869 |
| 0.29561485 |            |             |
| -          | -0.3288803 | 20.50054137 |
| 0.32888034 |            |             |
| -          | -0.3654724 | 20.49982223 |
| 0.36547239 |            |             |
| -          | -0.4057236 | 20.49995802 |
| 0.40572363 |            |             |
| -0.45      | -0.45      | 20.5        |
| -2.94E-02  | -4.05E-02  | 6.722500645 |

|            |            |             |
|------------|------------|-------------|
| -3.48E-02  | -4.76E-02  | 8.721973558 |
| -4.09E-02  | -5.55E-02  | 10.57242119 |
| -4.75E-02  | -6.41E-02  | 12.28204688 |
| -          |            |             |
| 0.05472686 | -7.36E-02  | 13.84976519 |
| -6.27E-02  | -8.41E-02  | 15.26759837 |
| -          |            |             |
| 0.07151273 | -9.56E-02  | 16.52334321 |
| -8.12E-02  | -0.1082896 | 17.60379776 |
| -9.18E-02  | -0.122224  | 18.4985672  |
| -          |            |             |
| 0.10352659 | -0.1375519 | 19.20404797 |
| -          |            |             |
| 0.11639983 | -0.1544126 | 19.72674193 |
| -0.1305604 | -0.1729593 | 20.08478258 |
| -          |            |             |
| 0.14613703 | -0.1933608 | 20.30672972 |
| -          |            |             |
| 0.16327132 | -0.2158023 | 20.4274628  |
| -          |            |             |
| 0.18211904 | -0.2404881 | 20.48219564 |
| -          |            |             |
| 0.20285153 | -0.2676423 | 20.5006428  |
| -          |            |             |
| 0.22565727 | -0.2975121 | 20.50345766 |

|            |            |             |
|------------|------------|-------------|
| -          | -0.3303688 | 20.5019694  |
| 0.25074358 |            |             |
| -          | -0.3665111 | 20.50057628 |
| 0.27833853 |            |             |
| -          | -0.4062677 | 20.50002649 |
| 0.30869297 |            |             |
| -          | -0.45      | 20.5        |
| 0.34208285 |            |             |
| -          | -4.46E-02  | 6.723018789 |
| 0.02269952 |            |             |
| -2.66E-02  | -5.16E-02  | 8.532676008 |
| -3.08E-02  | -5.94E-02  | 10.2356466  |
| -3.55E-02  | -6.80E-02  | 11.83469457 |
| -4.06E-02  | -0.077404  | 13.32632679 |
| -4.63E-02  | -8.78E-02  | 14.70181686 |
| -5.25E-02  | -9.92E-02  | 15.94857197 |
| -5.94E-02  | -0.11171   | 17.05209299 |
| -6.69E-02  | -0.125505  | 17.99864182 |
| -7.52E-02  | -0.1406794 | 18.77847441 |
| -8.43E-02  | -0.1573713 | 19.389141   |
| -9.43E-02  | -0.1757324 | 19.83800423 |
| -          | -0.1959297 | 20.14298197 |
| 0.10531579 |            |             |
| -          | -0.2181466 | 20.33080786 |
| 0.11744082 |            |             |



|            |            |             |
|------------|------------|-------------|
| -          | -0.2425852 | 20.43289094 |
| 0.13077836 |            |             |
| -          | -0.2694677 | 20.47989766 |
| 0.14544966 |            |             |
| -          | -0.2990384 | 20.49690803 |
| 0.16158808 |            |             |
| -          | -0.3315662 | 20.50084378 |
| 0.17934035 |            |             |
| -          | -0.3673468 | 20.50075265 |
| 0.19886784 |            |             |
| -          | -0.4067055 | 20.50008944 |
| 0.22034808 |            |             |
| -          | -0.45      | 20.5        |
| 0.24397635 |            |             |
| -1.55E-02  | -4.76E-02  | 6.722375964 |
| -1.79E-02  | -5.46E-02  | 8.401324957 |
| -0.0205597 | -6.23E-02  | 9.999257146 |
| -2.35E-02  | -0.0708108 | 11.51631784 |
| -2.67E-02  | -8.02E-02  | 12.94800067 |
| -3.03E-02  | -9.05E-02  | 14.28558407 |
| -3.42E-02  | -0.1017672 | 15.51685685 |
| -3.85E-02  | -0.1142152 | 16.62734565 |
| -4.33E-02  | -0.127908  | 17.60220033 |
| -4.85E-02  | -0.1429701 | 18.42874561 |
| -5.42E-02  | -0.1595384 | 19.09944847 |
| -6.05E-02  | -0.1777635 | 19.61472001 |

|            |            |             |
|------------|------------|-------------|
| -6.75E-02  | -0.1978111 | 19.98469186 |
| -7.51E-02  | -0.2198635 | 20.22908497 |
| -8.35E-02  | -0.2441212 | 20.37470732 |
| -9.27E-02  | -0.2708046 | 20.45097702 |
| -          |            |             |
| 0.10290882 | -0.3001564 | 20.48482983 |
| -0.1140874 | -0.3324433 | 20.49683386 |
| -          |            |             |
| 0.12638384 | -0.3679589 | 20.49982535 |
| -          |            |             |
| 0.13990993 | -0.4070261 | 20.50004718 |
| -          |            |             |
| 0.15478862 | -0.45      | 20.5        |
| -7.82E-03  | -4.94E-02  | 6.721201143 |
| -8.97E-03  | -0.056379  | 8.326484702 |
| -1.02E-02  | -6.41E-02  | 9.863941803 |
| -1.16E-02  | -7.25E-02  | 11.33262794 |
| -1.32E-02  | -0.0818463 | 12.72769234 |
| -1.48E-02  | -9.21E-02  | 14.04059093 |
| -1.67E-02  | -0.103352  | 15.25953674 |
| -1.87E-02  | -0.1157434 | 16.37037421 |
| -2.10E-02  | -0.1293739 | 17.35804448 |
| -2.34E-02  | -0.1443674 | 18.20871647 |
| -2.62E-02  | -0.1608603 | 18.91246424 |
| -2.91E-02  | -0.1790025 | 19.46607711 |
| -3.24E-02  | -0.1989589 | 19.8752722  |

|            |            |             |
|------------|------------|-------------|
| -3.60E-02  | -0.2209109 | 20.15540702 |
| -          |            |             |
| 0.04000316 | -0.2450582 | 20.32998437 |
| -4.44E-02  | -0.2716201 | 20.42692851 |
| -4.92E-02  | -0.3008383 | 20.47361759 |
| -5.45E-02  | -0.3329783 | 20.49243062 |
| -          |            |             |
| 0.06027741 | -0.3683323 | 20.49846068 |
| -6.67E-02  | -0.4072217 | 20.49993265 |
| -7.37E-02  | -0.45      | 20.5        |
| -7.03E-15  | -0.05      | 6.719857227 |
| -6.90E-15  | -5.70E-02  | 8.301882782 |
| -6.77E-15  | -6.47E-02  | 9.819995165 |
| -6.62E-15  | -7.31E-02  | 11.27302676 |
| -6.46E-15  | -0.082412  | 12.65609552 |
| -6.28E-15  | -9.26E-02  | 13.96077527 |
| -6.08E-15  | -0.1038847 | 15.17547126 |
| -5.86E-15  | -0.116257  | 16.28618263 |
| -5.62E-15  | -0.1298665 | 17.27782576 |
| -5.36E-15  | -0.144837  | 18.13621909 |
| -5.07E-15  | -0.1613046 | 18.85065899 |
| -4.75E-15  | -0.1794189 | 19.41673526 |
| -4.40E-15  | -0.1993446 | 19.8387012  |
| -4.02E-15  | -0.2212629 | 20.13048331 |
| -3.59E-15  | -0.2453731 | 20.31452599 |
| -3.13E-15  | -0.2718942 | 20.41829905 |

|            |            |             |
|------------|------------|-------------|
| -2.62E-15  | -0.3010675 | 20.46933655 |
| -2.05E-15  | -0.3331581 | 20.49057552 |
| -1.43E-15  | -0.3684578 | 20.4977891  |
| -7.50E-16  | -0.4072874 | 20.49986173 |
| 3.46E-31   | -0.45      | 20.5        |
| 7.82E-03   | -0.0493844 | 6.718585248 |
| 8.97E-03   | -5.64E-02  | 8.321441106 |
| 0.01023749 | -6.41E-02  | 9.856685925 |
| 1.16E-02   | -7.25E-02  | 11.32358151 |
| 1.32E-02   | -0.0818463 | 12.71742575 |
| 1.48E-02   | -9.21E-02  | 14.02981238 |
| 1.67E-02   | -0.103352  | 15.24907092 |
| 1.87E-02   | -0.1157434 | 16.3610913  |
| 2.10E-02   | -0.1293739 | 17.35072289 |
| 2.34E-02   | -0.1443674 | 18.20385717 |
| 2.62E-02   | -0.1608603 | 18.91011728 |
| 2.91E-02   | -0.1790025 | 19.46577382 |
| 3.24E-02   | -0.1989589 | 19.8761444  |
| 3.60E-02   | -0.2209109 | 20.15649374 |
| 0.04000316 | -0.2450582 | 20.33059931 |
| 4.44E-02   | -0.2716201 | 20.4268798  |
| 4.92E-02   | -0.3008383 | 20.47313879 |
| 5.45E-02   | -0.3329783 | 20.4918907  |
| 6.03E-02   | -0.3683323 | 20.49809889 |
| 6.67E-02   | -0.4072217 | 20.49987436 |
| 7.37E-02   | -0.45      | 20.5        |

|            |            |             |
|------------|------------|-------------|
| 1.55E-02   | -0.0475528 | 6.717632265 |
| 1.79E-02   | -5.46E-02  | 8.391983012 |
| 2.06E-02   | -6.23E-02  | 9.985785798 |
| 2.35E-02   | -7.08E-02  | 11.49961466 |
| 2.67E-02   | -8.02E-02  | 12.92924459 |
| 3.03E-02   | -9.05E-02  | 14.26621731 |
| 3.42E-02   | -0.1017672 | 15.49853616 |
| 3.85E-02   | -0.1142152 | 16.61177224 |
| 4.33E-02   | -0.127908  | 17.59080327 |
| 4.85E-02   | -0.1429701 | 18.42227925 |
| 5.42E-02   | -0.1595384 | 19.09766121 |
| 6.05E-02   | -0.1777635 | 19.61630621 |
| 6.75E-02   | -0.1978111 | 19.98767463 |
| 7.51E-02   | -0.2198635 | 20.23155873 |
| 8.35E-02   | -0.2441212 | 20.37558883 |
| 9.27E-02   | -0.2708046 | 20.4503058  |
| 0.10290882 | -0.3001564 | 20.48341506 |
| 0.1140874  | -0.3324433 | 20.49554111 |
| 0.12638384 | -0.3679589 | 20.49908061 |
| 0.13990993 | -0.4070261 | 20.49994442 |
| 0.15478862 | -0.45      | 20.5        |
| 2.27E-02   | -4.46E-02  | 6.717278479 |
| 2.66E-02   | -5.16E-02  | 8.521158454 |
| 3.08E-02   | -5.94E-02  | 10.21906398 |
| 3.55E-02   | -6.80E-02  | 11.81440141 |
| 0.04062961 | -7.74E-02  | 13.30401632 |

|            |            |             |
|------------|------------|-------------|
| 4.63E-02   | -8.78E-02  | 14.67950895 |
| 5.25E-02   | -0.0991691 | 15.92852652 |
| 5.94E-02   | -0.11171   | 17.03650383 |
| 6.69E-02   | -0.125505  | 17.98911292 |
| 7.52E-02   | -0.1406794 | 18.77543391 |
| 8.43E-02   | -0.1573713 | 19.3914852  |
| 9.43E-02   | -0.1757324 | 19.84328399 |
| 0.10531579 | -0.1959297 | 20.14824245 |
| 0.11744082 | -0.2181466 | 20.33378584 |
| 0.13077836 | -0.2425852 | 20.43291007 |
| 0.14544966 | -0.2694677 | 20.47785982 |
| 0.16158808 | -0.2990384 | 20.49438738 |
| 0.17934035 | -0.3315662 | 20.49900169 |
| 0.19886784 | -0.3673468 | 20.49988686 |
| 0.22034808 | -0.4067055 | 20.49999396 |
| 0.24397635 | -0.45      | 20.5        |
| 2.94E-02   | -0.0404508 | 6.717888337 |
| 3.48E-02   | -4.76E-02  | 8.712619141 |
| 4.09E-02   | -5.55E-02  | 10.55902972 |
| 4.75E-02   | -6.41E-02  | 12.26602623 |
| 5.47E-02   | -7.36E-02  | 13.83274875 |
| 6.27E-02   | -0.0841058 | 15.25147447 |
| 7.15E-02   | -9.56E-02  | 16.51013351 |
| 0.08118459 | -0.1082896 | 17.59526441 |
| 9.18E-02   | -0.122224  | 18.49563975 |
| 0.10352659 | -0.1375519 | 19.20632051 |

|            |            |             |
|------------|------------|-------------|
| 0.11639983 | -0.1544126 | 19.73237477 |
| 0.1305604  | -0.1729593 | 20.09104263 |
| 0.14613703 | -0.1933608 | 20.31106909 |
| 0.16327132 | -0.2158023 | 20.42861217 |
| 0.18211904 | -0.2404881 | 20.48058321 |
| 0.20285153 | -0.2676423 | 20.49782457 |
| 0.22565727 | -0.2975121 | 20.50098384 |
| 0.25074358 | -0.3303688 | 20.50055271 |
| 0.27833853 | -0.3665111 | 20.50007688 |
| 0.30869297 | -0.4062677 | 20.4999898  |
| 0.34208285 | -0.45      | 20.5        |
| 3.54E-02   | -3.54E-02  | 6.719843624 |
| 4.26E-02   | -4.26E-02  | 8.965697038 |
| 5.06E-02   | -5.06E-02  | 10.99874464 |
| 5.93E-02   | -5.93E-02  | 12.83766458 |
| 6.90E-02   | -6.90E-02  | 14.48625162 |
| 7.96E-02   | -7.96E-02  | 15.93901702 |
| 0.09121281 | -0.0912128 | 17.18617105 |
| 0.10403809 | -0.1040381 | 18.2186717  |
| 0.11814591 | -0.1181459 | 19.03329549 |
| 0.13366451 | -0.1336645 | 19.63702331 |
| 0.15073497 | -0.150735  | 20.04957098 |
| 0.16951247 | -0.1695125 | 20.30288471 |
| 0.19016772 | -0.1901677 | 20.43710572 |
| 0.2128885  | -0.2128885 | 20.49383325 |
| 0.23788136 | -0.2378814 | 20.50891227 |

|            |            |             |
|------------|------------|-------------|
| 0.2653735  | -0.2653735 | 20.50749669 |
| 0.29561485 | -0.2956149 | 20.50313869 |
| 0.32888034 | -0.3288803 | 20.50054137 |
| 0.36547239 | -0.3654724 | 20.49982223 |
| 0.40572363 | -0.4057236 | 20.49995802 |
| 0.45       | -0.45      | 20.5        |
| 4.05E-02   | -2.94E-02  | 6.722500645 |
| 4.76E-02   | -3.48E-02  | 8.721973558 |
| 5.55E-02   | -4.09E-02  | 10.57242119 |
| 6.41E-02   | -4.75E-02  | 12.28204688 |
| 7.36E-02   | -5.47E-02  | 13.84976519 |
| 8.41E-02   | -6.27E-02  | 15.26759837 |
| 9.56E-02   | -7.15E-02  | 16.52334321 |
| 0.10828957 | -0.0811846 | 17.60379776 |
| 0.12222402 | -9.18E-02  | 18.4985672  |
| 0.13755191 | -0.1035266 | 19.20404797 |
| 0.15441259 | -0.1163998 | 19.72674193 |
| 0.17295934 | -0.1305604 | 20.08478258 |
| 0.19336076 | -0.146137  | 20.30672972 |
| 0.21580233 | -0.1632713 | 20.4274628  |
| 0.24048805 | -0.182119  | 20.48219564 |
| 0.26764235 | -0.2028515 | 20.5006428  |
| 0.29751207 | -0.2256573 | 20.50345766 |
| 0.33036877 | -0.2507436 | 20.5019694  |
| 0.36651113 | -0.2783385 | 20.50057628 |
| 0.40626774 | -0.308693  | 20.50002649 |



|            |            |             |
|------------|------------|-------------|
| 0.45       | -0.3420828 | 20.5        |
| 4.46E-02   | -0.0226995 | 6.723018789 |
| 5.16E-02   | -2.66E-02  | 8.532676008 |
| 5.94E-02   | -3.08E-02  | 10.2356466  |
| 6.80E-02   | -3.55E-02  | 11.83469457 |
| 7.74E-02   | -4.06E-02  | 13.32632679 |
| 8.78E-02   | -4.63E-02  | 14.70181686 |
| 9.92E-02   | -5.25E-02  | 15.94857197 |
| 0.11171    | -0.0593524 | 17.05209299 |
| 0.12550497 | -6.69E-02  | 17.99864182 |
| 0.14067943 | -7.52E-02  | 18.77847441 |
| 0.15737134 | -8.43E-02  | 19.389141   |
| 0.17573244 | -9.43E-02  | 19.83800423 |
| 0.19592965 | -0.1053158 | 20.14298197 |
| 0.21814659 | -0.1174408 | 20.33080786 |
| 0.24258521 | -0.1307784 | 20.43289094 |
| 0.2694677  | -0.1454497 | 20.47989766 |
| 0.29903843 | -0.1615881 | 20.49690803 |
| 0.33156624 | -0.1793403 | 20.50084378 |
| 0.36734683 | -0.1988678 | 20.50075265 |
| 0.40670548 | -0.2203481 | 20.50008944 |
| 0.45       | -0.2439763 | 20.5        |
| 4.76E-02   | -1.55E-02  | 6.722375964 |
| 5.46E-02   | -1.79E-02  | 8.401324957 |
| 0.06230864 | -2.06E-02  | 9.999257146 |
| 7.08E-02   | -0.0235034 | 11.51631784 |

|            |            |             |
|------------|------------|-------------|
| 8.02E-02   | -0.0267414 | 12.94800067 |
| 9.05E-02   | -3.03E-02  | 14.28558407 |
| 0.10176715 | -3.42E-02  | 15.51685685 |
| 0.11421516 | -3.85E-02  | 16.62734565 |
| 0.12790797 | -4.33E-02  | 17.60220033 |
| 0.14297006 | -4.85E-02  | 18.42874561 |
| 0.15953836 | -5.42E-02  | 19.09944847 |
| 0.17776349 | -6.05E-02  | 19.61472001 |
| 0.19781113 | -6.75E-02  | 19.98469186 |
| 0.21986354 | -7.51E-02  | 20.22908497 |
| 0.24412119 | -8.35E-02  | 20.37470732 |
| 0.2708046  | -9.27E-02  | 20.45097702 |
| 0.30015636 | -0.1029088 | 20.48482983 |
| 0.33244329 | -0.1140874 | 20.49683386 |
| 0.36795891 | -0.1263838 | 20.49982535 |
| 0.4070261  | -0.1399099 | 20.50004718 |
| 0.45       | -0.1547886 | 20.5        |
| 4.94E-02   | -7.82E-03  | 6.721201143 |
| 5.64E-02   | -8.97E-03  | 8.326484702 |
| 6.41E-02   | -1.02E-02  | 9.863941803 |
| 7.25E-02   | -0.0116294 | 11.33262794 |
| 8.18E-02   | -1.32E-02  | 12.72769234 |
| 0.09208714 | -1.48E-02  | 14.04059093 |
| 0.10335201 | -1.67E-02  | 15.25953674 |
| 0.11574336 | -1.87E-02  | 16.37037421 |
| 0.12937385 | -2.10E-02  | 17.35804448 |

|            |            |             |
|------------|------------|-------------|
| 0.1443674  | -2.34E-02  | 18.20871647 |
| 0.16086029 | -2.62E-02  | 18.91246424 |
| 0.17900248 | -2.91E-02  | 19.46607711 |
| 0.19895888 | -3.24E-02  | 19.8752722  |
| 0.22091092 | -3.60E-02  | 20.15540702 |
| 0.24505817 | -4.00E-02  | 20.32998437 |
| 0.27162015 | -0.0443717 | 20.42692851 |
| 0.30083832 | -4.92E-02  | 20.47361759 |
| 0.3329783  | -5.45E-02  | 20.49243062 |
| 0.36833229 | -6.03E-02  | 20.49846068 |
| 0.40722168 | -6.67E-02  | 20.49993265 |
| 0.45       | -7.37E-02  | 20.5        |
| 1          | 2          | 22          |
| 2          | 23         | 22          |
| 2          | 3          | 23          |
| 3          | 24         | 23          |
| 3          | 4          | 24          |
| 4          | 25         | 24          |
| 4          | 5          | 25          |
| 5          | 26         | 25          |
| 5          | 6          | 26          |
| 6          | 27         | 26          |
| 6          | 7          | 27          |
| 7          | 28         | 27          |
| 7          | 8          | 28          |
| 8          | 29         | 28          |

|    |    |    |
|----|----|----|
| 8  | 9  | 29 |
| 9  | 30 | 29 |
| 9  | 10 | 30 |
| 10 | 31 | 30 |
| 10 | 11 | 31 |
| 11 | 32 | 31 |
| 11 | 12 | 32 |
| 12 | 33 | 32 |
| 12 | 13 | 33 |
| 13 | 34 | 33 |
| 13 | 14 | 34 |
| 14 | 35 | 34 |
| 14 | 15 | 35 |
| 15 | 36 | 35 |
| 15 | 16 | 36 |
| 16 | 37 | 36 |
| 16 | 17 | 37 |
| 17 | 38 | 37 |
| 17 | 18 | 38 |
| 18 | 39 | 38 |
| 18 | 19 | 39 |
| 19 | 40 | 39 |
| 19 | 20 | 40 |
| 20 | 41 | 40 |
| 20 | 21 | 41 |
| 21 | 42 | 41 |

|    |    |    |
|----|----|----|
| 22 | 23 | 43 |
| 23 | 44 | 43 |
| 23 | 24 | 44 |
| 24 | 45 | 44 |
| 24 | 25 | 45 |
| 25 | 46 | 45 |
| 25 | 26 | 46 |
| 26 | 47 | 46 |
| 26 | 27 | 47 |
| 27 | 48 | 47 |
| 27 | 28 | 48 |
| 28 | 49 | 48 |
| 28 | 29 | 49 |
| 29 | 50 | 49 |
| 29 | 30 | 50 |
| 30 | 51 | 50 |
| 30 | 31 | 51 |
| 31 | 52 | 51 |
| 31 | 32 | 52 |
| 32 | 53 | 52 |
| 32 | 33 | 53 |
| 33 | 54 | 53 |
| 33 | 34 | 54 |
| 34 | 55 | 54 |
| 34 | 35 | 55 |
| 35 | 56 | 55 |

|    |    |    |
|----|----|----|
| 35 | 36 | 56 |
| 36 | 57 | 56 |
| 36 | 37 | 57 |
| 37 | 58 | 57 |
| 37 | 38 | 58 |
| 38 | 59 | 58 |
| 38 | 39 | 59 |
| 39 | 60 | 59 |
| 39 | 40 | 60 |
| 40 | 61 | 60 |
| 40 | 41 | 61 |
| 41 | 62 | 61 |
| 41 | 42 | 62 |
| 42 | 63 | 62 |
| 43 | 44 | 64 |
| 44 | 65 | 64 |
| 44 | 45 | 65 |
| 45 | 66 | 65 |
| 45 | 46 | 66 |
| 46 | 67 | 66 |
| 46 | 47 | 67 |
| 47 | 68 | 67 |
| 47 | 48 | 68 |
| 48 | 69 | 68 |
| 48 | 49 | 69 |
| 49 | 70 | 69 |

|    |    |    |
|----|----|----|
| 49 | 50 | 70 |
| 50 | 71 | 70 |
| 50 | 51 | 71 |
| 51 | 72 | 71 |
| 51 | 52 | 72 |
| 52 | 73 | 72 |
| 52 | 53 | 73 |
| 53 | 74 | 73 |
| 53 | 54 | 74 |
| 54 | 75 | 74 |
| 54 | 55 | 75 |
| 55 | 76 | 75 |
| 55 | 56 | 76 |
| 56 | 77 | 76 |
| 56 | 57 | 77 |
| 57 | 78 | 77 |
| 57 | 58 | 78 |
| 58 | 79 | 78 |
| 58 | 59 | 79 |
| 59 | 80 | 79 |
| 59 | 60 | 80 |
| 60 | 81 | 80 |
| 60 | 61 | 81 |
| 61 | 82 | 81 |
| 61 | 62 | 82 |
| 62 | 83 | 82 |

|    |    |    |
|----|----|----|
| 62 | 63 | 83 |
| 63 | 84 | 83 |
| 64 | 65 | 85 |
| 65 | 86 | 85 |
| 65 | 66 | 86 |
| 66 | 87 | 86 |
| 66 | 67 | 87 |
| 67 | 88 | 87 |
| 67 | 68 | 88 |
| 68 | 89 | 88 |
| 68 | 69 | 89 |
| 69 | 90 | 89 |
| 69 | 70 | 90 |
| 70 | 91 | 90 |
| 70 | 71 | 91 |
| 71 | 92 | 91 |
| 71 | 72 | 92 |
| 72 | 93 | 92 |
| 72 | 73 | 93 |
| 73 | 94 | 93 |
| 73 | 74 | 94 |
| 74 | 95 | 94 |
| 74 | 75 | 95 |
| 75 | 96 | 95 |
| 75 | 76 | 96 |
| 76 | 97 | 96 |



|    |     |     |
|----|-----|-----|
| 76 | 77  | 97  |
| 77 | 98  | 97  |
| 77 | 78  | 98  |
| 78 | 99  | 98  |
| 78 | 79  | 99  |
| 79 | 100 | 99  |
| 79 | 80  | 100 |
| 80 | 101 | 100 |
| 80 | 81  | 101 |
| 81 | 102 | 101 |
| 81 | 82  | 102 |
| 82 | 103 | 102 |
| 82 | 83  | 103 |
| 83 | 104 | 103 |
| 83 | 84  | 104 |
| 84 | 105 | 104 |
| 85 | 86  | 106 |
| 86 | 107 | 106 |
| 86 | 87  | 107 |
| 87 | 108 | 107 |
| 87 | 88  | 108 |
| 88 | 109 | 108 |
| 88 | 89  | 109 |
| 89 | 110 | 109 |
| 89 | 90  | 110 |
| 90 | 111 | 110 |

|     |     |     |
|-----|-----|-----|
| 90  | 91  | 111 |
| 91  | 112 | 111 |
| 91  | 92  | 112 |
| 92  | 113 | 112 |
| 92  | 93  | 113 |
| 93  | 114 | 113 |
| 93  | 94  | 114 |
| 94  | 115 | 114 |
| 94  | 95  | 115 |
| 95  | 116 | 115 |
| 95  | 96  | 116 |
| 96  | 117 | 116 |
| 96  | 97  | 117 |
| 97  | 118 | 117 |
| 97  | 98  | 118 |
| 98  | 119 | 118 |
| 98  | 99  | 119 |
| 99  | 120 | 119 |
| 99  | 100 | 120 |
| 100 | 121 | 120 |
| 100 | 101 | 121 |
| 101 | 122 | 121 |
| 101 | 102 | 122 |
| 102 | 123 | 122 |
| 102 | 103 | 123 |
| 103 | 124 | 123 |

|     |     |     |
|-----|-----|-----|
| 103 | 104 | 124 |
| 104 | 125 | 124 |
| 104 | 105 | 125 |
| 105 | 126 | 125 |
| 106 | 107 | 127 |
| 107 | 128 | 127 |
| 107 | 108 | 128 |
| 108 | 129 | 128 |
| 108 | 109 | 129 |
| 109 | 130 | 129 |
| 109 | 110 | 130 |
| 110 | 131 | 130 |
| 110 | 111 | 131 |
| 111 | 132 | 131 |
| 111 | 112 | 132 |
| 112 | 133 | 132 |
| 112 | 113 | 133 |
| 113 | 134 | 133 |
| 113 | 114 | 134 |
| 114 | 135 | 134 |
| 114 | 115 | 135 |
| 115 | 136 | 135 |
| 115 | 116 | 136 |
| 116 | 137 | 136 |
| 116 | 117 | 137 |
| 117 | 138 | 137 |

|     |     |     |
|-----|-----|-----|
| 117 | 118 | 138 |
| 118 | 139 | 138 |
| 118 | 119 | 139 |
| 119 | 140 | 139 |
| 119 | 120 | 140 |
| 120 | 141 | 140 |
| 120 | 121 | 141 |
| 121 | 142 | 141 |
| 121 | 122 | 142 |
| 122 | 143 | 142 |
| 122 | 123 | 143 |
| 123 | 144 | 143 |
| 123 | 124 | 144 |
| 124 | 145 | 144 |
| 124 | 125 | 145 |
| 125 | 146 | 145 |
| 125 | 126 | 146 |
| 126 | 147 | 146 |
| 127 | 128 | 148 |
| 128 | 149 | 148 |
| 128 | 129 | 149 |
| 129 | 150 | 149 |
| 129 | 130 | 150 |
| 130 | 151 | 150 |
| 130 | 131 | 151 |
| 131 | 152 | 151 |

|     |     |     |
|-----|-----|-----|
| 131 | 132 | 152 |
| 132 | 153 | 152 |
| 132 | 133 | 153 |
| 133 | 154 | 153 |
| 133 | 134 | 154 |
| 134 | 155 | 154 |
| 134 | 135 | 155 |
| 135 | 156 | 155 |
| 135 | 136 | 156 |
| 136 | 157 | 156 |
| 136 | 137 | 157 |
| 137 | 158 | 157 |
| 137 | 138 | 158 |
| 138 | 159 | 158 |
| 138 | 139 | 159 |
| 139 | 160 | 159 |
| 139 | 140 | 160 |
| 140 | 161 | 160 |
| 140 | 141 | 161 |
| 141 | 162 | 161 |
| 141 | 142 | 162 |
| 142 | 163 | 162 |
| 142 | 143 | 163 |
| 143 | 164 | 163 |
| 143 | 144 | 164 |
| 144 | 165 | 164 |

|     |     |     |
|-----|-----|-----|
| 144 | 145 | 165 |
| 145 | 166 | 165 |
| 145 | 146 | 166 |
| 146 | 167 | 166 |
| 146 | 147 | 167 |
| 147 | 168 | 167 |
| 148 | 149 | 169 |
| 149 | 170 | 169 |
| 149 | 150 | 170 |
| 150 | 171 | 170 |
| 150 | 151 | 171 |
| 151 | 172 | 171 |
| 151 | 152 | 172 |
| 152 | 173 | 172 |
| 152 | 153 | 173 |
| 153 | 174 | 173 |
| 153 | 154 | 174 |
| 154 | 175 | 174 |
| 154 | 155 | 175 |
| 155 | 176 | 175 |
| 155 | 156 | 176 |
| 156 | 177 | 176 |
| 156 | 157 | 177 |
| 157 | 178 | 177 |
| 157 | 158 | 178 |
| 158 | 179 | 178 |

|     |     |     |
|-----|-----|-----|
| 158 | 159 | 179 |
| 159 | 180 | 179 |
| 159 | 160 | 180 |
| 160 | 181 | 180 |
| 160 | 161 | 181 |
| 161 | 182 | 181 |
| 161 | 162 | 182 |
| 162 | 183 | 182 |
| 162 | 163 | 183 |
| 163 | 184 | 183 |
| 163 | 164 | 184 |
| 164 | 185 | 184 |
| 164 | 165 | 185 |
| 165 | 186 | 185 |
| 165 | 166 | 186 |
| 166 | 187 | 186 |
| 166 | 167 | 187 |
| 167 | 188 | 187 |
| 167 | 168 | 188 |
| 168 | 189 | 188 |
| 169 | 170 | 190 |
| 170 | 191 | 190 |
| 170 | 171 | 191 |
| 171 | 192 | 191 |
| 171 | 172 | 192 |
| 172 | 193 | 192 |

|     |     |     |
|-----|-----|-----|
| 172 | 173 | 193 |
| 173 | 194 | 193 |
| 173 | 174 | 194 |
| 174 | 195 | 194 |
| 174 | 175 | 195 |
| 175 | 196 | 195 |
| 175 | 176 | 196 |
| 176 | 197 | 196 |
| 176 | 177 | 197 |
| 177 | 198 | 197 |
| 177 | 178 | 198 |
| 178 | 199 | 198 |
| 178 | 179 | 199 |
| 179 | 200 | 199 |
| 179 | 180 | 200 |
| 180 | 201 | 200 |
| 180 | 181 | 201 |
| 181 | 202 | 201 |
| 181 | 182 | 202 |
| 182 | 203 | 202 |
| 182 | 183 | 203 |
| 183 | 204 | 203 |
| 183 | 184 | 204 |
| 184 | 205 | 204 |
| 184 | 185 | 205 |
| 185 | 206 | 205 |



|     |     |     |
|-----|-----|-----|
| 185 | 186 | 206 |
| 186 | 207 | 206 |
| 186 | 187 | 207 |
| 187 | 208 | 207 |
| 187 | 188 | 208 |
| 188 | 209 | 208 |
| 188 | 189 | 209 |
| 189 | 210 | 209 |
| 190 | 191 | 211 |
| 191 | 212 | 211 |
| 191 | 192 | 212 |
| 192 | 213 | 212 |
| 192 | 193 | 213 |
| 193 | 214 | 213 |
| 193 | 194 | 214 |
| 194 | 215 | 214 |
| 194 | 195 | 215 |
| 195 | 216 | 215 |
| 195 | 196 | 216 |
| 196 | 217 | 216 |
| 196 | 197 | 217 |
| 197 | 218 | 217 |
| 197 | 198 | 218 |
| 198 | 219 | 218 |
| 198 | 199 | 219 |
| 199 | 220 | 219 |

|     |     |     |
|-----|-----|-----|
| 199 | 200 | 220 |
| 200 | 221 | 220 |
| 200 | 201 | 221 |
| 201 | 222 | 221 |
| 201 | 202 | 222 |
| 202 | 223 | 222 |
| 202 | 203 | 223 |
| 203 | 224 | 223 |
| 203 | 204 | 224 |
| 204 | 225 | 224 |
| 204 | 205 | 225 |
| 205 | 226 | 225 |
| 205 | 206 | 226 |
| 206 | 227 | 226 |
| 206 | 207 | 227 |
| 207 | 228 | 227 |
| 207 | 208 | 228 |
| 208 | 229 | 228 |
| 208 | 209 | 229 |
| 209 | 230 | 229 |
| 209 | 210 | 230 |
| 210 | 231 | 230 |
| 211 | 212 | 232 |
| 212 | 233 | 232 |
| 212 | 213 | 233 |
| 213 | 234 | 233 |

|     |     |     |
|-----|-----|-----|
| 213 | 214 | 234 |
| 214 | 235 | 234 |
| 214 | 215 | 235 |
| 215 | 236 | 235 |
| 215 | 216 | 236 |
| 216 | 237 | 236 |
| 216 | 217 | 237 |
| 217 | 238 | 237 |
| 217 | 218 | 238 |
| 218 | 239 | 238 |
| 218 | 219 | 239 |
| 219 | 240 | 239 |
| 219 | 220 | 240 |
| 220 | 241 | 240 |
| 220 | 221 | 241 |
| 221 | 242 | 241 |
| 221 | 222 | 242 |
| 222 | 243 | 242 |
| 222 | 223 | 243 |
| 223 | 244 | 243 |
| 223 | 224 | 244 |
| 224 | 245 | 244 |
| 224 | 225 | 245 |
| 225 | 246 | 245 |
| 225 | 226 | 246 |
| 226 | 247 | 246 |

|     |     |     |
|-----|-----|-----|
| 226 | 227 | 247 |
| 227 | 248 | 247 |
| 227 | 228 | 248 |
| 228 | 249 | 248 |
| 228 | 229 | 249 |
| 229 | 250 | 249 |
| 229 | 230 | 250 |
| 230 | 251 | 250 |
| 230 | 231 | 251 |
| 231 | 252 | 251 |
| 232 | 233 | 253 |
| 233 | 254 | 253 |
| 233 | 234 | 254 |
| 234 | 255 | 254 |
| 234 | 235 | 255 |
| 235 | 256 | 255 |
| 235 | 236 | 256 |
| 236 | 257 | 256 |
| 236 | 237 | 257 |
| 237 | 258 | 257 |
| 237 | 238 | 258 |
| 238 | 259 | 258 |
| 238 | 239 | 259 |
| 239 | 260 | 259 |
| 239 | 240 | 260 |
| 240 | 261 | 260 |

|     |     |     |
|-----|-----|-----|
| 240 | 241 | 261 |
| 241 | 262 | 261 |
| 241 | 242 | 262 |
| 242 | 263 | 262 |
| 242 | 243 | 263 |
| 243 | 264 | 263 |
| 243 | 244 | 264 |
| 244 | 265 | 264 |
| 244 | 245 | 265 |
| 245 | 266 | 265 |
| 245 | 246 | 266 |
| 246 | 267 | 266 |
| 246 | 247 | 267 |
| 247 | 268 | 267 |
| 247 | 248 | 268 |
| 248 | 269 | 268 |
| 248 | 249 | 269 |
| 249 | 270 | 269 |
| 249 | 250 | 270 |
| 250 | 271 | 270 |
| 250 | 251 | 271 |
| 251 | 272 | 271 |
| 251 | 252 | 272 |
| 252 | 273 | 272 |
| 253 | 254 | 274 |
| 254 | 275 | 274 |

|     |     |     |
|-----|-----|-----|
| 254 | 255 | 275 |
| 255 | 276 | 275 |
| 255 | 256 | 276 |
| 256 | 277 | 276 |
| 256 | 257 | 277 |
| 257 | 278 | 277 |
| 257 | 258 | 278 |
| 258 | 279 | 278 |
| 258 | 259 | 279 |
| 259 | 280 | 279 |
| 259 | 260 | 280 |
| 260 | 281 | 280 |
| 260 | 261 | 281 |
| 261 | 282 | 281 |
| 261 | 262 | 282 |
| 262 | 283 | 282 |
| 262 | 263 | 283 |
| 263 | 284 | 283 |
| 263 | 264 | 284 |
| 264 | 285 | 284 |
| 264 | 265 | 285 |
| 265 | 286 | 285 |
| 265 | 266 | 286 |
| 266 | 287 | 286 |
| 266 | 267 | 287 |
| 267 | 288 | 287 |

|     |     |     |
|-----|-----|-----|
| 267 | 268 | 288 |
| 268 | 289 | 288 |
| 268 | 269 | 289 |
| 269 | 290 | 289 |
| 269 | 270 | 290 |
| 270 | 291 | 290 |
| 270 | 271 | 291 |
| 271 | 292 | 291 |
| 271 | 272 | 292 |
| 272 | 293 | 292 |
| 272 | 273 | 293 |
| 273 | 294 | 293 |
| 274 | 275 | 295 |
| 275 | 296 | 295 |
| 275 | 276 | 296 |
| 276 | 297 | 296 |
| 276 | 277 | 297 |
| 277 | 298 | 297 |
| 277 | 278 | 298 |
| 278 | 299 | 298 |
| 278 | 279 | 299 |
| 279 | 300 | 299 |
| 279 | 280 | 300 |
| 280 | 301 | 300 |
| 280 | 281 | 301 |
| 281 | 302 | 301 |

|     |     |     |
|-----|-----|-----|
| 281 | 282 | 302 |
| 282 | 303 | 302 |
| 282 | 283 | 303 |
| 283 | 304 | 303 |
| 283 | 284 | 304 |
| 284 | 305 | 304 |
| 284 | 285 | 305 |
| 285 | 306 | 305 |
| 285 | 286 | 306 |
| 286 | 307 | 306 |
| 286 | 287 | 307 |
| 287 | 308 | 307 |
| 287 | 288 | 308 |
| 288 | 309 | 308 |
| 288 | 289 | 309 |
| 289 | 310 | 309 |
| 289 | 290 | 310 |
| 290 | 311 | 310 |
| 290 | 291 | 311 |
| 291 | 312 | 311 |
| 291 | 292 | 312 |
| 292 | 313 | 312 |
| 292 | 293 | 313 |
| 293 | 314 | 313 |
| 293 | 294 | 314 |
| 294 | 315 | 314 |



|     |     |     |
|-----|-----|-----|
| 295 | 296 | 316 |
| 296 | 317 | 316 |
| 296 | 297 | 317 |
| 297 | 318 | 317 |
| 297 | 298 | 318 |
| 298 | 319 | 318 |
| 298 | 299 | 319 |
| 299 | 320 | 319 |
| 299 | 300 | 320 |
| 300 | 321 | 320 |
| 300 | 301 | 321 |
| 301 | 322 | 321 |
| 301 | 302 | 322 |
| 302 | 323 | 322 |
| 302 | 303 | 323 |
| 303 | 324 | 323 |
| 303 | 304 | 324 |
| 304 | 325 | 324 |
| 304 | 305 | 325 |
| 305 | 326 | 325 |
| 305 | 306 | 326 |
| 306 | 327 | 326 |
| 306 | 307 | 327 |
| 307 | 328 | 327 |
| 307 | 308 | 328 |
| 308 | 329 | 328 |

|     |     |     |
|-----|-----|-----|
| 308 | 309 | 329 |
| 309 | 330 | 329 |
| 309 | 310 | 330 |
| 310 | 331 | 330 |
| 310 | 311 | 331 |
| 311 | 332 | 331 |
| 311 | 312 | 332 |
| 312 | 333 | 332 |
| 312 | 313 | 333 |
| 313 | 334 | 333 |
| 313 | 314 | 334 |
| 314 | 335 | 334 |
| 314 | 315 | 335 |
| 315 | 336 | 335 |
| 316 | 317 | 337 |
| 317 | 338 | 337 |
| 317 | 318 | 338 |
| 318 | 339 | 338 |
| 318 | 319 | 339 |
| 319 | 340 | 339 |
| 319 | 320 | 340 |
| 320 | 341 | 340 |
| 320 | 321 | 341 |
| 321 | 342 | 341 |
| 321 | 322 | 342 |
| 322 | 343 | 342 |

|     |     |     |
|-----|-----|-----|
| 322 | 323 | 343 |
| 323 | 344 | 343 |
| 323 | 324 | 344 |
| 324 | 345 | 344 |
| 324 | 325 | 345 |
| 325 | 346 | 345 |
| 325 | 326 | 346 |
| 326 | 347 | 346 |
| 326 | 327 | 347 |
| 327 | 348 | 347 |
| 327 | 328 | 348 |
| 328 | 349 | 348 |
| 328 | 329 | 349 |
| 329 | 350 | 349 |
| 329 | 330 | 350 |
| 330 | 351 | 350 |
| 330 | 331 | 351 |
| 331 | 352 | 351 |
| 331 | 332 | 352 |
| 332 | 353 | 352 |
| 332 | 333 | 353 |
| 333 | 354 | 353 |
| 333 | 334 | 354 |
| 334 | 355 | 354 |
| 334 | 335 | 355 |
| 335 | 356 | 355 |

|     |     |     |
|-----|-----|-----|
| 335 | 336 | 356 |
| 336 | 357 | 356 |
| 337 | 338 | 358 |
| 338 | 359 | 358 |
| 338 | 339 | 359 |
| 339 | 360 | 359 |
| 339 | 340 | 360 |
| 340 | 361 | 360 |
| 340 | 341 | 361 |
| 341 | 362 | 361 |
| 341 | 342 | 362 |
| 342 | 363 | 362 |
| 342 | 343 | 363 |
| 343 | 364 | 363 |
| 343 | 344 | 364 |
| 344 | 365 | 364 |
| 344 | 345 | 365 |
| 345 | 366 | 365 |
| 345 | 346 | 366 |
| 346 | 367 | 366 |
| 346 | 347 | 367 |
| 347 | 368 | 367 |
| 347 | 348 | 368 |
| 348 | 369 | 368 |
| 348 | 349 | 369 |
| 349 | 370 | 369 |

|     |     |     |
|-----|-----|-----|
| 349 | 350 | 370 |
| 350 | 371 | 370 |
| 350 | 351 | 371 |
| 351 | 372 | 371 |
| 351 | 352 | 372 |
| 352 | 373 | 372 |
| 352 | 353 | 373 |
| 353 | 374 | 373 |
| 353 | 354 | 374 |
| 354 | 375 | 374 |
| 354 | 355 | 375 |
| 355 | 376 | 375 |
| 355 | 356 | 376 |
| 356 | 377 | 376 |
| 356 | 357 | 377 |
| 357 | 378 | 377 |
| 358 | 359 | 379 |
| 359 | 380 | 379 |
| 359 | 360 | 380 |
| 360 | 381 | 380 |
| 360 | 361 | 381 |
| 361 | 382 | 381 |
| 361 | 362 | 382 |
| 362 | 383 | 382 |
| 362 | 363 | 383 |
| 363 | 384 | 383 |

|     |     |     |
|-----|-----|-----|
| 363 | 364 | 384 |
| 364 | 385 | 384 |
| 364 | 365 | 385 |
| 365 | 386 | 385 |
| 365 | 366 | 386 |
| 366 | 387 | 386 |
| 366 | 367 | 387 |
| 367 | 388 | 387 |
| 367 | 368 | 388 |
| 368 | 389 | 388 |
| 368 | 369 | 389 |
| 369 | 390 | 389 |
| 369 | 370 | 390 |
| 370 | 391 | 390 |
| 370 | 371 | 391 |
| 371 | 392 | 391 |
| 371 | 372 | 392 |
| 372 | 393 | 392 |
| 372 | 373 | 393 |
| 373 | 394 | 393 |
| 373 | 374 | 394 |
| 374 | 395 | 394 |
| 374 | 375 | 395 |
| 375 | 396 | 395 |
| 375 | 376 | 396 |
| 376 | 397 | 396 |

|     |     |     |
|-----|-----|-----|
| 376 | 377 | 397 |
| 377 | 398 | 397 |
| 377 | 378 | 398 |
| 378 | 399 | 398 |
| 379 | 380 | 400 |
| 380 | 401 | 400 |
| 380 | 381 | 401 |
| 381 | 402 | 401 |
| 381 | 382 | 402 |
| 382 | 403 | 402 |
| 382 | 383 | 403 |
| 383 | 404 | 403 |
| 383 | 384 | 404 |
| 384 | 405 | 404 |
| 384 | 385 | 405 |
| 385 | 406 | 405 |
| 385 | 386 | 406 |
| 386 | 407 | 406 |
| 386 | 387 | 407 |
| 387 | 408 | 407 |
| 387 | 388 | 408 |
| 388 | 409 | 408 |
| 388 | 389 | 409 |
| 389 | 410 | 409 |
| 389 | 390 | 410 |
| 390 | 411 | 410 |

|     |     |     |
|-----|-----|-----|
| 390 | 391 | 411 |
| 391 | 412 | 411 |
| 391 | 392 | 412 |
| 392 | 413 | 412 |
| 392 | 393 | 413 |
| 393 | 414 | 413 |
| 393 | 394 | 414 |
| 394 | 415 | 414 |
| 394 | 395 | 415 |
| 395 | 416 | 415 |
| 395 | 396 | 416 |
| 396 | 417 | 416 |
| 396 | 397 | 417 |
| 397 | 418 | 417 |
| 397 | 398 | 418 |
| 398 | 419 | 418 |
| 398 | 399 | 419 |
| 399 | 420 | 419 |
| 400 | 401 | 421 |
| 401 | 422 | 421 |
| 401 | 402 | 422 |
| 402 | 423 | 422 |
| 402 | 403 | 423 |
| 403 | 424 | 423 |
| 403 | 404 | 424 |
| 404 | 425 | 424 |



|     |     |     |
|-----|-----|-----|
| 404 | 405 | 425 |
| 405 | 426 | 425 |
| 405 | 406 | 426 |
| 406 | 427 | 426 |
| 406 | 407 | 427 |
| 407 | 428 | 427 |
| 407 | 408 | 428 |
| 408 | 429 | 428 |
| 408 | 409 | 429 |
| 409 | 430 | 429 |
| 409 | 410 | 430 |
| 410 | 431 | 430 |
| 410 | 411 | 431 |
| 411 | 432 | 431 |
| 411 | 412 | 432 |
| 412 | 433 | 432 |
| 412 | 413 | 433 |
| 413 | 434 | 433 |
| 413 | 414 | 434 |
| 414 | 435 | 434 |
| 414 | 415 | 435 |
| 415 | 436 | 435 |
| 415 | 416 | 436 |
| 416 | 437 | 436 |
| 416 | 417 | 437 |
| 417 | 438 | 437 |

|     |     |     |
|-----|-----|-----|
| 417 | 418 | 438 |
| 418 | 439 | 438 |
| 418 | 419 | 439 |
| 419 | 440 | 439 |
| 419 | 420 | 440 |
| 420 | 441 | 440 |
| 421 | 422 | 442 |
| 422 | 443 | 442 |
| 422 | 423 | 443 |
| 423 | 444 | 443 |
| 423 | 424 | 444 |
| 424 | 445 | 444 |
| 424 | 425 | 445 |
| 425 | 446 | 445 |
| 425 | 426 | 446 |
| 426 | 447 | 446 |
| 426 | 427 | 447 |
| 427 | 448 | 447 |
| 427 | 428 | 448 |
| 428 | 449 | 448 |
| 428 | 429 | 449 |
| 429 | 450 | 449 |
| 429 | 430 | 450 |
| 430 | 451 | 450 |
| 430 | 431 | 451 |
| 431 | 452 | 451 |

|     |     |     |
|-----|-----|-----|
| 431 | 432 | 452 |
| 432 | 453 | 452 |
| 432 | 433 | 453 |
| 433 | 454 | 453 |
| 433 | 434 | 454 |
| 434 | 455 | 454 |
| 434 | 435 | 455 |
| 435 | 456 | 455 |
| 435 | 436 | 456 |
| 436 | 457 | 456 |
| 436 | 437 | 457 |
| 437 | 458 | 457 |
| 437 | 438 | 458 |
| 438 | 459 | 458 |
| 438 | 439 | 459 |
| 439 | 460 | 459 |
| 439 | 440 | 460 |
| 440 | 461 | 460 |
| 440 | 441 | 461 |
| 441 | 462 | 461 |
| 442 | 443 | 463 |
| 443 | 464 | 463 |
| 443 | 444 | 464 |
| 444 | 465 | 464 |
| 444 | 445 | 465 |
| 445 | 466 | 465 |

|     |     |     |
|-----|-----|-----|
| 445 | 446 | 466 |
| 446 | 467 | 466 |
| 446 | 447 | 467 |
| 447 | 468 | 467 |
| 447 | 448 | 468 |
| 448 | 469 | 468 |
| 448 | 449 | 469 |
| 449 | 470 | 469 |
| 449 | 450 | 470 |
| 450 | 471 | 470 |
| 450 | 451 | 471 |
| 451 | 472 | 471 |
| 451 | 452 | 472 |
| 452 | 473 | 472 |
| 452 | 453 | 473 |
| 453 | 474 | 473 |
| 453 | 454 | 474 |
| 454 | 475 | 474 |
| 454 | 455 | 475 |
| 455 | 476 | 475 |
| 455 | 456 | 476 |
| 456 | 477 | 476 |
| 456 | 457 | 477 |
| 457 | 478 | 477 |
| 457 | 458 | 478 |
| 458 | 479 | 478 |

|     |     |     |
|-----|-----|-----|
| 458 | 459 | 479 |
| 459 | 480 | 479 |
| 459 | 460 | 480 |
| 460 | 481 | 480 |
| 460 | 461 | 481 |
| 461 | 482 | 481 |
| 461 | 462 | 482 |
| 462 | 483 | 482 |
| 463 | 464 | 484 |
| 464 | 485 | 484 |
| 464 | 465 | 485 |
| 465 | 486 | 485 |
| 465 | 466 | 486 |
| 466 | 487 | 486 |
| 466 | 467 | 487 |
| 467 | 488 | 487 |
| 467 | 468 | 488 |
| 468 | 489 | 488 |
| 468 | 469 | 489 |
| 469 | 490 | 489 |
| 469 | 470 | 490 |
| 470 | 491 | 490 |
| 470 | 471 | 491 |
| 471 | 492 | 491 |
| 471 | 472 | 492 |
| 472 | 493 | 492 |

|     |     |     |
|-----|-----|-----|
| 472 | 473 | 493 |
| 473 | 494 | 493 |
| 473 | 474 | 494 |
| 474 | 495 | 494 |
| 474 | 475 | 495 |
| 475 | 496 | 495 |
| 475 | 476 | 496 |
| 476 | 497 | 496 |
| 476 | 477 | 497 |
| 477 | 498 | 497 |
| 477 | 478 | 498 |
| 478 | 499 | 498 |
| 478 | 479 | 499 |
| 479 | 500 | 499 |
| 479 | 480 | 500 |
| 480 | 501 | 500 |
| 480 | 481 | 501 |
| 481 | 502 | 501 |
| 481 | 482 | 502 |
| 482 | 503 | 502 |
| 482 | 483 | 503 |
| 483 | 504 | 503 |
| 484 | 485 | 505 |
| 485 | 506 | 505 |
| 485 | 486 | 506 |
| 486 | 507 | 506 |

|     |     |     |
|-----|-----|-----|
| 486 | 487 | 507 |
| 487 | 508 | 507 |
| 487 | 488 | 508 |
| 488 | 509 | 508 |
| 488 | 489 | 509 |
| 489 | 510 | 509 |
| 489 | 490 | 510 |
| 490 | 511 | 510 |
| 490 | 491 | 511 |
| 491 | 512 | 511 |
| 491 | 492 | 512 |
| 492 | 513 | 512 |
| 492 | 493 | 513 |
| 493 | 514 | 513 |
| 493 | 494 | 514 |
| 494 | 515 | 514 |
| 494 | 495 | 515 |
| 495 | 516 | 515 |
| 495 | 496 | 516 |
| 496 | 517 | 516 |
| 496 | 497 | 517 |
| 497 | 518 | 517 |
| 497 | 498 | 518 |
| 498 | 519 | 518 |
| 498 | 499 | 519 |
| 499 | 520 | 519 |

|     |     |     |
|-----|-----|-----|
| 499 | 500 | 520 |
| 500 | 521 | 520 |
| 500 | 501 | 521 |
| 501 | 522 | 521 |
| 501 | 502 | 522 |
| 502 | 523 | 522 |
| 502 | 503 | 523 |
| 503 | 524 | 523 |
| 503 | 504 | 524 |
| 504 | 525 | 524 |
| 505 | 506 | 526 |
| 506 | 527 | 526 |
| 506 | 507 | 527 |
| 507 | 528 | 527 |
| 507 | 508 | 528 |
| 508 | 529 | 528 |
| 508 | 509 | 529 |
| 509 | 530 | 529 |
| 509 | 510 | 530 |
| 510 | 531 | 530 |
| 510 | 511 | 531 |
| 511 | 532 | 531 |
| 511 | 512 | 532 |
| 512 | 533 | 532 |
| 512 | 513 | 533 |
| 513 | 534 | 533 |



|     |     |     |
|-----|-----|-----|
| 513 | 514 | 534 |
| 514 | 535 | 534 |
| 514 | 515 | 535 |
| 515 | 536 | 535 |
| 515 | 516 | 536 |
| 516 | 537 | 536 |
| 516 | 517 | 537 |
| 517 | 538 | 537 |
| 517 | 518 | 538 |
| 518 | 539 | 538 |
| 518 | 519 | 539 |
| 519 | 540 | 539 |
| 519 | 520 | 540 |
| 520 | 541 | 540 |
| 520 | 521 | 541 |
| 521 | 542 | 541 |
| 521 | 522 | 542 |
| 522 | 543 | 542 |
| 522 | 523 | 543 |
| 523 | 544 | 543 |
| 523 | 524 | 544 |
| 524 | 545 | 544 |
| 524 | 525 | 545 |
| 525 | 546 | 545 |
| 526 | 527 | 547 |
| 527 | 548 | 547 |

|     |     |     |
|-----|-----|-----|
| 527 | 528 | 548 |
| 528 | 549 | 548 |
| 528 | 529 | 549 |
| 529 | 550 | 549 |
| 529 | 530 | 550 |
| 530 | 551 | 550 |
| 530 | 531 | 551 |
| 531 | 552 | 551 |
| 531 | 532 | 552 |
| 532 | 553 | 552 |
| 532 | 533 | 553 |
| 533 | 554 | 553 |
| 533 | 534 | 554 |
| 534 | 555 | 554 |
| 534 | 535 | 555 |
| 535 | 556 | 555 |
| 535 | 536 | 556 |
| 536 | 557 | 556 |
| 536 | 537 | 557 |
| 537 | 558 | 557 |
| 537 | 538 | 558 |
| 538 | 559 | 558 |
| 538 | 539 | 559 |
| 539 | 560 | 559 |
| 539 | 540 | 560 |
| 540 | 561 | 560 |

|     |     |     |
|-----|-----|-----|
| 540 | 541 | 561 |
| 541 | 562 | 561 |
| 541 | 542 | 562 |
| 542 | 563 | 562 |
| 542 | 543 | 563 |
| 543 | 564 | 563 |
| 543 | 544 | 564 |
| 544 | 565 | 564 |
| 544 | 545 | 565 |
| 545 | 566 | 565 |
| 545 | 546 | 566 |
| 546 | 567 | 566 |
| 547 | 548 | 568 |
| 548 | 569 | 568 |
| 548 | 549 | 569 |
| 549 | 570 | 569 |
| 549 | 550 | 570 |
| 550 | 571 | 570 |
| 550 | 551 | 571 |
| 551 | 572 | 571 |
| 551 | 552 | 572 |
| 552 | 573 | 572 |
| 552 | 553 | 573 |
| 553 | 574 | 573 |
| 553 | 554 | 574 |
| 554 | 575 | 574 |

|     |     |     |
|-----|-----|-----|
| 554 | 555 | 575 |
| 555 | 576 | 575 |
| 555 | 556 | 576 |
| 556 | 577 | 576 |
| 556 | 557 | 577 |
| 557 | 578 | 577 |
| 557 | 558 | 578 |
| 558 | 579 | 578 |
| 558 | 559 | 579 |
| 559 | 580 | 579 |
| 559 | 560 | 580 |
| 560 | 581 | 580 |
| 560 | 561 | 581 |
| 561 | 582 | 581 |
| 561 | 562 | 582 |
| 562 | 583 | 582 |
| 562 | 563 | 583 |
| 563 | 584 | 583 |
| 563 | 564 | 584 |
| 564 | 585 | 584 |
| 564 | 565 | 585 |
| 565 | 586 | 585 |
| 565 | 566 | 586 |
| 566 | 587 | 586 |
| 566 | 567 | 587 |
| 567 | 588 | 587 |

|     |     |     |
|-----|-----|-----|
| 568 | 569 | 589 |
| 569 | 590 | 589 |
| 569 | 570 | 590 |
| 570 | 591 | 590 |
| 570 | 571 | 591 |
| 571 | 592 | 591 |
| 571 | 572 | 592 |
| 572 | 593 | 592 |
| 572 | 573 | 593 |
| 573 | 594 | 593 |
| 573 | 574 | 594 |
| 574 | 595 | 594 |
| 574 | 575 | 595 |
| 575 | 596 | 595 |
| 575 | 576 | 596 |
| 576 | 597 | 596 |
| 576 | 577 | 597 |
| 577 | 598 | 597 |
| 577 | 578 | 598 |
| 578 | 599 | 598 |
| 578 | 579 | 599 |
| 579 | 600 | 599 |
| 579 | 580 | 600 |
| 580 | 601 | 600 |
| 580 | 581 | 601 |
| 581 | 602 | 601 |

|     |     |     |
|-----|-----|-----|
| 581 | 582 | 602 |
| 582 | 603 | 602 |
| 582 | 583 | 603 |
| 583 | 604 | 603 |
| 583 | 584 | 604 |
| 584 | 605 | 604 |
| 584 | 585 | 605 |
| 585 | 606 | 605 |
| 585 | 586 | 606 |
| 586 | 607 | 606 |
| 586 | 587 | 607 |
| 587 | 608 | 607 |
| 587 | 588 | 608 |
| 588 | 609 | 608 |
| 589 | 590 | 610 |
| 590 | 611 | 610 |
| 590 | 591 | 611 |
| 591 | 612 | 611 |
| 591 | 592 | 612 |
| 592 | 613 | 612 |
| 592 | 593 | 613 |
| 593 | 614 | 613 |
| 593 | 594 | 614 |
| 594 | 615 | 614 |
| 594 | 595 | 615 |
| 595 | 616 | 615 |

|     |     |     |
|-----|-----|-----|
| 595 | 596 | 616 |
| 596 | 617 | 616 |
| 596 | 597 | 617 |
| 597 | 618 | 617 |
| 597 | 598 | 618 |
| 598 | 619 | 618 |
| 598 | 599 | 619 |
| 599 | 620 | 619 |
| 599 | 600 | 620 |
| 600 | 621 | 620 |
| 600 | 601 | 621 |
| 601 | 622 | 621 |
| 601 | 602 | 622 |
| 602 | 623 | 622 |
| 602 | 603 | 623 |
| 603 | 624 | 623 |
| 603 | 604 | 624 |
| 604 | 625 | 624 |
| 604 | 605 | 625 |
| 605 | 626 | 625 |
| 605 | 606 | 626 |
| 606 | 627 | 626 |
| 606 | 607 | 627 |
| 607 | 628 | 627 |
| 607 | 608 | 628 |
| 608 | 629 | 628 |

|     |     |     |
|-----|-----|-----|
| 608 | 609 | 629 |
| 609 | 630 | 629 |
| 610 | 611 | 631 |
| 611 | 632 | 631 |
| 611 | 612 | 632 |
| 612 | 633 | 632 |
| 612 | 613 | 633 |
| 613 | 634 | 633 |
| 613 | 614 | 634 |
| 614 | 635 | 634 |
| 614 | 615 | 635 |
| 615 | 636 | 635 |
| 615 | 616 | 636 |
| 616 | 637 | 636 |
| 616 | 617 | 637 |
| 617 | 638 | 637 |
| 617 | 618 | 638 |
| 618 | 639 | 638 |
| 618 | 619 | 639 |
| 619 | 640 | 639 |
| 619 | 620 | 640 |
| 620 | 641 | 640 |
| 620 | 621 | 641 |
| 621 | 642 | 641 |
| 621 | 622 | 642 |
| 622 | 643 | 642 |



|     |     |     |
|-----|-----|-----|
| 622 | 623 | 643 |
| 623 | 644 | 643 |
| 623 | 624 | 644 |
| 624 | 645 | 644 |
| 624 | 625 | 645 |
| 625 | 646 | 645 |
| 625 | 626 | 646 |
| 626 | 647 | 646 |
| 626 | 627 | 647 |
| 627 | 648 | 647 |
| 627 | 628 | 648 |
| 628 | 649 | 648 |
| 628 | 629 | 649 |
| 629 | 650 | 649 |
| 629 | 630 | 650 |
| 630 | 651 | 650 |
| 631 | 632 | 652 |
| 632 | 653 | 652 |
| 632 | 633 | 653 |
| 633 | 654 | 653 |
| 633 | 634 | 654 |
| 634 | 655 | 654 |
| 634 | 635 | 655 |
| 635 | 656 | 655 |
| 635 | 636 | 656 |
| 636 | 657 | 656 |

|     |     |     |
|-----|-----|-----|
| 636 | 637 | 657 |
| 637 | 658 | 657 |
| 637 | 638 | 658 |
| 638 | 659 | 658 |
| 638 | 639 | 659 |
| 639 | 660 | 659 |
| 639 | 640 | 660 |
| 640 | 661 | 660 |
| 640 | 641 | 661 |
| 641 | 662 | 661 |
| 641 | 642 | 662 |
| 642 | 663 | 662 |
| 642 | 643 | 663 |
| 643 | 664 | 663 |
| 643 | 644 | 664 |
| 644 | 665 | 664 |
| 644 | 645 | 665 |
| 645 | 666 | 665 |
| 645 | 646 | 666 |
| 646 | 667 | 666 |
| 646 | 647 | 667 |
| 647 | 668 | 667 |
| 647 | 648 | 668 |
| 648 | 669 | 668 |
| 648 | 649 | 669 |
| 649 | 670 | 669 |

|     |     |     |
|-----|-----|-----|
| 649 | 650 | 670 |
| 650 | 671 | 670 |
| 650 | 651 | 671 |
| 651 | 672 | 671 |
| 652 | 653 | 673 |
| 653 | 674 | 673 |
| 653 | 654 | 674 |
| 654 | 675 | 674 |
| 654 | 655 | 675 |
| 655 | 676 | 675 |
| 655 | 656 | 676 |
| 656 | 677 | 676 |
| 656 | 657 | 677 |
| 657 | 678 | 677 |
| 657 | 658 | 678 |
| 658 | 679 | 678 |
| 658 | 659 | 679 |
| 659 | 680 | 679 |
| 659 | 660 | 680 |
| 660 | 681 | 680 |
| 660 | 661 | 681 |
| 661 | 682 | 681 |
| 661 | 662 | 682 |
| 662 | 683 | 682 |
| 662 | 663 | 683 |
| 663 | 684 | 683 |

|     |     |     |
|-----|-----|-----|
| 663 | 664 | 684 |
| 664 | 685 | 684 |
| 664 | 665 | 685 |
| 665 | 686 | 685 |
| 665 | 666 | 686 |
| 666 | 687 | 686 |
| 666 | 667 | 687 |
| 667 | 688 | 687 |
| 667 | 668 | 688 |
| 668 | 689 | 688 |
| 668 | 669 | 689 |
| 669 | 690 | 689 |
| 669 | 670 | 690 |
| 670 | 691 | 690 |
| 670 | 671 | 691 |
| 671 | 692 | 691 |
| 671 | 672 | 692 |
| 672 | 693 | 692 |
| 673 | 674 | 694 |
| 674 | 695 | 694 |
| 674 | 675 | 695 |
| 675 | 696 | 695 |
| 675 | 676 | 696 |
| 676 | 697 | 696 |
| 676 | 677 | 697 |
| 677 | 698 | 697 |

|     |     |     |
|-----|-----|-----|
| 677 | 678 | 698 |
| 678 | 699 | 698 |
| 678 | 679 | 699 |
| 679 | 700 | 699 |
| 679 | 680 | 700 |
| 680 | 701 | 700 |
| 680 | 681 | 701 |
| 681 | 702 | 701 |
| 681 | 682 | 702 |
| 682 | 703 | 702 |
| 682 | 683 | 703 |
| 683 | 704 | 703 |
| 683 | 684 | 704 |
| 684 | 705 | 704 |
| 684 | 685 | 705 |
| 685 | 706 | 705 |
| 685 | 686 | 706 |
| 686 | 707 | 706 |
| 686 | 687 | 707 |
| 687 | 708 | 707 |
| 687 | 688 | 708 |
| 688 | 709 | 708 |
| 688 | 689 | 709 |
| 689 | 710 | 709 |
| 689 | 690 | 710 |
| 690 | 711 | 710 |

|     |     |     |
|-----|-----|-----|
| 690 | 691 | 711 |
| 691 | 712 | 711 |
| 691 | 692 | 712 |
| 692 | 713 | 712 |
| 692 | 693 | 713 |
| 693 | 714 | 713 |
| 694 | 695 | 715 |
| 695 | 716 | 715 |
| 695 | 696 | 716 |
| 696 | 717 | 716 |
| 696 | 697 | 717 |
| 697 | 718 | 717 |
| 697 | 698 | 718 |
| 698 | 719 | 718 |
| 698 | 699 | 719 |
| 699 | 720 | 719 |
| 699 | 700 | 720 |
| 700 | 721 | 720 |
| 700 | 701 | 721 |
| 701 | 722 | 721 |
| 701 | 702 | 722 |
| 702 | 723 | 722 |
| 702 | 703 | 723 |
| 703 | 724 | 723 |
| 703 | 704 | 724 |
| 704 | 725 | 724 |

|     |     |     |
|-----|-----|-----|
| 704 | 705 | 725 |
| 705 | 726 | 725 |
| 705 | 706 | 726 |
| 706 | 727 | 726 |
| 706 | 707 | 727 |
| 707 | 728 | 727 |
| 707 | 708 | 728 |
| 708 | 729 | 728 |
| 708 | 709 | 729 |
| 709 | 730 | 729 |
| 709 | 710 | 730 |
| 710 | 731 | 730 |
| 710 | 711 | 731 |
| 711 | 732 | 731 |
| 711 | 712 | 732 |
| 712 | 733 | 732 |
| 712 | 713 | 733 |
| 713 | 734 | 733 |
| 713 | 714 | 734 |
| 714 | 735 | 734 |
| 715 | 716 | 736 |
| 716 | 737 | 736 |
| 716 | 717 | 737 |
| 717 | 738 | 737 |
| 717 | 718 | 738 |
| 718 | 739 | 738 |

|     |     |     |
|-----|-----|-----|
| 718 | 719 | 739 |
| 719 | 740 | 739 |
| 719 | 720 | 740 |
| 720 | 741 | 740 |
| 720 | 721 | 741 |
| 721 | 742 | 741 |
| 721 | 722 | 742 |
| 722 | 743 | 742 |
| 722 | 723 | 743 |
| 723 | 744 | 743 |
| 723 | 724 | 744 |
| 724 | 745 | 744 |
| 724 | 725 | 745 |
| 725 | 746 | 745 |
| 725 | 726 | 746 |
| 726 | 747 | 746 |
| 726 | 727 | 747 |
| 727 | 748 | 747 |
| 727 | 728 | 748 |
| 728 | 749 | 748 |
| 728 | 729 | 749 |
| 729 | 750 | 749 |
| 729 | 730 | 750 |
| 730 | 751 | 750 |
| 730 | 731 | 751 |
| 731 | 752 | 751 |



|     |     |     |
|-----|-----|-----|
| 731 | 732 | 752 |
| 732 | 753 | 752 |
| 732 | 733 | 753 |
| 733 | 754 | 753 |
| 733 | 734 | 754 |
| 734 | 755 | 754 |
| 734 | 735 | 755 |
| 735 | 756 | 755 |
| 736 | 737 | 757 |
| 737 | 758 | 757 |
| 737 | 738 | 758 |
| 738 | 759 | 758 |
| 738 | 739 | 759 |
| 739 | 760 | 759 |
| 739 | 740 | 760 |
| 740 | 761 | 760 |
| 740 | 741 | 761 |
| 741 | 762 | 761 |
| 741 | 742 | 762 |
| 742 | 763 | 762 |
| 742 | 743 | 763 |
| 743 | 764 | 763 |
| 743 | 744 | 764 |
| 744 | 765 | 764 |
| 744 | 745 | 765 |
| 745 | 766 | 765 |

|     |     |     |
|-----|-----|-----|
| 745 | 746 | 766 |
| 746 | 767 | 766 |
| 746 | 747 | 767 |
| 747 | 768 | 767 |
| 747 | 748 | 768 |
| 748 | 769 | 768 |
| 748 | 749 | 769 |
| 749 | 770 | 769 |
| 749 | 750 | 770 |
| 750 | 771 | 770 |
| 750 | 751 | 771 |
| 751 | 772 | 771 |
| 751 | 752 | 772 |
| 752 | 773 | 772 |
| 752 | 753 | 773 |
| 753 | 774 | 773 |
| 753 | 754 | 774 |
| 754 | 775 | 774 |
| 754 | 755 | 775 |
| 755 | 776 | 775 |
| 755 | 756 | 776 |
| 756 | 777 | 776 |
| 757 | 758 | 778 |
| 758 | 779 | 778 |
| 758 | 759 | 779 |
| 759 | 780 | 779 |

|     |     |     |
|-----|-----|-----|
| 759 | 760 | 780 |
| 760 | 781 | 780 |
| 760 | 761 | 781 |
| 761 | 782 | 781 |
| 761 | 762 | 782 |
| 762 | 783 | 782 |
| 762 | 763 | 783 |
| 763 | 784 | 783 |
| 763 | 764 | 784 |
| 764 | 785 | 784 |
| 764 | 765 | 785 |
| 765 | 786 | 785 |
| 765 | 766 | 786 |
| 766 | 787 | 786 |
| 766 | 767 | 787 |
| 767 | 788 | 787 |
| 767 | 768 | 788 |
| 768 | 789 | 788 |
| 768 | 769 | 789 |
| 769 | 790 | 789 |
| 769 | 770 | 790 |
| 770 | 791 | 790 |
| 770 | 771 | 791 |
| 771 | 792 | 791 |
| 771 | 772 | 792 |
| 772 | 793 | 792 |

|     |     |     |
|-----|-----|-----|
| 772 | 773 | 793 |
| 773 | 794 | 793 |
| 773 | 774 | 794 |
| 774 | 795 | 794 |
| 774 | 775 | 795 |
| 775 | 796 | 795 |
| 775 | 776 | 796 |
| 776 | 797 | 796 |
| 776 | 777 | 797 |
| 777 | 798 | 797 |
| 778 | 779 | 799 |
| 779 | 800 | 799 |
| 779 | 780 | 800 |
| 780 | 801 | 800 |
| 780 | 781 | 801 |
| 781 | 802 | 801 |
| 781 | 782 | 802 |
| 782 | 803 | 802 |
| 782 | 783 | 803 |
| 783 | 804 | 803 |
| 783 | 784 | 804 |
| 784 | 805 | 804 |
| 784 | 785 | 805 |
| 785 | 806 | 805 |
| 785 | 786 | 806 |
| 786 | 807 | 806 |

|     |     |     |
|-----|-----|-----|
| 786 | 787 | 807 |
| 787 | 808 | 807 |
| 787 | 788 | 808 |
| 788 | 809 | 808 |
| 788 | 789 | 809 |
| 789 | 810 | 809 |
| 789 | 790 | 810 |
| 790 | 811 | 810 |
| 790 | 791 | 811 |
| 791 | 812 | 811 |
| 791 | 792 | 812 |
| 792 | 813 | 812 |
| 792 | 793 | 813 |
| 793 | 814 | 813 |
| 793 | 794 | 814 |
| 794 | 815 | 814 |
| 794 | 795 | 815 |
| 795 | 816 | 815 |
| 795 | 796 | 816 |
| 796 | 817 | 816 |
| 796 | 797 | 817 |
| 797 | 818 | 817 |
| 797 | 798 | 818 |
| 798 | 819 | 818 |
| 799 | 800 | 820 |
| 800 | 821 | 820 |

|     |     |     |
|-----|-----|-----|
| 800 | 801 | 821 |
| 801 | 822 | 821 |
| 801 | 802 | 822 |
| 802 | 823 | 822 |
| 802 | 803 | 823 |
| 803 | 824 | 823 |
| 803 | 804 | 824 |
| 804 | 825 | 824 |
| 804 | 805 | 825 |
| 805 | 826 | 825 |
| 805 | 806 | 826 |
| 806 | 827 | 826 |
| 806 | 807 | 827 |
| 807 | 828 | 827 |
| 807 | 808 | 828 |
| 808 | 829 | 828 |
| 808 | 809 | 829 |
| 809 | 830 | 829 |
| 809 | 810 | 830 |
| 810 | 831 | 830 |
| 810 | 811 | 831 |
| 811 | 832 | 831 |
| 811 | 812 | 832 |
| 812 | 833 | 832 |
| 812 | 813 | 833 |
| 813 | 834 | 833 |

|     |     |     |
|-----|-----|-----|
| 813 | 814 | 834 |
| 814 | 835 | 834 |
| 814 | 815 | 835 |
| 815 | 836 | 835 |
| 815 | 816 | 836 |
| 816 | 837 | 836 |
| 816 | 817 | 837 |
| 817 | 838 | 837 |
| 817 | 818 | 838 |
| 818 | 839 | 838 |
| 818 | 819 | 839 |
| 819 | 840 | 839 |
| 820 | 821 | 1   |
| 821 | 2   | 1   |
| 821 | 822 | 2   |
| 822 | 3   | 2   |
| 822 | 823 | 3   |
| 823 | 4   | 3   |
| 823 | 824 | 4   |
| 824 | 5   | 4   |
| 824 | 825 | 5   |
| 825 | 6   | 5   |
| 825 | 826 | 6   |
| 826 | 7   | 6   |
| 826 | 827 | 7   |
| 827 | 8   | 7   |

|     |     |    |
|-----|-----|----|
| 827 | 828 | 8  |
| 828 | 9   | 8  |
| 828 | 829 | 9  |
| 829 | 10  | 9  |
| 829 | 830 | 10 |
| 830 | 11  | 10 |
| 830 | 831 | 11 |
| 831 | 12  | 11 |
| 831 | 832 | 12 |
| 832 | 13  | 12 |
| 832 | 833 | 13 |
| 833 | 14  | 13 |
| 833 | 834 | 14 |
| 834 | 15  | 14 |
| 834 | 835 | 15 |
| 835 | 16  | 15 |
| 835 | 836 | 16 |
| 836 | 17  | 16 |
| 836 | 837 | 17 |
| 837 | 18  | 17 |
| 837 | 838 | 18 |
| 838 | 19  | 18 |
| 838 | 839 | 19 |
| 839 | 20  | 19 |
| 839 | 840 | 20 |
| 840 | 21  | 20 |



## Experimental data

Internal temperature field of surrounding rocks

(a)

| Distance (m) | Scheme 1 | Scheme 2 | Scheme 3 |
|--------------|----------|----------|----------|
| 0            | 17.43665 | 14.16832 | 10.07793 |
| 0.025        | 19.65992 | 19.29130 | 19.43087 |
| 0.05         | 20.41999 | 20.46392 | 20.49664 |
| 0.075        | 20.49310 | 20.49971 | 20.49567 |
| 0.1          | 20.47972 | 20.41523 | 20.46467 |
| 0.125        | 20.46461 | 20.41656 | 20.43034 |
| 0.15         | 20.46461 | 20.43853 | 20.52633 |
| 0.175        | 20.47561 | 20.37952 | 20.41105 |
| 0.2          | 20.45635 | 20.32041 | 20.34787 |
| 0.225        | 20.46184 | 20.37812 | 20.31225 |
| 0.25         | 20.45775 | 20.33690 | 20.34653 |
| 0.275        | 20.46324 | 20.30537 | 20.32596 |
| 0.3          | 20.47694 | 20.34381 | 20.37681 |

(b)

| Distance (m) | Scheme 1 | Scheme 2 | Scheme 3 |
|--------------|----------|----------|----------|
| 0            | 15.46824 | 11.44898 | 7.94725  |
| 0.025        | 17.70168 | 15.97912 | 15.21722 |
| 0.05         | 19.30528 | 18.98061 | 19.35507 |
| 0.075        | 20.40023 | 20.37179 | 20.40421 |
| 0.1          | 19.96800 | 19.99634 | 20.28615 |
| 0.125        | 20.32393 | 20.39715 | 20.48085 |
| 0.15         | 20.46143 | 20.48994 | 20.49559 |
| 0.175        | 20.48473 | 20.49778 | 20.49570 |
| 0.2          | 20.49407 | 20.49949 | 20.48880 |
| 0.225        | 20.49708 | 20.49972 | 20.47542 |
| 0.25         | 20.49782 | 20.49637 | 20.46031 |
| 0.275        | 20.49794 | 20.49539 | 20.46031 |
| 0.3          | 20.49636 | 20.46440 | 20.47131 |

(c)

| Distance (m) | Scheme 1 | Scheme 2 | Scheme 3 |
|--------------|----------|----------|----------|
| 0            | 14.59220 | 10.49165 | 7.36199  |
| 0.025        | 16.70282 | 14.49384 | 13.44419 |
| 0.05         | 18.40973 | 17.61954 | 17.85874 |
| 0.075        | 19.27650 | 19.06425 | 19.52907 |
| 0.1          | 19.61701 | 19.57338 | 19.99495 |
| 0.125        | 19.89333 | 19.94627 | 20.26952 |
| 0.15         | 20.26256 | 20.35354 | 20.46928 |
| 0.175        | 20.36792 | 20.43798 | 20.48960 |

|       |          |          |          |
|-------|----------|----------|----------|
| 0.2   | 20.43322 | 20.47777 | 20.49476 |
| 0.225 | 20.46953 | 20.49344 | 20.49563 |
| 0.25  | 20.48726 | 20.49966 | 20.49434 |
| 0.275 | 20.49462 | 20.49837 | 20.49551 |
| 0.3   | 20.49714 | 20.49972 | 20.49569 |

(d)

| Distance (m) | Scheme 1 | Scheme 2 | Scheme 3 |
|--------------|----------|----------|----------|
| 0            | 13.30844 | 9.30459  | 6.71845  |
| 0.025        | 15.17960 | 12.52291 | 11.27066 |
| 0.05         | 16.83140 | 15.34173 | 15.17228 |
| 0.075        | 17.80394 | 16.95857 | 17.27420 |
| 0.1          | 18.24530 | 17.66929 | 18.13241 |
| 0.125        | 19.02244 | 18.85779 | 19.41266 |
| 0.15         | 19.35148 | 19.32335 | 19.83453 |
| 0.175        | 19.63691 | 19.69927 | 20.12625 |
| 0.2          | 19.87686 | 19.98770 | 20.31026 |
| 0.225        | 20.07105 | 20.19563 | 20.41401 |
| 0.25         | 20.22118 | 20.33462 | 20.46504 |
| 0.275        | 20.33126 | 20.41957 | 20.48628 |
| 0.3          | 20.40770 | 20.46678 | 20.49349 |

Variation law of temperature gradient

| Distance (m) | Scheme 1 | Scheme 2  | Scheme 3  |
|--------------|----------|-----------|-----------|
| 0.025        | 66.82348 | 114.57976 | 160.68794 |

|       |          |          |           |
|-------|----------|----------|-----------|
| 0.05  | 46.78117 | 79.15213 | 107.37681 |
| 0.075 | 34.46747 | 56.69870 | 72.07029  |
| 0.1   | 25.94254 | 40.85235 | 47.09834  |
| 0.125 | 19.74062 | 29.32162 | 29.73800  |
| 0.15  | 14.83761 | 20.42208 | 17.60362  |
| 0.175 | 11.01432 | 13.78773 | 9.70205   |
| 0.2   | 8.25865  | 9.32886  | 5.29334   |
| 0.225 | 6.09889  | 6.11105  | 2.69620   |
| 0.25  | 4.32478  | 3.75116  | 1.22861   |
| 0.275 | 3.04086  | 2.25145  | 0.53085   |

Comparison of the variation laws for wall temperature

| Time (h) | Scheme 1 | Scheme 2 | Scheme 3 |
|----------|----------|----------|----------|
| 0        | 20.38982 | 20.37323 | 20.51520 |
| 0.06667  | 17.78347 | 14.80992 | 10.90191 |
| 0.13333  | 17.04454 | 13.60213 | 9.73251  |
| 0.2      | 16.55206 | 12.87436 | 9.12323  |
| 0.26667  | 16.21989 | 12.41576 | 8.77079  |
| 0.33333  | 15.94240 | 12.05111 | 8.50592  |
| 0.4      | 15.72399 | 11.77569 | 8.31441  |
| 0.46667  | 15.50420 | 11.50804 | 8.13466  |
| 0.53333  | 15.34676 | 11.32226 | 8.01357  |
| 0.6      | 15.18924 | 11.14092 | 7.89792  |
| 0.66667  | 15.06337 | 10.99934 | 7.80945  |

|         |          |          |         |
|---------|----------|----------|---------|
| 0.73333 | 14.90645 | 10.82687 | 7.70376 |
| 0.8     | 14.81259 | 10.72562 | 7.64263 |
| 0.86667 | 14.71906 | 10.62640 | 7.58352 |
| 0.93333 | 14.62590 | 10.52906 | 7.52621 |
| 1       | 14.50221 | 10.40165 | 7.45197 |
| 1.06667 | 14.47146 | 10.37049 | 7.43403 |
| 1.13333 | 14.37942 | 10.27779 | 7.38092 |
| 1.2     | 14.28798 | 10.18714 | 7.32956 |
| 1.26667 | 14.22732 | 10.12767 | 7.29612 |
| 1.33333 | 14.16692 | 10.06900 | 7.26335 |
| 1.4     | 14.10680 | 10.01115 | 7.23124 |
| 1.46667 | 14.04699 | 9.95411  | 7.19979 |
| 1.53333 | 13.98747 | 9.89787  | 7.16894 |
| 1.6     | 13.95778 | 9.86996  | 7.15369 |
| 1.66667 | 13.89874 | 9.81492  | 7.12378 |
| 1.73333 | 13.86938 | 9.78780  | 7.10913 |
| 1.8     | 13.81084 | 9.73396  | 7.08012 |
| 1.86667 | 13.75264 | 9.68090  | 7.05170 |
| 1.93333 | 13.72363 | 9.65456  | 7.03763 |
| 2       | 13.66596 | 9.60267  | 7.01006 |
| 2.06667 | 13.63732 | 9.57711  | 6.99654 |
| 2.13333 | 13.60867 | 9.55155  | 6.98303 |
| 2.2     | 13.58020 | 9.52636  | 6.96980 |
| 2.26667 | 13.52348 | 9.47638  | 6.94358 |
| 2.33333 | 13.52348 | 9.47638  | 6.94358 |
| 2.4     | 13.46712 | 9.42715  | 6.91789 |

|         |          |         |         |
|---------|----------|---------|---------|
| 2.46667 | 13.43905 | 9.40272 | 6.90518 |
| 2.53333 | 13.41117 | 9.37865 | 6.89272 |
| 2.6     | 13.38329 | 9.35459 | 6.88025 |
| 2.66667 | 13.35561 | 9.33090 | 6.86805 |
| 2.73333 | 13.32794 | 9.30721 | 6.85583 |

## Numerical results

Internal temperature field of surrounding rocks

(a)

| Distance (m) | Scheme 1 | Scheme 2 | Scheme 3 |
|--------------|----------|----------|----------|
| 0            | 17.43839 | 14.1685  | 10.08005 |
| 0.00698      | 18.35171 | 16.37905 | 14.40514 |
| 0.01467      | 19.0961  | 18.09989 | 17.57378 |
| 0.02312      | 19.66189 | 19.29155 | 19.43495 |
| 0.03241      | 20.054   | 19.99786 | 20.24284 |
| 0.04264      | 20.29504 | 20.33888 | 20.4703  |
| 0.05388      | 20.42203 | 20.46419 | 20.50095 |
| 0.06626      | 20.47688 | 20.49567 | 20.50031 |
| 0.07987      | 20.49515 | 20.49998 | 20.49997 |
| 0.09484      | 20.49941 | 20.50004 | 20.5     |
| 0.1113       | 20.49999 | 20.5     | 20.5     |
| 0.12942      | 20.50001 | 20.5     | 20.5     |
| 0.14934      | 20.5     | 20.5     | 20.5     |
| 0.17126      | 20.5     | 20.5     | 20.5     |

|         |      |      |      |
|---------|------|------|------|
| 0.19537 | 20.5 | 20.5 | 20.5 |
| 0.22189 | 20.5 | 20.5 | 20.5 |
| 0.25107 | 20.5 | 20.5 | 20.5 |
| 0.28316 | 20.5 | 20.5 | 20.5 |
| 0.31846 | 20.5 | 20.5 | 20.5 |
| 0.35729 | 20.5 | 20.5 | 20.5 |
| 0.4     | 20.5 | 20.5 | 20.5 |

(b)

| Distance (m) | Scheme 1 | Scheme 2 | Scheme 3 |
|--------------|----------|----------|----------|
| 0            | 15.46979 | 11.44913 | 7.94892  |
| 0.00698      | 16.2763  | 13.09711 | 10.62373 |
| 0.01467      | 17.02215 | 14.61346 | 13.07066 |
| 0.02312      | 17.70345 | 15.97933 | 15.22042 |
| 0.03241      | 18.31503 | 17.17388 | 17.00739 |
| 0.04264      | 18.85126 | 18.1783  | 18.38812 |
| 0.05388      | 19.30721 | 18.98086 | 19.35914 |
| 0.06626      | 19.67997 | 19.58183 | 19.96511 |
| 0.07987      | 19.97    | 19.9966  | 20.29041 |
| 0.09484      | 20.18217 | 20.25522 | 20.43483 |
| 0.1113       | 20.32596 | 20.39742 | 20.48515 |
| 0.12942      | 20.41469 | 20.46431 | 20.49787 |
| 0.14934      | 20.46348 | 20.49021 | 20.49989 |
| 0.17126      | 20.48678 | 20.49805 | 20.50001 |
| 0.19537      | 20.49612 | 20.49976 | 20.5     |
| 0.22189      | 20.49913 | 20.49999 | 20.5     |

|         |          |      |      |
|---------|----------|------|------|
| 0.25107 | 20.49987 | 20.5 | 20.5 |
| 0.28316 | 20.49999 | 20.5 | 20.5 |
| 0.31846 | 20.5     | 20.5 | 20.5 |
| 0.35729 | 20.5     | 20.5 | 20.5 |
| 0.4     | 20.5     | 20.5 | 20.5 |

(c)

| Distance (m) | Scheme 1 | Scheme 2 | Scheme 3 |
|--------------|----------|----------|----------|
| 0            | 14.59366 | 10.49179 | 7.36354  |
| 0.00698      | 15.33892 | 11.90805 | 9.52576  |
| 0.01467      | 16.04274 | 13.24419 | 11.56225 |
| 0.02312      | 16.70449 | 14.49403 | 13.44701 |
| 0.03241      | 17.32214 | 15.64807 | 15.14756 |
| 0.04264      | 17.89251 | 16.6943  | 16.62937 |
| 0.05388      | 18.41157 | 17.61977 | 17.86249 |
| 0.06626      | 18.87492 | 18.41259 | 18.82958 |
| 0.07987      | 19.27843 | 19.0645  | 19.53317 |
| 0.09484      | 19.61897 | 19.57363 | 19.99915 |
| 0.1113       | 19.89532 | 19.94653 | 20.27378 |
| 0.12942      | 20.10897 | 20.19887 | 20.41387 |
| 0.14934      | 20.26459 | 20.3538  | 20.47358 |
| 0.17126      | 20.36996 | 20.43825 | 20.4939  |
| 0.19537      | 20.43526 | 20.47804 | 20.49906 |
| 0.22189      | 20.47158 | 20.49371 | 20.49993 |
| 0.25107      | 20.48931 | 20.49864 | 20.5     |



|         |          |          |      |
|---------|----------|----------|------|
| 0.28316 | 20.49667 | 20.49981 | 20.5 |
| 0.31846 | 20.49919 | 20.49999 | 20.5 |
| 0.35729 | 20.49986 | 20.5     | 20.5 |
| 0.4     | 20.5     | 20.5     | 20.5 |

(d)

| Distance (m) | Scheme 1 | Scheme 2 | Scheme 3 |
|--------------|----------|----------|----------|
| 0            | 13.30977 | 9.30471  | 6.71986  |
| 0.00698      | 13.95942 | 10.4219  | 8.30188  |
| 0.01467      | 14.58261 | 11.49406 | 9.82     |
| 0.02312      | 15.18112 | 12.52307 | 11.27303 |
| 0.03241      | 15.75581 | 13.50889 | 12.6561  |
| 0.04264      | 16.30671 | 14.44969 | 13.96078 |
| 0.05388      | 16.83308 | 15.34193 | 15.17547 |
| 0.06626      | 17.33347 | 16.18046 | 16.28618 |
| 0.07987      | 17.80572 | 16.95879 | 17.27783 |
| 0.09484      | 18.24712 | 17.66952 | 18.13622 |
| 0.1113       | 18.65446 | 18.30495 | 18.85066 |
| 0.12942      | 19.02434 | 18.85804 | 19.41674 |
| 0.14934      | 19.35342 | 19.3236  | 19.8387  |
| 0.17126      | 19.63887 | 19.69953 | 20.13048 |
| 0.19537      | 19.87885 | 19.98796 | 20.31453 |
| 0.22189      | 20.07306 | 20.19589 | 20.4183  |
| 0.25107      | 20.2232  | 20.33488 | 20.46934 |
| 0.28316      | 20.33329 | 20.41984 | 20.49058 |

|         |          |          |          |
|---------|----------|----------|----------|
| 0.31846 | 20.40974 | 20.46705 | 20.49779 |
| 0.35729 | 20.46138 | 20.49244 | 20.49986 |
| 0.4     | 20.5     | 20.5     | 20.5     |

Comparison of the variation laws for wall temperature

| Time (h) | Scheme 1 | Scheme 2 | Scheme 3 |
|----------|----------|----------|----------|
| 0        | 20.48186 | 20.46349 | 20.42951 |
| 5.28E-05 | 20.46332 | 20.42585 | 20.35647 |
| 1.08E-04 | 20.44438 | 20.38706 | 20.28084 |
| 1.66E-04 | 20.42506 | 20.34713 | 20.20259 |
| 2.27E-04 | 20.40537 | 20.30605 | 20.12167 |
| 2.92E-04 | 20.38533 | 20.26382 | 20.03805 |
| 3.59E-04 | 20.36494 | 20.22046 | 19.9517  |
| 4.30E-04 | 20.34423 | 20.17597 | 19.86262 |
| 5.04E-04 | 20.3232  | 20.13036 | 19.77077 |
| 5.82E-04 | 20.30188 | 20.08364 | 19.67616 |
| 6.64E-04 | 20.28029 | 20.03585 | 19.57878 |
| 7.50E-04 | 20.25844 | 19.987   | 19.47865 |
| 8.40E-04 | 20.23635 | 19.93712 | 19.37578 |
| 9.35E-04 | 20.21403 | 19.88623 | 19.27021 |
| 0.00103  | 20.19152 | 19.83437 | 19.16195 |
| 0.00114  | 20.16881 | 19.78157 | 19.05107 |
| 0.00125  | 20.14594 | 19.72788 | 18.93762 |
| 0.00136  | 20.1229  | 19.67334 | 18.82167 |

|         |          |          |          |
|---------|----------|----------|----------|
| 0.00148 | 20.09973 | 19.61798 | 18.70329 |
| 0.00161 | 20.07643 | 19.56186 | 18.58258 |
| 0.00175 | 20.05301 | 19.50502 | 18.45965 |
| 0.00189 | 20.02948 | 19.44751 | 18.33459 |
| 0.00203 | 20.00586 | 19.38938 | 18.20755 |
| 0.00219 | 19.98213 | 19.33068 | 18.07865 |
| 0.00235 | 19.95831 | 19.27145 | 17.94804 |
| 0.00252 | 19.9344  | 19.21176 | 17.81588 |
| 0.0027  | 19.9104  | 19.15163 | 17.68233 |
| 0.00289 | 19.88629 | 19.09112 | 17.54756 |
| 0.00308 | 19.86208 | 19.03026 | 17.41175 |
| 0.00329 | 19.83776 | 18.9691  | 17.27509 |
| 0.00351 | 19.81331 | 18.90766 | 17.13777 |
| 0.00373 | 19.78872 | 18.84599 | 16.99997 |
| 0.00397 | 19.76399 | 18.78409 | 16.8619  |
| 0.00423 | 19.73909 | 18.72199 | 16.72374 |
| 0.00449 | 19.71401 | 18.65971 | 16.58568 |
| 0.00477 | 19.68873 | 18.59725 | 16.4479  |
| 0.00506 | 19.66323 | 18.53462 | 16.31059 |
| 0.00536 | 19.6375  | 18.47182 | 16.1739  |
| 0.00568 | 19.61152 | 18.40883 | 16.03799 |
| 0.00602 | 19.58528 | 18.34565 | 15.90302 |
| 0.00638 | 19.55874 | 18.28227 | 15.7691  |
| 0.00675 | 19.53191 | 18.21865 | 15.63635 |
| 0.00714 | 19.50476 | 18.15479 | 15.50487 |
| 0.00755 | 19.47727 | 18.09065 | 15.37474 |

|         |          |          |          |
|---------|----------|----------|----------|
| 0.00798 | 19.44944 | 18.02621 | 15.24602 |
| 0.00843 | 19.42124 | 17.96144 | 15.11876 |
| 0.0089  | 19.39267 | 17.89631 | 14.99298 |
| 0.0094  | 19.36371 | 17.8308  | 14.86868 |
| 0.00992 | 19.33435 | 17.76486 | 14.74587 |
| 0.01047 | 19.30458 | 17.69849 | 14.62451 |
| 0.01105 | 19.27439 | 17.63164 | 14.50458 |
| 0.01165 | 19.24376 | 17.5643  | 14.38602 |
| 0.01229 | 19.2127  | 17.49645 | 14.26878 |
| 0.01296 | 19.18119 | 17.42807 | 14.1528  |
| 0.01366 | 19.14922 | 17.35913 | 14.038   |
| 0.01439 | 19.11679 | 17.28963 | 13.92431 |
| 0.01517 | 19.08388 | 17.21955 | 13.81167 |
| 0.01598 | 19.05049 | 17.14889 | 13.7     |
| 0.01683 | 19.01661 | 17.07763 | 13.58923 |
| 0.01772 | 18.98224 | 17.00577 | 13.47931 |
| 0.01866 | 18.94736 | 16.93331 | 13.37018 |
| 0.01965 | 18.91198 | 16.86025 | 13.26178 |
| 0.02068 | 18.87608 | 16.78657 | 13.15408 |
| 0.02177 | 18.83966 | 16.7123  | 13.04705 |
| 0.02291 | 18.80272 | 16.63742 | 12.94065 |
| 0.02411 | 18.76525 | 16.56195 | 12.83487 |
| 0.02537 | 18.72724 | 16.48588 | 12.72969 |
| 0.02669 | 18.68869 | 16.40922 | 12.62512 |
| 0.02808 | 18.64961 | 16.33199 | 12.52115 |
| 0.02953 | 18.60997 | 16.25419 | 12.41779 |

|         |          |          |          |
|---------|----------|----------|----------|
| 0.03106 | 18.56978 | 16.17583 | 12.31504 |
| 0.03267 | 18.52904 | 16.09692 | 12.21292 |
| 0.03435 | 18.48775 | 16.01747 | 12.11144 |
| 0.03612 | 18.44589 | 15.9375  | 12.01063 |
| 0.03798 | 18.40348 | 15.85701 | 11.91049 |
| 0.03993 | 18.3605  | 15.77603 | 11.81105 |
| 0.04198 | 18.31697 | 15.69457 | 11.71232 |
| 0.04414 | 18.27286 | 15.61264 | 11.61434 |
| 0.0464  | 18.2282  | 15.53026 | 11.51711 |
| 0.04877 | 18.18297 | 15.44746 | 11.42066 |
| 0.05126 | 18.13718 | 15.36424 | 11.32501 |
| 0.05388 | 18.09082 | 15.28064 | 11.23018 |
| 0.05662 | 18.04391 | 15.19666 | 11.13618 |
| 0.05951 | 17.99644 | 15.11234 | 11.04305 |
| 0.06253 | 17.94841 | 15.02768 | 10.95079 |
| 0.06571 | 17.89982 | 14.94273 | 10.85943 |
| 0.06905 | 17.85069 | 14.85749 | 10.76897 |
| 0.07256 | 17.80101 | 14.772   | 10.67945 |
| 0.07624 | 17.75079 | 14.68627 | 10.59087 |
| 0.0801  | 17.70003 | 14.60034 | 10.50325 |
| 0.08416 | 17.64874 | 14.51423 | 10.41661 |
| 0.08842 | 17.59693 | 14.42796 | 10.33095 |
| 0.09289 | 17.54459 | 14.34157 | 10.2463  |
| 0.09759 | 17.49174 | 14.25507 | 10.16266 |
| 0.10252 | 17.43839 | 14.1685  | 10.08005 |
| 0.1077  | 17.38454 | 14.08189 | 9.99847  |

|         |          |          |         |
|---------|----------|----------|---------|
| 0.11314 | 17.3302  | 13.99525 | 9.91794 |
| 0.11885 | 17.27538 | 13.90863 | 9.83846 |
| 0.12485 | 17.22009 | 13.82204 | 9.76004 |
| 0.13114 | 17.16434 | 13.73552 | 9.68269 |
| 0.13775 | 17.10814 | 13.6491  | 9.60641 |
| 0.14469 | 17.0515  | 13.5628  | 9.53121 |
| 0.15198 | 16.99443 | 13.47665 | 9.45709 |
| 0.15963 | 16.93695 | 13.39068 | 9.38405 |
| 0.16767 | 16.87906 | 13.30492 | 9.3121  |
| 0.1761  | 16.82078 | 13.2194  | 9.24123 |
| 0.18496 | 16.76212 | 13.13414 | 9.17145 |
| 0.19426 | 16.70309 | 13.04918 | 9.10276 |
| 0.20403 | 16.64372 | 12.96453 | 9.03515 |
| 0.21428 | 16.58401 | 12.88023 | 8.96862 |
| 0.22505 | 16.52397 | 12.7963  | 8.90317 |
| 0.23635 | 16.46363 | 12.71277 | 8.83879 |
| 0.24822 | 16.403   | 12.62966 | 8.77548 |
| 0.26069 | 16.34209 | 12.54701 | 8.71323 |
| 0.27377 | 16.28093 | 12.46482 | 8.65204 |
| 0.28751 | 16.21952 | 12.38313 | 8.59191 |
| 0.30194 | 16.15788 | 12.30196 | 8.53281 |
| 0.31709 | 16.09603 | 12.22133 | 8.47475 |
| 0.333   | 16.03399 | 12.14127 | 8.41771 |
| 0.3497  | 15.97178 | 12.06178 | 8.3617  |
| 0.36724 | 15.9094  | 11.9829  | 8.30668 |
| 0.38566 | 15.84688 | 11.90465 | 8.25267 |

|         |          |          |         |
|---------|----------|----------|---------|
| 0.40499 | 15.78424 | 11.82703 | 8.19964 |
| 0.42529 | 15.72149 | 11.75007 | 8.14759 |
| 0.44661 | 15.65866 | 11.67379 | 8.09651 |
| 0.46899 | 15.59575 | 11.59819 | 8.04637 |
| 0.4925  | 15.53279 | 11.5233  | 7.99718 |
| 0.51717 | 15.46979 | 11.44913 | 7.94892 |
| 0.54309 | 15.40678 | 11.37569 | 7.90157 |
| 0.57029 | 15.34376 | 11.303   | 7.85513 |
| 0.59886 | 15.28076 | 11.23106 | 7.80958 |
| 0.62886 | 15.21779 | 11.15988 | 7.7649  |
| 0.66035 | 15.15488 | 11.08948 | 7.72109 |
| 0.69342 | 15.09203 | 11.01986 | 7.67814 |
| 0.72815 | 15.02927 | 10.95103 | 7.63602 |
| 0.76461 | 14.96661 | 10.883   | 7.59473 |
| 0.80289 | 14.90407 | 10.81576 | 7.55424 |
| 0.84309 | 14.84166 | 10.74934 | 7.51456 |
| 0.88529 | 14.7794  | 10.68373 | 7.47566 |
| 0.92961 | 14.7173  | 10.61893 | 7.43754 |
| 0.97614 | 14.65539 | 10.55495 | 7.40017 |
| 1.025   | 14.59366 | 10.49179 | 7.36354 |
| 1.07631 | 14.53215 | 10.42944 | 7.32764 |
| 1.13017 | 14.47086 | 10.36792 | 7.29247 |
| 1.18674 | 14.40981 | 10.30721 | 7.25799 |
| 1.24613 | 14.34901 | 10.24733 | 7.22421 |
| 1.30848 | 14.28847 | 10.18826 | 7.1911  |
| 1.37396 | 14.2282  | 10.13    | 7.15866 |

|         |          |          |         |
|---------|----------|----------|---------|
| 1.44271 | 14.16822 | 10.07256 | 7.12687 |
| 1.5149  | 14.10855 | 10.01592 | 7.09572 |
| 1.5907  | 14.04918 | 9.96009  | 7.06519 |
| 1.67029 | 13.99013 | 9.90505  | 7.03528 |
| 1.75385 | 13.93141 | 9.85081  | 7.00597 |
| 1.8416  | 13.87303 | 9.79736  | 6.97725 |
| 1.93373 | 13.815   | 9.74469  | 6.94911 |
| 2.03047 | 13.75733 | 9.69279  | 6.92153 |
| 2.13205 | 13.70003 | 9.64167  | 6.8945  |
| 2.2387  | 13.6431  | 9.5913   | 6.86802 |
| 2.35069 | 13.58655 | 9.5417   | 6.84206 |
| 2.46828 | 13.53039 | 9.49284  | 6.81663 |
| 2.59174 | 13.47463 | 9.44471  | 6.7917  |
| 2.72138 | 13.41927 | 9.39733  | 6.76727 |
| 2.85751 | 13.36432 | 9.35066  | 6.74333 |
| 3.00043 | 13.30977 | 9.30471  | 6.71986 |

Variation curves of the dissipation capacity of the surrounding rocks with unit length

| Time (h) | Scheme 1  | Scheme 2   | Scheme 3   |
|----------|-----------|------------|------------|
| 0        | 3685.4639 | 3685.46327 | 3685.45954 |
| 5.28E-06 | 3685.4626 | 3685.46131 | 3685.45374 |
| 1.07E-05 | 3685.4612 | 3685.45929 | 3685.44777 |
| 1.63E-05 | 3685.4598 | 3685.45721 | 3685.44162 |
| 2.21E-05 | 3685.4584 | 3685.45507 | 3685.43528 |
| 2.80E-05 | 3685.4569 | 3685.45286 | 3685.42876 |



|          |           |            |            |
|----------|-----------|------------|------------|
| 3.41E-05 | 3685.4553 | 3685.45059 | 3685.42203 |
| 4.04E-05 | 3685.4538 | 3685.44825 | 3685.41511 |
| 4.69E-05 | 3685.4521 | 3685.44584 | 3685.40798 |
| 5.36E-05 | 3685.4505 | 3685.44335 | 3685.40063 |
| 6.05E-05 | 3685.4487 | 3685.44079 | 3685.39306 |
| 6.76E-05 | 3685.447  | 3685.43816 | 3685.38527 |
| 7.49E-05 | 3685.4451 | 3685.43545 | 3685.37724 |
| 8.24E-05 | 3685.4433 | 3685.43265 | 3685.36898 |
| 9.02E-05 | 3685.4413 | 3685.42977 | 3685.36046 |
| 9.82E-05 | 3685.4393 | 3685.42681 | 3685.35169 |
| 1.06E-04 | 3685.4373 | 3685.42375 | 3685.34265 |
| 1.15E-04 | 3685.4351 | 3685.4206  | 3685.33335 |
| 1.24E-04 | 3685.4329 | 3685.41736 | 3685.32376 |
| 1.33E-04 | 3685.4307 | 3685.41403 | 3685.31389 |
| 1.42E-04 | 3685.4284 | 3685.41059 | 3685.30372 |
| 1.51E-04 | 3685.426  | 3685.40705 | 3685.29325 |
| 1.61E-04 | 3685.4235 | 3685.4034  | 3685.28246 |
| 1.71E-04 | 3685.421  | 3685.39964 | 3685.27135 |
| 1.82E-04 | 3685.4184 | 3685.39577 | 3685.25991 |
| 1.92E-04 | 3685.4157 | 3685.39179 | 3685.24812 |
| 2.03E-04 | 3685.4129 | 3685.38768 | 3685.23598 |
| 2.15E-04 | 3685.4101 | 3685.38346 | 3685.22347 |
| 2.27E-04 | 3685.4071 | 3685.3791  | 3685.21059 |
| 2.39E-04 | 3685.4041 | 3685.37462 | 3685.19733 |
| 2.51E-04 | 3685.401  | 3685.37    | 3685.18366 |
| 2.64E-04 | 3685.3978 | 3685.36524 | 3685.16959 |

|          |           |            |            |
|----------|-----------|------------|------------|
| 2.77E-04 | 3685.3945 | 3685.36034 | 3685.15509 |
| 2.91E-04 | 3685.3911 | 3685.35529 | 3685.14016 |
| 3.05E-04 | 3685.3876 | 3685.35009 | 3685.12478 |
| 3.19E-04 | 3685.384  | 3685.34473 | 3685.10894 |
| 3.34E-04 | 3685.3803 | 3685.33921 | 3685.09262 |
| 3.49E-04 | 3685.3764 | 3685.33353 | 3685.07581 |
| 3.65E-04 | 3685.3725 | 3685.32768 | 3685.05851 |
| 3.81E-04 | 3685.3684 | 3685.32165 | 3685.04068 |
| 3.98E-04 | 3685.3642 | 3685.31544 | 3685.02231 |
| 4.15E-04 | 3685.3599 | 3685.30905 | 3685.0034  |
| 4.33E-04 | 3685.3555 | 3685.30246 | 3684.98392 |
| 4.51E-04 | 3685.3509 | 3685.29568 | 3684.96385 |
| 4.70E-04 | 3685.3462 | 3685.28869 | 3684.94318 |
| 4.89E-04 | 3685.3413 | 3685.28149 | 3684.92189 |
| 5.09E-04 | 3685.3363 | 3685.27408 | 3684.89997 |
| 5.30E-04 | 3685.3312 | 3685.26644 | 3684.87738 |
| 5.51E-04 | 3685.3259 | 3685.25857 | 3684.85412 |
| 5.73E-04 | 3685.3204 | 3685.25047 | 3684.83016 |
| 5.95E-04 | 3685.3148 | 3685.24213 | 3684.80549 |
| 6.18E-04 | 3685.309  | 3685.23353 | 3684.78007 |
| 6.42E-04 | 3685.303  | 3685.22468 | 3684.75389 |
| 6.67E-04 | 3685.2969 | 3685.21556 | 3684.72692 |
| 6.92E-04 | 3685.2906 | 3685.20617 | 3684.69915 |
| 7.18E-04 | 3685.284  | 3685.1965  | 3684.67054 |
| 7.45E-04 | 3685.2773 | 3685.18654 | 3684.64108 |
| 7.73E-04 | 3685.2704 | 3685.17627 | 3684.61073 |

|          |           |            |            |
|----------|-----------|------------|------------|
| 8.01E-04 | 3685.2633 | 3685.1657  | 3684.57947 |
| 8.30E-04 | 3685.2559 | 3685.15482 | 3684.54727 |
| 8.61E-04 | 3685.2484 | 3685.1436  | 3684.51411 |
| 8.92E-04 | 3685.2406 | 3685.13205 | 3684.47995 |
| 9.24E-04 | 3685.2326 | 3685.12016 | 3684.44477 |
| 9.57E-04 | 3685.2243 | 3685.1079  | 3684.40854 |
| 9.91E-04 | 3685.2158 | 3685.09528 | 3684.37121 |
| 0.00103  | 3685.207  | 3685.08228 | 3684.33277 |
| 0.00106  | 3685.198  | 3685.06889 | 3684.29318 |
| 0.0011   | 3685.1887 | 3685.0551  | 3684.25239 |
| 0.00114  | 3685.1791 | 3685.0409  | 3684.21039 |
| 0.00118  | 3685.1693 | 3685.02627 | 3684.16712 |
| 0.00122  | 3685.1591 | 3685.0112  | 3684.12256 |
| 0.00126  | 3685.1486 | 3684.99568 | 3684.07666 |
| 0.0013   | 3685.1379 | 3684.97969 | 3684.02939 |
| 0.00135  | 3685.1268 | 3684.96322 | 3683.9807  |
| 0.00139  | 3685.1153 | 3684.94626 | 3683.93054 |
| 0.00144  | 3685.1035 | 3684.92879 | 3683.87889 |
| 0.00149  | 3685.0914 | 3684.9108  | 3683.82568 |
| 0.00154  | 3685.0789 | 3684.89227 | 3683.77088 |
| 0.00159  | 3685.066  | 3684.87318 | 3683.71444 |
| 0.00164  | 3685.0528 | 3684.85352 | 3683.6563  |
| 0.0017   | 3685.0391 | 3684.83327 | 3683.59642 |
| 0.00175  | 3685.0251 | 3684.81241 | 3683.53475 |
| 0.00181  | 3685.0106 | 3684.79092 | 3683.47123 |
| 0.00187  | 3684.9957 | 3684.76879 | 3683.4058  |

|         |           |            |            |
|---------|-----------|------------|------------|
| 0.00193 | 3684.9803 | 3684.746   | 3683.33841 |
| 0.00199 | 3684.9645 | 3684.72253 | 3683.269   |
| 0.00206 | 3684.9482 | 3684.69835 | 3683.19751 |
| 0.00213 | 3684.9314 | 3684.67344 | 3683.12387 |
| 0.0022  | 3684.9141 | 3684.64779 | 3683.04803 |
| 0.00227 | 3684.8963 | 3684.62137 | 3682.96992 |
| 0.00234 | 3684.8779 | 3684.59415 | 3682.88946 |
| 0.00242 | 3684.859  | 3684.56612 | 3682.80659 |
| 0.00249 | 3684.8395 | 3684.53725 | 3682.72124 |
| 0.00257 | 3684.8195 | 3684.50751 | 3682.63333 |
| 0.00266 | 3684.7988 | 3684.47689 | 3682.54278 |
| 0.00274 | 3684.7776 | 3684.44534 | 3682.44952 |
| 0.00283 | 3684.7557 | 3684.41285 | 3682.35347 |
| 0.00292 | 3684.7331 | 3684.37938 | 3682.25454 |
| 0.00301 | 3684.7099 | 3684.34491 | 3682.15264 |
| 0.00311 | 3684.6859 | 3684.3094  | 3682.04768 |
| 0.00321 | 3684.6613 | 3684.27283 | 3681.93959 |
| 0.00331 | 3684.6359 | 3684.23516 | 3681.82825 |
| 0.00341 | 3684.6097 | 3684.19637 | 3681.71357 |
| 0.00352 | 3684.5828 | 3684.15641 | 3681.59546 |
| 0.00363 | 3684.555  | 3684.11525 | 3681.47381 |
| 0.00374 | 3684.5264 | 3684.07286 | 3681.34852 |
| 0.00386 | 3684.497  | 3684.0292  | 3681.21947 |
| 0.00398 | 3684.4667 | 3683.98422 | 3681.08655 |
| 0.00411 | 3684.4354 | 3683.9379  | 3680.94966 |
| 0.00424 | 3684.4033 | 3683.89019 | 3680.80866 |

|         |           |            |            |
|---------|-----------|------------|------------|
| 0.00437 | 3684.3701 | 3683.84105 | 3680.66343 |
| 0.0045  | 3684.336  | 3683.79044 | 3680.51386 |
| 0.00464 | 3684.3008 | 3683.7383  | 3680.3598  |
| 0.00479 | 3684.2646 | 3683.68461 | 3680.20114 |
| 0.00494 | 3684.2273 | 3683.6293  | 3680.03771 |
| 0.00509 | 3684.1889 | 3683.57234 | 3679.8694  |
| 0.00525 | 3684.1494 | 3683.51367 | 3679.69604 |
| 0.00541 | 3684.1086 | 3683.45324 | 3679.51749 |
| 0.00558 | 3684.0667 | 3683.391   | 3679.33359 |
| 0.00575 | 3684.0234 | 3683.32689 | 3679.14419 |
| 0.00593 | 3683.9789 | 3683.26086 | 3678.94912 |
| 0.00611 | 3683.933  | 3683.19285 | 3678.7482  |
| 0.0063  | 3683.8858 | 3683.1228  | 3678.54127 |
| 0.0065  | 3683.8372 | 3683.05065 | 3678.32814 |
| 0.0067  | 3683.7871 | 3682.97634 | 3678.10864 |
| 0.0069  | 3683.7354 | 3682.8998  | 3677.88256 |
| 0.00712 | 3683.6823 | 3682.82097 | 3677.64971 |
| 0.00733 | 3683.6275 | 3682.73977 | 3677.4099  |
| 0.00756 | 3683.5711 | 3682.65614 | 3677.16291 |
| 0.00779 | 3683.513  | 3682.57    | 3676.90852 |
| 0.00803 | 3683.4532 | 3682.48129 | 3676.64653 |
| 0.00828 | 3683.3916 | 3682.38991 | 3676.37669 |
| 0.00853 | 3683.3281 | 3682.29579 | 3676.09878 |
| 0.00879 | 3683.2628 | 3682.19885 | 3675.81256 |
| 0.00906 | 3683.1954 | 3682.09901 | 3675.51778 |
| 0.00934 | 3683.1261 | 3681.99617 | 3675.21417 |

|         |           |            |            |
|---------|-----------|------------|------------|
| 0.00962 | 3683.0547 | 3681.89026 | 3674.90149 |
| 0.00992 | 3682.9811 | 3681.78117 | 3674.57945 |
| 0.01022 | 3682.9053 | 3681.66881 | 3674.24779 |
| 0.01053 | 3682.8273 | 3681.55308 | 3673.9062  |
| 0.01085 | 3682.7469 | 3681.43388 | 3673.55441 |
| 0.01118 | 3682.6641 | 3681.31112 | 3673.19209 |
| 0.01152 | 3682.5788 | 3681.18467 | 3672.81895 |
| 0.01188 | 3682.491  | 3681.05444 | 3672.43465 |
| 0.01224 | 3682.4005 | 3680.9203  | 3672.03887 |
| 0.01261 | 3682.3073 | 3680.78215 | 3671.63126 |
| 0.01299 | 3682.2114 | 3680.63986 | 3671.21147 |
| 0.01339 | 3682.1125 | 3680.4933  | 3670.77914 |
| 0.0138  | 3682.0107 | 3680.34236 | 3670.3339  |
| 0.01421 | 3681.9059 | 3680.18689 | 3669.87536 |
| 0.01465 | 3681.7979 | 3680.02677 | 3669.40312 |
| 0.01509 | 3681.6866 | 3679.86185 | 3668.91678 |
| 0.01555 | 3681.5721 | 3679.69199 | 3668.41593 |
| 0.01602 | 3681.4541 | 3679.51705 | 3667.90012 |
| 0.01651 | 3681.3325 | 3679.33686 | 3667.36891 |
| 0.01701 | 3681.2074 | 3679.15128 | 3666.82186 |
| 0.01752 | 3681.0784 | 3678.96015 | 3666.25848 |
| 0.01805 | 3680.9457 | 3678.76329 | 3665.67829 |
| 0.0186  | 3680.8089 | 3678.56054 | 3665.0808  |
| 0.01916 | 3680.668  | 3678.35171 | 3664.46549 |
| 0.01974 | 3680.523  | 3678.13664 | 3663.83183 |
| 0.02034 | 3680.3735 | 3677.91513 | 3663.17929 |

|         |           |            |            |
|---------|-----------|------------|------------|
| 0.02096 | 3680.2196 | 3677.68698 | 3662.50729 |
| 0.02159 | 3680.0611 | 3677.45201 | 3661.81527 |
| 0.02224 | 3679.8979 | 3677.21001 | 3661.10263 |
| 0.02292 | 3679.7297 | 3676.96076 | 3660.36876 |
| 0.02361 | 3679.5566 | 3676.70406 | 3659.61303 |
| 0.02432 | 3679.3782 | 3676.43968 | 3658.8348  |
| 0.02506 | 3679.1945 | 3676.16738 | 3658.03341 |
| 0.02581 | 3679.0053 | 3675.88694 | 3657.20817 |
| 0.02659 | 3678.8104 | 3675.59811 | 3656.35837 |
| 0.0274  | 3678.6097 | 3675.30064 | 3655.48329 |
| 0.02822 | 3678.403  | 3674.99427 | 3654.58219 |
| 0.02908 | 3678.1901 | 3674.67875 | 3653.6543  |
| 0.02995 | 3677.9709 | 3674.35378 | 3652.69882 |
| 0.03086 | 3677.745  | 3674.0191  | 3651.71496 |
| 0.03179 | 3677.5125 | 3673.67442 | 3650.70186 |
| 0.03275 | 3677.2729 | 3673.31943 | 3649.65868 |
| 0.03374 | 3677.0262 | 3672.95382 | 3648.58453 |
| 0.03475 | 3676.7721 | 3672.5773  | 3647.4785  |
| 0.0358  | 3676.5104 | 3672.18951 | 3646.33966 |
| 0.03688 | 3676.2409 | 3671.79015 | 3645.16703 |
| 0.03799 | 3675.9633 | 3671.37885 | 3643.95964 |
| 0.03914 | 3675.6775 | 3670.95526 | 3642.71646 |
| 0.04032 | 3675.383  | 3670.51902 | 3641.43645 |
| 0.04153 | 3675.0798 | 3670.06975 | 3640.11853 |
| 0.04278 | 3674.7675 | 3669.60707 | 3638.76159 |
| 0.04407 | 3674.4459 | 3669.13057 | 3637.36449 |

|         |           |            |            |
|---------|-----------|------------|------------|
| 0.0454  | 3674.1146 | 3668.63984 | 3635.92607 |
| 0.04677 | 3673.7735 | 3668.13447 | 3634.44511 |
| 0.04817 | 3673.4222 | 3667.61402 | 3632.92038 |
| 0.04963 | 3673.0603 | 3667.07803 | 3631.3506  |
| 0.05112 | 3672.6877 | 3666.52605 | 3629.73447 |
| 0.05266 | 3672.3039 | 3665.95761 | 3628.07064 |
| 0.05424 | 3671.9087 | 3665.37222 | 3626.35772 |
| 0.05588 | 3671.5016 | 3664.76936 | 3624.5943  |
| 0.05756 | 3671.0824 | 3664.14854 | 3622.77891 |
| 0.05929 | 3670.6507 | 3663.50921 | 3620.91005 |
| 0.06107 | 3670.2061 | 3662.85082 | 3618.98617 |
| 0.06291 | 3669.7483 | 3662.17281 | 3617.00569 |
| 0.0648  | 3669.2767 | 3661.47461 | 3614.96698 |
| 0.06675 | 3668.7911 | 3660.75561 | 3612.86835 |
| 0.06876 | 3668.2911 | 3660.0152  | 3610.7081  |
| 0.07083 | 3667.7761 | 3659.25275 | 3608.48444 |
| 0.07296 | 3667.2457 | 3658.4676  | 3606.19557 |
| 0.07515 | 3666.6995 | 3657.65909 | 3603.83961 |
| 0.07741 | 3666.1371 | 3656.82652 | 3601.41465 |
| 0.07974 | 3665.5578 | 3655.96919 | 3598.91871 |
| 0.08214 | 3664.9613 | 3655.08637 | 3596.34979 |
| 0.08461 | 3664.3471 | 3654.1773  | 3593.70579 |
| 0.08715 | 3663.7145 | 3653.24122 | 3590.98459 |
| 0.08977 | 3663.0631 | 3652.27732 | 3588.18401 |
| 0.09247 | 3662.3924 | 3651.28479 | 3585.30178 |
| 0.09525 | 3661.7016 | 3650.2628  | 3582.33561 |



|         |           |            |            |
|---------|-----------|------------|------------|
| 0.09811 | 3660.9903 | 3649.21046 | 3579.28312 |
| 0.10106 | 3660.2578 | 3648.1269  | 3576.1419  |
| 0.1041  | 3659.5035 | 3647.01119 | 3572.90944 |
| 0.10722 | 3658.7268 | 3645.8624  | 3569.58319 |
| 0.11045 | 3657.9271 | 3644.67955 | 3566.16053 |
| 0.11377 | 3657.1035 | 3643.46165 | 3562.63876 |
| 0.11718 | 3656.2555 | 3642.20767 | 3559.01513 |
| 0.1207  | 3655.3822 | 3640.91655 | 3555.28681 |
| 0.12433 | 3654.4831 | 3639.58722 | 3551.45089 |
| 0.12807 | 3653.5572 | 3638.21856 | 3547.5044  |
| 0.13191 | 3652.6039 | 3636.80942 | 3543.4443  |
| 0.13588 | 3651.6223 | 3635.35862 | 3539.26746 |
| 0.13996 | 3650.6115 | 3633.86495 | 3534.97067 |
| 0.14416 | 3649.5708 | 3632.32716 | 3530.55067 |
| 0.14849 | 3648.4993 | 3630.74397 | 3526.00409 |
| 0.15295 | 3647.396  | 3629.11407 | 3521.32749 |
| 0.15755 | 3646.26   | 3627.43609 | 3516.51735 |
| 0.16228 | 3645.0904 | 3625.70865 | 3511.57007 |
| 0.16715 | 3643.8862 | 3623.93031 | 3506.48196 |
| 0.17217 | 3642.6463 | 3622.09961 | 3501.24923 |
| 0.17734 | 3641.3698 | 3620.21502 | 3495.86804 |
| 0.18267 | 3640.0556 | 3618.27501 | 3490.33442 |
| 0.18815 | 3638.7025 | 3616.27797 | 3484.64434 |
| 0.1938  | 3637.3095 | 3614.22227 | 3478.79367 |
| 0.19962 | 3635.8754 | 3612.10621 | 3472.77818 |
| 0.20562 | 3634.3989 | 3609.92806 | 3466.59356 |

|         |           |            |            |
|---------|-----------|------------|------------|
| 0.21179 | 3632.879  | 3607.68606 | 3460.23542 |
| 0.21815 | 3631.3142 | 3605.37836 | 3453.69923 |
| 0.2247  | 3629.7033 | 3603.0031  | 3446.98042 |
| 0.23144 | 3628.045  | 3600.55835 | 3440.0743  |
| 0.23839 | 3626.338  | 3598.04213 | 3432.97607 |
| 0.24555 | 3624.5807 | 3595.4524  | 3425.68086 |
| 0.25292 | 3622.7718 | 3592.78709 | 3418.18369 |
| 0.26051 | 3620.9098 | 3590.04405 | 3410.4795  |
| 0.26833 | 3618.9931 | 3587.22108 | 3402.56311 |
| 0.27639 | 3617.0202 | 3584.31593 | 3394.42926 |
| 0.28469 | 3614.9895 | 3581.32628 | 3386.0726  |
| 0.29323 | 3612.8993 | 3578.24975 | 3377.48767 |
| 0.30204 | 3610.7479 | 3575.08391 | 3368.66892 |
| 0.3111  | 3608.5336 | 3571.82626 | 3359.61072 |
| 0.32044 | 3606.2546 | 3568.47422 | 3350.30733 |
| 0.33006 | 3603.9091 | 3565.02518 | 3340.75293 |
| 0.33997 | 3601.4951 | 3561.47644 | 3330.94162 |
| 0.35017 | 3599.0108 | 3557.82521 | 3320.86739 |
| 0.36068 | 3596.4541 | 3554.06868 | 3310.52416 |
| 0.37151 | 3593.823  | 3550.20393 | 3299.90578 |
| 0.38266 | 3591.1154 | 3546.22798 | 3289.00599 |
| 0.39414 | 3588.3292 | 3542.13779 | 3277.81847 |
| 0.40597 | 3585.4621 | 3537.93021 | 3266.33685 |
| 0.41815 | 3582.5119 | 3533.60206 | 3254.55465 |
| 0.4307  | 3579.4763 | 3529.15004 | 3242.46534 |
| 0.44363 | 3576.3529 | 3524.57079 | 3230.06236 |

|         |           |            |            |
|---------|-----------|------------|------------|
| 0.45695 | 3573.1392 | 3519.86088 | 3217.33905 |
| 0.47066 | 3569.8328 | 3515.01678 | 3204.28872 |
| 0.48478 | 3566.4311 | 3510.03489 | 3190.90465 |
| 0.49933 | 3562.9314 | 3504.91152 | 3177.18007 |
| 0.51432 | 3559.3311 | 3499.6429  | 3163.10817 |
| 0.52975 | 3555.6275 | 3494.22517 | 3148.68214 |
| 0.54565 | 3551.8176 | 3488.65439 | 3133.89514 |
| 0.56203 | 3547.8986 | 3482.92652 | 3118.74034 |
| 0.57889 | 3543.8675 | 3477.03744 | 3103.2109  |
| 0.59626 | 3539.7213 | 3470.98295 | 3087.3     |
| 0.61416 | 3535.4569 | 3464.75874 | 3071.00085 |
| 0.63259 | 3531.0711 | 3458.36042 | 3054.30668 |
| 0.65157 | 3526.5606 | 3451.78351 | 3037.2108  |
| 0.67112 | 3521.9222 | 3445.02343 | 3019.70654 |
| 0.69126 | 3517.1523 | 3438.07553 | 3001.78735 |
| 0.712   | 3512.2476 | 3430.93503 | 2983.44674 |
| 0.73337 | 3507.2044 | 3423.5971  | 2964.67833 |
| 0.75538 | 3502.0192 | 3416.05677 | 2945.47588 |
| 0.77804 | 3496.6881 | 3408.30903 | 2925.83325 |
| 0.80139 | 3491.2074 | 3400.34874 | 2905.7445  |
| 0.82544 | 3485.5733 | 3392.17067 | 2885.20384 |
| 0.8502  | 3479.7817 | 3383.76952 | 2864.20568 |
| 0.87572 | 3473.8287 | 3375.13988 | 2842.74465 |
| 0.90199 | 3467.71   | 3366.27627 | 2820.81561 |
| 0.92906 | 3461.4215 | 3357.1731  | 2798.41368 |
| 0.95693 | 3454.9589 | 3347.82471 | 2775.53427 |

|         |           |            |            |
|---------|-----------|------------|------------|
| 0.98565 | 3448.3178 | 3338.22535 | 2752.17309 |
| 1.01522 | 3441.4938 | 3328.36918 | 2728.32619 |
| 1.04568 | 3434.4823 | 3318.25028 | 2703.98998 |
| 1.07706 | 3427.2786 | 3307.86268 | 2679.16123 |
| 1.10938 | 3419.8782 | 3297.20028 | 2653.83717 |
| 1.14266 | 3412.2762 | 3286.25697 | 2628.01544 |
| 1.17695 | 3404.4677 | 3275.02652 | 2601.69416 |
| 1.21226 | 3396.4478 | 3263.50267 | 2574.87196 |
| 1.24864 | 3388.2114 | 3251.67908 | 2547.54799 |
| 1.2861  | 3379.7535 | 3239.54936 | 2519.72198 |
| 1.32469 | 3371.0689 | 3227.10707 | 2491.39426 |
| 1.36444 | 3362.1524 | 3214.34573 | 2462.56579 |
| 1.40537 | 3352.9986 | 3201.25881 | 2433.23819 |
| 1.44754 | 3343.602  | 3187.83976 | 2403.41379 |
| 1.49097 | 3333.9574 | 3174.08199 | 2373.09564 |
| 1.53571 | 3324.0591 | 3159.9789  | 2342.28758 |
| 1.58178 | 3313.9016 | 3145.52389 | 2310.99424 |
| 1.62924 | 3303.4792 | 3130.71035 | 2279.22108 |
| 1.67812 | 3292.7863 | 3115.53167 | 2246.97445 |
| 1.72847 | 3281.817  | 3099.98127 | 2214.26159 |
| 1.78033 | 3270.5657 | 3084.0526  | 2181.09069 |
| 1.83375 | 3259.0265 | 3067.73915 | 2147.4709  |
| 1.88877 | 3247.1936 | 3051.03445 | 2113.41239 |
| 1.94543 | 3235.061  | 3033.93211 | 2078.92633 |
| 2.0038  | 3222.6228 | 3016.42581 | 2044.02499 |
| 2.06392 | 3209.8733 | 2998.50934 | 2008.72168 |

|         |           |            |            |
|---------|-----------|------------|------------|
| 2.12584 | 3196.8063 | 2980.17658 | 1973.03087 |
| 2.18962 | 3183.4161 | 2961.42153 | 1936.96812 |
| 2.25532 | 3169.6967 | 2942.23836 | 1900.55018 |
| 2.32298 | 3155.6421 | 2922.62137 | 1863.79494 |
| 2.39268 | 3141.2467 | 2902.56504 | 1826.7215  |
| 2.46446 | 3126.5044 | 2882.06408 | 1789.35014 |
| 2.5384  | 3111.4097 | 2861.11337 | 1751.70233 |
| 2.61456 | 3095.9567 | 2839.70806 | 1713.80076 |
| 2.693   | 3080.1398 | 2817.84354 | 1675.66933 |
| 2.7738  | 3063.9534 | 2795.51551 | 1637.3331  |
| 2.85702 | 3047.3922 | 2772.71996 | 1598.81833 |
| 2.94273 | 3030.4508 | 2749.4532  | 1560.15246 |
| 3.03102 | 3013.1239 | 2725.71192 | 1521.36403 |
| 3.12196 | 2995.4066 | 2701.49319 | 1482.48273 |
| 3.21562 | 2977.2939 | 2676.79448 | 1443.53929 |
| 3.31209 | 2958.7812 | 2651.6137  | 1404.56549 |
| 3.41146 | 2939.8638 | 2625.94926 | 1365.59409 |
| 3.51381 | 2920.5376 | 2599.80003 | 1326.65876 |
| 3.61923 | 2900.7984 | 2573.16542 | 1287.79404 |
| 3.72781 | 2880.6424 | 2546.04542 | 1249.03526 |
| 3.83965 | 2860.0661 | 2518.44058 | 1210.41844 |
| 3.95485 | 2839.0664 | 2490.35211 | 1171.98023 |
| 4.0735  | 2817.6402 | 2461.78184 | 1133.75782 |
| 4.19571 | 2795.785  | 2432.73231 | 1095.7888  |
| 4.32158 | 2773.4987 | 2403.20678 | 1058.11108 |
| 4.45124 | 2750.7794 | 2373.20928 | 1020.76277 |

|         |           |            |           |
|---------|-----------|------------|-----------|
| 4.58478 | 2727.6259 | 2342.74459 | 983.78206 |
| 4.72233 | 2704.0371 | 2311.81834 | 947.20707 |
| 4.864   | 2680.0127 | 2280.43702 | 911.07572 |
| 5.00993 | 2655.5526 | 2248.608   | 875.42562 |
| 5.16023 | 2630.6576 | 2216.33954 | 840.29386 |
| 5.31504 | 2605.3287 | 2183.64089 | 805.71694 |
| 5.4745  | 2579.5677 | 2150.52225 | 771.73054 |
| 5.63874 | 2553.3769 | 2116.99484 | 738.3694  |
| 5.80791 | 2526.7593 | 2083.07089 | 705.66717 |
| 5.98215 | 2499.7187 | 2048.76373 | 673.65623 |
| 6.16162 | 2472.2593 | 2014.08771 | 642.36754 |
| 6.34648 | 2444.3863 | 1979.05834 | 611.8305  |
| 6.53687 | 2416.1056 | 1943.6922  | 582.07277 |
| 6.73299 | 2387.4237 | 1908.00703 | 553.12013 |
| 6.93498 | 2358.3482 | 1872.02169 | 524.99638 |
| 7.14304 | 2328.8873 | 1835.75623 | 497.72315 |
| 7.35733 | 2299.0502 | 1799.23181 | 471.31979 |
| 7.57806 | 2268.847  | 1762.47079 | 445.80329 |
| 7.8054  | 2238.2885 | 1725.49663 | 421.18814 |
| 8.03957 | 2207.3868 | 1688.33399 | 397.48626 |
| 8.28076 | 2176.1546 | 1651.00862 | 374.7069  |
| 8.52919 | 2144.6057 | 1613.54739 | 352.85664 |
| 8.78507 | 2112.7548 | 1575.97824 | 331.93927 |
| 9.04863 | 2080.6178 | 1538.33019 | 311.95584 |
| 9.3201  | 2048.2114 | 1500.63324 | 292.90459 |
| 9.5997  | 2015.5534 | 1462.91838 | 274.78101 |

|          |           |            |           |
|----------|-----------|------------|-----------|
| 9.8877   | 1982.6625 | 1425.21752 | 257.57786 |
| 10.18434 | 1949.5584 | 1387.56341 | 241.28519 |
| 10.48987 | 1916.262  | 1349.98961 | 225.89048 |
| 10.80457 | 1882.795  | 1312.5304  | 211.37865 |
| 11.12871 | 1849.18   | 1275.2207  | 197.73224 |
| 11.46258 | 1815.4408 | 1238.09598 | 184.9315  |
| 11.80646 | 1781.6019 | 1201.19218 | 172.95453 |
| 12.16066 | 1747.6888 | 1164.5456  | 161.77746 |
| 12.52549 | 1713.7278 | 1128.19278 | 151.37464 |
| 12.90126 | 1679.7461 | 1092.17041 | 141.71877 |
| 13.2883  | 1645.7716 | 1056.51517 | 132.78116 |
| 13.68696 | 1611.833  | 1021.26364 | 124.53189 |
| 14.09757 | 1577.9594 | 986.45217  | 116.94004 |
| 14.5205  | 1544.1808 | 952.1167   | 109.97393 |
| 14.95612 | 1510.5276 | 918.29264  | 103.60129 |
| 15.40481 | 1477.0306 | 885.01475  | 97.7895   |
| 15.86696 | 1443.7209 | 852.31693  | 92.50581  |
| 16.34298 | 1410.6301 | 820.23214  | 87.71753  |
| 16.83327 | 1377.7897 | 788.7922   | 83.39226  |
| 17.33827 | 1345.2314 | 758.02764  | 79.49803  |
| 17.85843 | 1312.9869 | 727.96757  | 76.00351  |
| 18.39419 | 1281.0875 | 698.63954  | 72.87817  |
| 18.94602 | 1249.5646 | 670.06934  | 70.0924   |
| 19.5144  | 1218.4488 | 642.28095  | 67.6177   |
| 20.09984 | 1187.7705 | 615.29631  | 65.42671  |
| 20.70284 | 1157.5593 | 589.13529  | 63.49338  |

|          |           |           |          |
|----------|-----------|-----------|----------|
| 21.32393 | 1127.8441 | 563.81549 | 61.793   |
| 21.96365 | 1098.6527 | 539.3522  | 60.30227 |
| 22.62257 | 1070.0122 | 515.75826 | 58.99934 |
| 23.30125 | 1041.9483 | 493.04404 | 57.86384 |
| 24.00029 | 1014.4854 | 471.21728 | 56.87687 |
| 24.72031 | 987.64651 | 450.28316 | 56.02101 |
| 25.46192 | 961.45317 | 430.24414 | 55.28027 |
| 26.22578 | 935.92517 | 411.10005 | 54.64006 |
| 27.01256 | 911.08057 | 392.84804 | 54.08718 |
| 27.82295 | 886.93555 | 375.4826  | 53.60968 |
| 28.65764 | 863.50432 | 358.99561 | 53.19689 |
| 29.51737 | 840.79903 | 343.37639 | 52.83927 |
| 30.4029  | 818.82971 | 328.61178 | 52.52838 |
| 31.31499 | 797.60418 | 314.68625 | 52.25679 |
| 32.25445 | 777.12804 | 301.58198 | 52.01797 |
| 33.22209 | 757.4046  | 289.27899 | 51.80626 |
| 34.21875 | 738.43486 | 277.75535 | 51.61675 |
| 35.24532 | 720.21752 | 266.98722 | 51.44523 |
| 36.30269 | 702.74898 | 256.94916 | 51.2881  |
| 37.39177 | 686.02336 | 247.61419 | 51.14228 |
| 38.51353 | 670.03254 | 238.95406 | 51.00521 |
| 39.66894 | 654.76624 | 230.93943 | 50.8747  |
| 40.85902 | 640.21205 | 223.54006 | 50.74895 |
| 42.08479 | 626.35556 | 216.72503 | 50.62646 |
| 43.34734 | 613.18044 | 210.46296 | 50.506   |
| 44.64777 | 600.66856 | 204.72221 | 50.38656 |



|          |           |           |          |
|----------|-----------|-----------|----------|
| 45.9872  | 588.80014 | 199.47104 | 50.2673  |
| 47.36683 | 577.55386 | 194.6779  | 50.14756 |
| 48.78784 | 566.90705 | 190.31151 | 50.0268  |
| 50.25148 | 556.83585 | 186.34114 | 49.90457 |
| 51.75903 | 547.31534 | 182.73668 | 49.78054 |
| 53.3118  | 538.31977 | 179.46888 | 49.6544  |
| 54.91116 | 529.82272 | 176.5094  | 49.52595 |
| 56.5585  | 521.79728 | 173.83103 | 49.39499 |
| 58.25526 | 514.21624 | 171.40768 | 49.26138 |
| 60.00292 | 507.05227 | 169.21456 | 49.125   |
| 61.80302 | 500.2781  | 167.22822 | 48.98574 |
| 63.65711 | 493.86668 | 165.42655 | 48.84351 |
| 65.56683 | 487.79136 | 163.7889  | 48.69826 |
| 67.53384 | 482.02605 | 162.29604 | 48.54991 |
| 69.55986 | 476.54532 | 160.93015 | 48.39842 |
| 71.64666 | 471.3246  | 159.67487 | 48.24373 |
| 73.79607 | 466.34023 | 158.51519 | 48.08581 |
| 76.00996 | 461.56958 | 157.43748 | 47.9246  |
| 78.29026 | 456.99119 | 156.42941 | 47.76009 |
| 80.63897 | 452.58474 | 155.47988 | 47.59222 |
| 83.05815 | 448.33121 | 154.579   | 47.42099 |
| 85.5499  | 444.21283 | 153.71795 | 47.24634 |
| 88.1164  | 440.21316 | 152.88898 | 47.06827 |
| 90.7599  | 436.31709 | 152.08527 | 46.88675 |
| 93.4827  | 432.5108  | 151.30089 | 46.70176 |
| 96.28719 | 428.78178 | 150.53071 | 46.51329 |

|           |           |           |          |
|-----------|-----------|-----------|----------|
| 99.17581  | 425.11878 | 149.77032 | 46.32131 |
| 102.15109 | 421.51176 | 149.01596 | 46.12582 |
| 105.21562 | 417.95187 | 148.26445 | 45.9268  |
| 108.3721  | 414.43137 | 147.51314 | 45.72426 |
| 111.62327 | 410.94354 | 146.75979 | 45.51819 |
| 114.97197 | 407.48267 | 146.00259 | 45.30859 |
| 118.42113 | 404.04394 | 145.24006 | 45.09546 |
| 121.97377 | 400.62336 | 144.471   | 44.87882 |
| 125.63299 | 397.21769 | 143.69448 | 44.65867 |
| 129.40199 | 393.8244  | 142.90976 | 44.43504 |
| 133.28405 | 390.44152 | 142.1163  | 44.20794 |
| 137.28258 | 387.06766 | 141.3137  | 43.97739 |
| 141.40106 | 383.70189 | 140.5017  | 43.74342 |
| 145.6431  | 380.34367 | 139.68012 | 43.50608 |
| 150.0124  | 376.99284 | 138.8489  | 43.26538 |
| 154.51277 | 373.64951 | 138.00803 | 43.02138 |
| 159.14816 | 370.31405 | 137.15757 | 42.77411 |
| 163.92261 | 366.98704 | 136.29763 | 42.52364 |
| 168.8403  | 363.6692  | 135.42837 | 42.27001 |
| 173.90551 | 360.3614  | 134.54998 | 42.01329 |
| 179.12268 | 357.0646  | 133.66268 | 41.75354 |
| 184.49637 | 353.7798  | 132.76672 | 41.49082 |
| 190.03126 | 350.5081  | 131.86238 | 41.22522 |
| 195.73221 | 347.25058 | 130.94995 | 40.95681 |
| 201.60418 | 344.00834 | 130.02976 | 40.68568 |
| 207.65231 | 340.7825  | 129.10212 | 40.41191 |

|           |           |           |          |
|-----------|-----------|-----------|----------|
| 213.88188 | 337.57412 | 128.16741 | 40.13559 |
| 220.29834 | 334.38427 | 127.22597 | 39.85683 |
| 226.9073  | 331.21396 | 126.27818 | 39.57572 |
| 233.71452 | 328.06416 | 125.32445 | 39.29237 |
| 240.72597 | 324.93582 | 124.36517 | 39.00689 |
| 247.94775 | 321.82981 | 123.40075 | 38.7194  |
| 255.38619 | 318.74695 | 122.43162 | 38.43    |
| 263.04778 | 315.68801 | 121.45821 | 38.13882 |
| 270.93922 | 312.65372 | 120.48097 | 37.84599 |
| 279.0674  | 309.64472 | 119.50033 | 37.55164 |
| 287.43943 | 306.66162 | 118.51676 | 37.25588 |
| 296.06261 | 303.70495 | 117.5307  | 36.95886 |
| 304.9445  | 300.7752  | 116.54262 | 36.66071 |
| 314.09284 | 297.8728  | 115.55299 | 36.36156 |
| 323.51563 | 294.99813 | 114.56226 | 36.06156 |
| 333.2211  | 292.1515  | 113.57091 | 35.76084 |
| 343.21774 | 289.3332  | 112.57939 | 35.45954 |
| 353.51428 | 286.54345 | 111.58817 | 35.15781 |
| 364.11971 | 283.78243 | 110.5977  | 34.85578 |
| 375.04331 | 281.05028 | 109.60843 | 34.5536  |
| 386.29461 | 278.34709 | 108.62081 | 34.2514  |
| 397.88346 | 275.67293 | 107.63527 | 33.94934 |
| 409.81997 | 273.02781 | 106.65226 | 33.64753 |
| 422.11457 | 270.41174 | 105.67217 | 33.34613 |
| 434.77801 | 267.82467 | 104.69544 | 33.04526 |
| 447.82136 | 265.26653 | 103.72245 | 32.74506 |

|           |           |           |          |
|-----------|-----------|-----------|----------|
| 461.256   | 262.73725 | 102.75359 | 32.44565 |
| 475.09369 | 260.23669 | 101.78922 | 32.14717 |
| 489.34651 | 257.76474 | 100.82972 | 31.84974 |
| 504.02691 | 255.32123 | 99.87541  | 31.55347 |
| 519.14772 | 252.90601 | 98.92663  | 31.25848 |
| 534.72216 | 250.51888 | 97.98368  | 30.96489 |
| 550.76383 | 248.15965 | 97.04687  | 30.67279 |
| 567.28675 | 245.82812 | 96.11646  | 30.3823  |
| 584.30535 | 243.52407 | 95.19272  | 30.09351 |
| 601.83452 | 241.24728 | 94.27589  | 29.80651 |
| 619.88956 | 238.99751 | 93.36619  | 29.5214  |
| 638.48625 | 236.77452 | 92.46383  | 29.23824 |
| 657.64084 | 234.57808 | 91.569    | 28.95713 |
| 677.37008 | 232.40793 | 90.68187  | 28.67813 |
| 697.69118 | 230.26383 | 89.8026   | 28.40131 |
| 718.62192 | 228.14551 | 88.93133  | 28.12673 |
| 740.18059 | 226.05271 | 88.06818  | 27.85445 |
| 762.38601 | 223.98519 | 87.21325  | 27.58451 |
| 785.25759 | 221.94267 | 86.36664  | 27.31697 |
| 808.81533 | 219.92489 | 85.52844  | 27.05187 |
| 833.07979 | 217.93158 | 84.69869  | 26.78924 |
| 858.07219 | 215.96249 | 83.87746  | 26.52911 |
| 883.81436 | 214.01733 | 83.06477  | 26.27151 |
| 910.3288  | 212.09586 | 82.26067  | 26.01646 |
| 937.63867 | 210.19779 | 81.46517  | 25.76399 |
| 965.76783 | 208.32286 | 80.67827  | 25.5141  |

|            |           |          |          |
|------------|-----------|----------|----------|
| 994.74087  | 206.4708  | 79.89997 | 25.26681 |
| 1024.58311 | 204.64135 | 79.13026 | 25.02212 |
| 1055.3206  | 202.83424 | 78.36913 | 24.78005 |
| 1086.98023 | 201.04921 | 77.61654 | 24.54059 |
| 1119.58964 | 199.286   | 76.87246 | 24.30374 |
| 1153.17733 | 197.54433 | 76.13686 | 24.0695  |
| 1187.77266 | 195.82395 | 75.40969 | 23.83786 |
| 1223.40584 | 194.12459 | 74.69091 | 23.60882 |
| 1260.10803 | 192.44601 | 73.98046 | 23.38235 |
| 1297.91127 | 190.78794 | 73.27829 | 23.15847 |
| 1336.84861 | 189.15012 | 72.58433 | 22.93714 |
| 1376.95408 | 187.53231 | 71.89854 | 22.71836 |
| 1418.26271 | 185.93424 | 71.22083 | 22.5021  |
| 1460.81059 | 184.35568 | 70.55115 | 22.28836 |
| 1504.63492 | 182.79637 | 69.88943 | 22.07712 |
| 1549.77397 | 181.25607 | 69.23559 | 21.86835 |
| 1596.26719 | 179.73452 | 68.58957 | 21.66204 |
| 1644.15521 | 178.2315  | 67.95129 | 21.45816 |
| 1693.47988 | 176.74676 | 67.32069 | 21.25671 |
| 1744.28428 | 175.28006 | 66.69767 | 21.05765 |
| 1796.61281 | 173.83117 | 66.08218 | 20.86096 |
| 1850.5112  | 172.39985 | 65.47412 | 20.66663 |
| 1906.02654 | 170.98588 | 64.87343 | 20.47462 |
| 1963.20734 | 169.58902 | 64.28003 | 20.28493 |
| 2022.10357 | 168.20905 | 63.69384 | 20.09752 |
| 2082.76668 | 166.84575 | 63.11478 | 19.91237 |

|            |           |          |          |
|------------|-----------|----------|----------|
| 2145.24969 | 165.4989  | 62.54278 | 19.72946 |
| 2209.60718 | 164.16827 | 61.97775 | 19.54876 |
| 2275.8954  | 162.85366 | 61.41962 | 19.37026 |
| 2344.17227 | 161.55484 | 60.8683  | 19.19393 |
| 2414.49744 | 160.2716  | 60.32373 | 19.01974 |
| 2486.93237 | 159.00375 | 59.78582 | 18.84767 |
| 2561.54035 | 157.75106 | 59.25449 | 18.6777  |
| 2638.38656 | 156.51333 | 58.72967 | 18.5098  |
| 2717.53817 | 155.29038 | 58.21128 | 18.34396 |
| 2799.06432 | 154.08198 | 57.69924 | 18.18014 |
| 2883.03625 | 152.88795 | 57.19347 | 18.01832 |
| 2969.52734 | 151.7081  | 56.6939  | 17.85849 |
| 3058.61317 | 150.54223 | 56.20045 | 17.70061 |
| 3150.37157 | 149.39015 | 55.71305 | 17.54466 |
| 3244.88272 | 148.25167 | 55.23162 | 17.39062 |
| 3342.22921 | 147.12662 | 54.75608 | 17.23847 |
| 3442.49609 | 146.0148  | 54.28637 | 17.08818 |
| 3545.77098 | 144.91603 | 53.8224  | 16.93973 |
| 3652.14411 | 143.83015 | 53.36411 | 16.7931  |
| 3761.70844 | 142.75697 | 52.91142 | 16.64826 |
| 3874.5597  | 141.69632 | 52.46426 | 16.5052  |
| 3990.7965  | 140.64802 | 52.02256 | 16.36389 |
| 4110.5204  | 139.61192 | 51.58625 | 16.2243  |
| 4233.83601 | 138.58784 | 51.15526 | 16.08642 |
| 4360.8511  | 137.57563 | 50.72951 | 15.95022 |
| 4491.67664 | 136.57511 | 50.30895 | 15.81569 |

|            |           |          |          |
|------------|-----------|----------|----------|
| 4626.42694 | 135.58612 | 49.8935  | 15.6828  |
| 4765.21976 | 134.60852 | 49.4831  | 15.55152 |
| 4908.17635 | 133.64214 | 49.07767 | 15.42185 |
| 5055.42165 | 132.68684 | 48.67716 | 15.29375 |
| 5207.08431 | 131.74245 | 48.2815  | 15.16721 |
| 5363.29684 | 130.80884 | 47.89062 | 15.04221 |
| 5524.19575 | 129.88585 | 47.50445 | 14.91872 |
| 5689.92163 | 128.97333 | 47.12295 | 14.79674 |
| 5860.61928 | 128.07116 | 46.74604 | 14.67622 |
| 6036.43787 | 127.17918 | 46.37366 | 14.55717 |
| 6217.53101 | 126.29725 | 46.00575 | 14.43955 |
| 6404.05694 | 125.42524 | 45.64225 | 14.32335 |
| 6596.17866 | 124.56302 | 45.28311 | 14.20855 |
| 6794.06402 | 123.71044 | 44.92825 | 14.09513 |
| 6997.88595 | 122.86739 | 44.57764 | 13.98308 |
| 7207.82253 | 122.03372 | 44.23119 | 13.87236 |
| 7424.05721 | 121.20932 | 43.88887 | 13.76298 |
| 7646.77893 | 120.39405 | 43.55062 | 13.6549  |
| 7876.18231 | 119.58779 | 43.21637 | 13.54811 |
| 8112.46778 | 118.79042 | 42.88608 | 13.4426  |
| 8355.84182 | 118.00183 | 42.55969 | 13.33834 |
| 8606.51708 | 117.22188 | 42.23715 | 13.23532 |
| 8864.7126  | 116.45046 | 41.9184  | 13.13352 |
| 9130.65398 | 115.68746 | 41.6034  | 13.03292 |
| 9404.57361 | 114.93277 | 41.29209 | 12.93352 |
| 9686.71082 | 114.18627 | 40.98442 | 12.83529 |

|             |           |          |          |
|-------------|-----------|----------|----------|
| 9977.31215  | 113.44785 | 40.68034 | 12.73821 |
| 10276.63152 | 112.7174  | 40.37981 | 12.64228 |
| 10584.93047 | 111.99481 | 40.08277 | 12.54747 |
| 10902.47839 | 111.27999 | 39.78917 | 12.45377 |
| 11229.55275 | 110.57282 | 39.49898 | 12.36116 |
| 11566.43933 | 109.87321 | 39.21214 | 12.26964 |
| 11913.43252 | 109.18104 | 38.92861 | 12.17918 |
| 12270.8355  | 108.49623 | 38.64834 | 12.08977 |
| 12638.96057 | 107.81868 | 38.37128 | 12.0014  |
| 13018.12939 | 107.14827 | 38.0974  | 11.91405 |
| 13408.67328 | 106.48494 | 37.82665 | 11.8277  |
| 13810.93348 | 105.82856 | 37.55898 | 11.74235 |
| 14225.26149 | 105.17907 | 37.29436 | 11.65799 |
| 14652.01934 | 104.53636 | 37.03275 | 11.57459 |
| 15091.57993 | 103.90034 | 36.77409 | 11.49214 |
| 15544.32733 | 103.27092 | 36.51836 | 11.41063 |
| 16010.65716 | 102.64803 | 36.26551 | 11.33006 |
| 16490.97688 | 102.03157 | 36.0155  | 11.25039 |
| 16985.70619 | 101.42145 | 35.76829 | 11.17163 |
| 17495.27738 | 100.8176  | 35.52385 | 11.09377 |
| 18020.13571 | 100.21993 | 35.28214 | 11.01678 |
| 18560.73978 | 99.62836  | 35.04311 | 10.94065 |
| 19117.56198 | 99.04281  | 34.80674 | 10.86538 |
| 19691.08885 | 98.4632   | 34.57299 | 10.79095 |
| 20281.82152 | 97.88946  | 34.34182 | 10.71736 |
| 20890.27617 | 97.3215   | 34.1132  | 10.64458 |



|             |          |          |          |
|-------------|----------|----------|----------|
| 21516.98446 | 96.75926 | 33.88709 | 10.57262 |
| 22162.494   | 96.20266 | 33.66346 | 10.50145 |
| 22827.36882 | 95.65162 | 33.44227 | 10.43107 |
| 23512.18989 | 95.10607 | 33.2235  | 10.36147 |
| 24217.55559 | 94.56595 | 33.0071  | 10.29263 |
| 24944.08227 | 94.03118 | 32.79306 | 10.22454 |
| 25692.40474 | 93.50169 | 32.58132 | 10.15721 |
| 26463.17689 | 92.97742 | 32.37188 | 10.0906  |
| 27257.0722  | 92.4583  | 32.16468 | 10.02473 |
| 28074.78437 | 91.94426 | 31.95971 | 9.95956  |
| 28917.02791 | 91.43524 | 31.75693 | 9.89511  |
| 29784.53875 | 90.93117 | 31.55632 | 9.83135  |
| 30678.07492 | 90.43199 | 31.35784 | 9.76827  |
| 31598.41717 | 89.93764 | 31.16146 | 9.70588  |
| 32546.36969 | 89.44806 | 30.96717 | 9.64415  |
| 33522.76079 | 88.96319 | 30.77493 | 9.58309  |
| 34528.44362 | 88.48296 | 30.5847  | 9.52267  |
| 35564.29693 | 88.00733 | 30.39648 | 9.4629   |
| 36631.22584 | 87.53623 | 30.21023 | 9.40375  |
| 37730.16262 | 87.0696  | 30.02591 | 9.34524  |
| 38862.06751 | 86.60739 | 29.84352 | 9.28734  |
| 40027.92954 | 86.14955 | 29.66302 | 9.23005  |
| 41228.76743 | 85.69602 | 29.48439 | 9.17336  |
| 42465.63046 | 85.24675 | 29.30759 | 9.11726  |
| 43739.59938 | 84.80168 | 29.13262 | 9.06175  |
| 45051.78736 | 84.36078 | 28.95944 | 9.00681  |

|             |          |          |         |
|-------------|----------|----------|---------|
| 46403.34099 | 83.92399 | 28.78804 | 8.95245 |
| 47795.44123 | 83.49126 | 28.61838 | 8.89864 |
| 49229.30447 | 83.06255 | 28.45045 | 8.84539 |
| 50706.18361 | 82.63782 | 28.28421 | 8.79268 |
| 52227.36912 | 82.21702 | 28.11966 | 8.74052 |
| 53794.1902  | 81.80012 | 27.95677 | 8.68889 |
| 55408.01591 | 81.38708 | 27.79551 | 8.63778 |
| 57070.25639 | 80.97788 | 27.63587 | 8.5872  |
| 58782.36409 | 80.57247 | 27.47783 | 8.53712 |
| 60545.83502 | 80.17085 | 27.32136 | 8.48755 |
| 62362.21007 | 79.77299 | 27.16644 | 8.43848 |
| 64233.07638 | 79.37888 | 27.01305 | 8.3899  |
| 66160.06868 | 78.9885  | 26.86118 | 8.34181 |
| 68144.87074 | 78.60187 | 26.71081 | 8.2942  |
| 70189.21687 | 78.21898 | 26.5619  | 8.24706 |
| 72294.89338 | 77.83984 | 26.41446 | 8.20039 |
| 74463.74019 | 77.46448 | 26.26845 | 8.15418 |
| 76697.6524  | 77.09293 | 26.12387 | 8.10842 |
| 78998.58198 | 76.72522 | 25.98068 | 8.06312 |
| 81368.53944 | 76.36141 | 25.83888 | 8.01826 |
| 83809.59563 | 76.00155 | 25.69845 | 7.97383 |
| 86323.8835  | 75.64572 | 25.55937 | 7.92984 |
| 88913.60002 | 75.29399 | 25.42162 | 7.88628 |
| 91581.00802 | 74.94645 | 25.28519 | 7.84314 |
| 94328.43827 | 74.60322 | 25.15006 | 7.80042 |
| 97158.29142 | 74.26439 | 25.01622 | 7.75811 |

|             |          |          |         |
|-------------|----------|----------|---------|
| 100073.0402 | 73.9301  | 24.88366 | 7.7162  |
| 103075.2314 | 73.60048 | 24.75235 | 7.6747  |
| 106167.4883 | 73.27568 | 24.62229 | 7.6336  |
| 109352.513  | 72.95585 | 24.49347 | 7.59289 |
| 112633.0884 | 72.64114 | 24.36586 | 7.55257 |
| 116012.081  | 72.33174 | 24.23947 | 7.51264 |
| 119492.4435 | 72.02782 | 24.11429 | 7.47309 |
| 123077.2168 | 71.72957 | 23.9903  | 7.43392 |
| 126769.5333 | 71.43716 | 23.8675  | 7.39513 |
| 130572.6193 | 71.15079 | 23.74588 | 7.35671 |
| 134489.7979 | 70.87065 | 23.62545 | 7.31866 |
| 138524.4918 | 70.59692 | 23.50619 | 7.28099 |
| 142680.2266 | 70.32979 | 23.38812 | 7.24369 |
| 146960.6334 | 70.06945 | 23.27124 | 7.20676 |
| 151369.4524 | 69.81608 | 23.15555 | 7.1702  |
| 155910.536  | 69.56983 | 23.04106 | 7.13402 |
| 160587.852  | 69.33086 | 22.92778 | 7.09821 |
| 165405.4876 | 69.09934 | 22.81573 | 7.06279 |
| 170367.6522 | 68.87538 | 22.70492 | 7.02774 |
| 175478.6818 | 68.65911 | 22.59537 | 6.99309 |
| 180743.0423 | 68.45062 | 22.48712 | 6.95883 |
| 186165.3336 | 68.25002 | 22.38018 | 6.92497 |
| 191750.2936 | 68.05735 | 22.27459 | 6.89152 |
| 197502.8024 | 67.87267 | 22.17038 | 6.8585  |
| 203427.8865 | 67.69601 | 22.06759 | 6.8259  |
| 209530.7231 | 67.52736 | 21.96626 | 6.79374 |

|             |          |          |         |
|-------------|----------|----------|---------|
| 215816.6448 | 67.3667  | 21.86643 | 6.76204 |
| 222291.1441 | 67.214   | 21.76815 | 6.73081 |
| 228959.8784 | 67.0692  | 21.67147 | 6.70005 |
| 235828.6748 | 66.9322  | 21.57644 | 6.6698  |
| 242903.535  | 66.8029  | 21.48311 | 6.64005 |
| 250190.6411 | 66.68117 | 21.39155 | 6.61084 |
| 257696.3603 | 66.56687 | 21.30179 | 6.58217 |
| 265427.2511 | 66.45981 | 21.21391 | 6.55406 |
| 265427.2511 | 66.45981 | 21.21391 | 6.55406 |
